# Supplementary material for: New Charged Cholinesterase Inhibitors: Design, Synthesis, and Characterization
Source: MDPI journal article supplement (doi:10.3390/molecules29071622), 2024-04-04
Supplement: s1 [file s1]

## *Electronic Supporting Information*

*Article*

# **New charged cholinesterase inhibitors; Design, synthesis and characterization**

**Milena Mlakić <sup>1</sup>, Danijela Barić <sup>2</sup>, Ana Ratković <sup>3</sup>, Ivana Šagud <sup>4</sup>, Ivona Čipor <sup>5</sup>, Ivo Piantanida <sup>5</sup>, Ilijana Odak <sup>6,\*</sup> and Irena Škorić<sup>1,\*</sup>**

<sup>1</sup> Department of Organic Chemistry, Faculty of Chemical Engineering and Technology, University of Zagreb, Trg Marka Marulića 19, HR-10 000 Zagreb, Croatia

<sup>2</sup> Group for Computational Life Sciences, Division of Physical Chemistry, Ruđer Bošković Institute, Bijenička cesta 54, HR-10 000 Zagreb, Croatia

<sup>3</sup> Chemistry, Selvita Ltd., Prilaz Baruna Filipovića 29, HR-10 000 Zagreb, Croatia

<sup>4</sup> Croatian Agency for Medicinal Products and Medical Devices, Ksaverska Cesta 4, HR-10 000 Zagreb, Croatia

<sup>5</sup> Division of Organic Chemistry and Biochemistry, Ruđer Bošković Institute

<sup>6</sup> Department of Chemistry, Faculty of Science and Education, University of Mostar, Matice hrvatske bb, 88000 Mostar, Bosnia and Herzegovina

\* Correspondence: ilijana.odak@fpmoz.sum.ba (I.O.); iskoric@fkit.unizg.hr (I.Š.)

### **Content:**

|                                                                    |     |
|--------------------------------------------------------------------|-----|
| 1. NMR spektra.....                                                | 2   |
| 2. Mass spectra and HRMS analyses.....                             | 97  |
| 3. Spectrophotometric data and DNA binding.....                    | 111 |
| 4. Cartesian coordinates of ligands docked into AChE and BChE..... | 117 |

## 1. NMR spectra

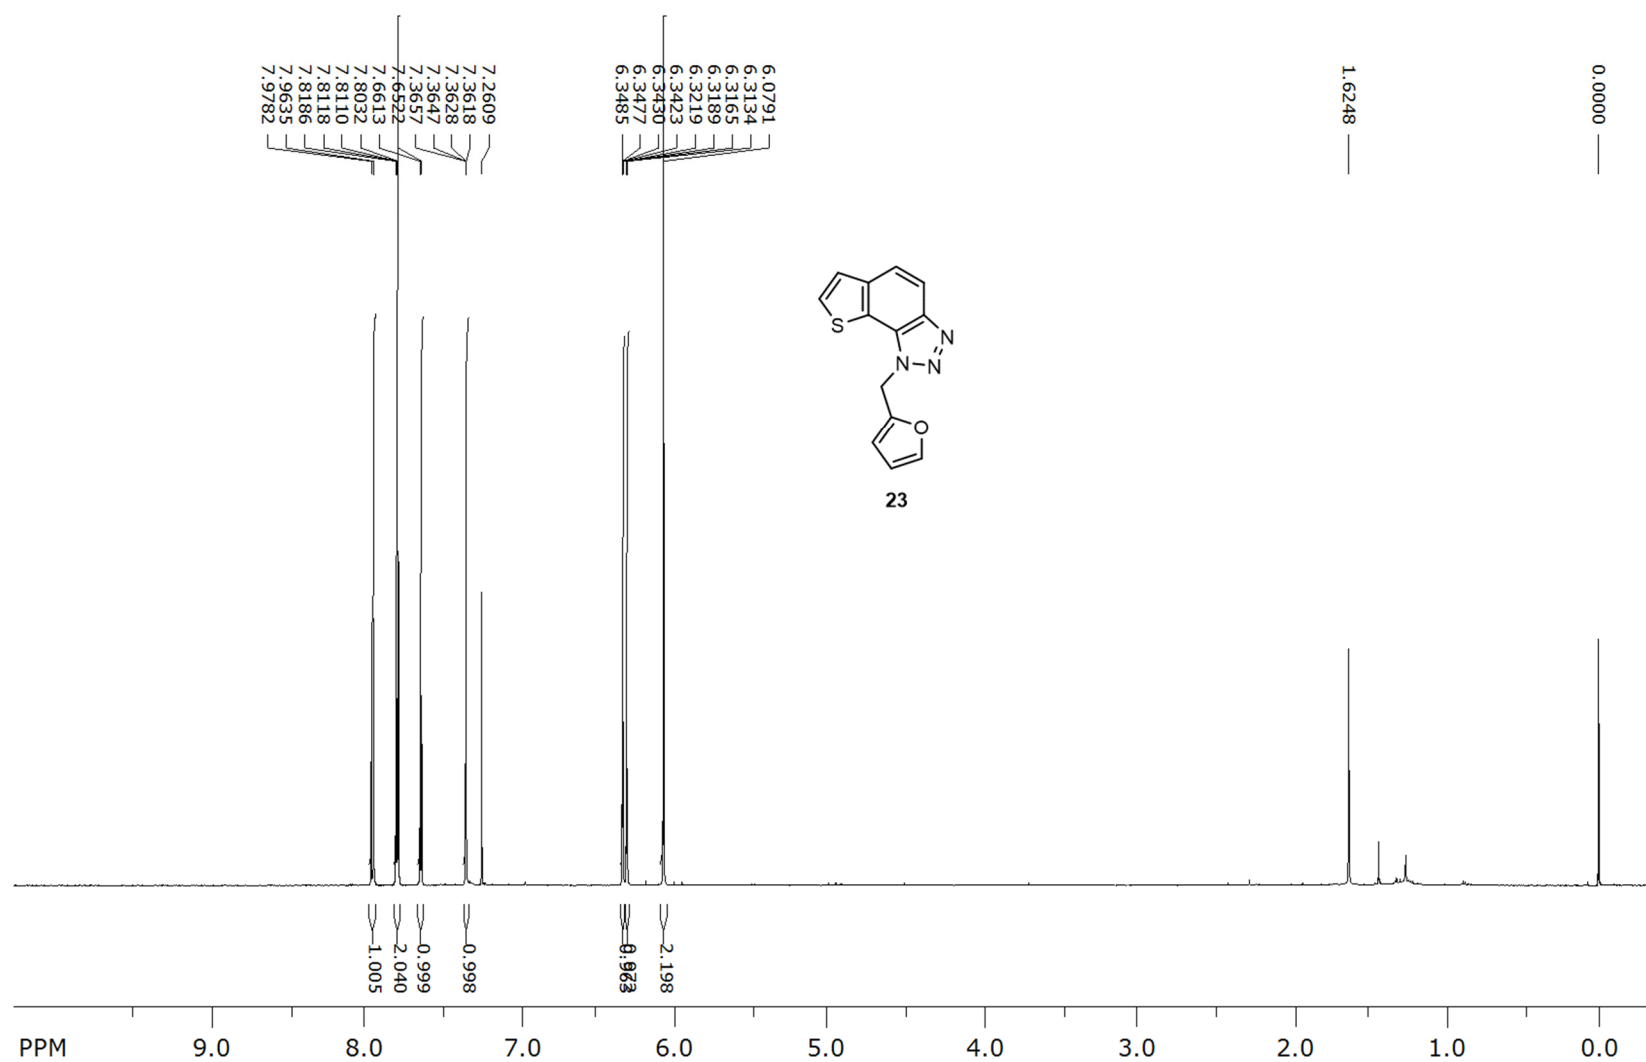

Figure S1. <sup>1</sup>H NMR (CDCl<sub>3</sub>) spectrum of **23**.

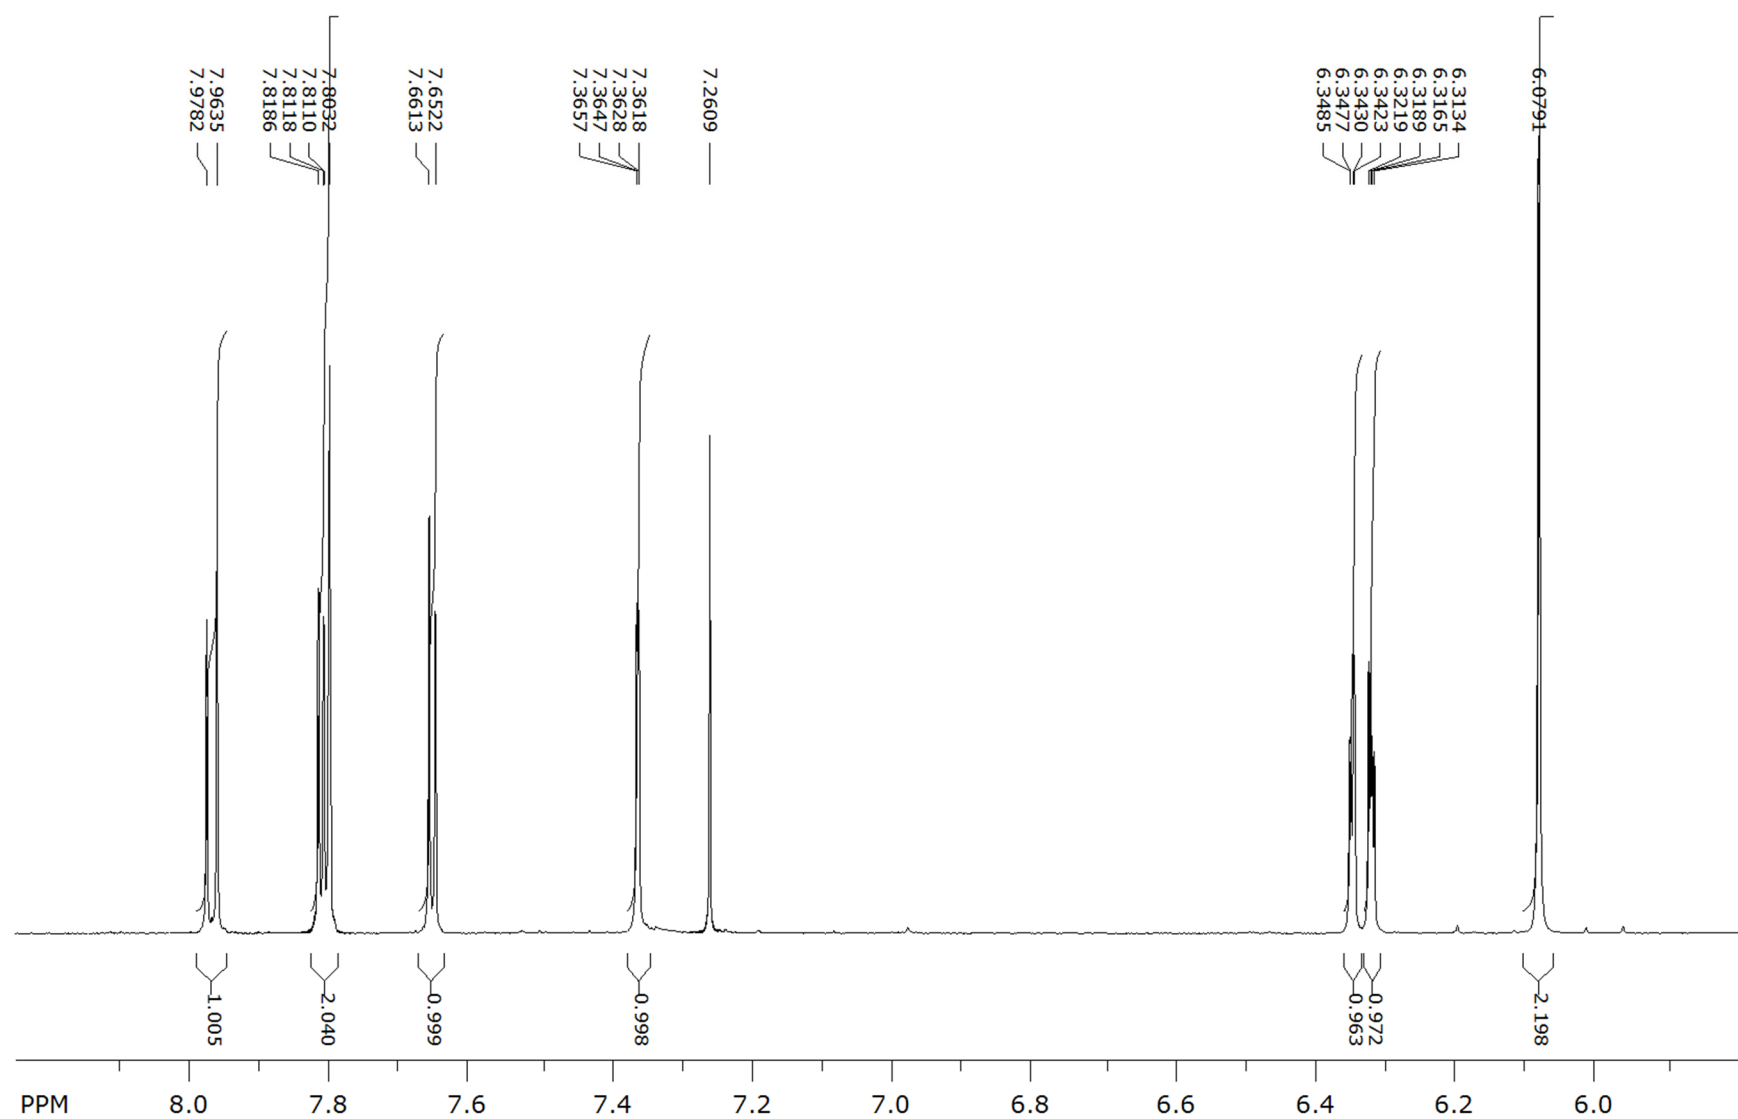

Figure S2. <sup>1</sup>H NMR (CDCl<sub>3</sub>) spectrum of aromatic part of **23**.

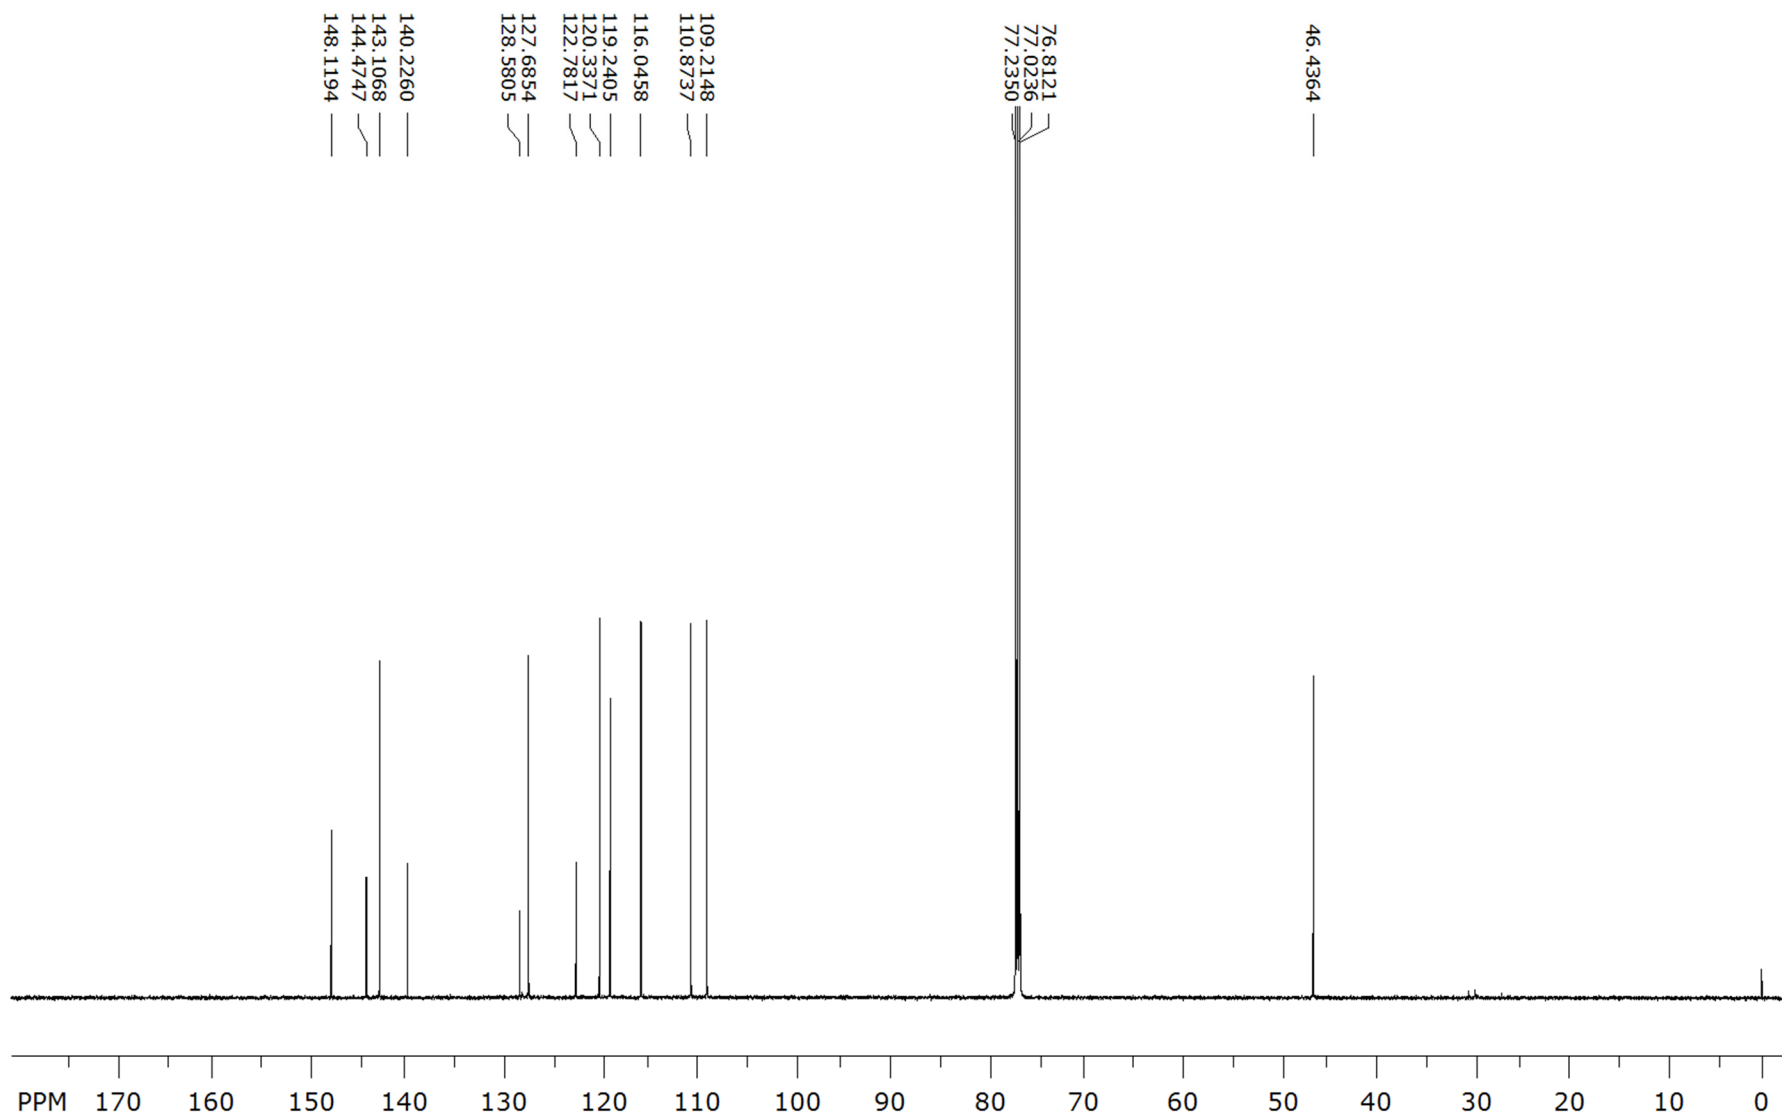

Figure S3. <sup>13</sup>C NMR (CDCl<sub>3</sub>) spectrum of **23**.



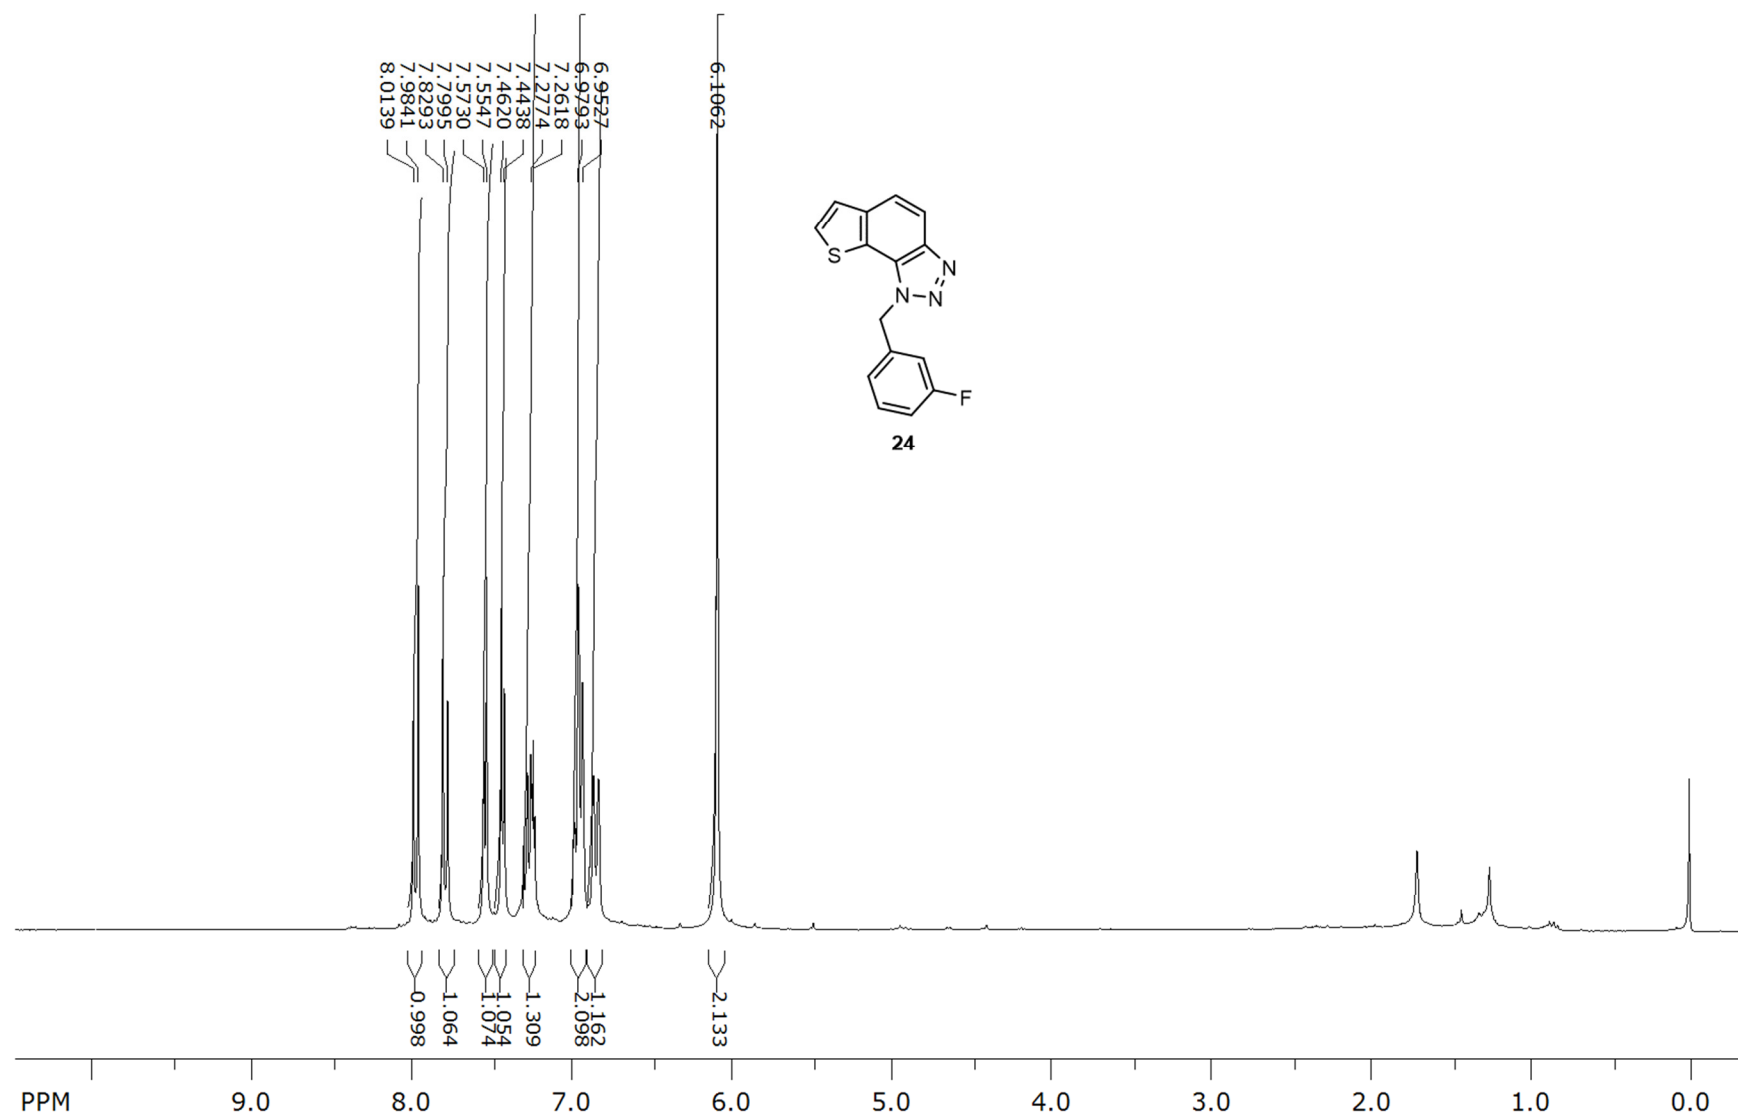

Figure S4.  $^1\text{H}$  NMR ( $\text{CDCl}_3$ ) spectrum of **24**.

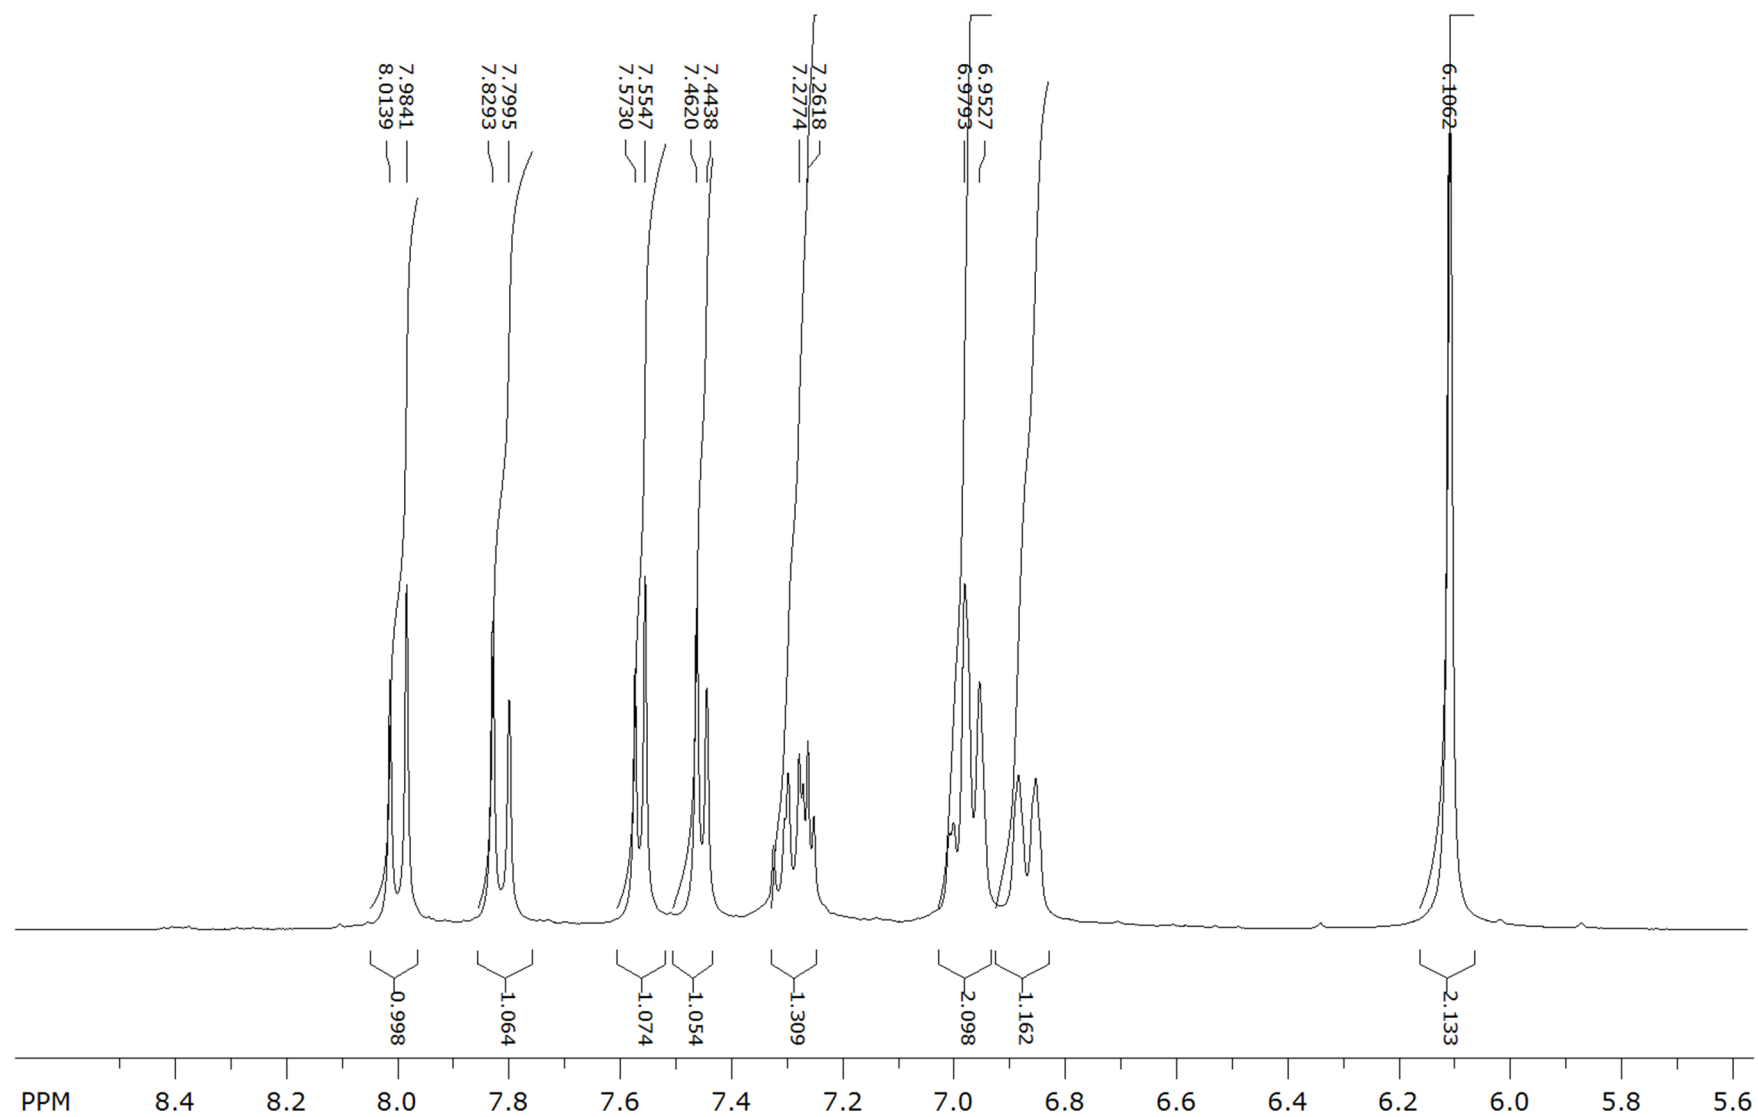

Figure S5. <sup>1</sup>H NMR (CDCl<sub>3</sub>) spectrum of aromatic part of **24**.

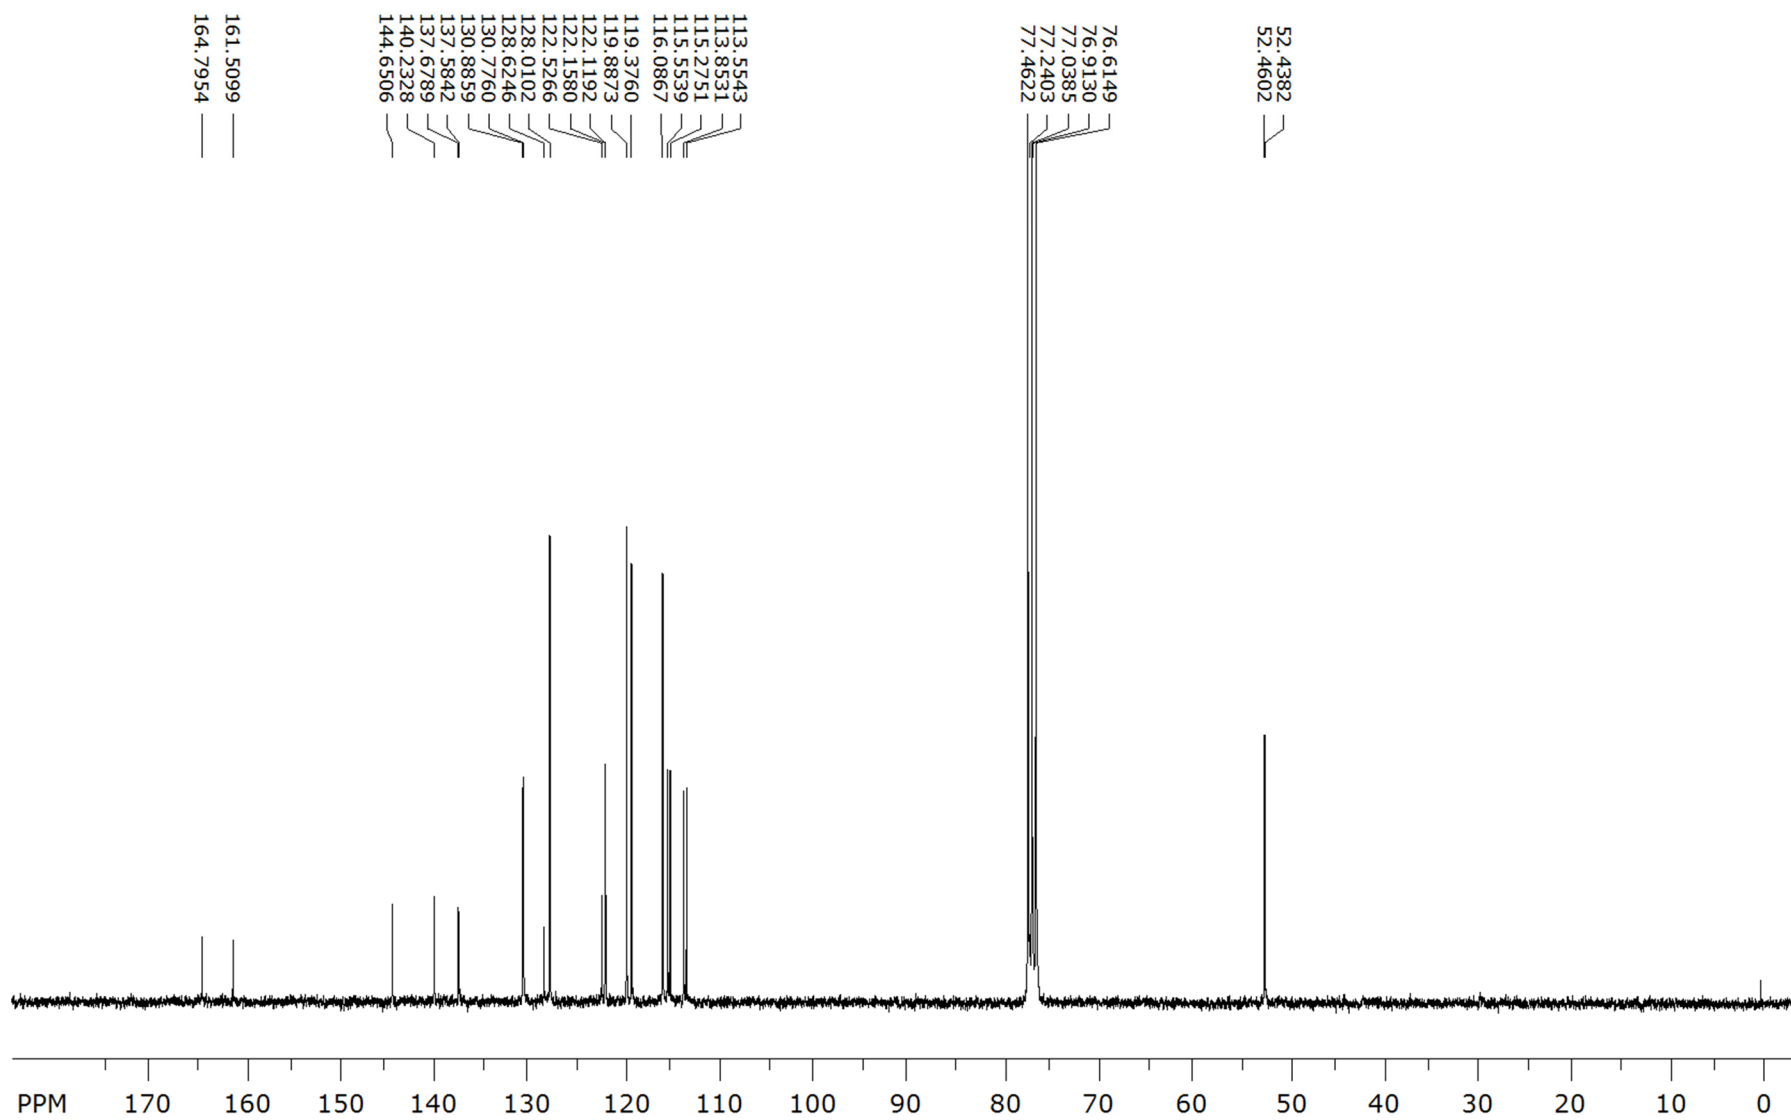

Figure S6. <sup>13</sup>C NMR (CDCl<sub>3</sub>) spectrum of **24**.

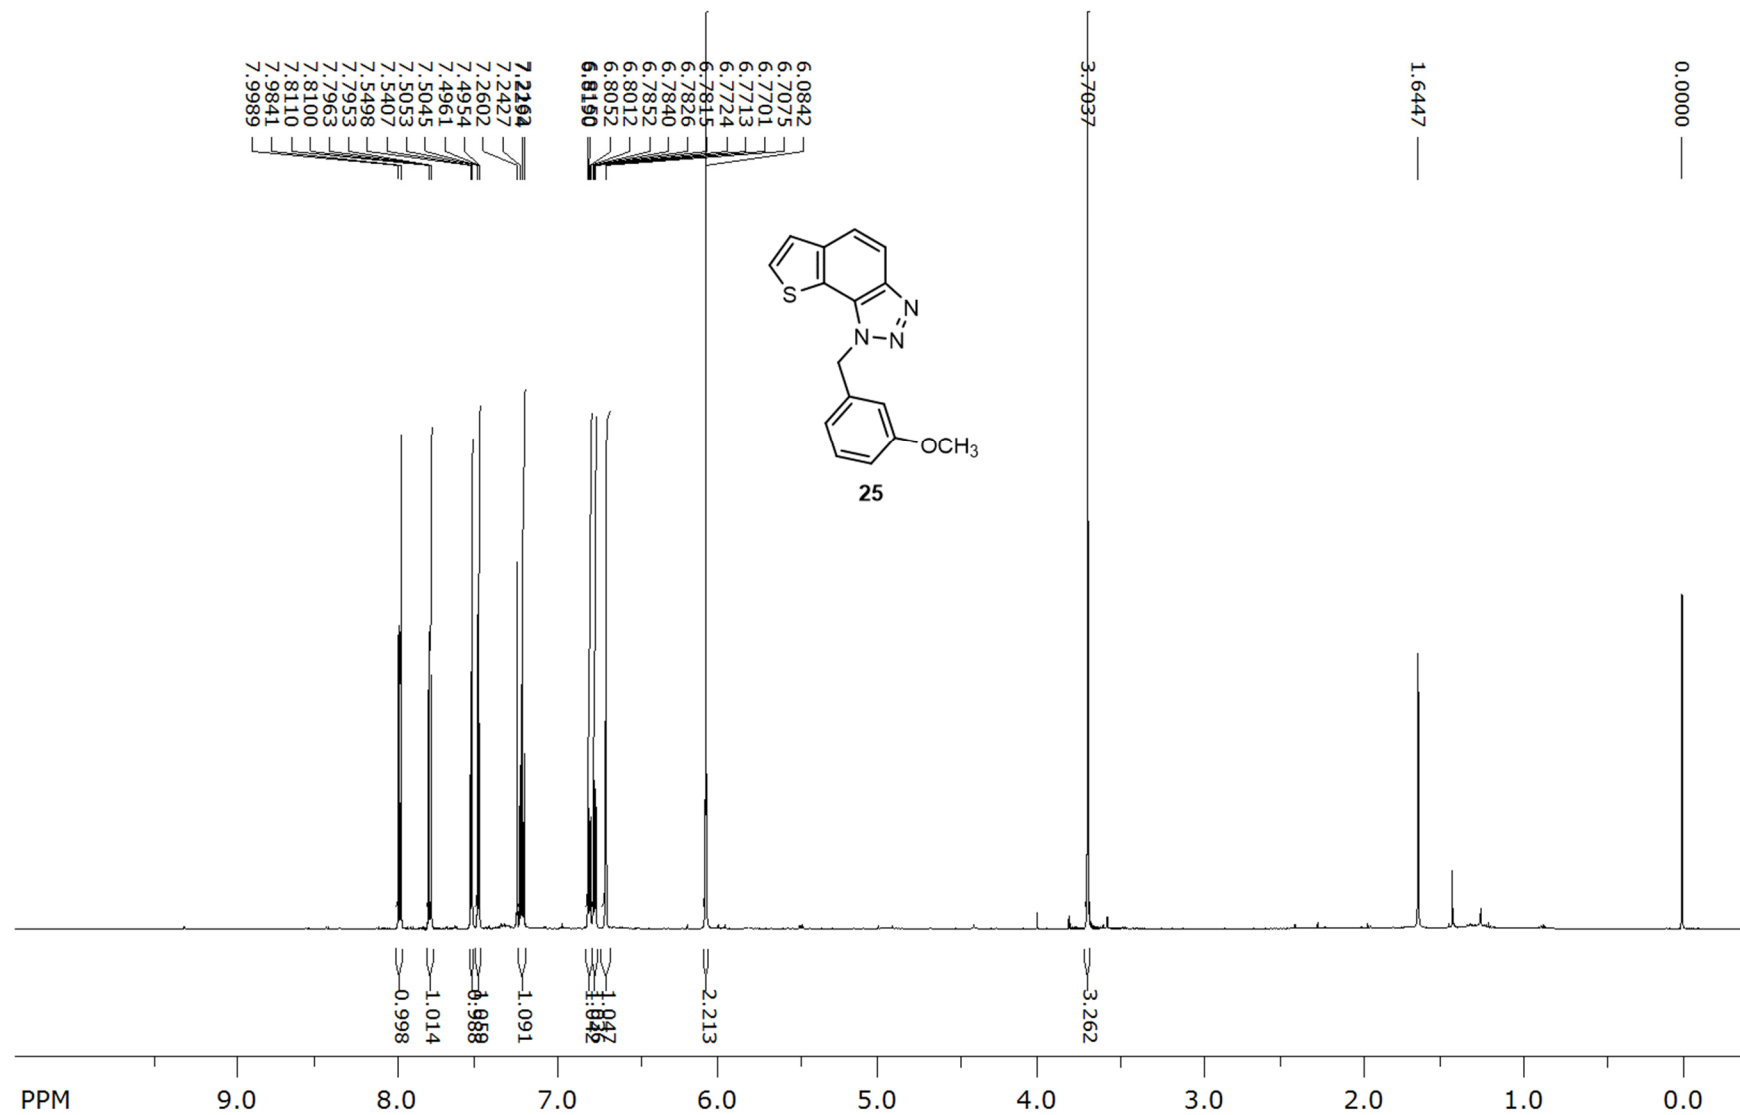

Figure S7. <sup>1</sup>H NMR (CDCl<sub>3</sub>) spectrum of **25**.

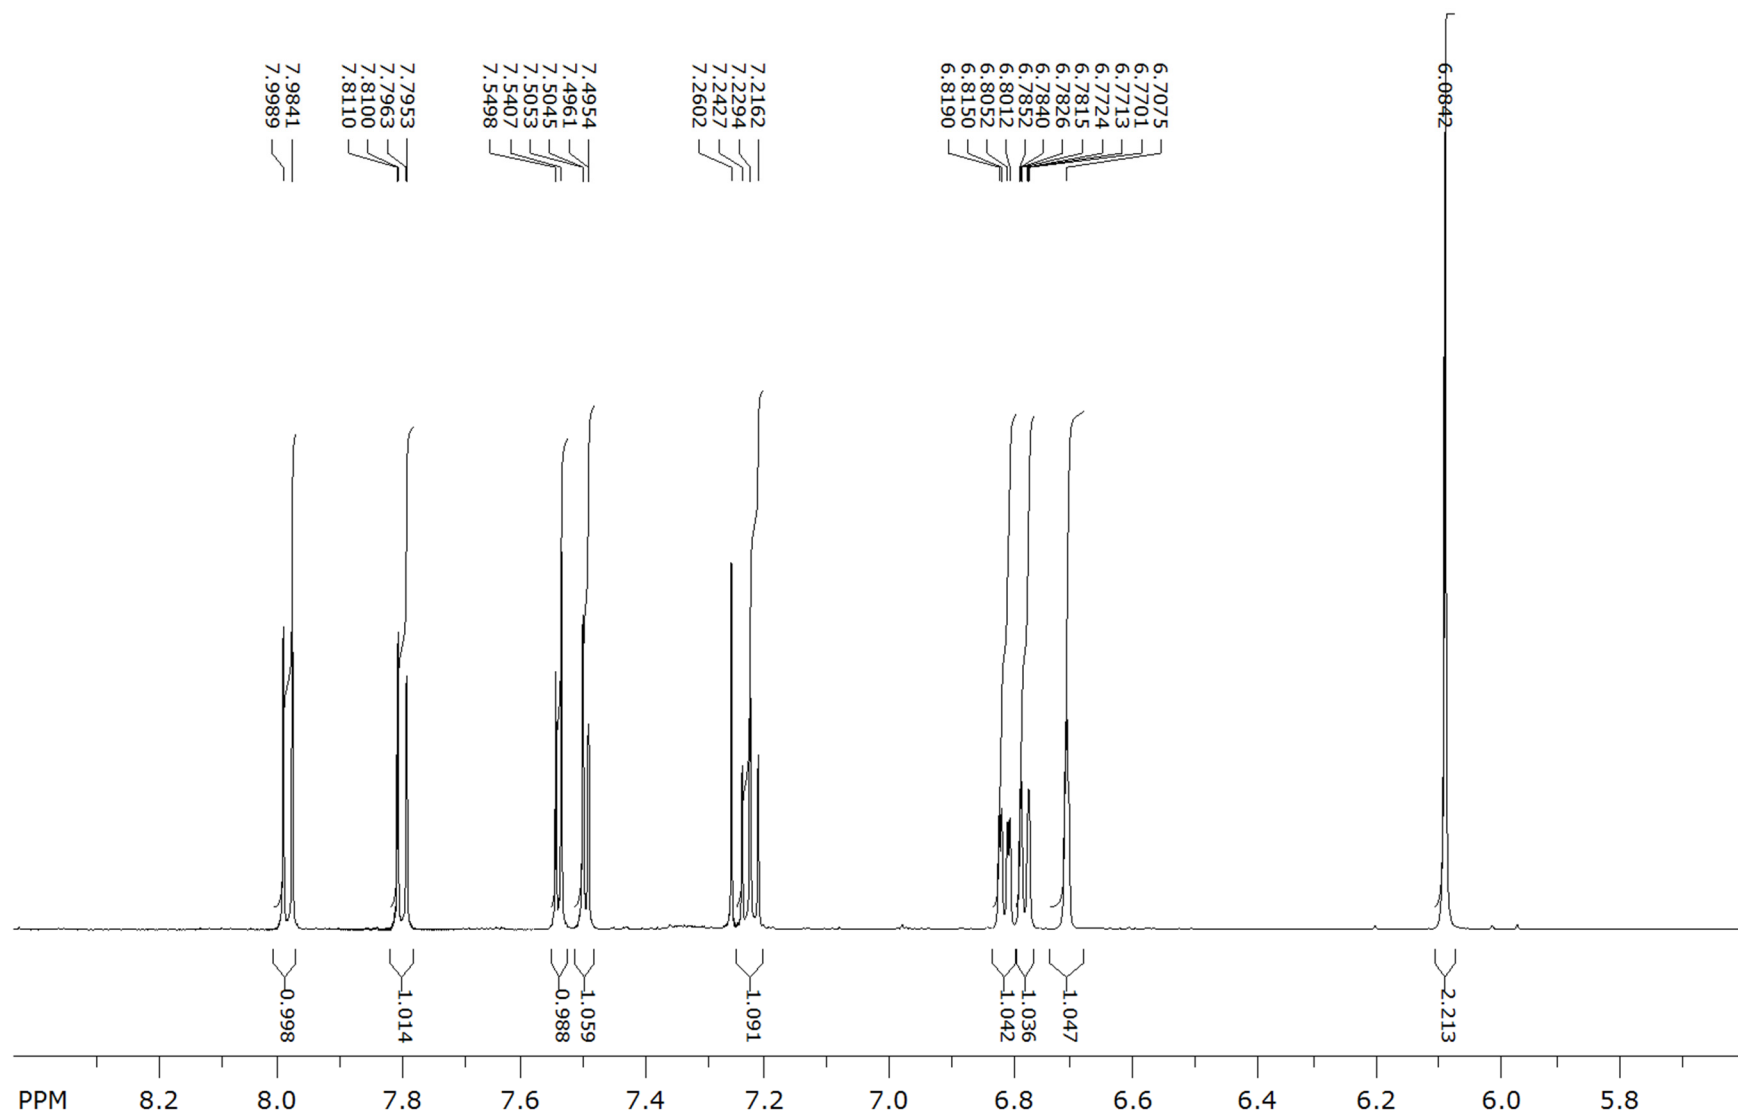

Figure S8. <sup>1</sup>H NMR (CDCl<sub>3</sub>) spectrum of aromatic part of **25**.

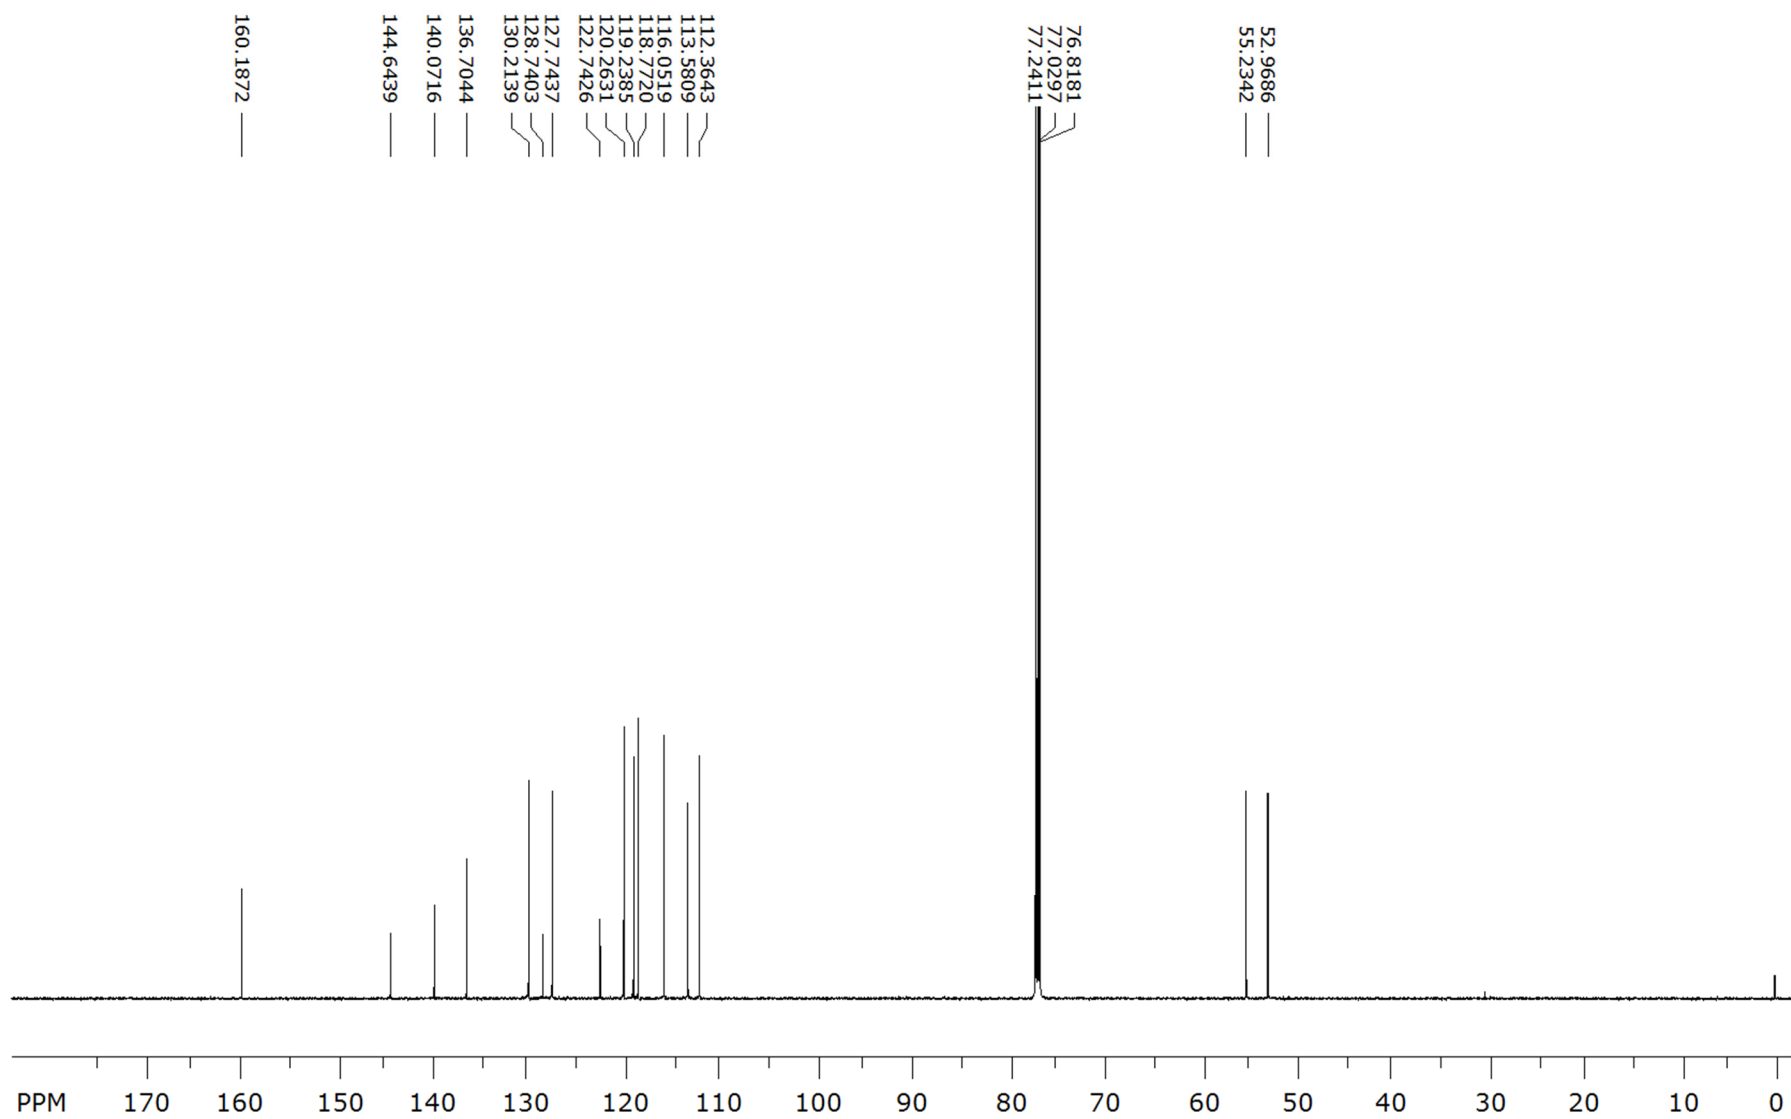

Figure S9.  $^{13}\text{C}$  NMR ( $\text{CDCl}_3$ ) spectrum of **25**.

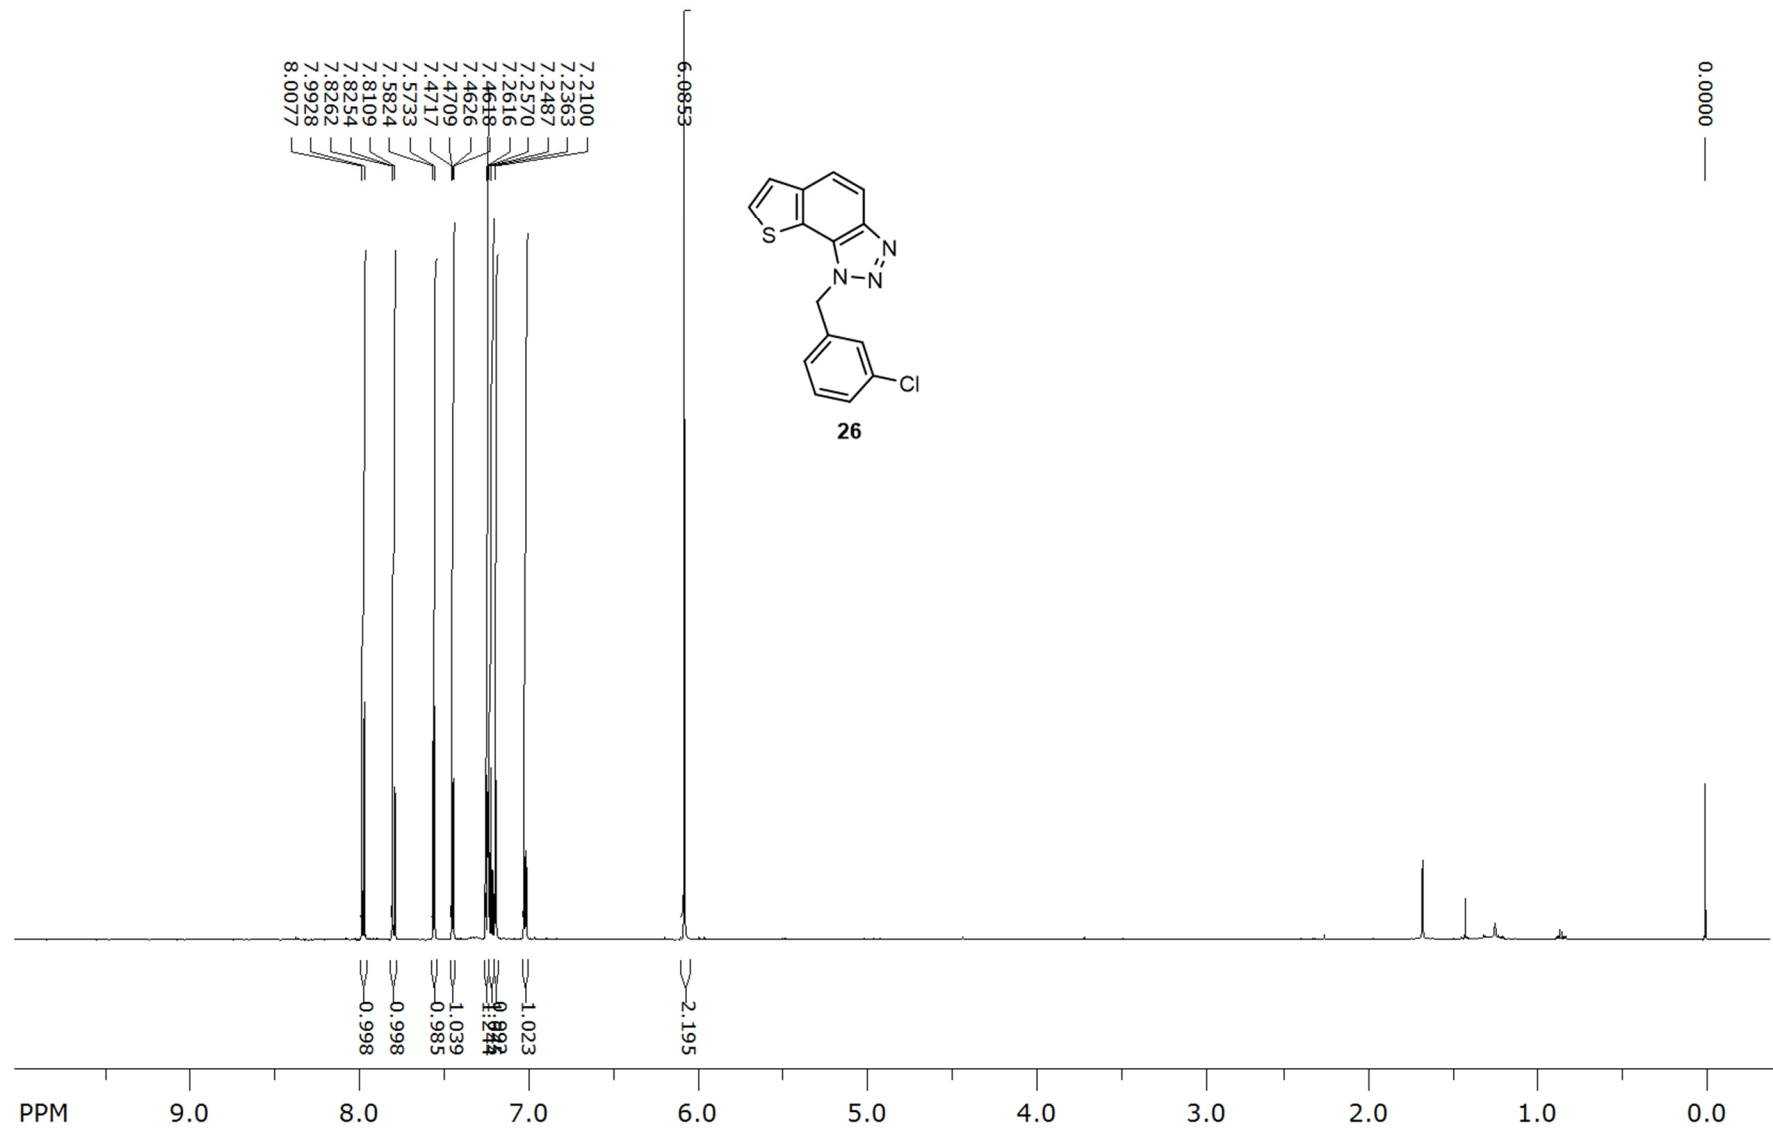

Figure S10. <sup>1</sup>H NMR (CDCl<sub>3</sub>) spectrum of **26**.

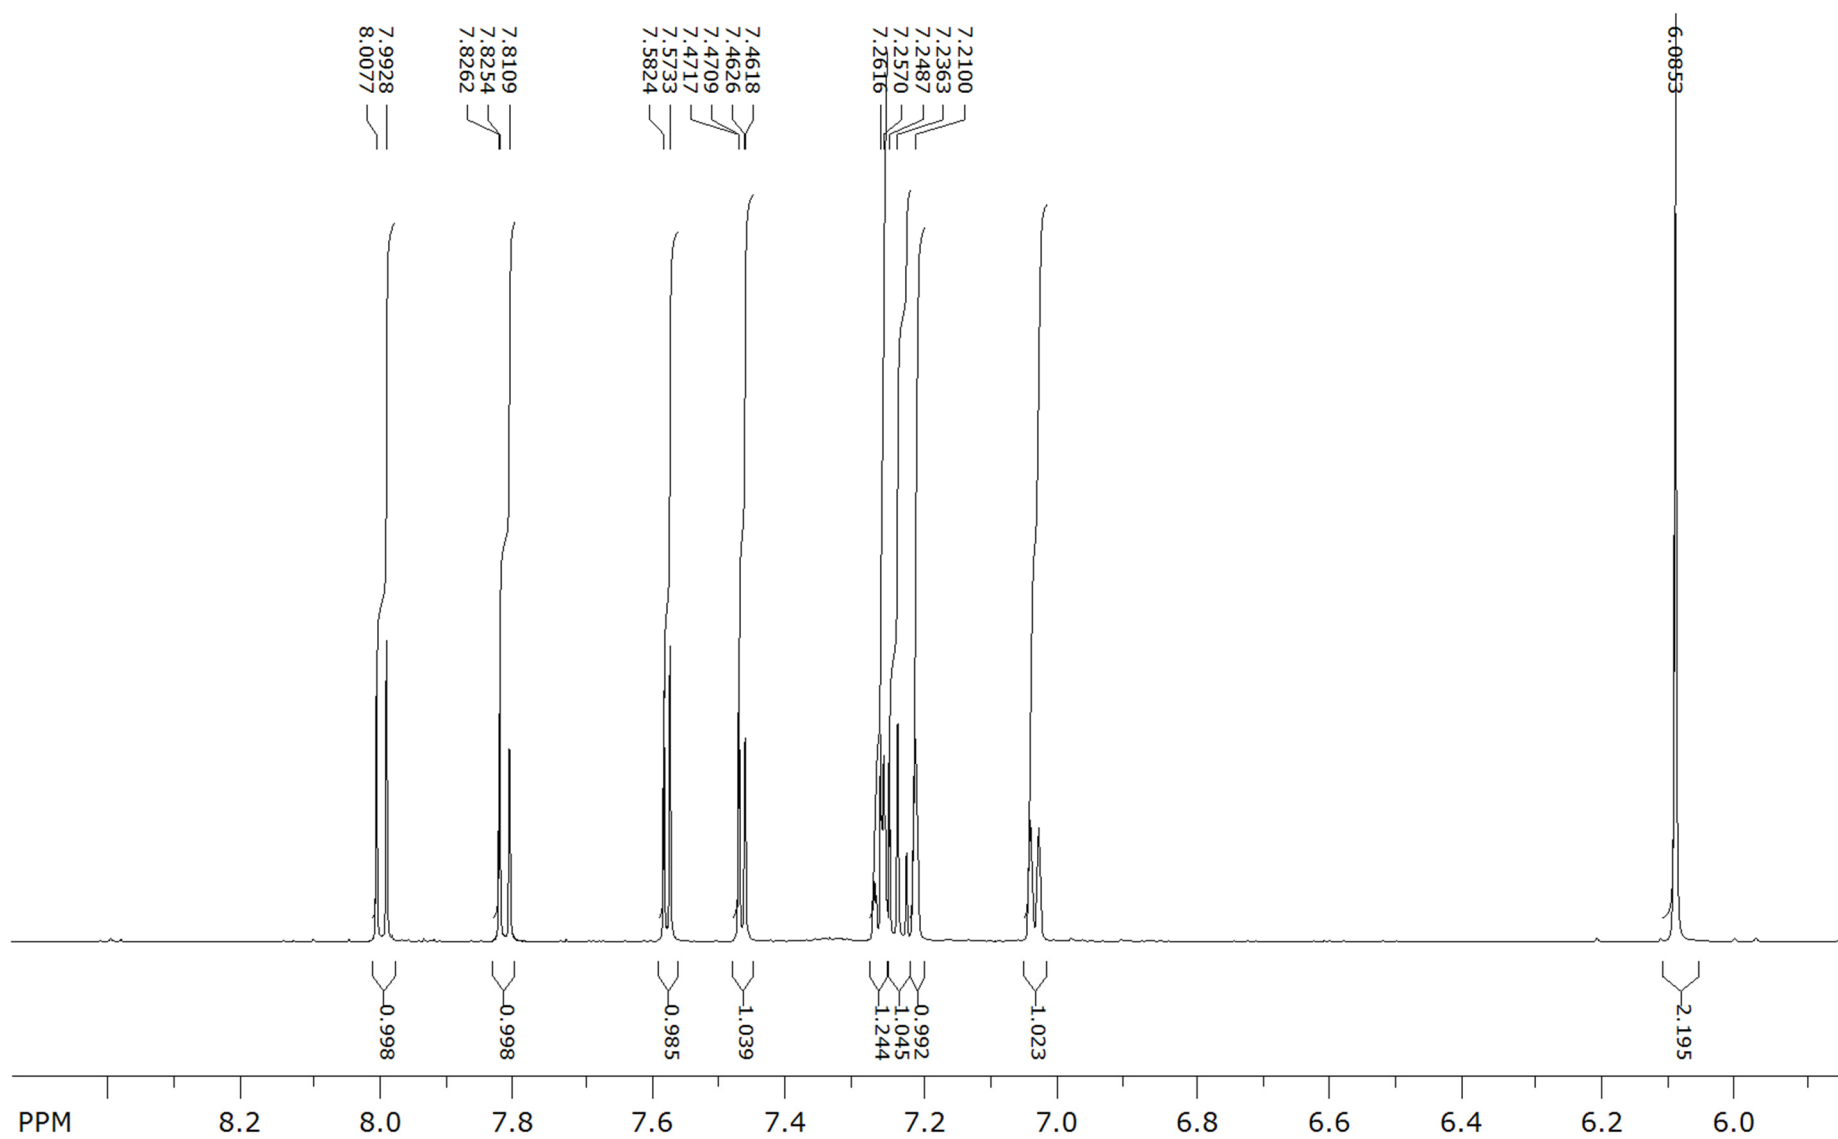

Figure S11. <sup>1</sup>H NMR (CDCl<sub>3</sub>) spectrum of aromatic part of **26**.



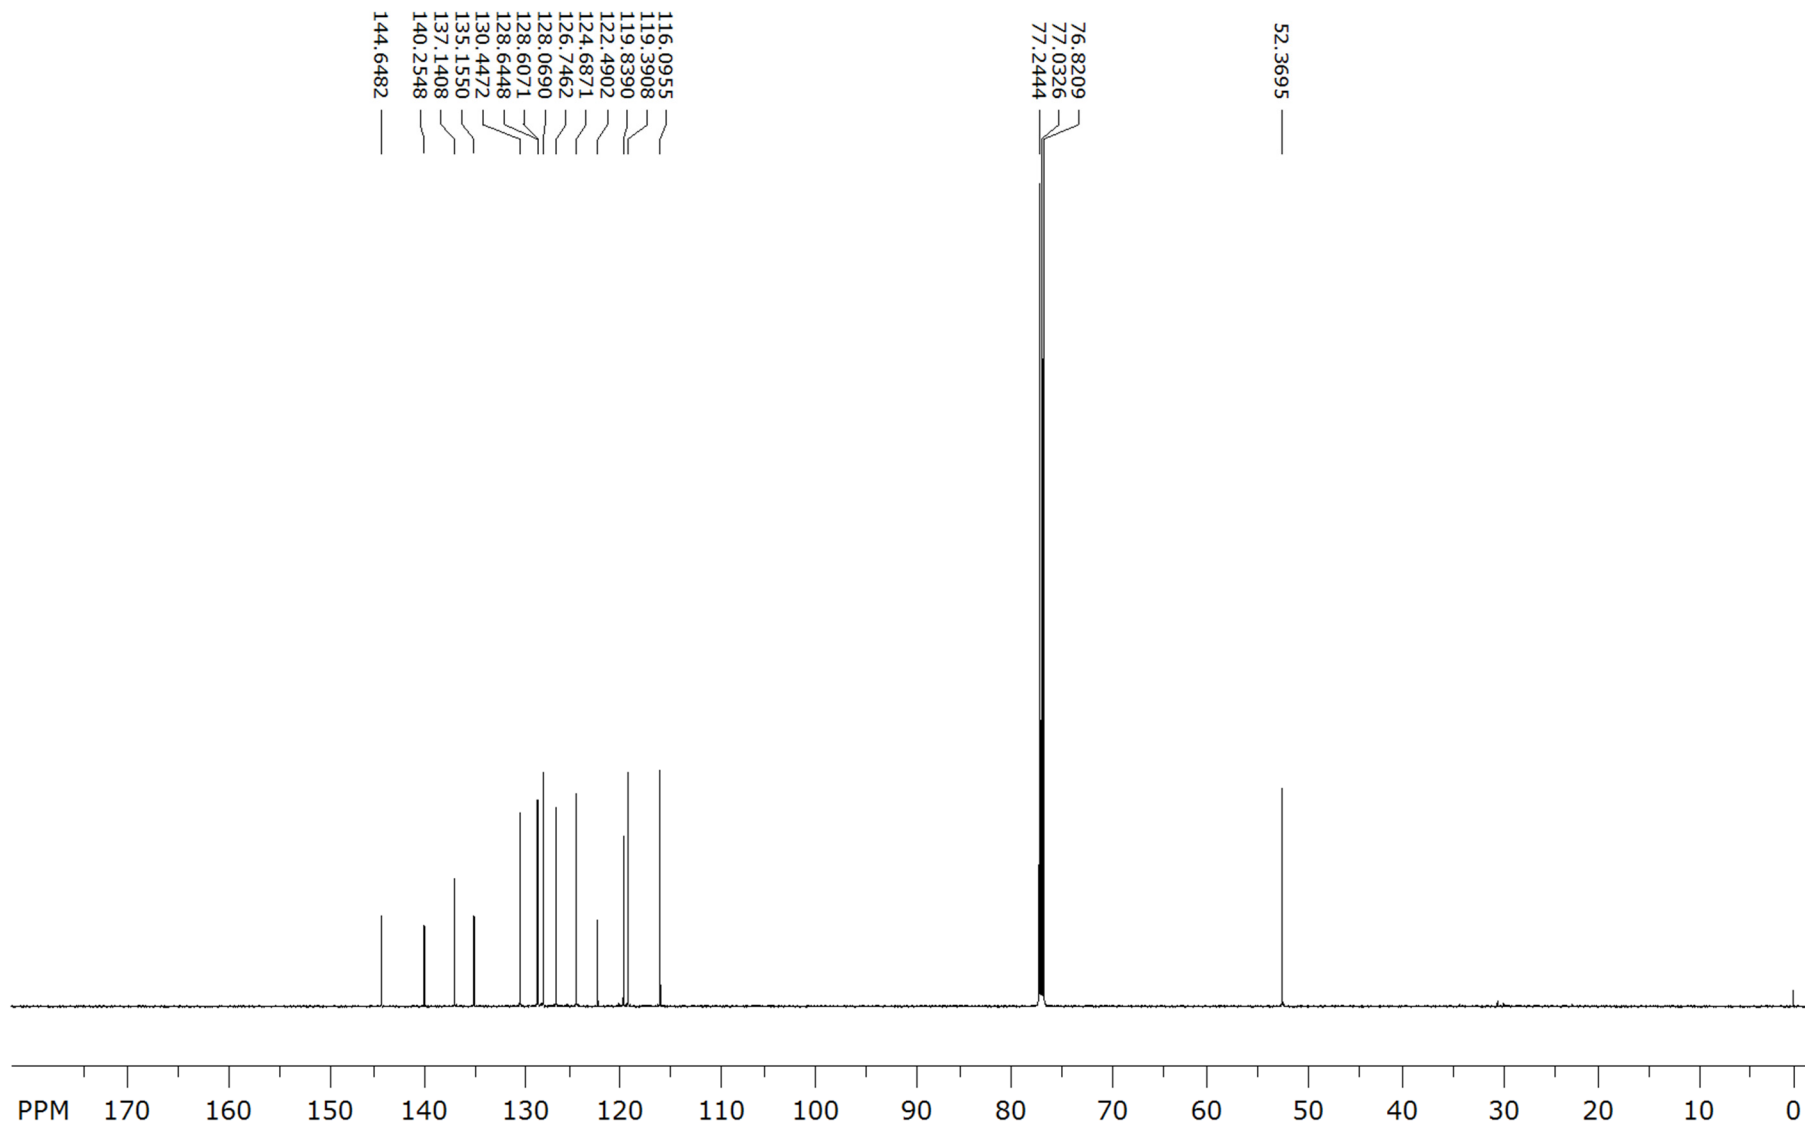

Figure S12. <sup>13</sup>C NMR (CDCl<sub>3</sub>) spectrum of **26**.

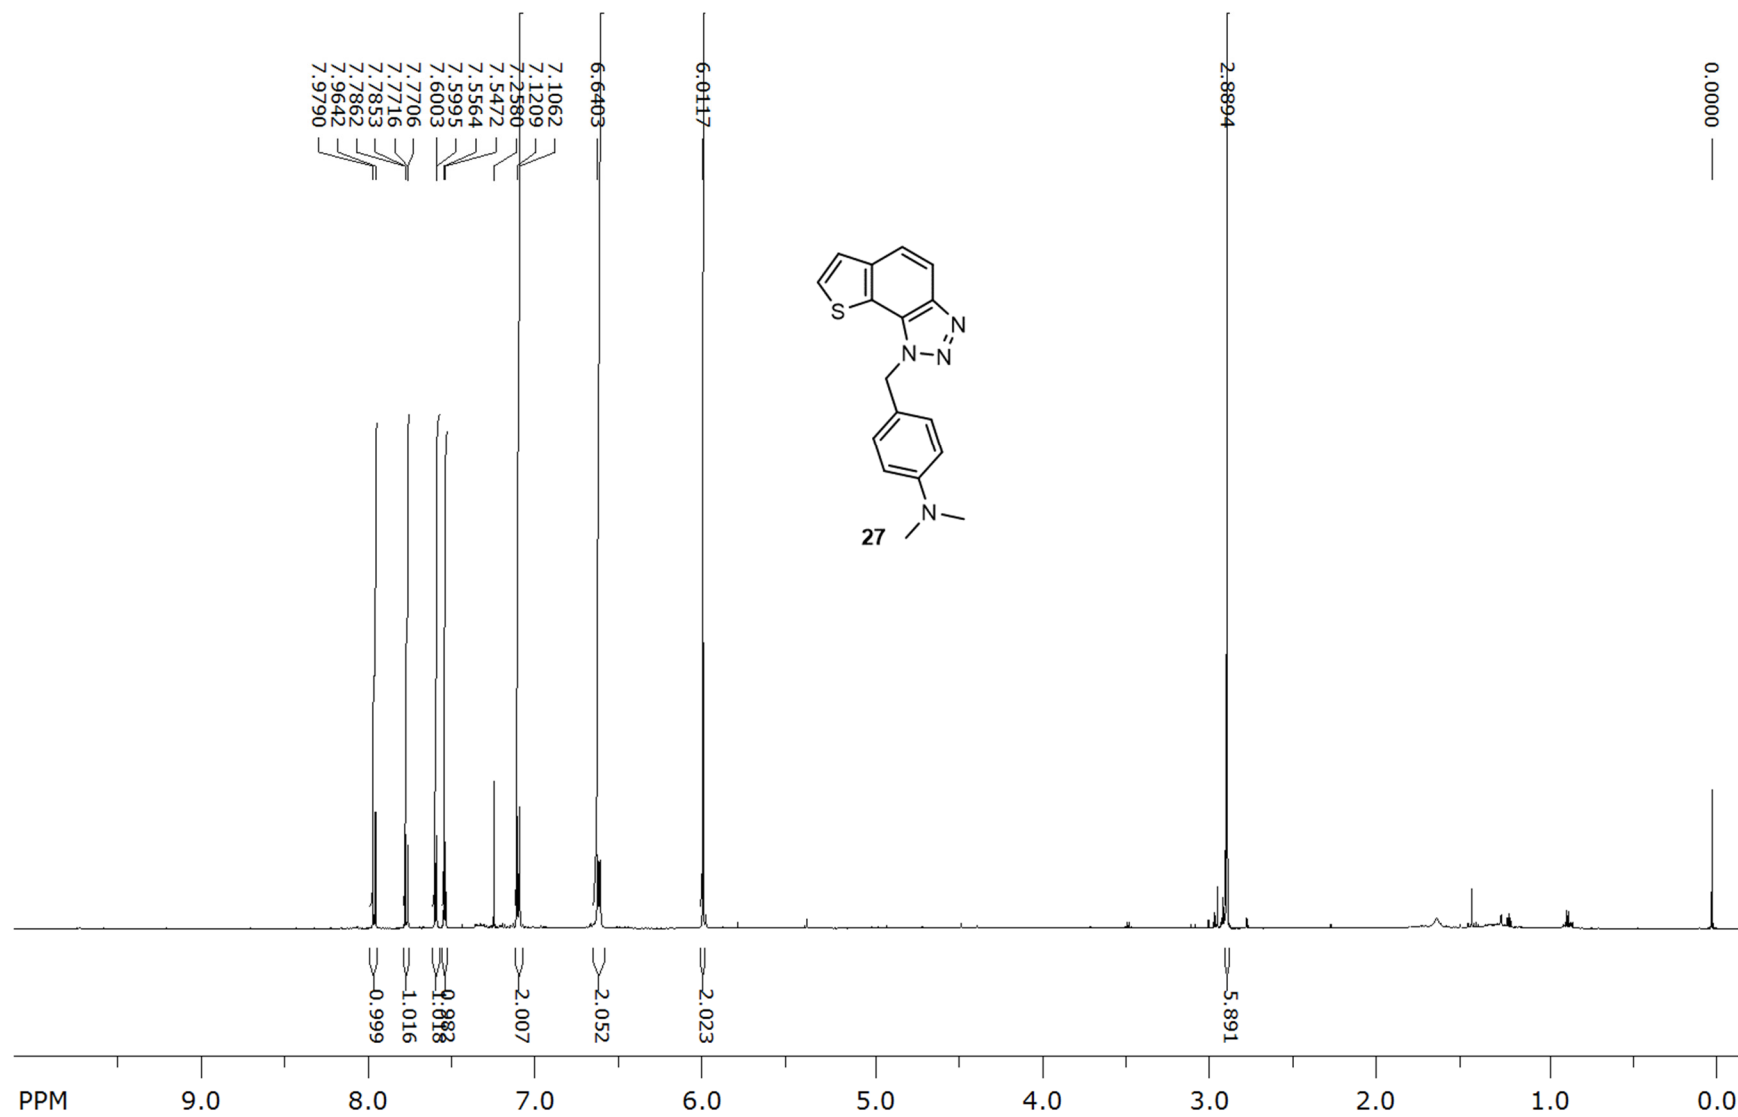

Figure S13. <sup>1</sup>H NMR (CDCl<sub>3</sub>) spectrum of **27**.

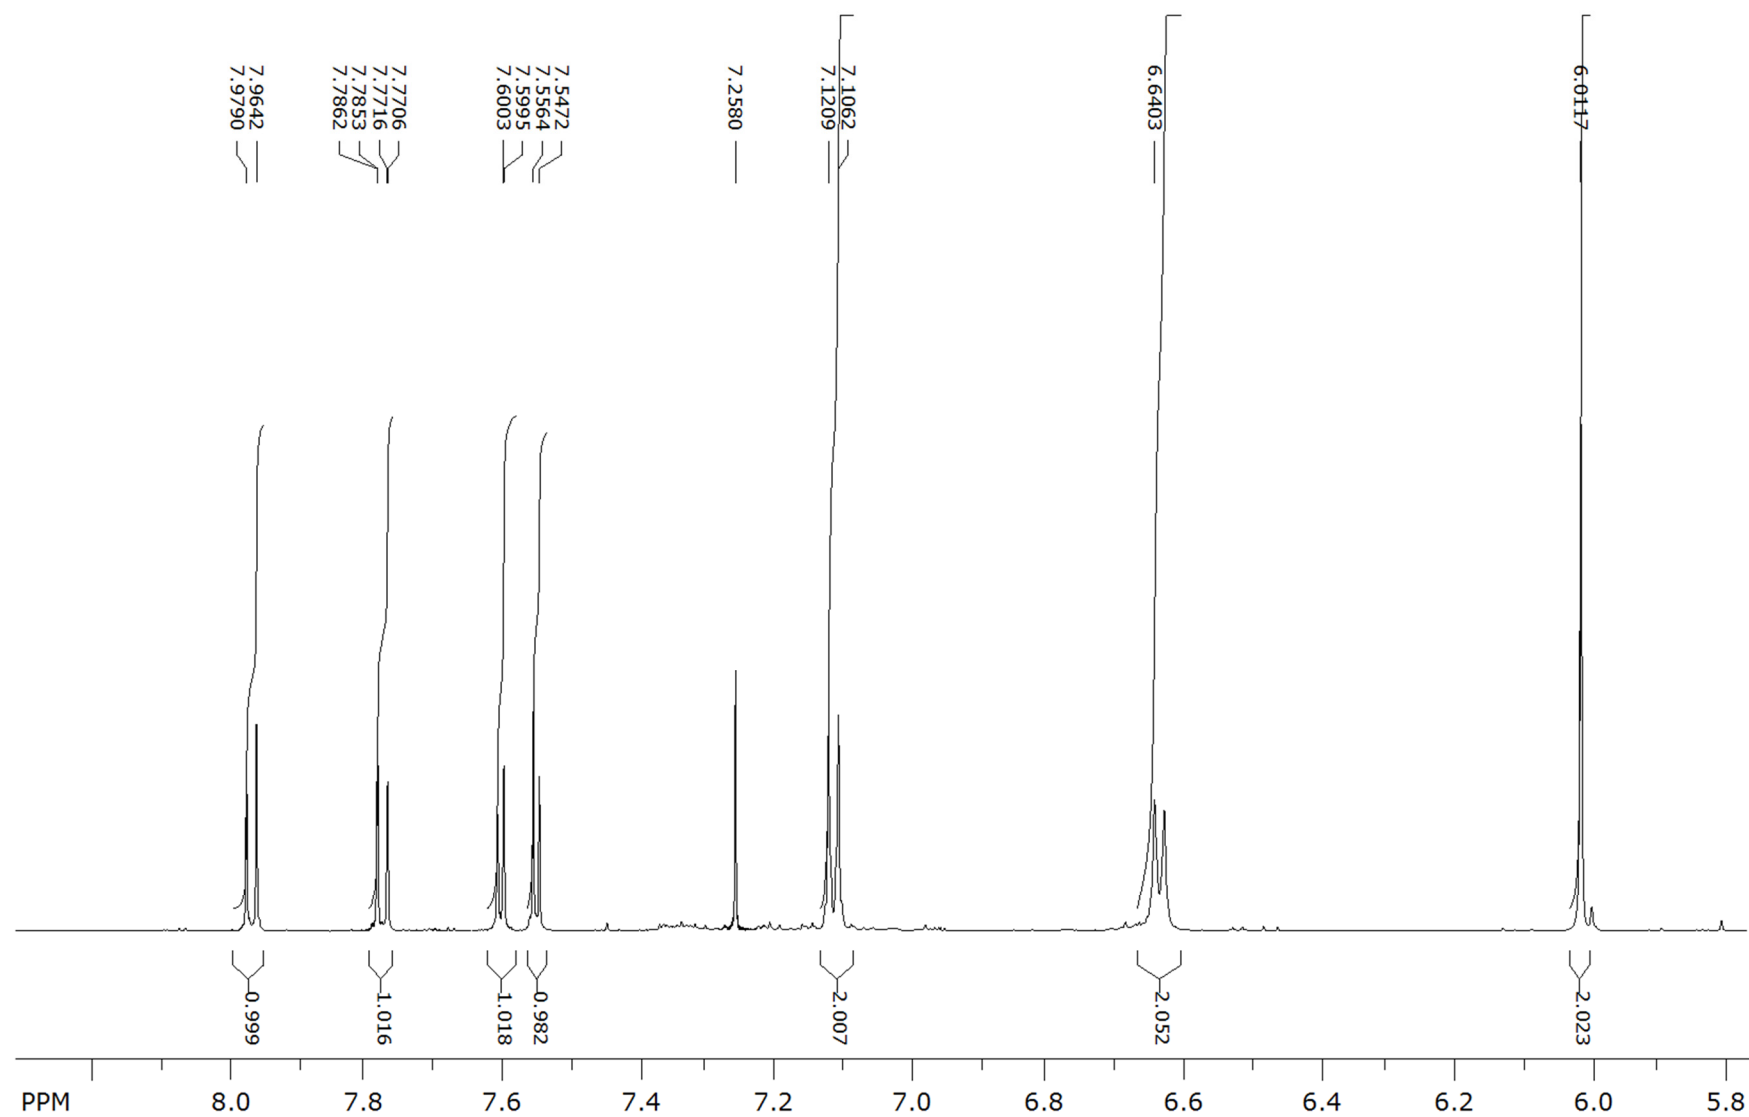

Figure S14. <sup>1</sup>H NMR (CDCl<sub>3</sub>) spectrum of aromatic part of **27**.

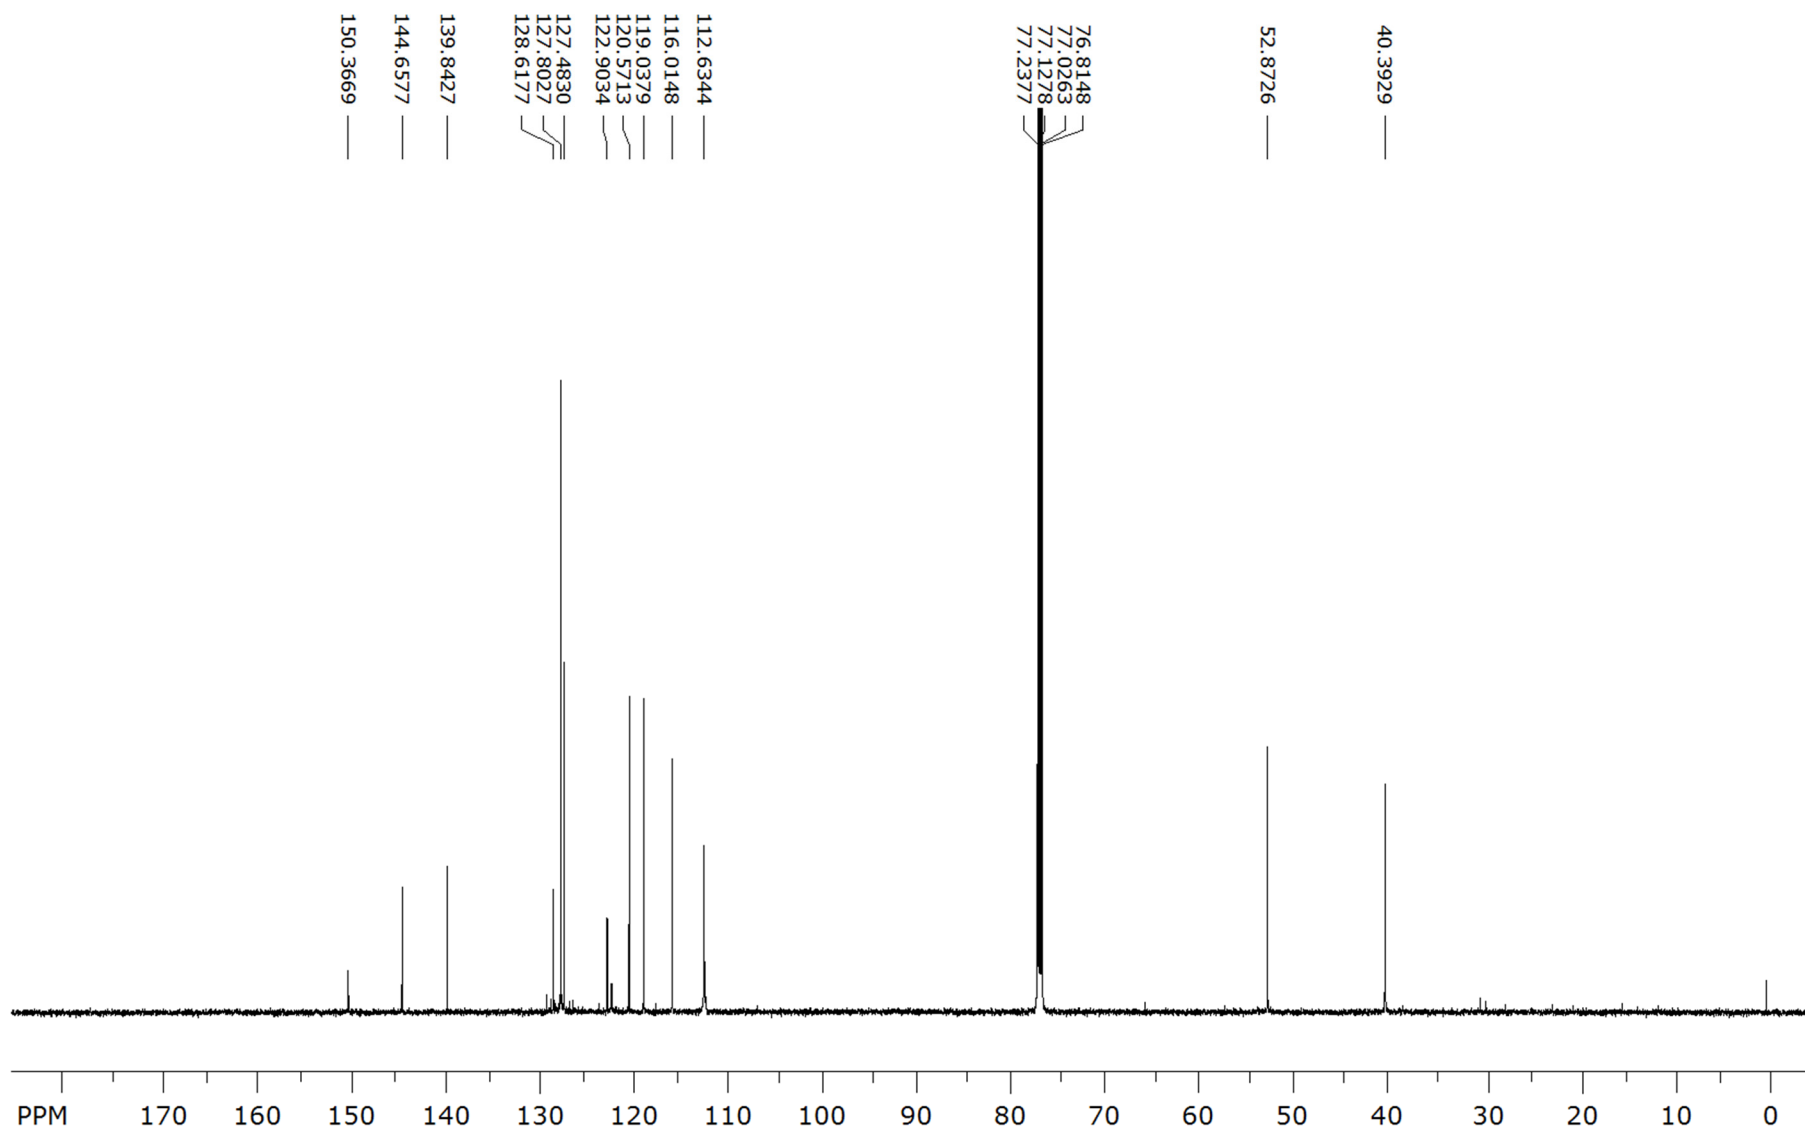

Figure S15. <sup>13</sup>C NMR (CDCl<sub>3</sub>) spectrum of **27**.

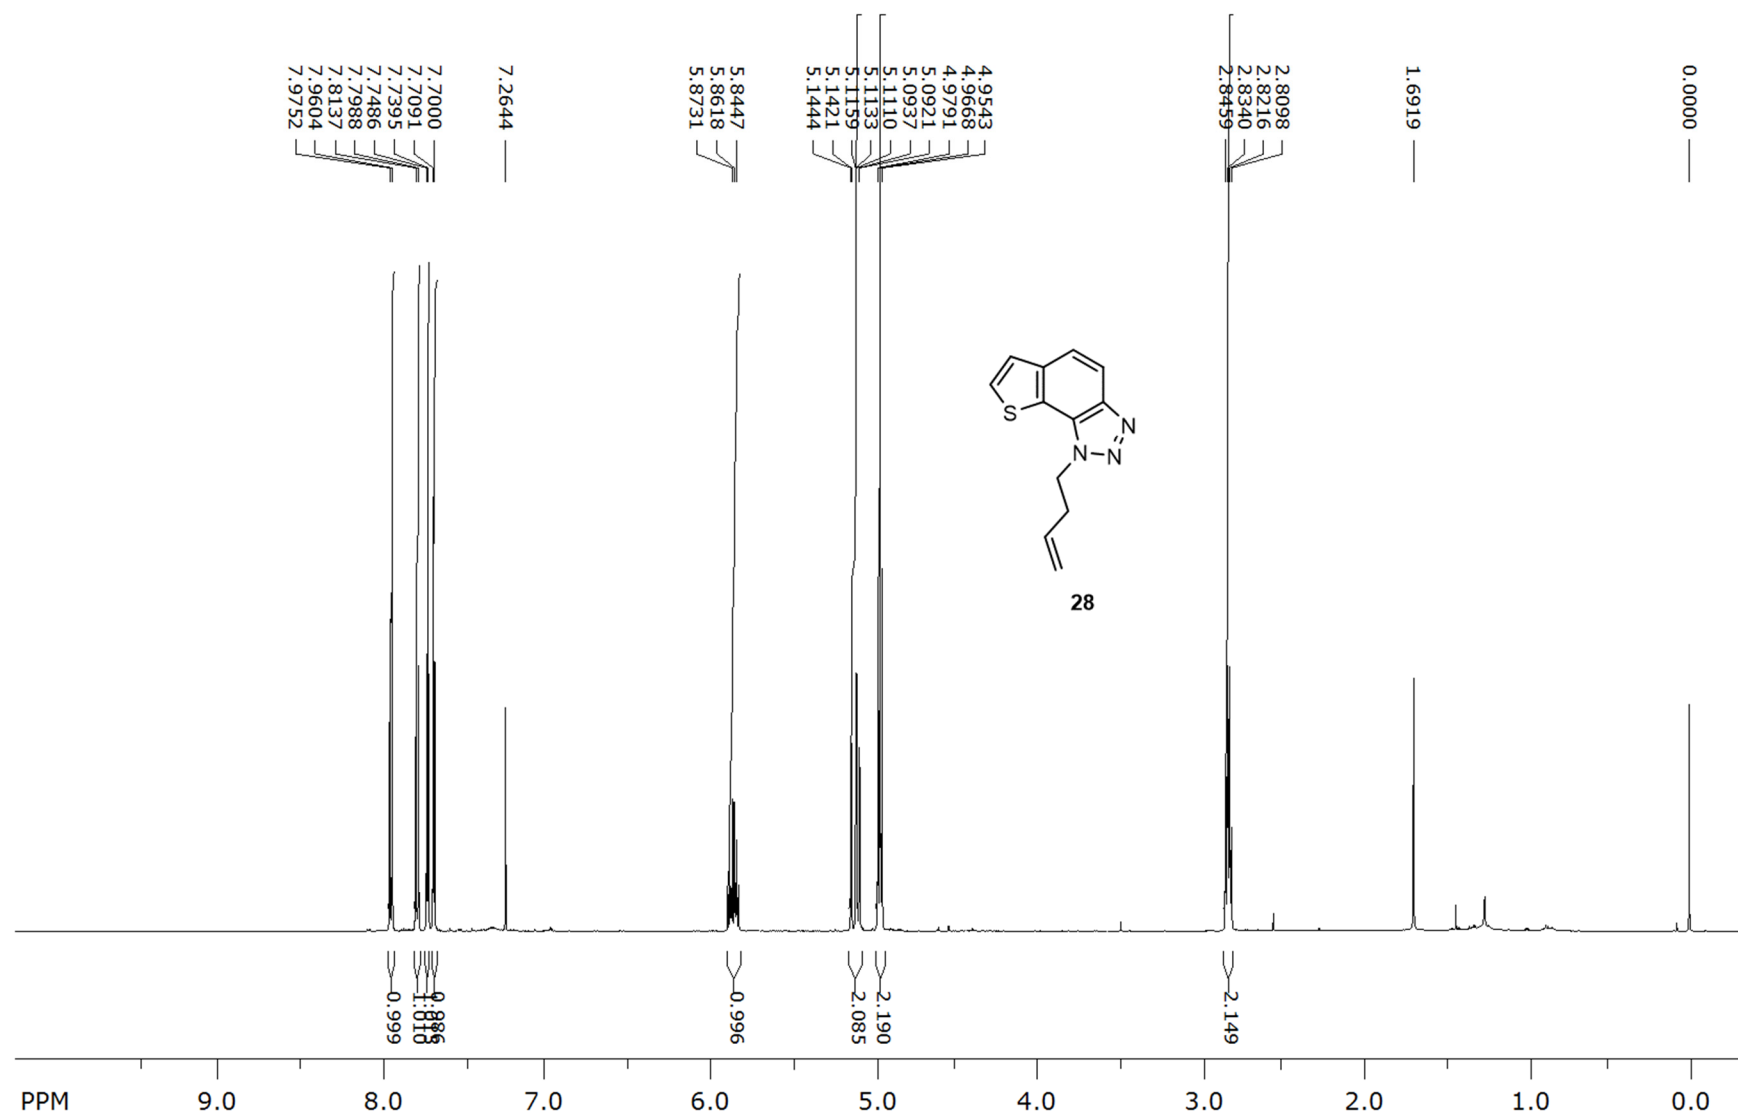

Figure S16. <sup>1</sup>H NMR (CDCl<sub>3</sub>) spectrum of **28**.

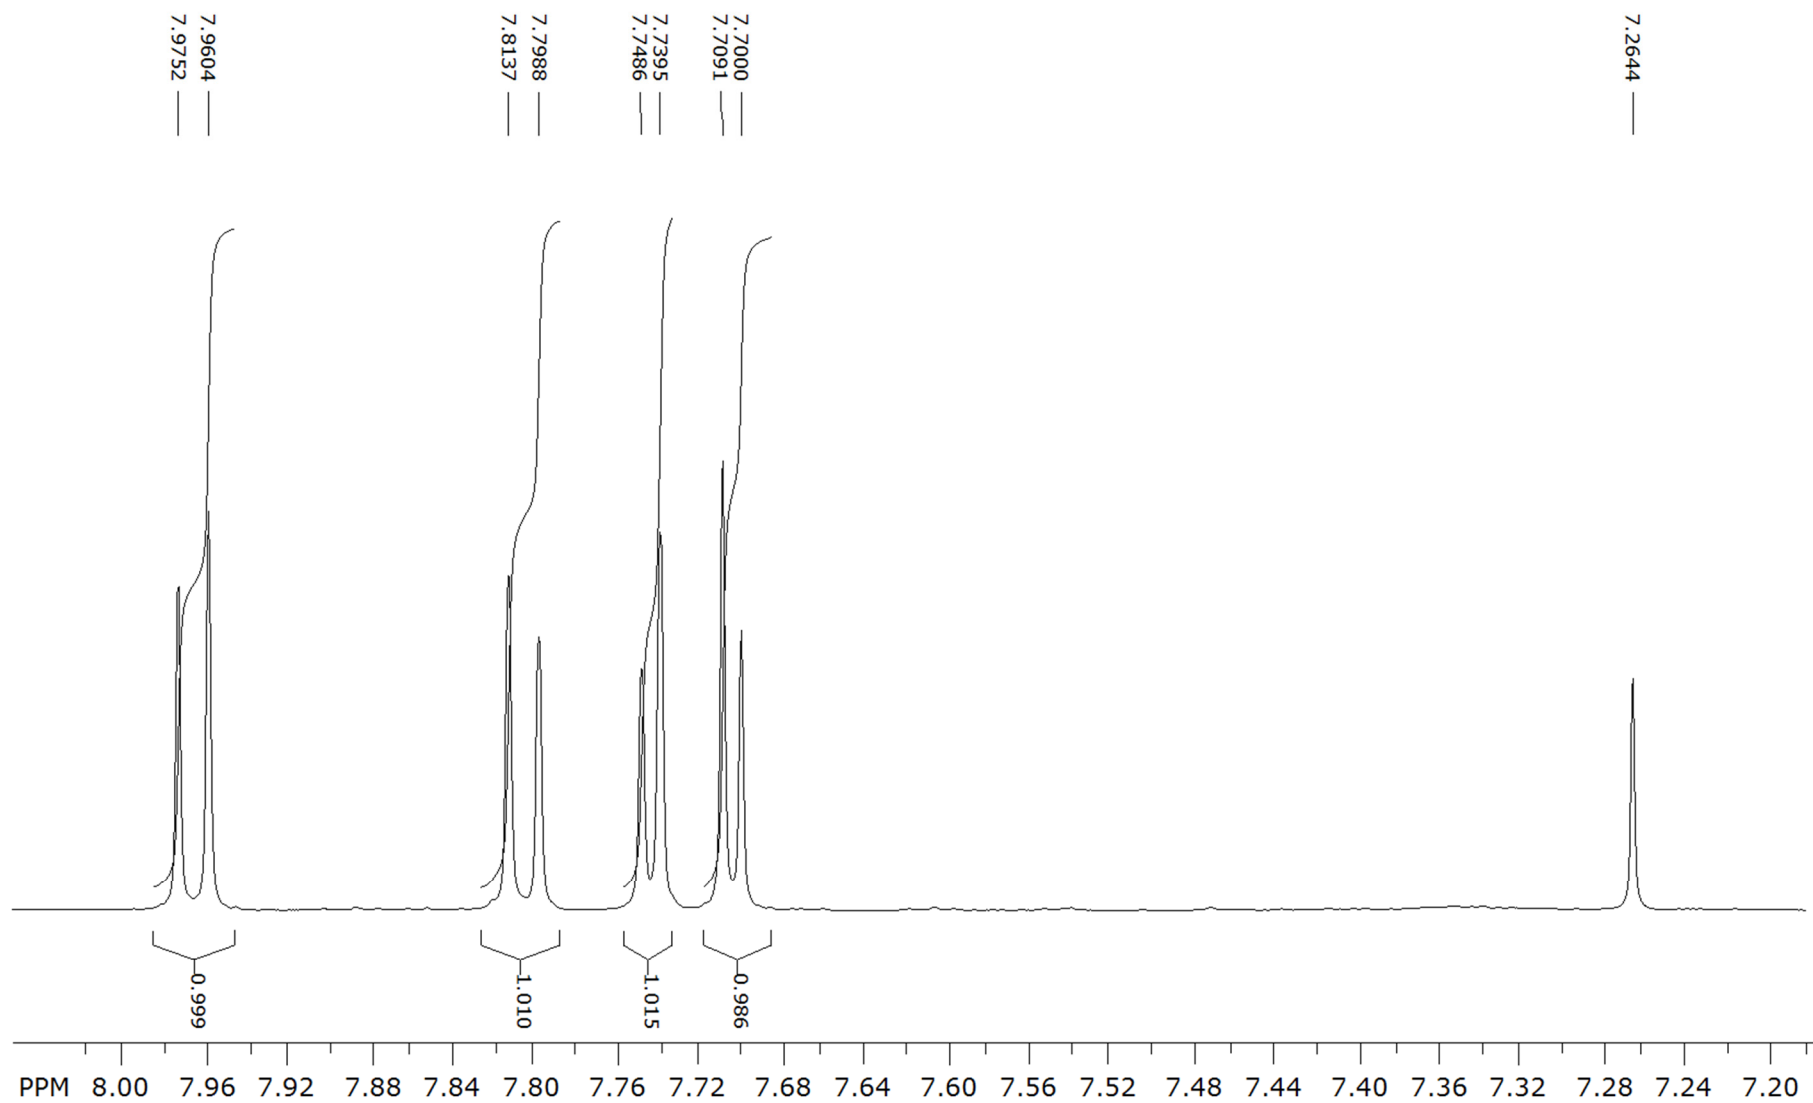

Figure S17. <sup>1</sup>H NMR (CDCl<sub>3</sub>) spectrum of aromatic part of **28**.

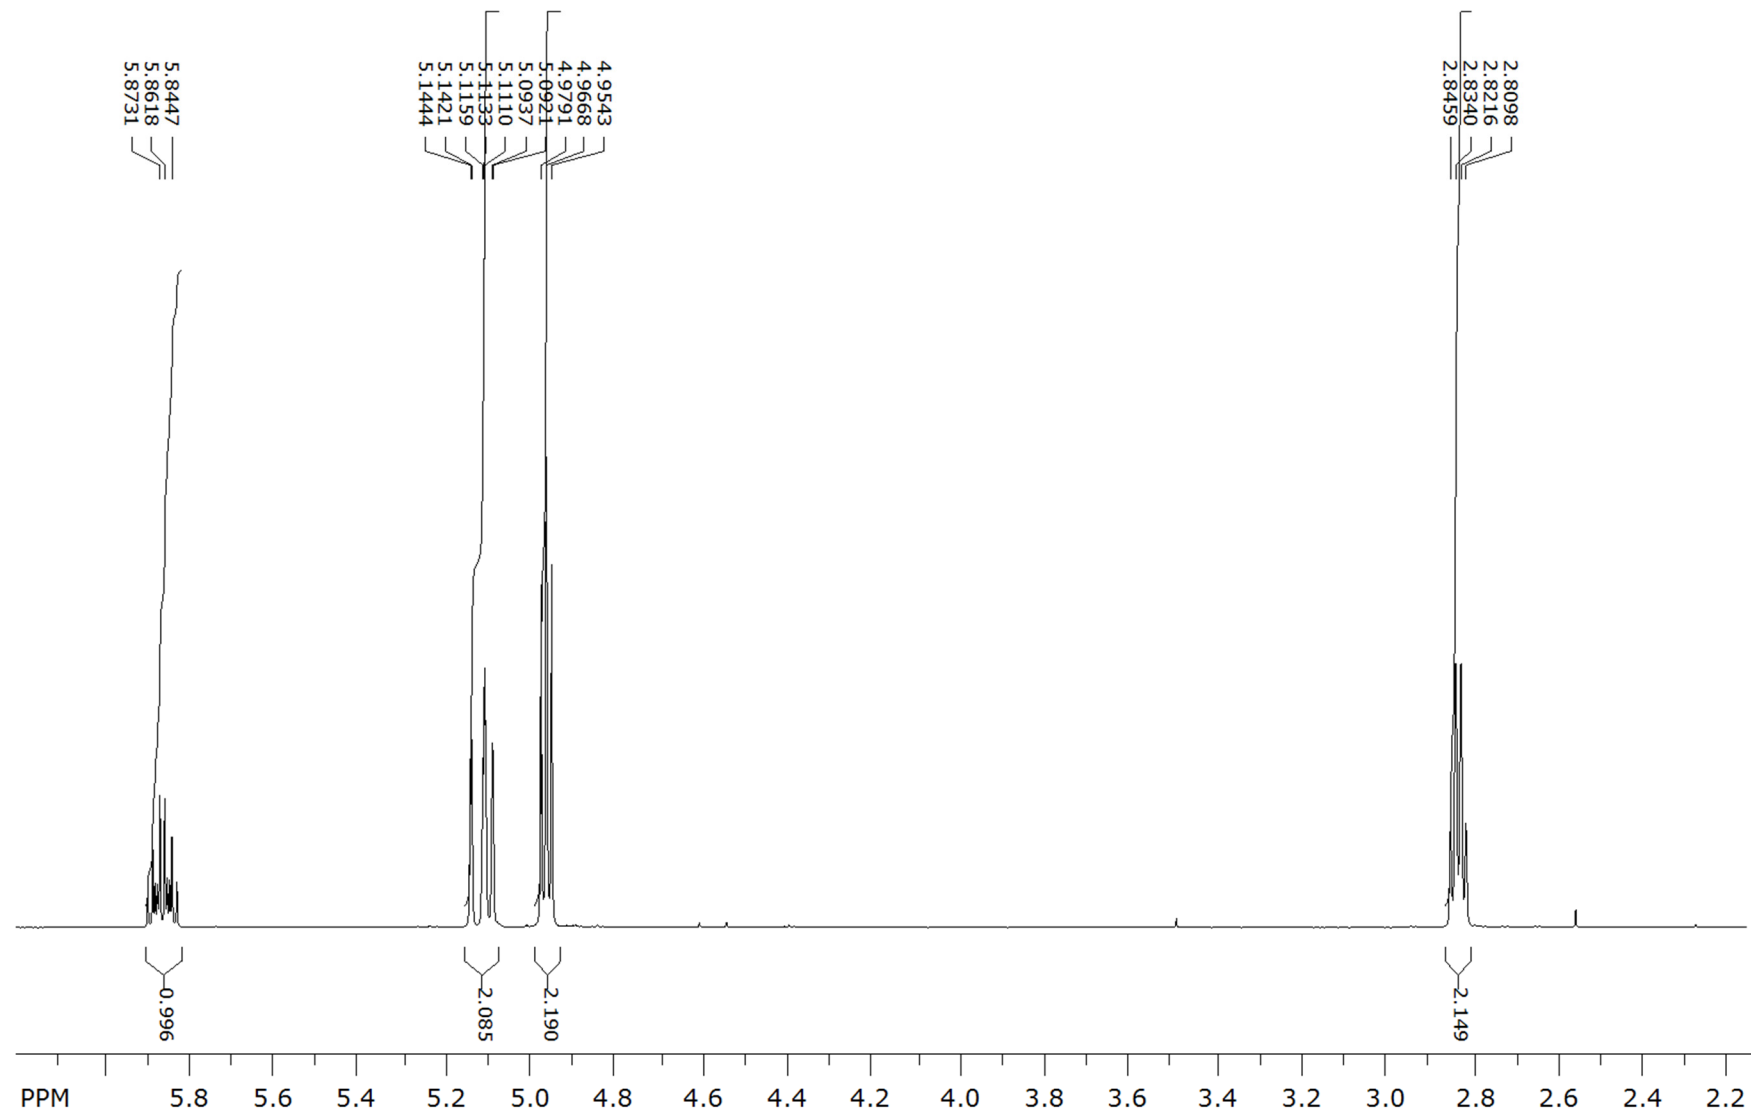

Figure S18.  $^1\text{H}$  NMR ( $\text{CDCl}_3$ ) spectrum of aliphatic part of **28**.

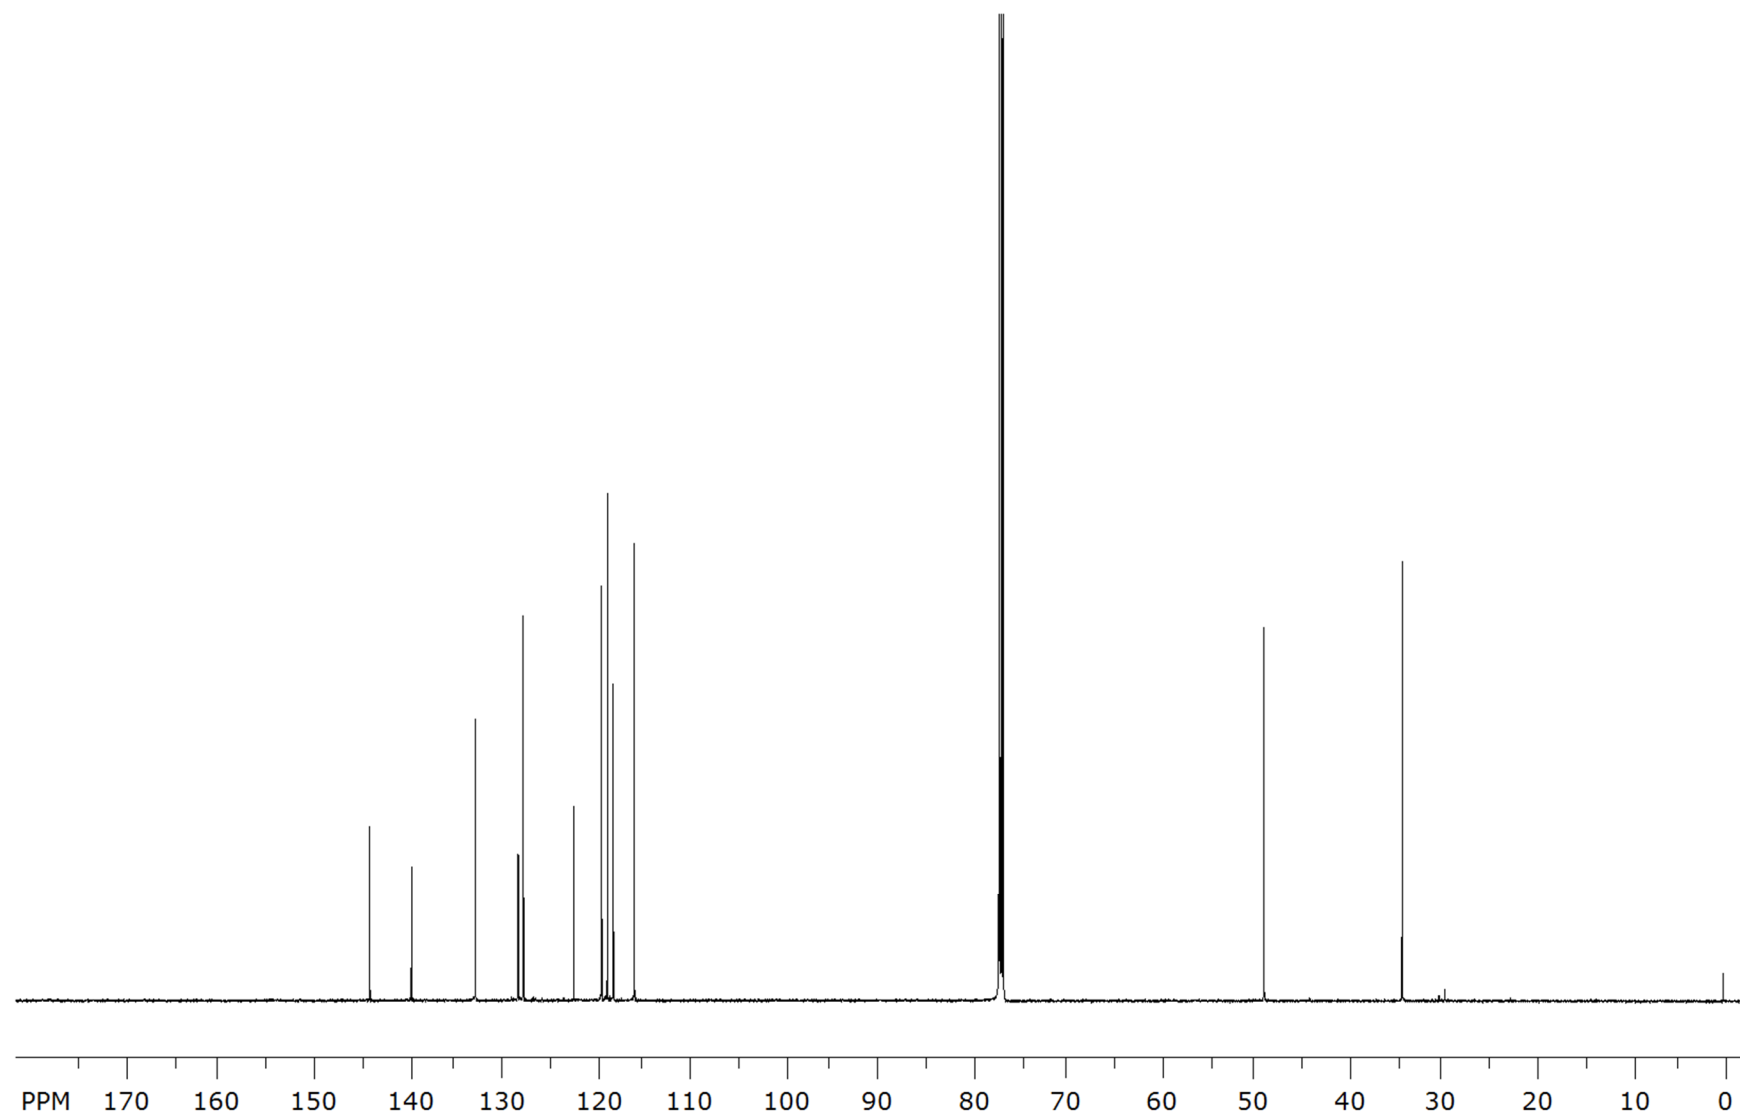

Figure S19.  $^{13}\text{C}$  NMR ( $\text{CDCl}_3$ ) spectrum of **28** (*Spin Works 3.0*).



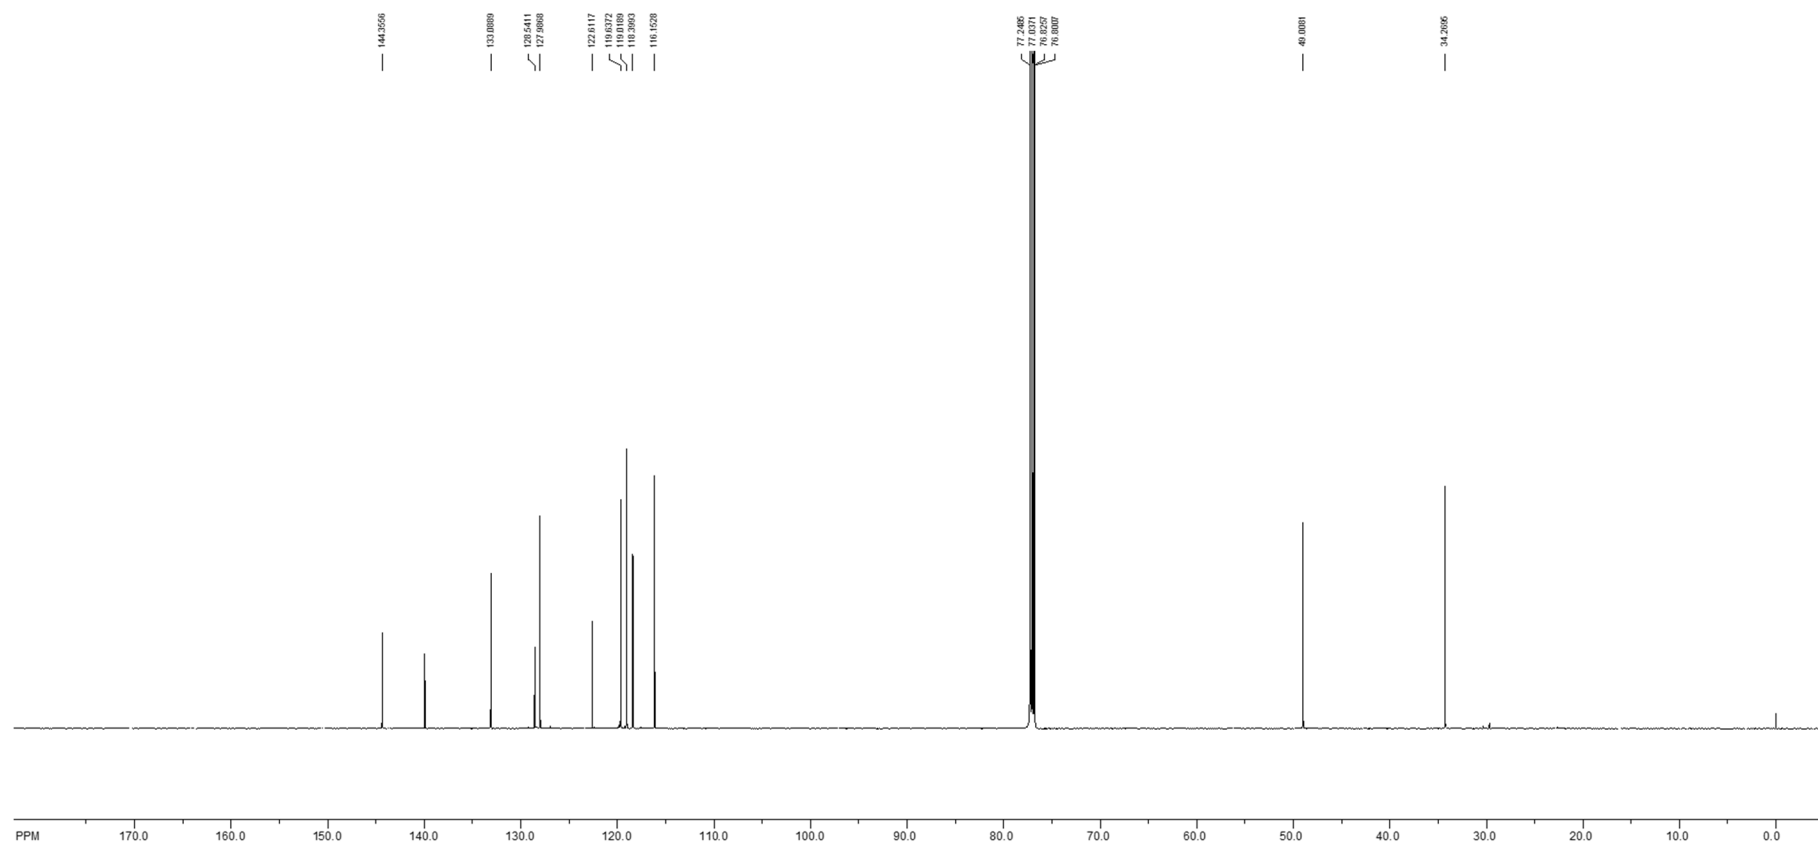

Figure S20.  $^{13}\text{C}$  NMR ( $\text{CDCl}_3$ ) spectrum of **28** (*Spin Works 2.5.5.*).

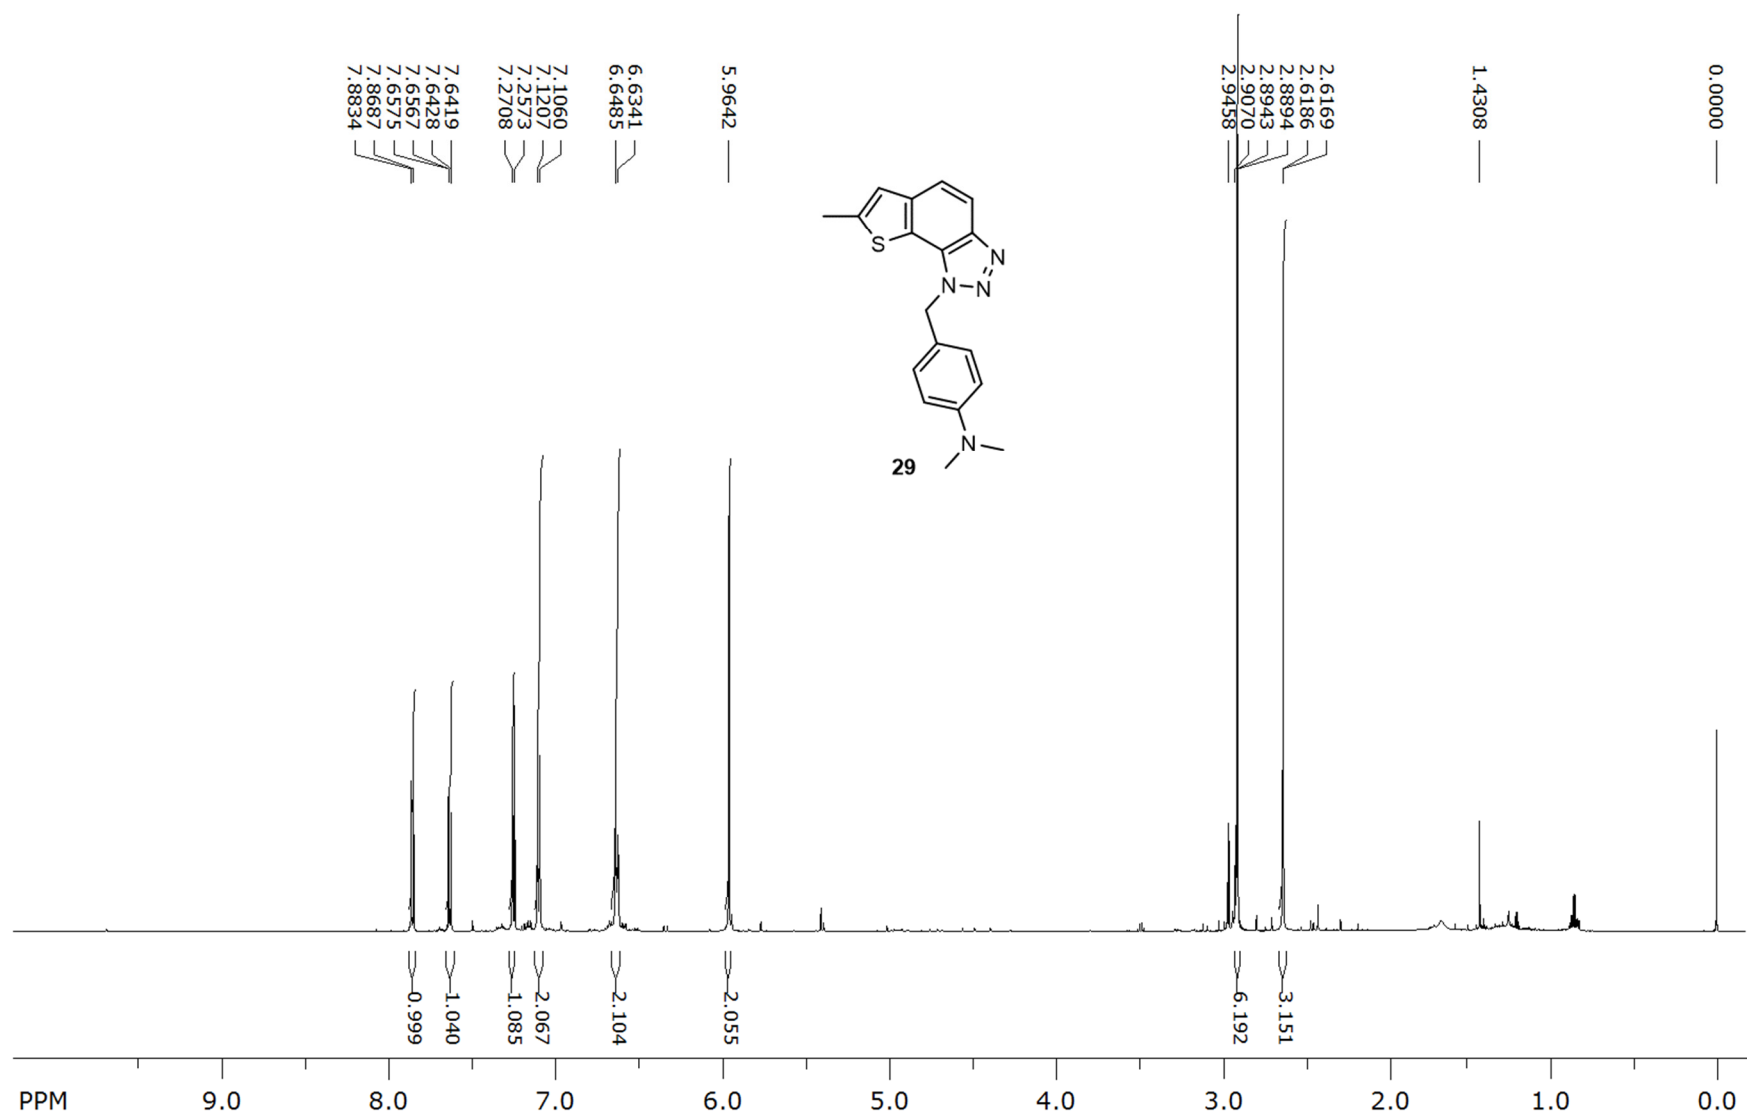

Figure S21. <sup>1</sup>H NMR (CDCl<sub>3</sub>) spectrum of **29**.

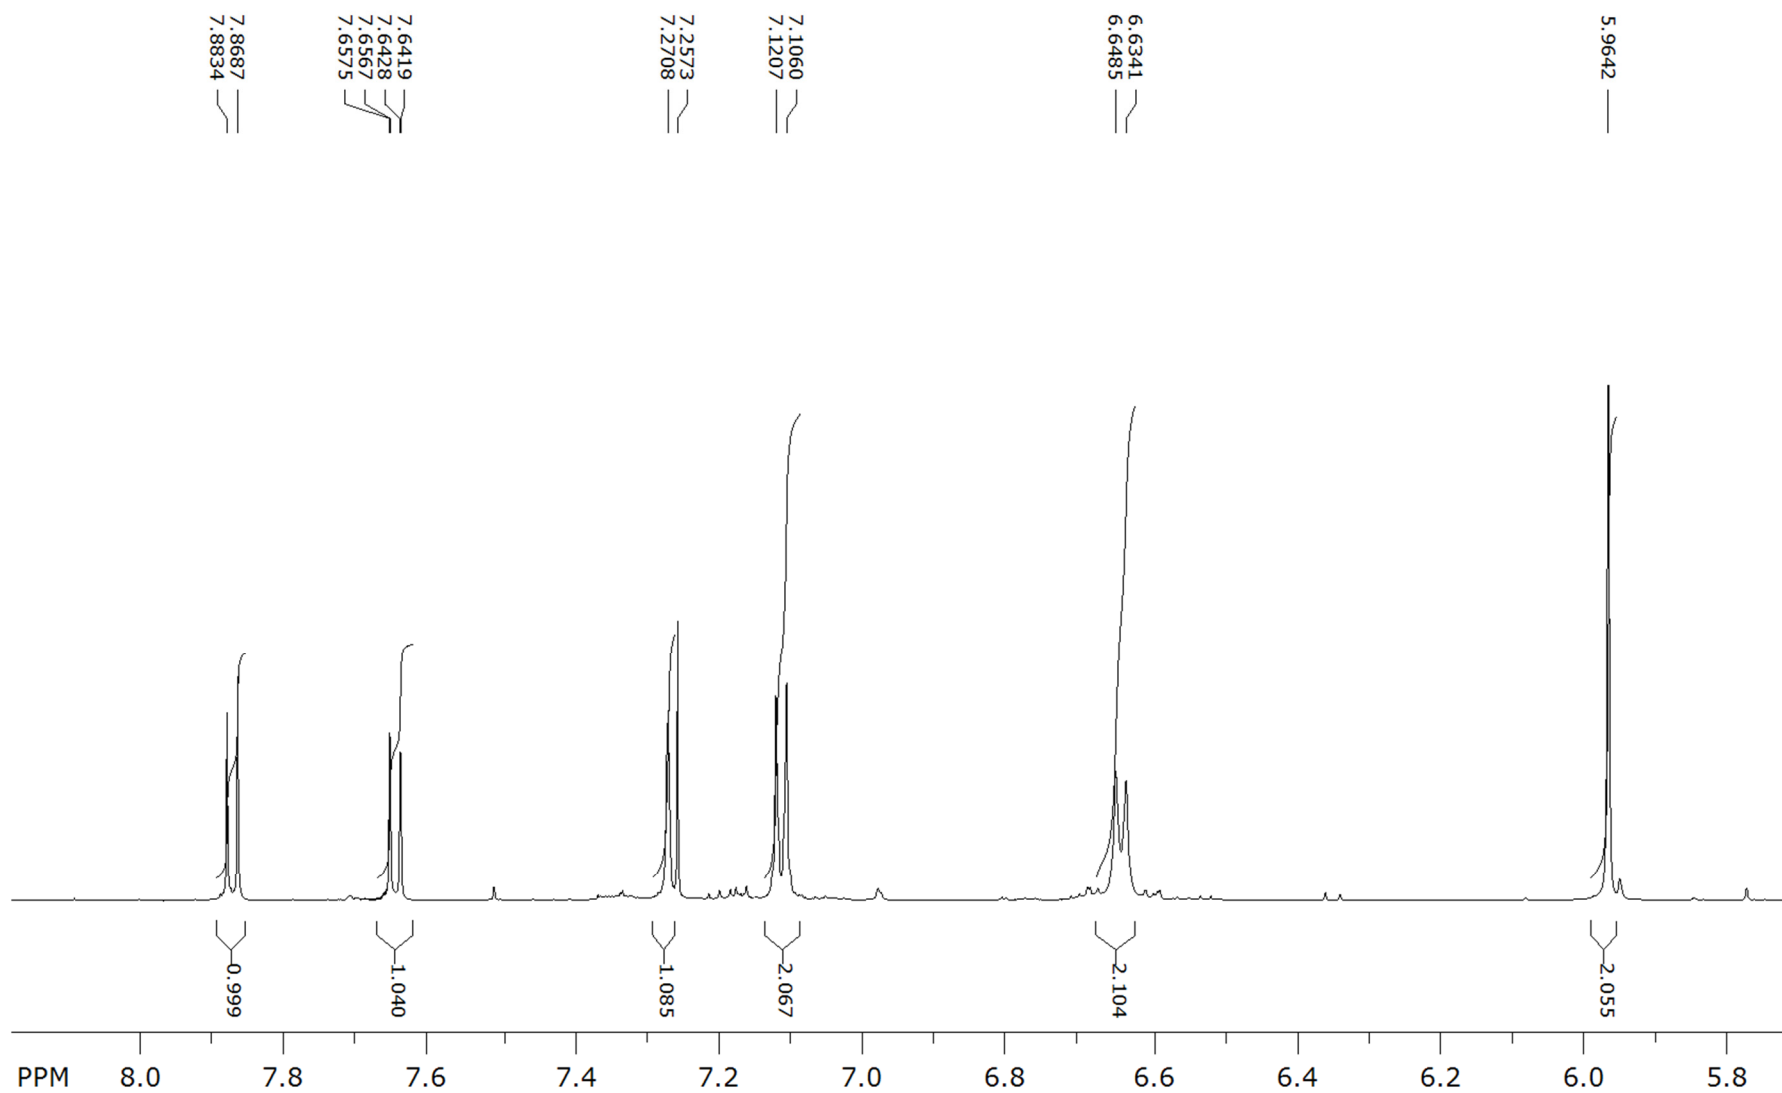

Figure S22. <sup>1</sup>H NMR (CDCl<sub>3</sub>) spectrum of aromatic part of **29**.

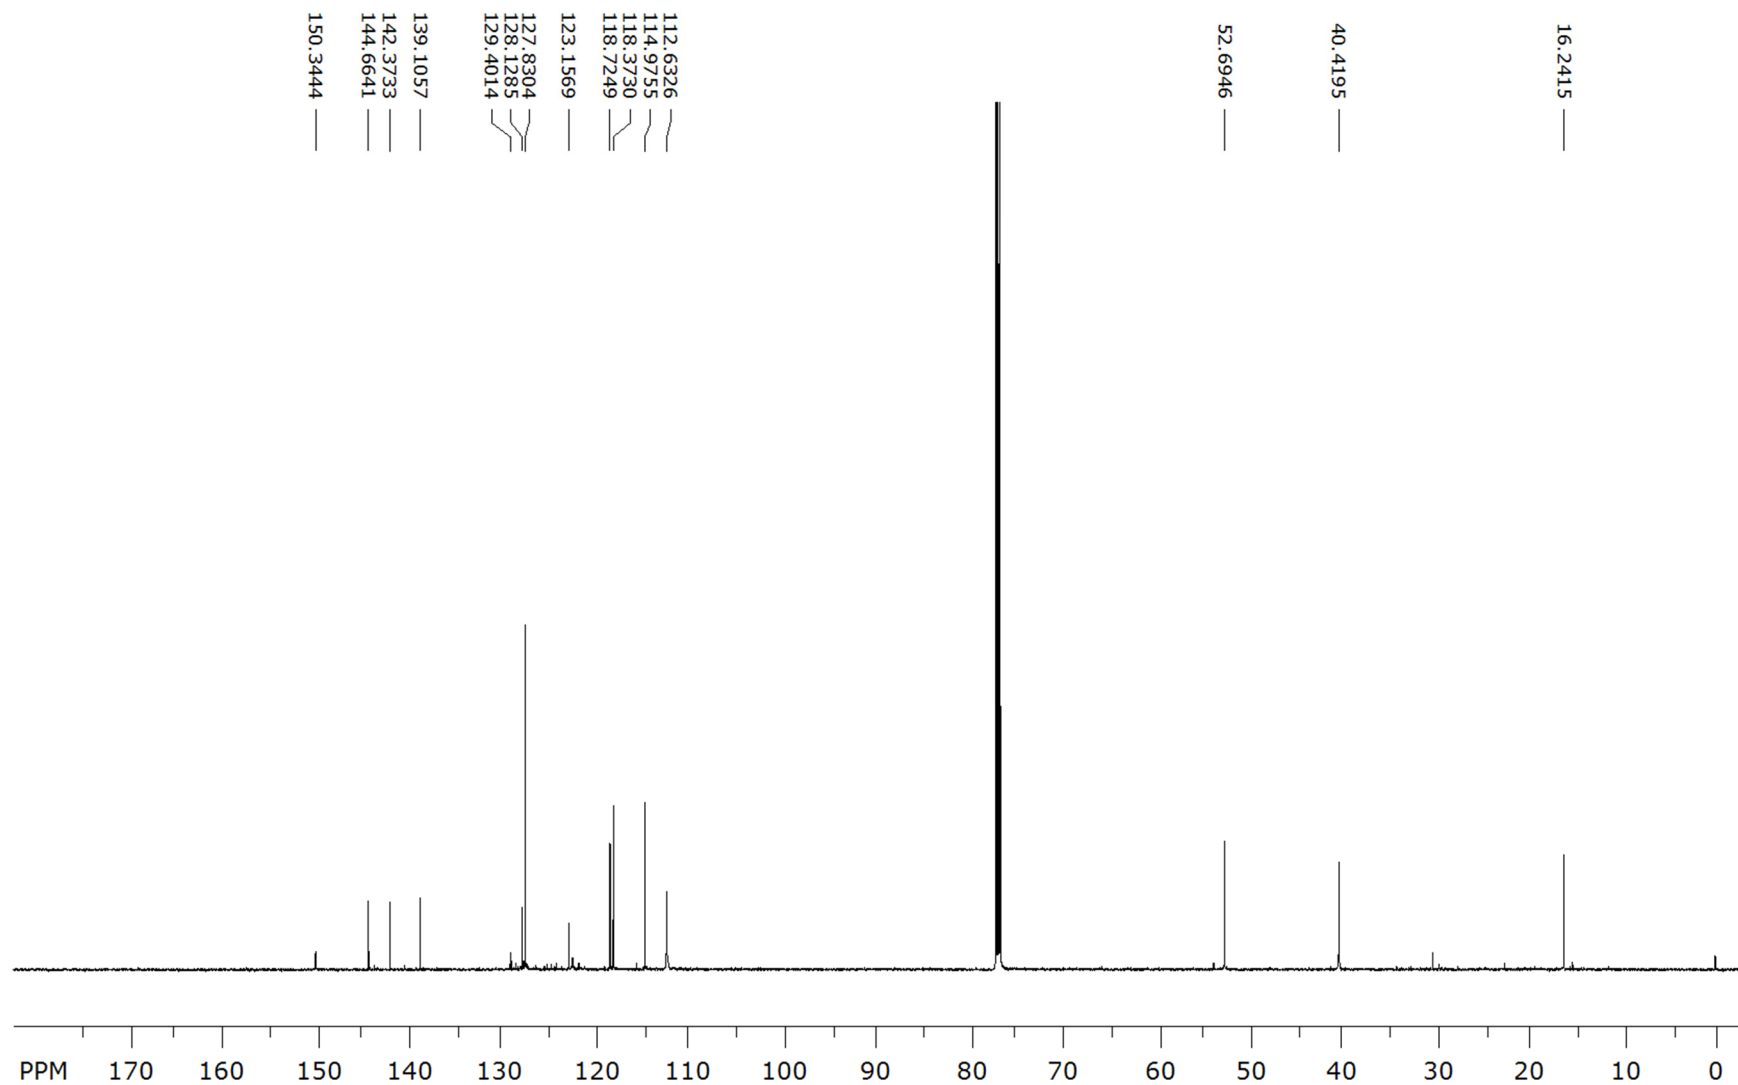

Figure S23.  $^{13}\text{C}$  NMR ( $\text{CDCl}_3$ ) spectrum of **29**.

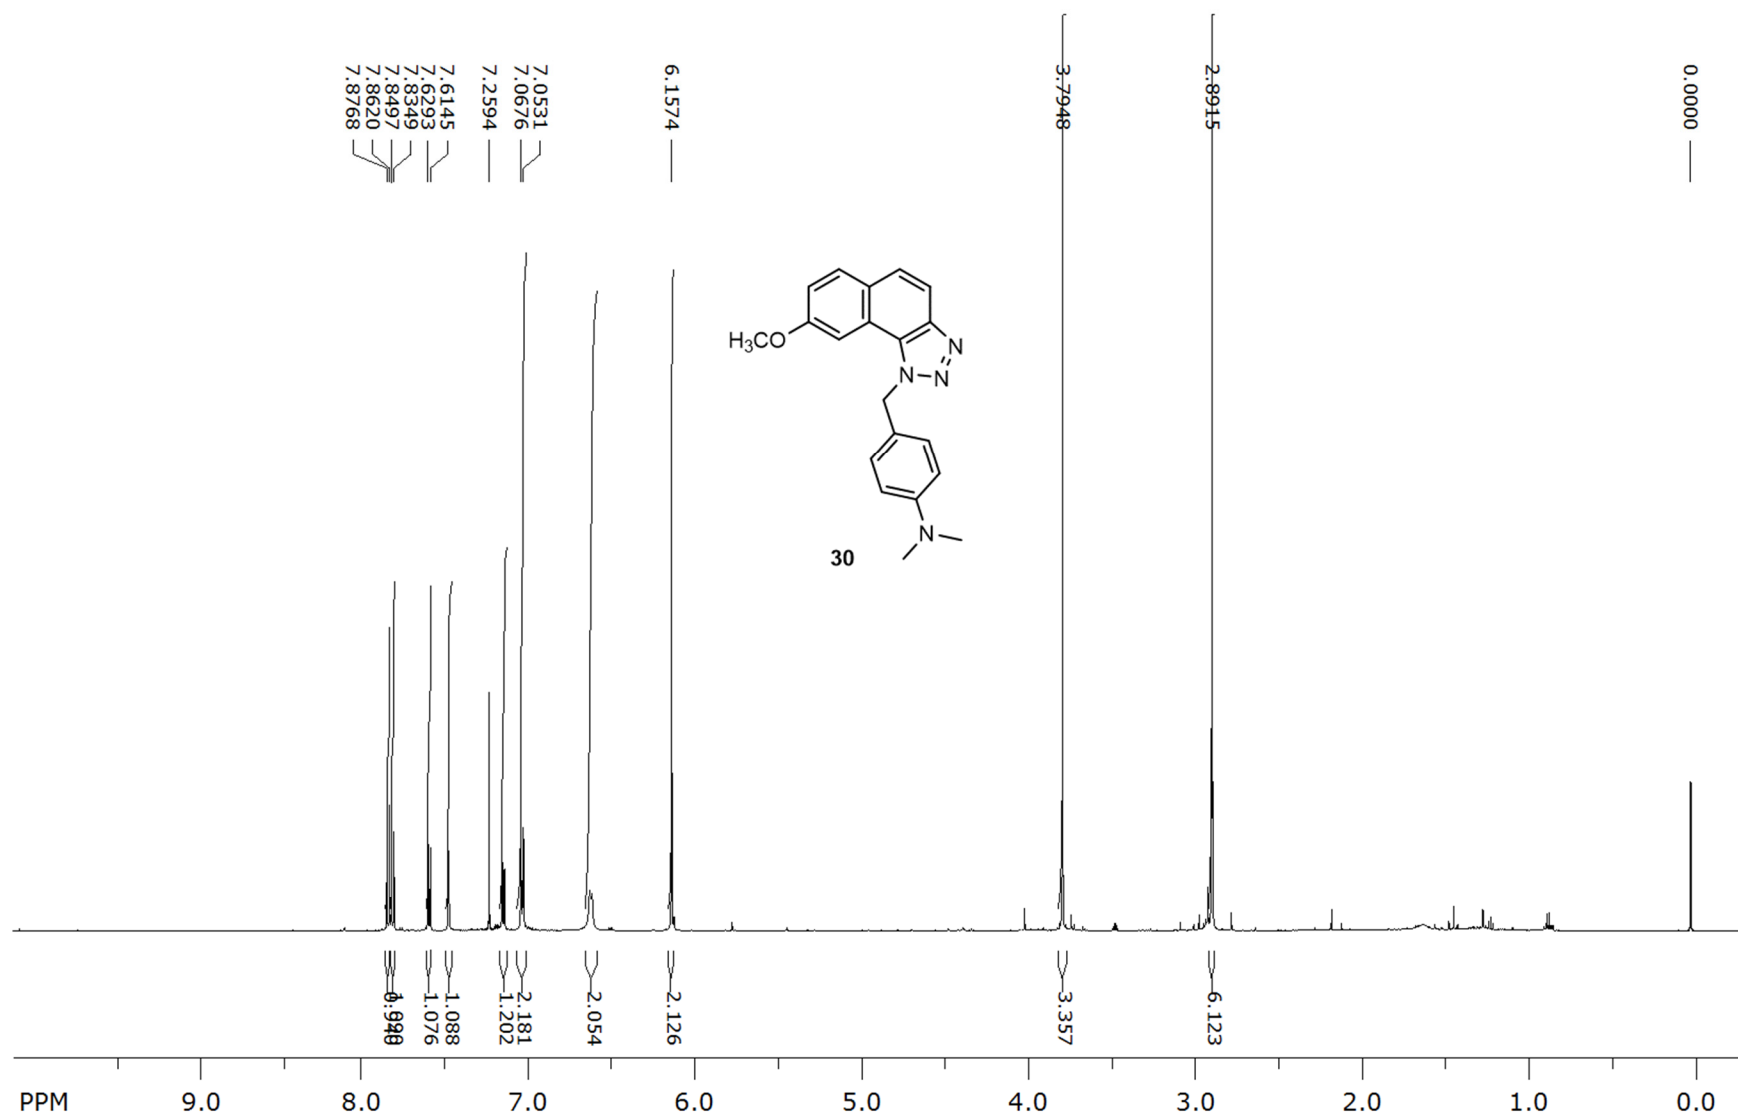

Figure S24. <sup>1</sup>H NMR (CDCl<sub>3</sub>) spectrum of **30**.

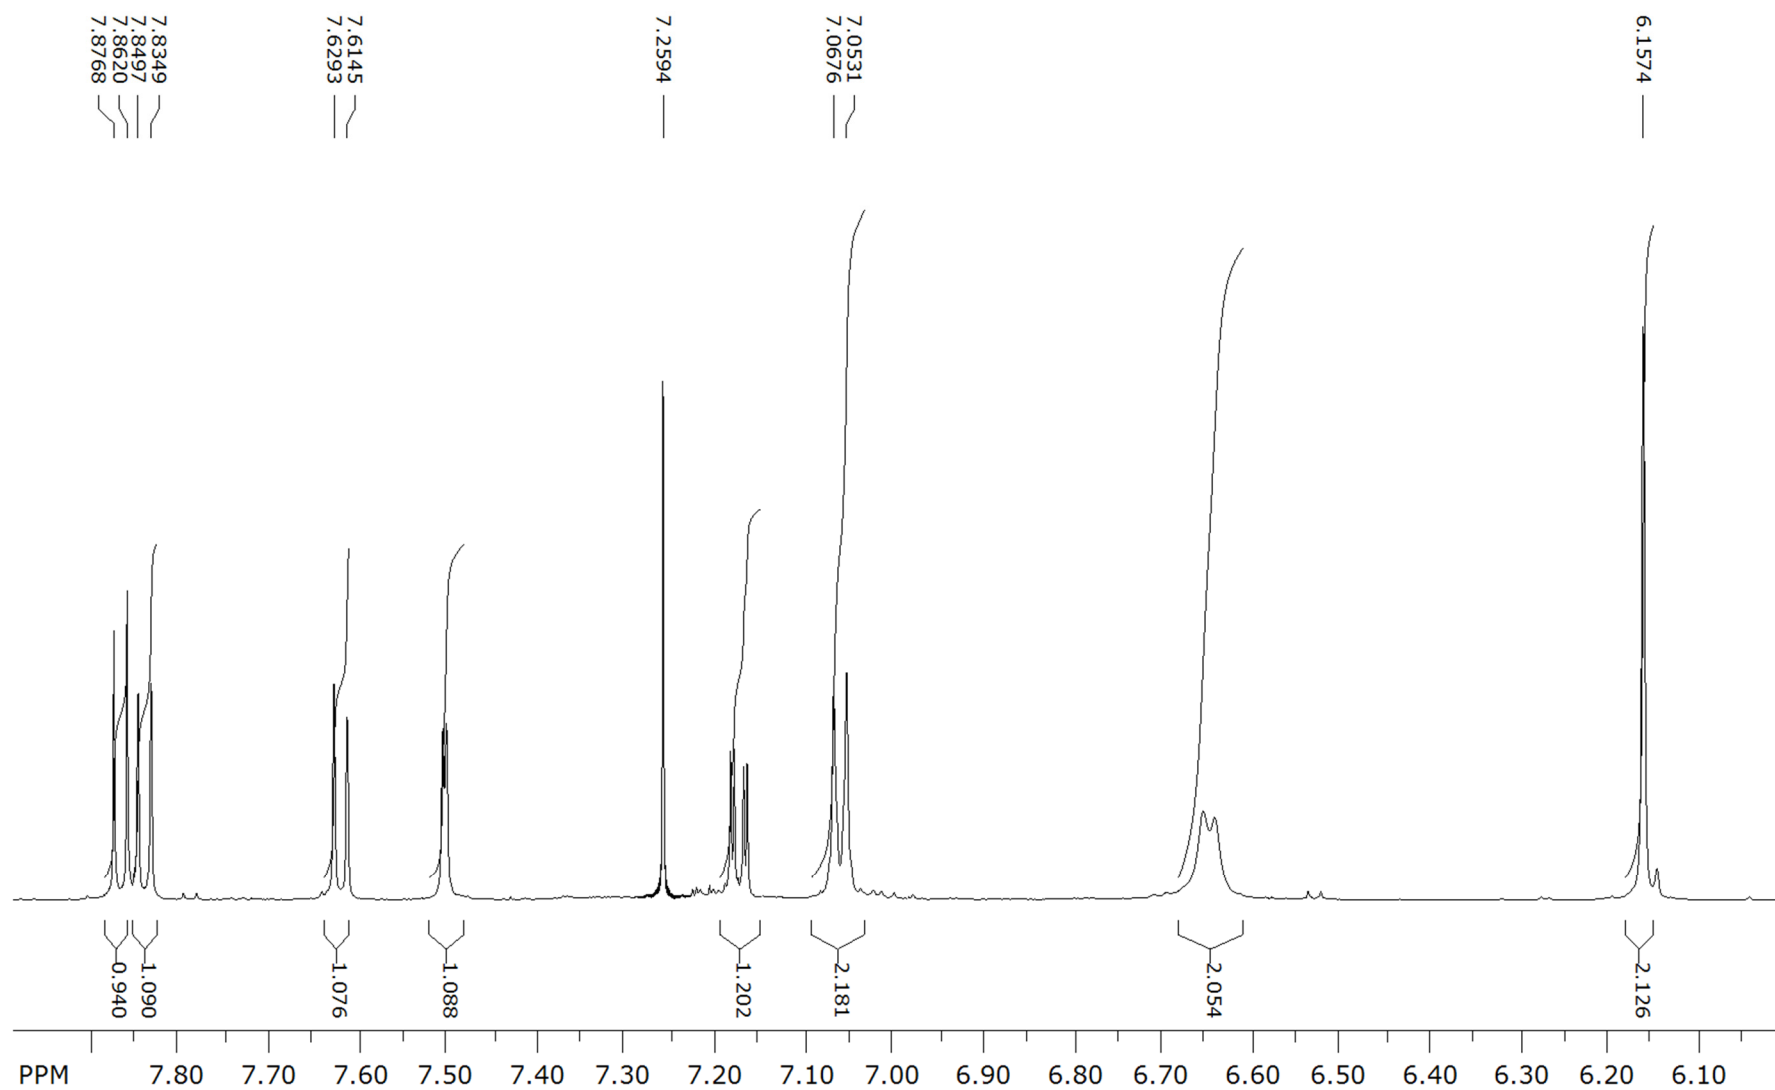

Figure S25. <sup>1</sup>H NMR (CDCl<sub>3</sub>) spectrum of aromatic part of **30**.

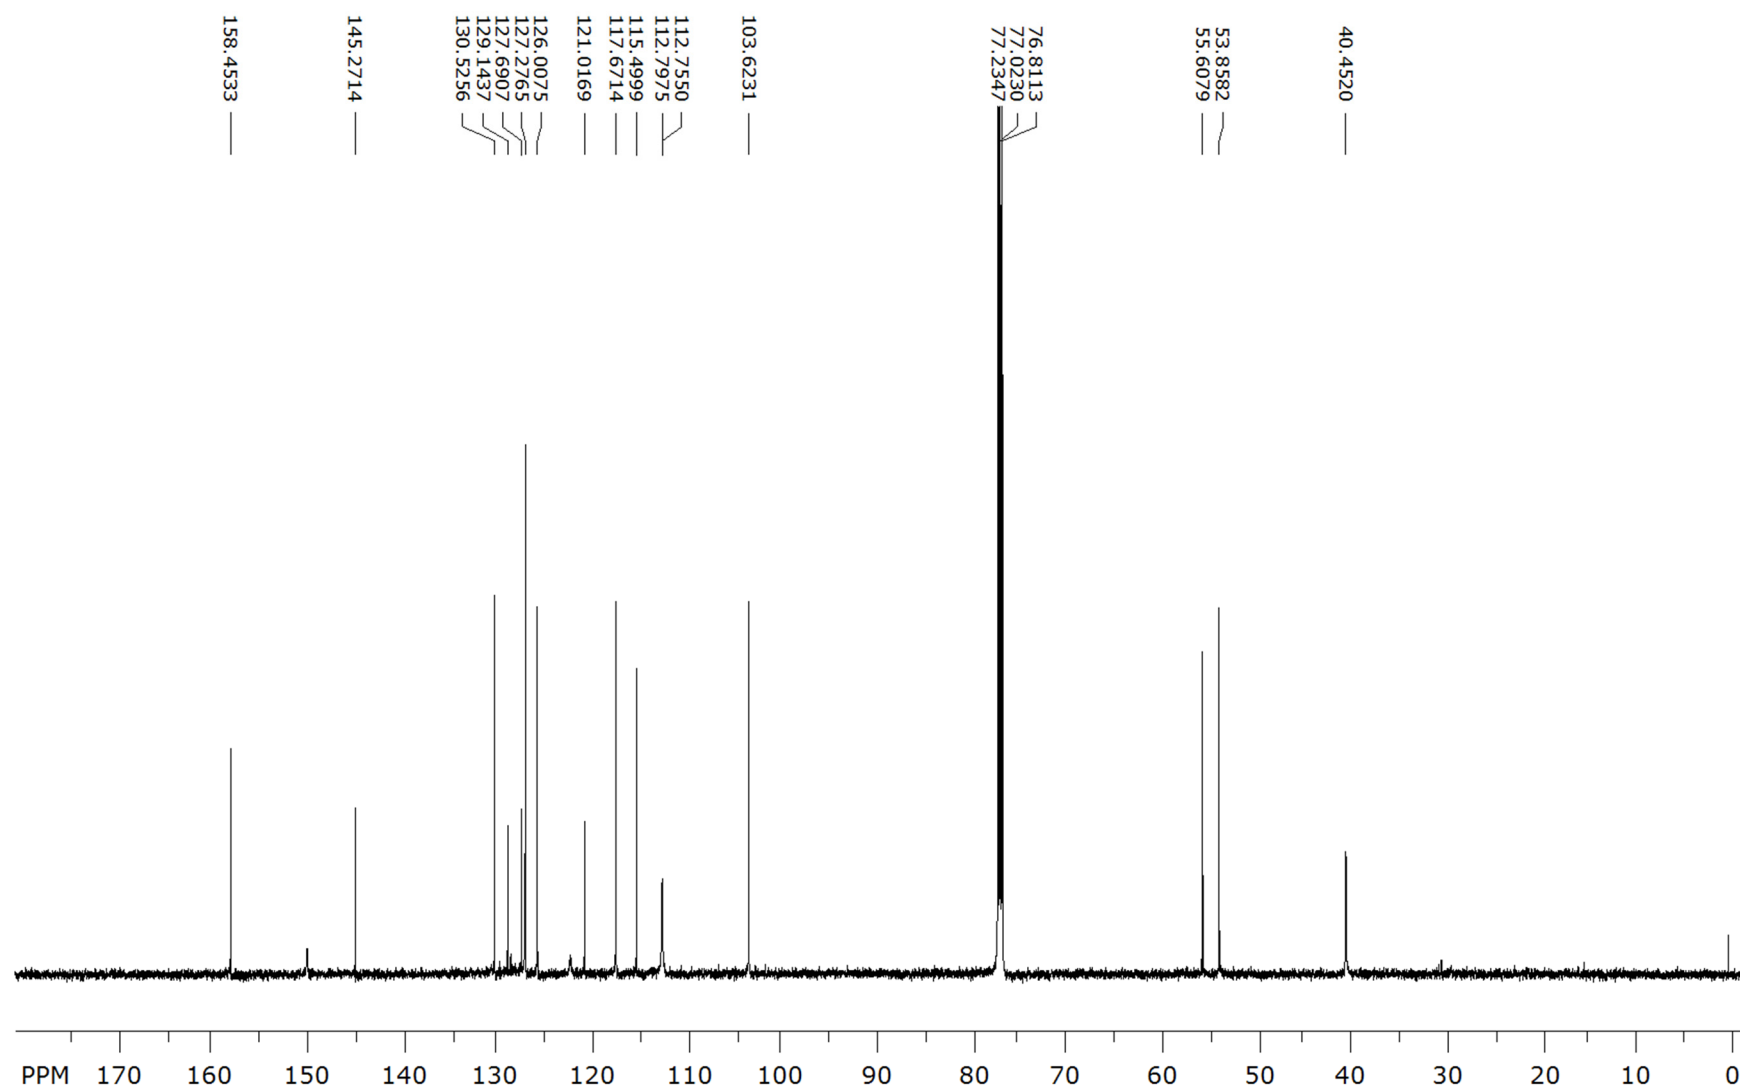

Figure S26. <sup>13</sup>C NMR (CDCl<sub>3</sub>) spectrum of **30**.

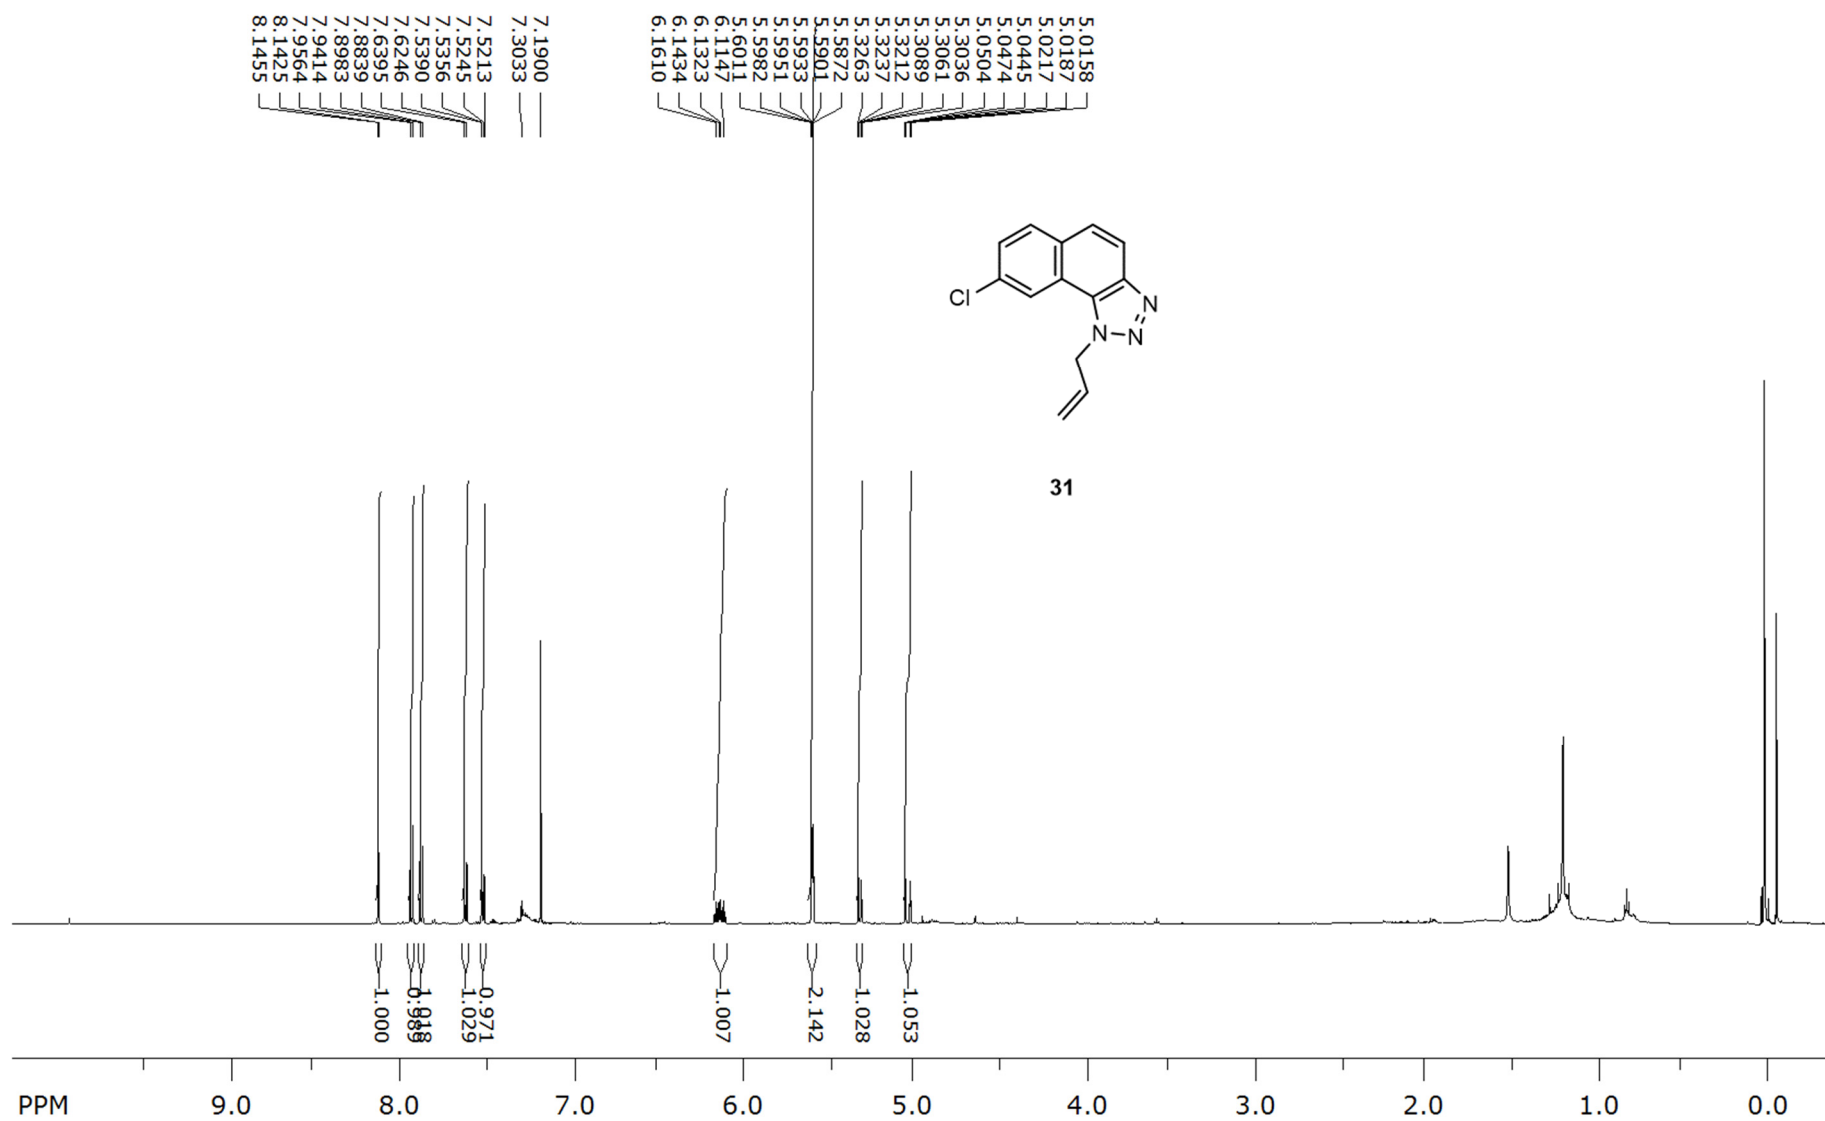

Figure S27. <sup>1</sup>H NMR (CDCl<sub>3</sub>) spectrum of **31**.



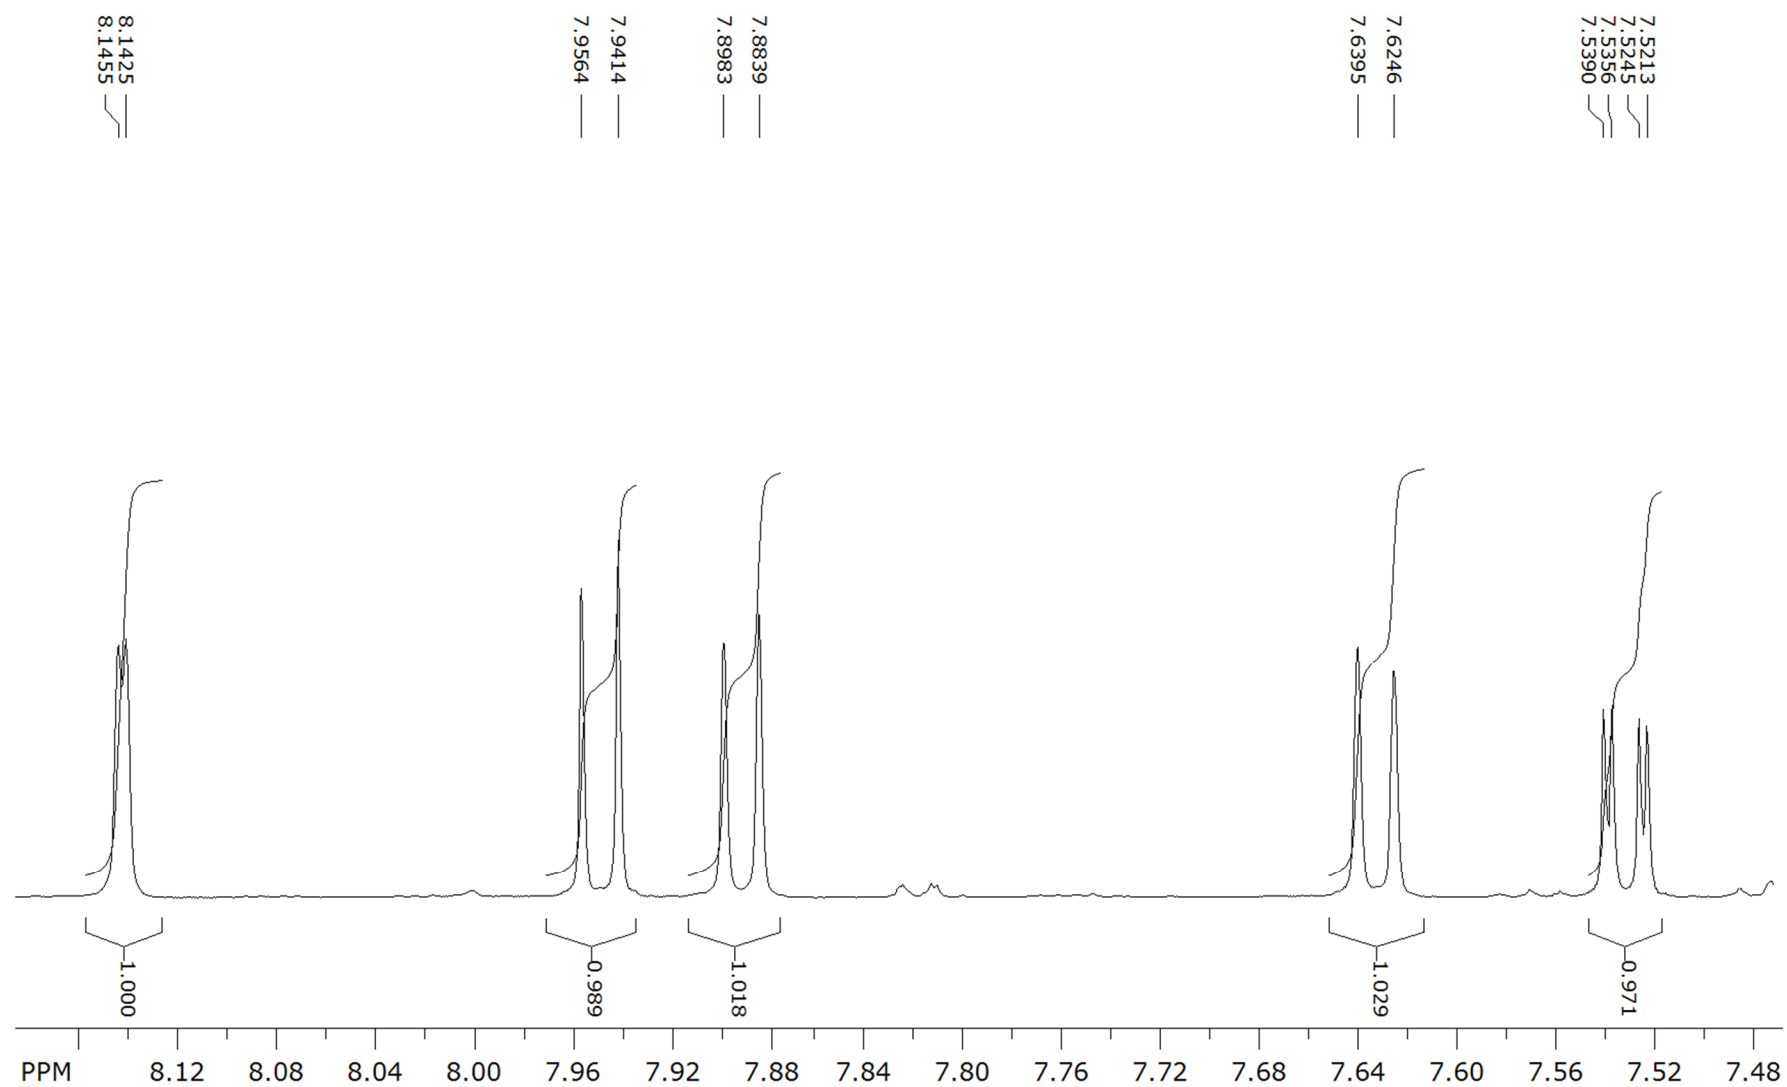

Figure S28. <sup>1</sup>H NMR (CDCl<sub>3</sub>) spectrum of aromatic part of **31**.

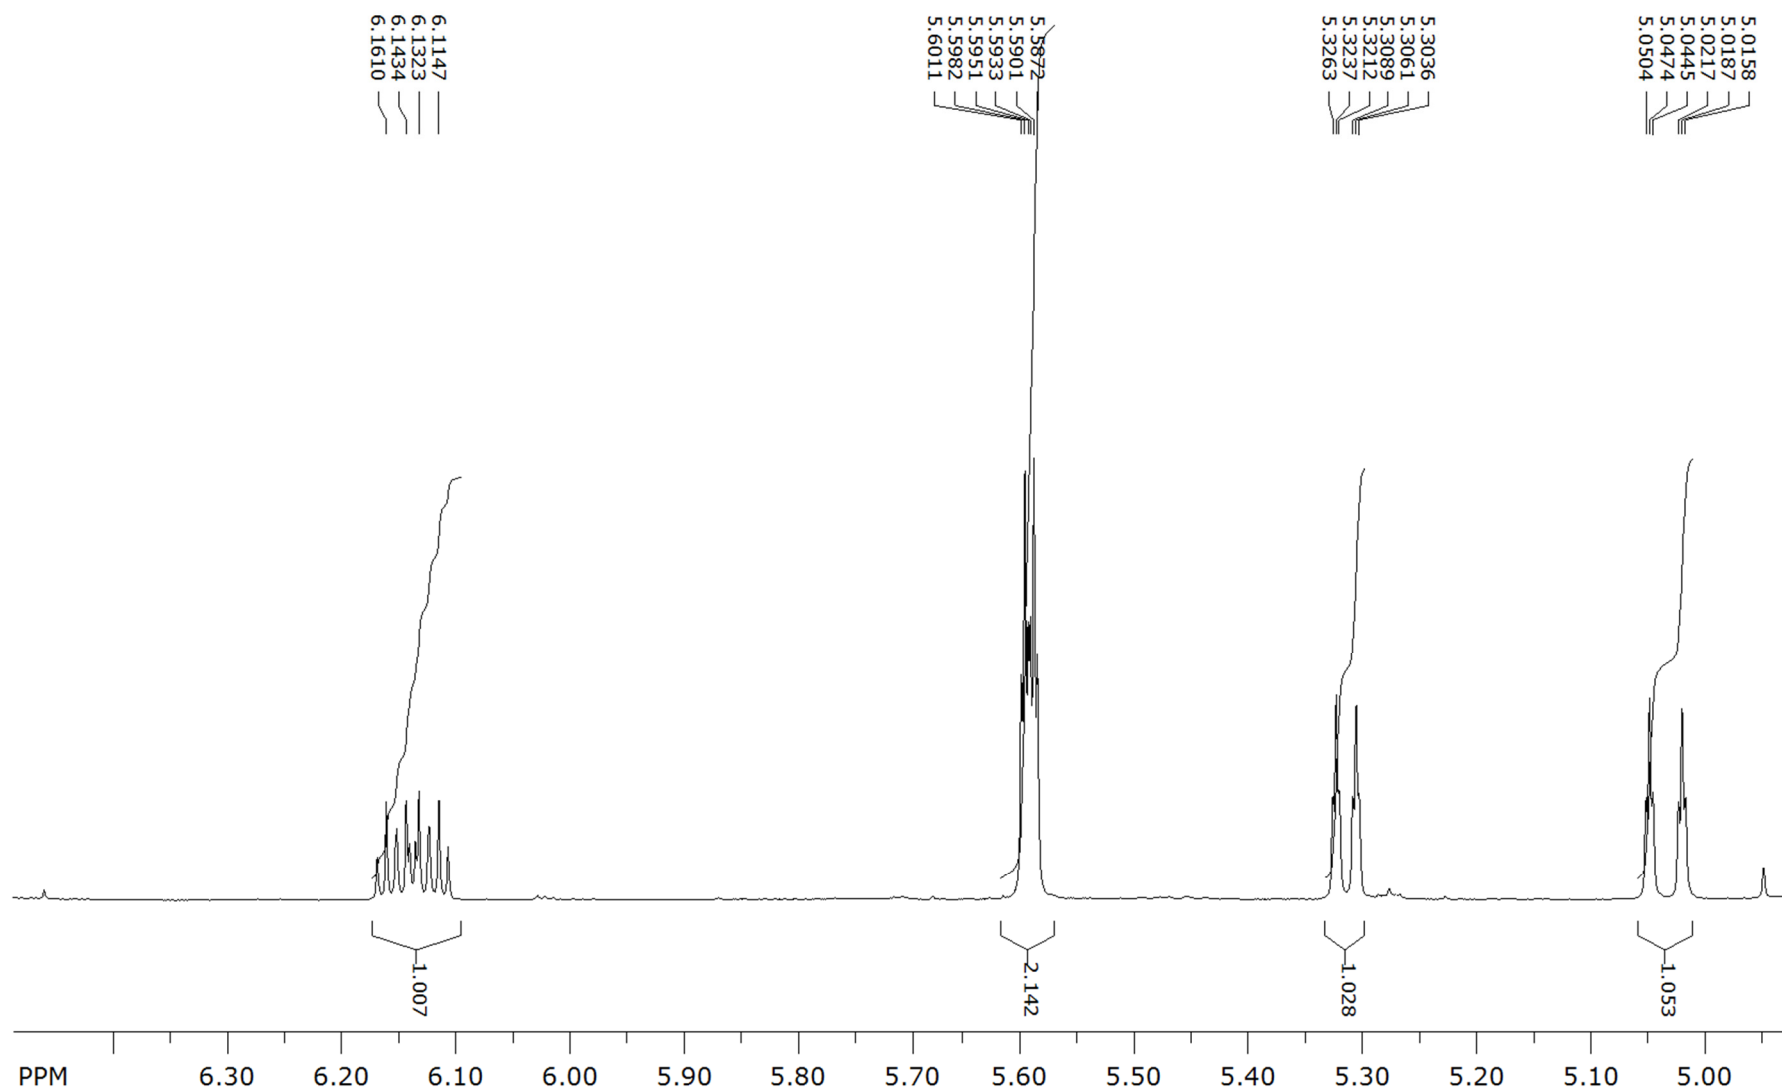

Figure S29. <sup>1</sup>H NMR (CDCl<sub>3</sub>) spectrum of aliphatic part of **31**.

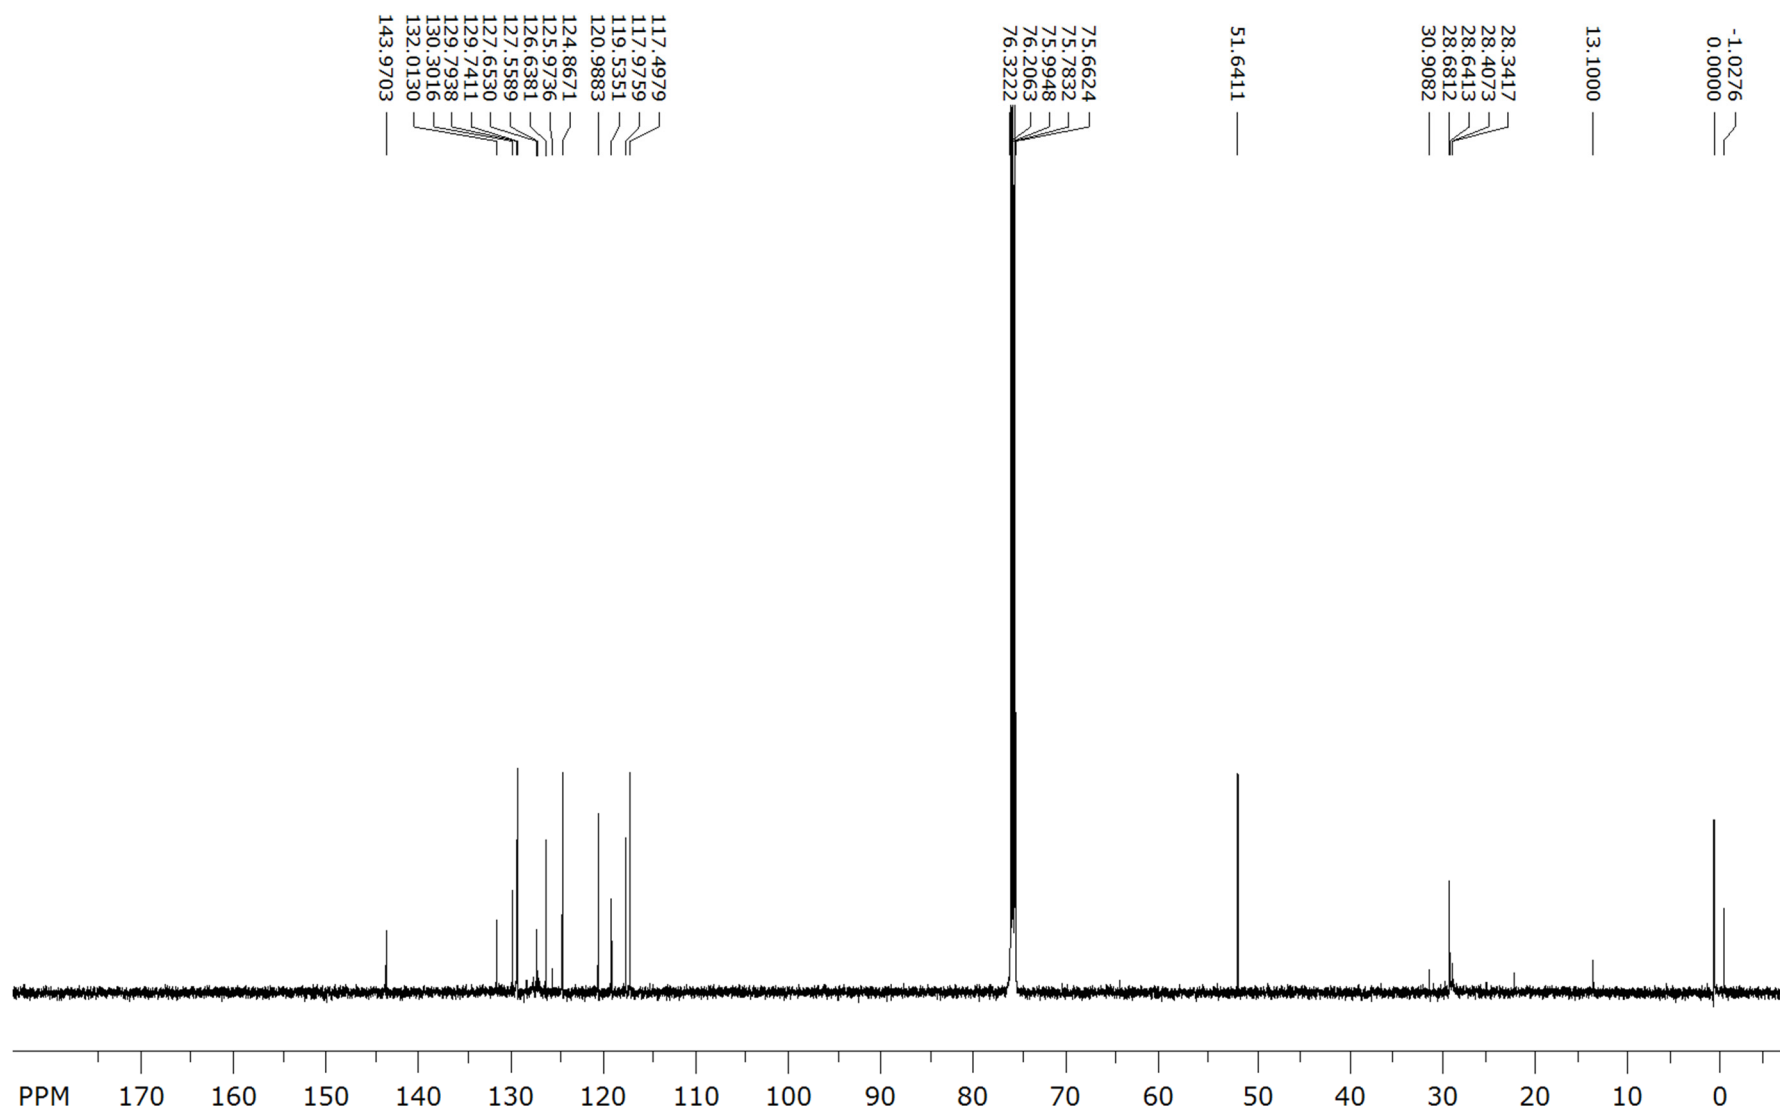

Figure S30. <sup>13</sup>C NMR (CDCl<sub>3</sub>) spectrum of **31**.

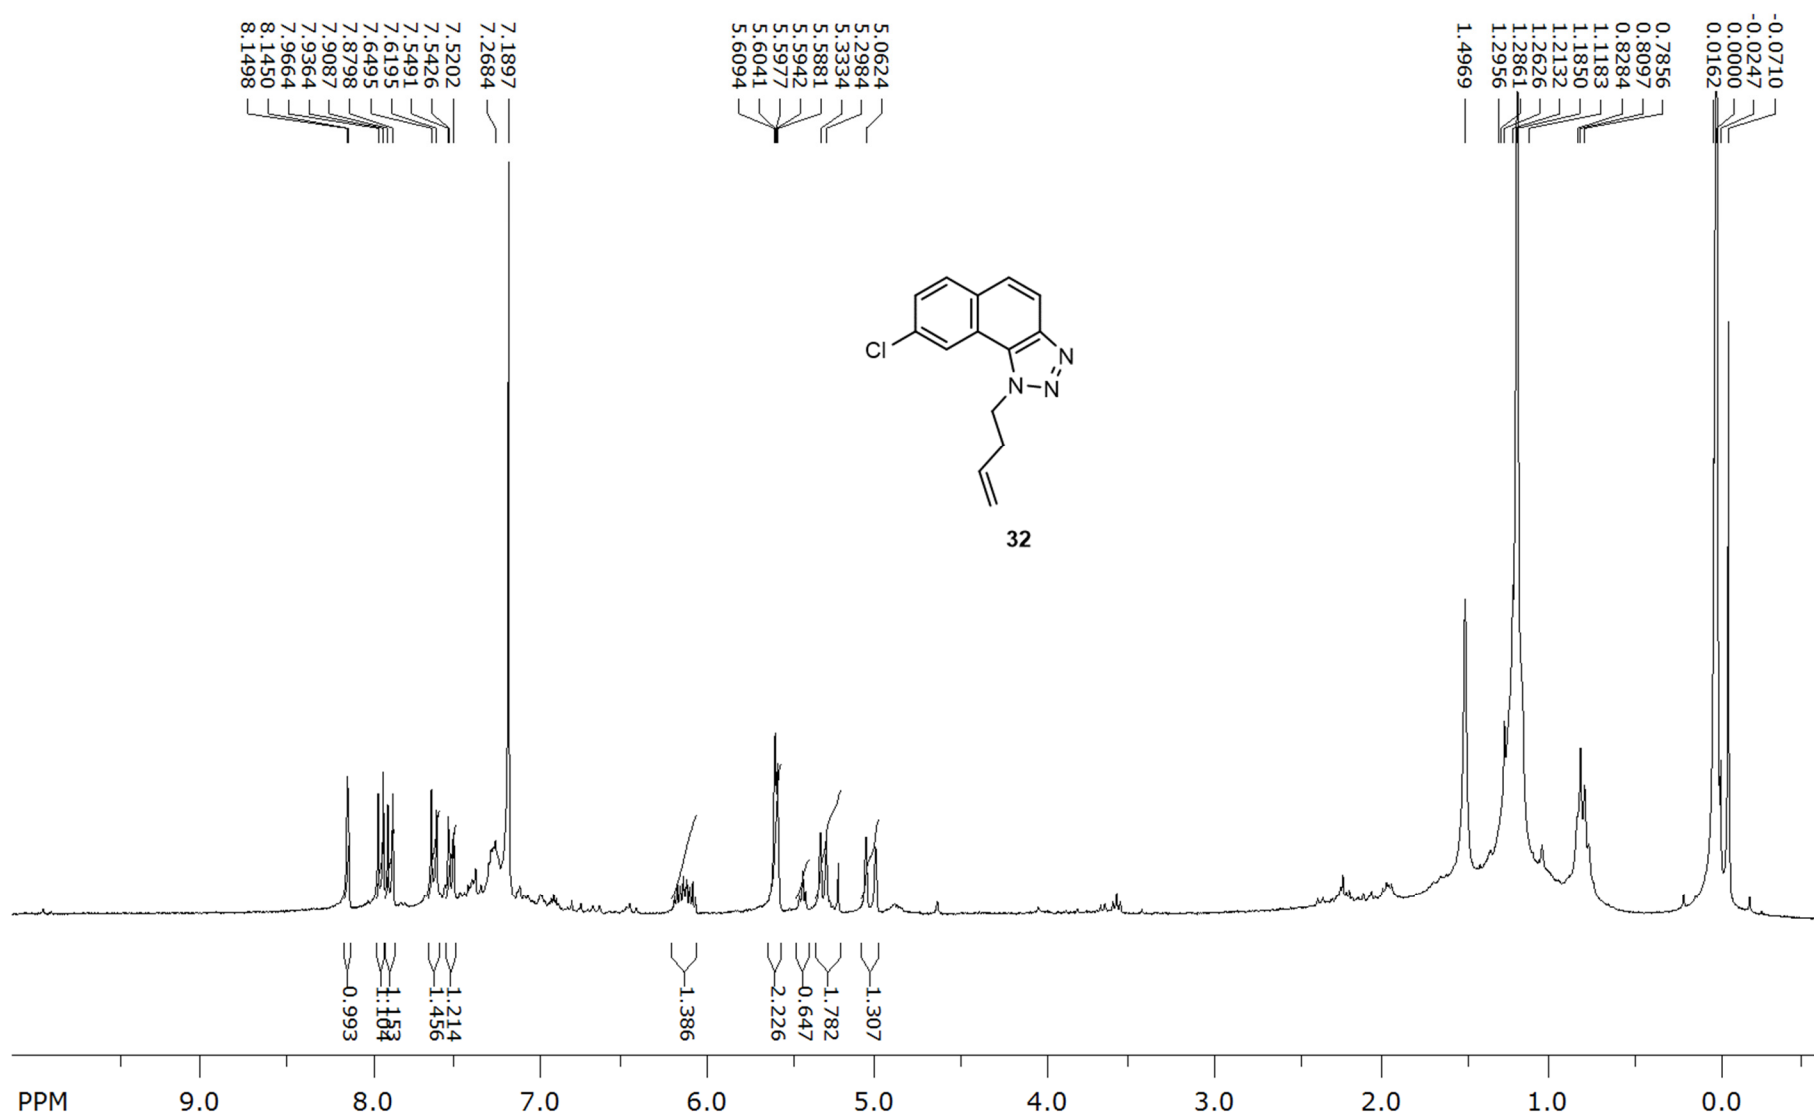

Figure S31. <sup>1</sup>H NMR (CDCl<sub>3</sub>) spectrum of **32**.

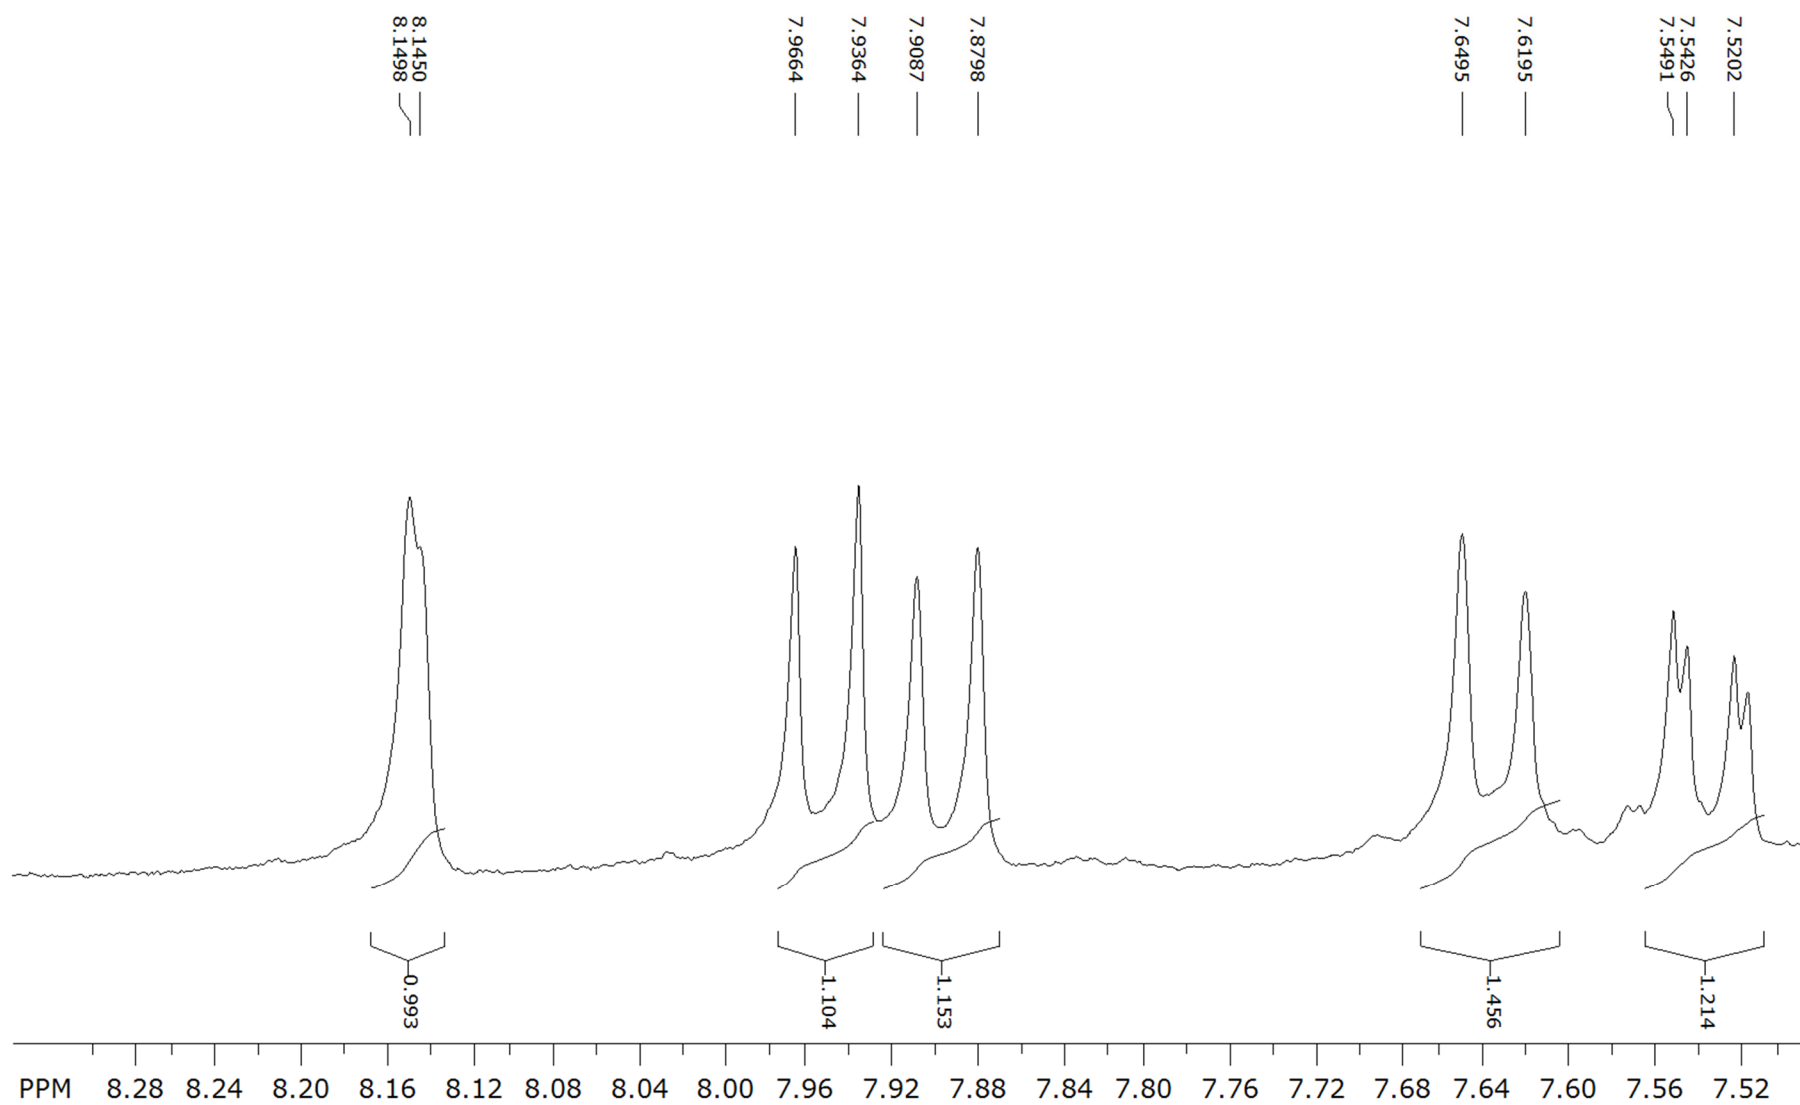

Figure S32.  $^1\text{H}$  NMR ( $\text{CDCl}_3$ ) spectrum of aromatic part of **32**.

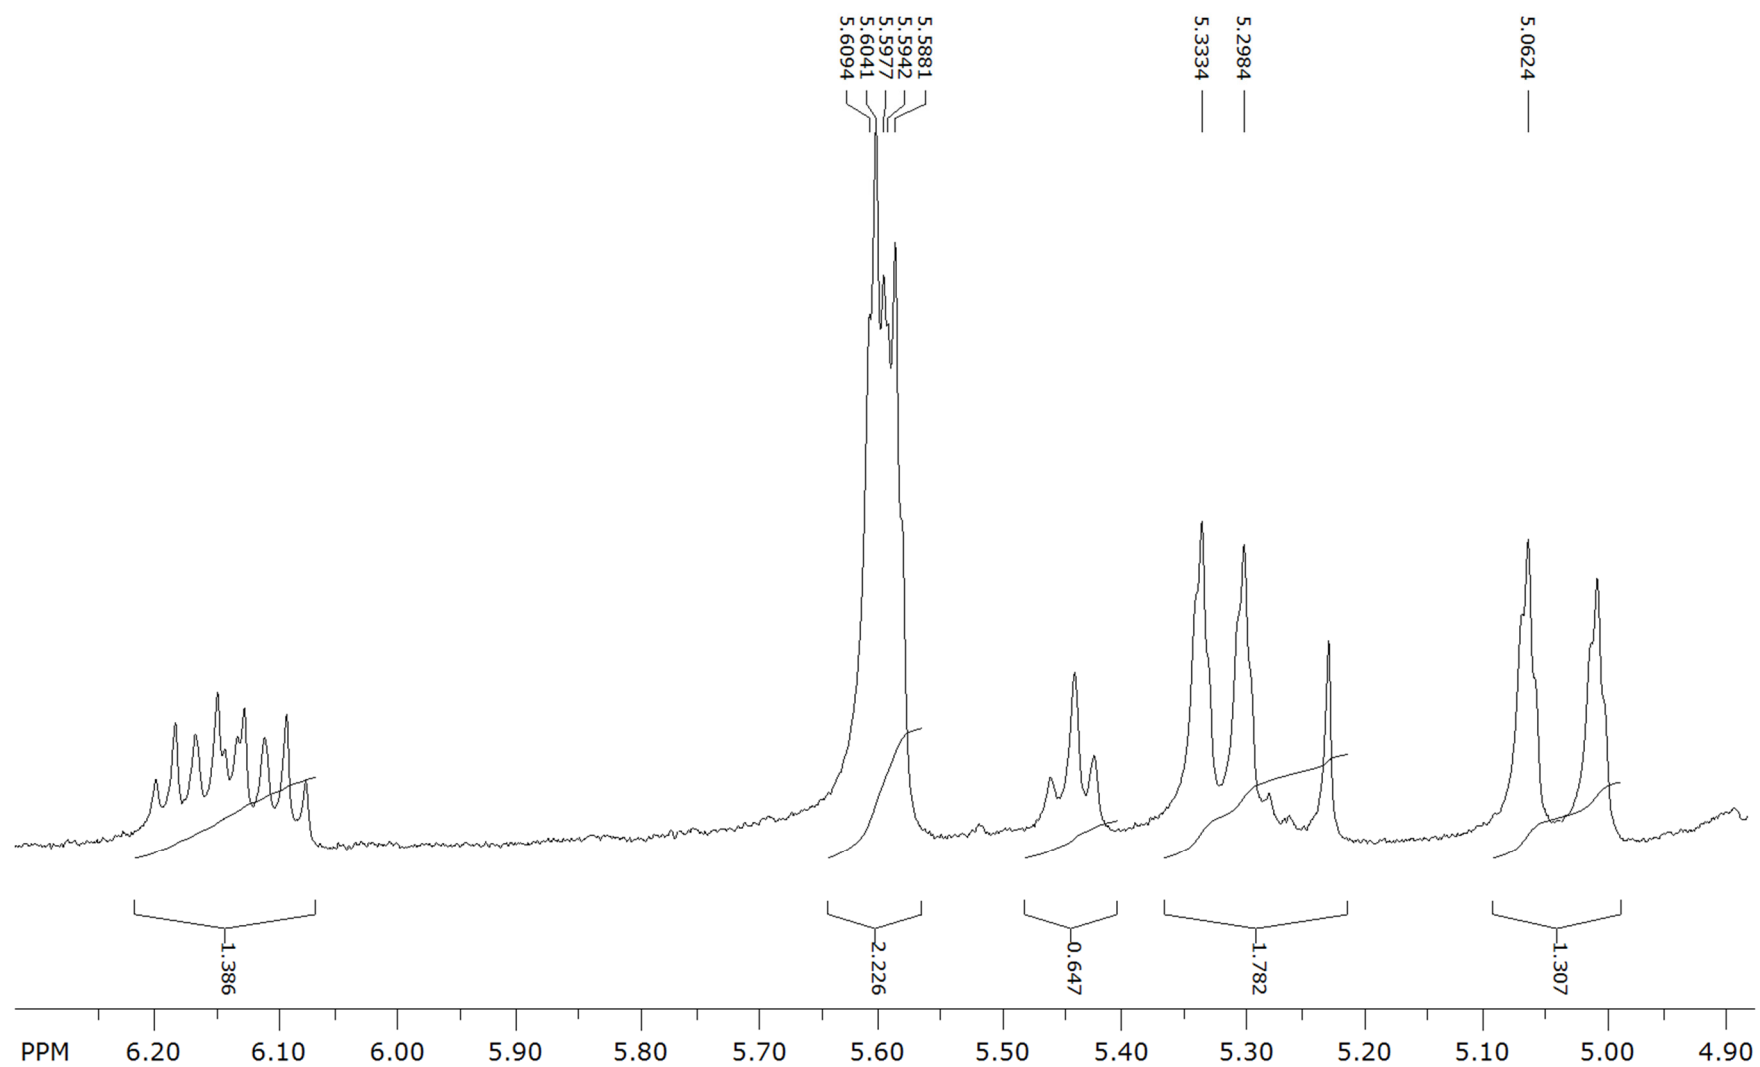

Figure S33. <sup>1</sup>H NMR (CDCl<sub>3</sub>) spectrum of aliphatic part of **32**.

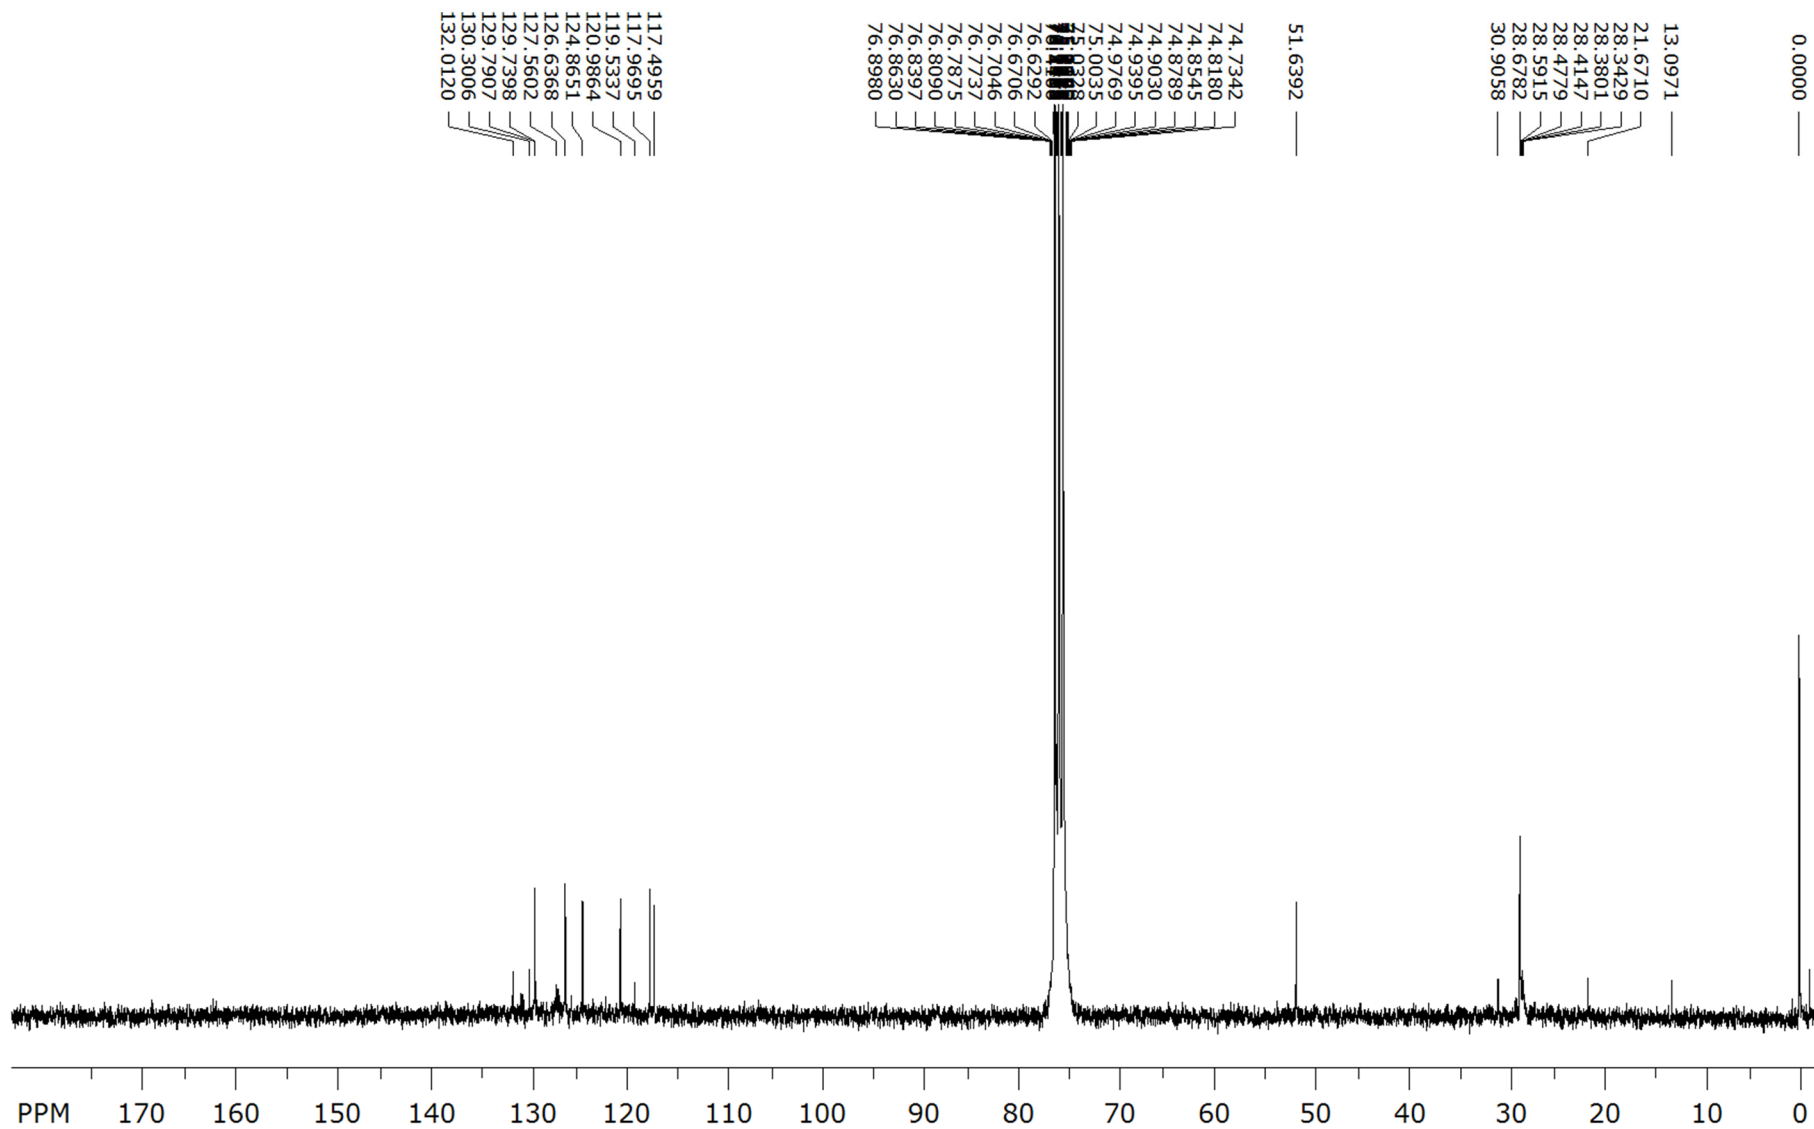

Figure S34. <sup>13</sup>C NMR (CDCl<sub>3</sub>) spectrum of **32**.

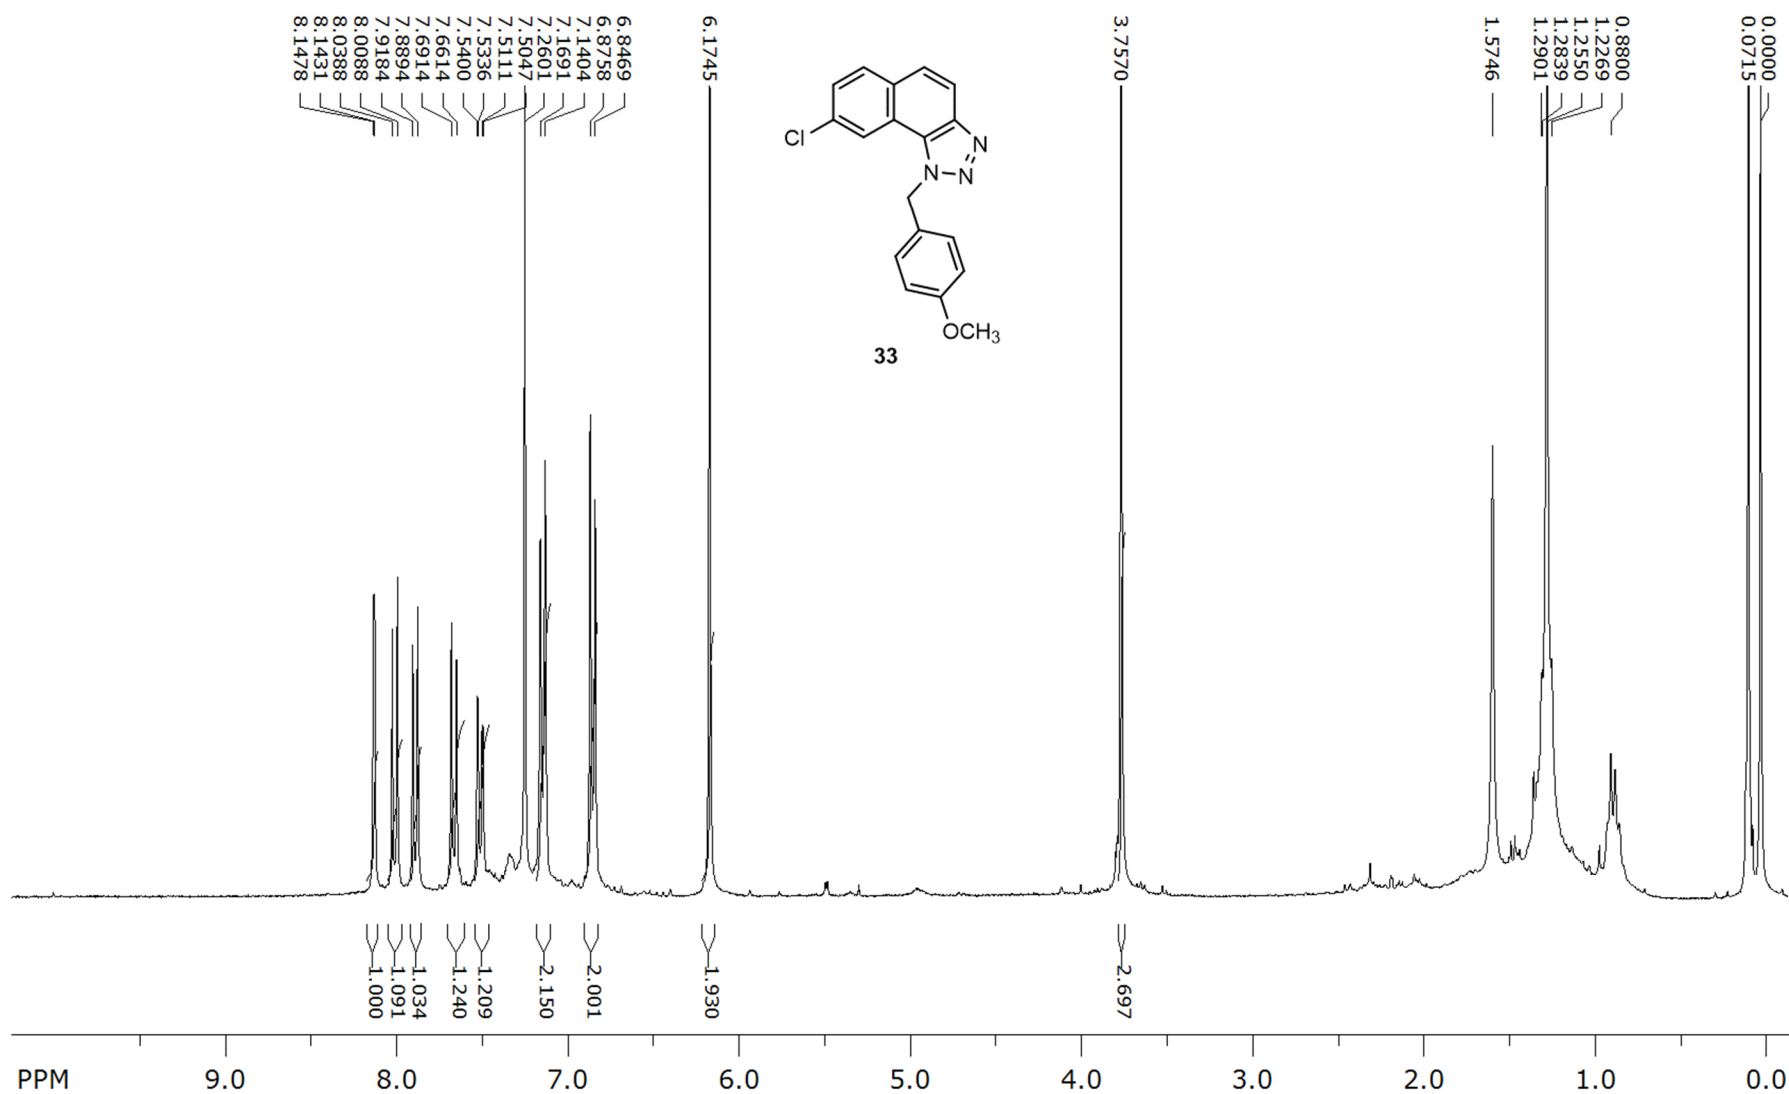

Figure S35. <sup>1</sup>H NMR (CDCl<sub>3</sub>) spectrum of **33**.



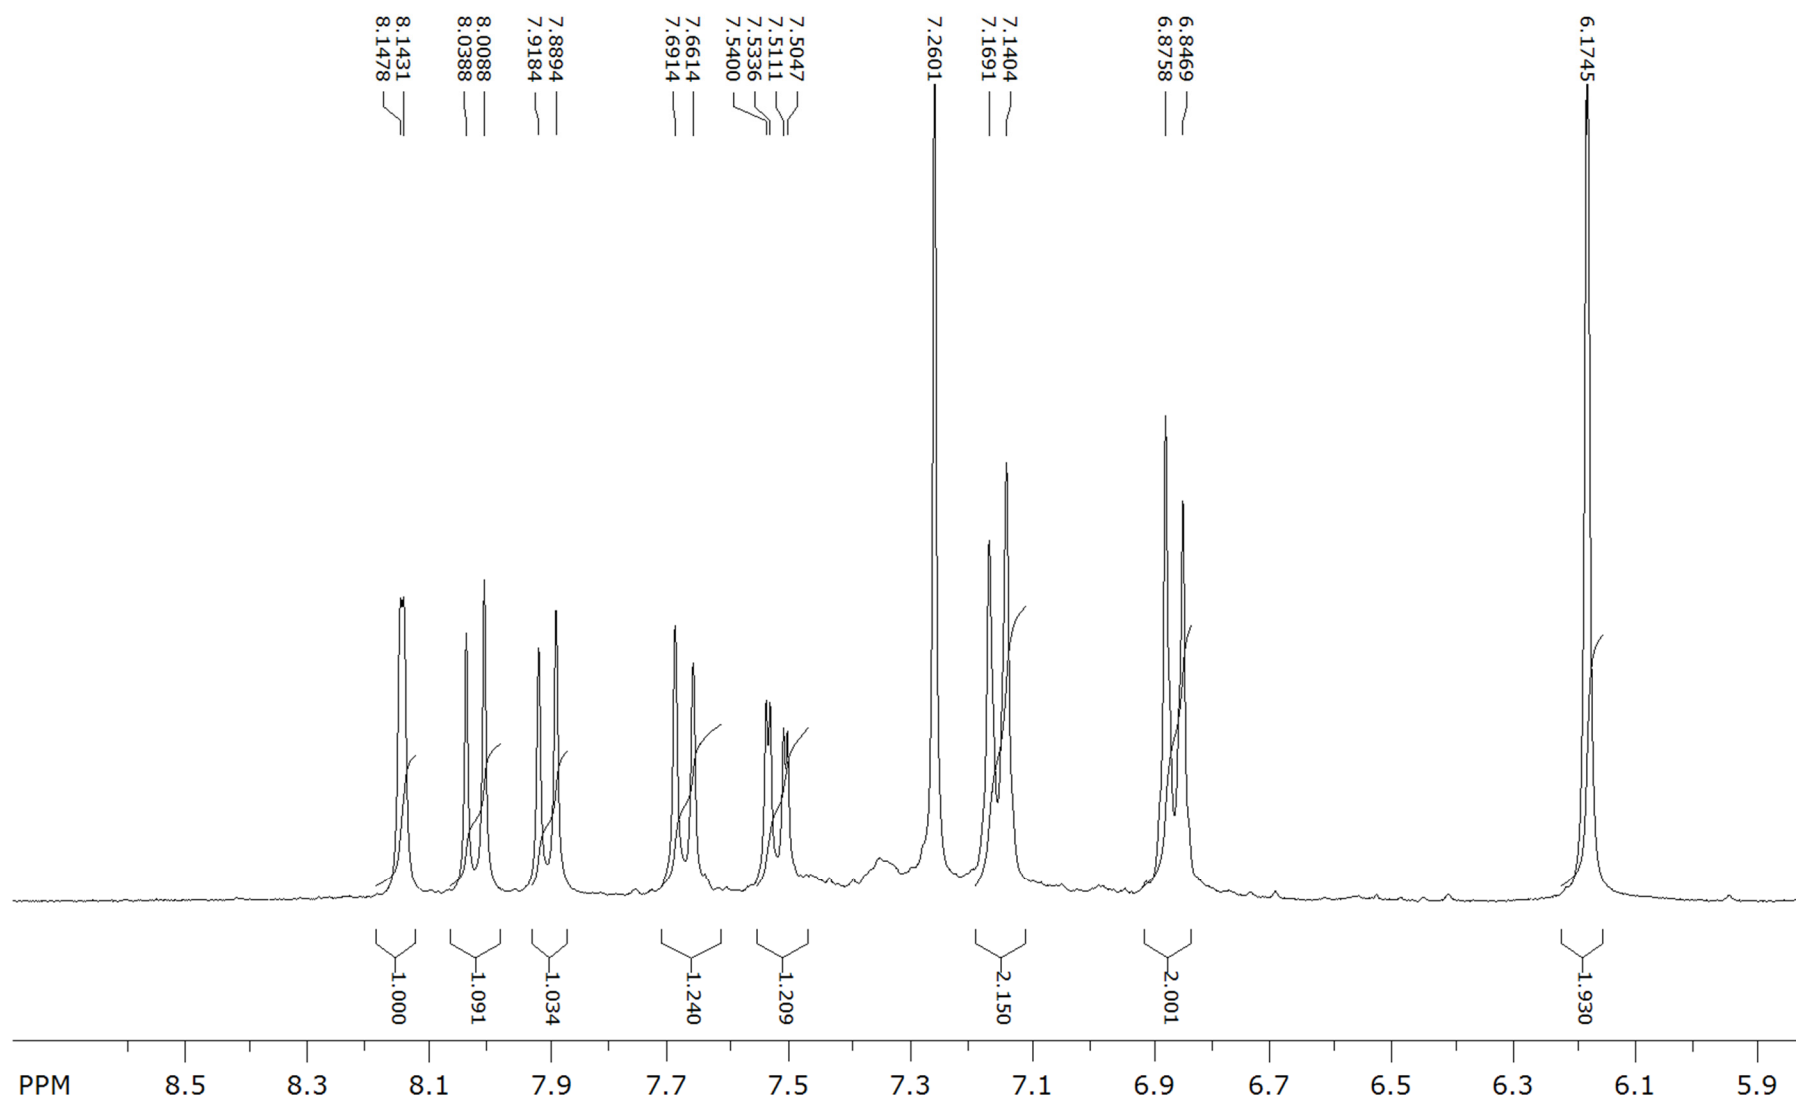

Figure S36. <sup>1</sup>H NMR (CDCl<sub>3</sub>) spectrum of aromatic part of **33**.

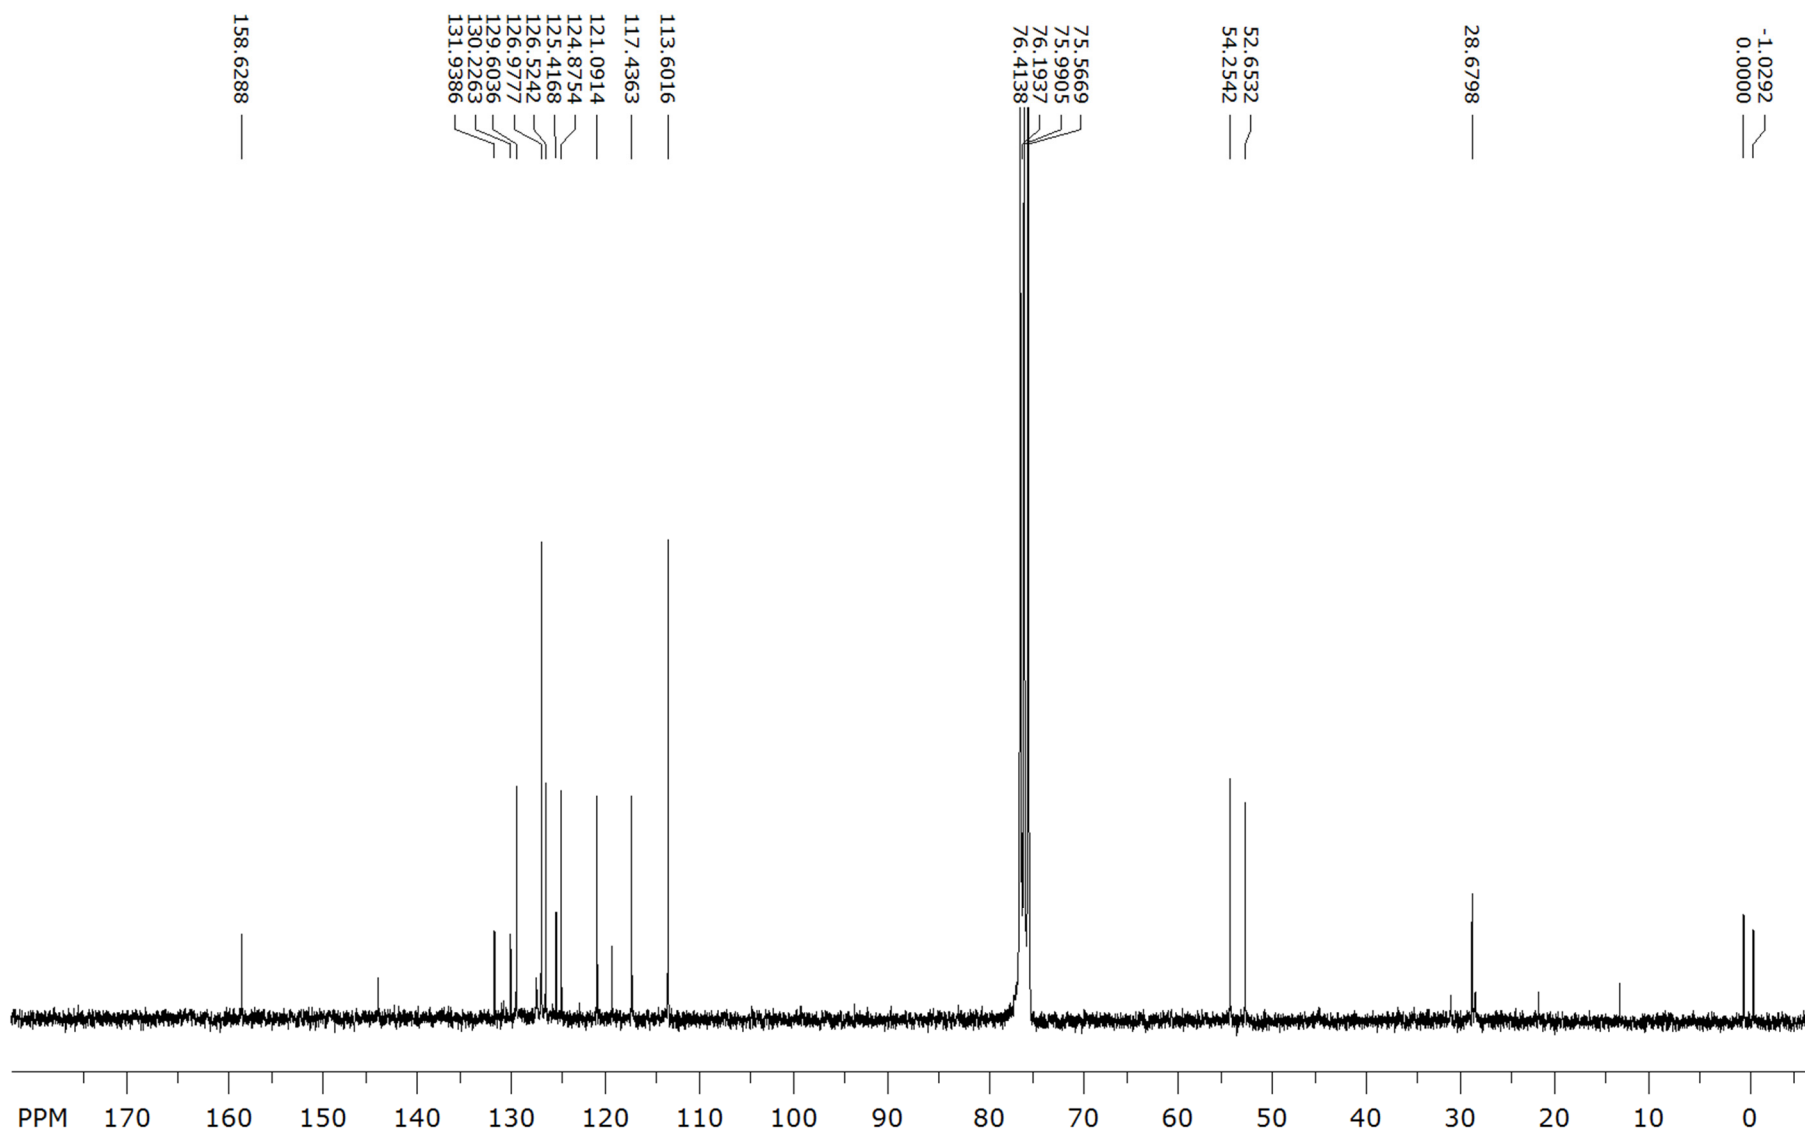

Figure S37. <sup>13</sup>C NMR (CDCl<sub>3</sub>) spectrum of **33**.

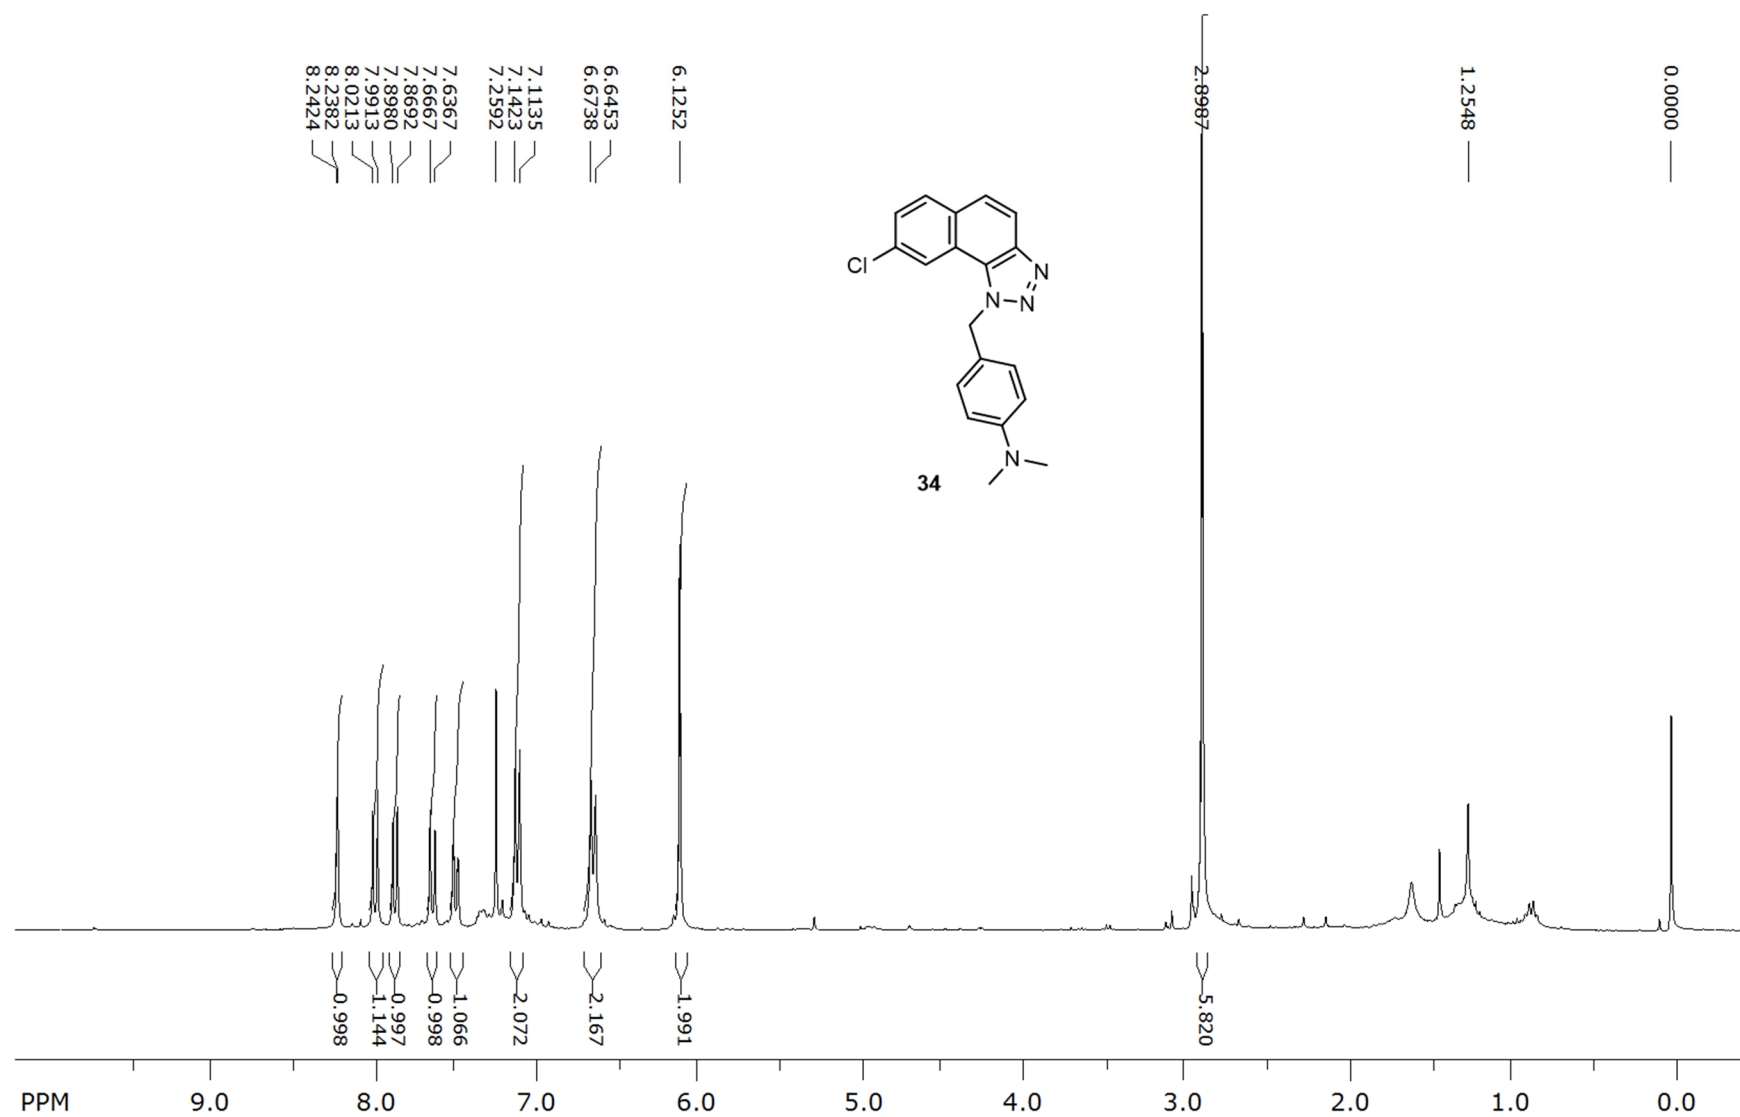

Figure S38. <sup>1</sup>H NMR (CDCl<sub>3</sub>) spectrum of **34**.

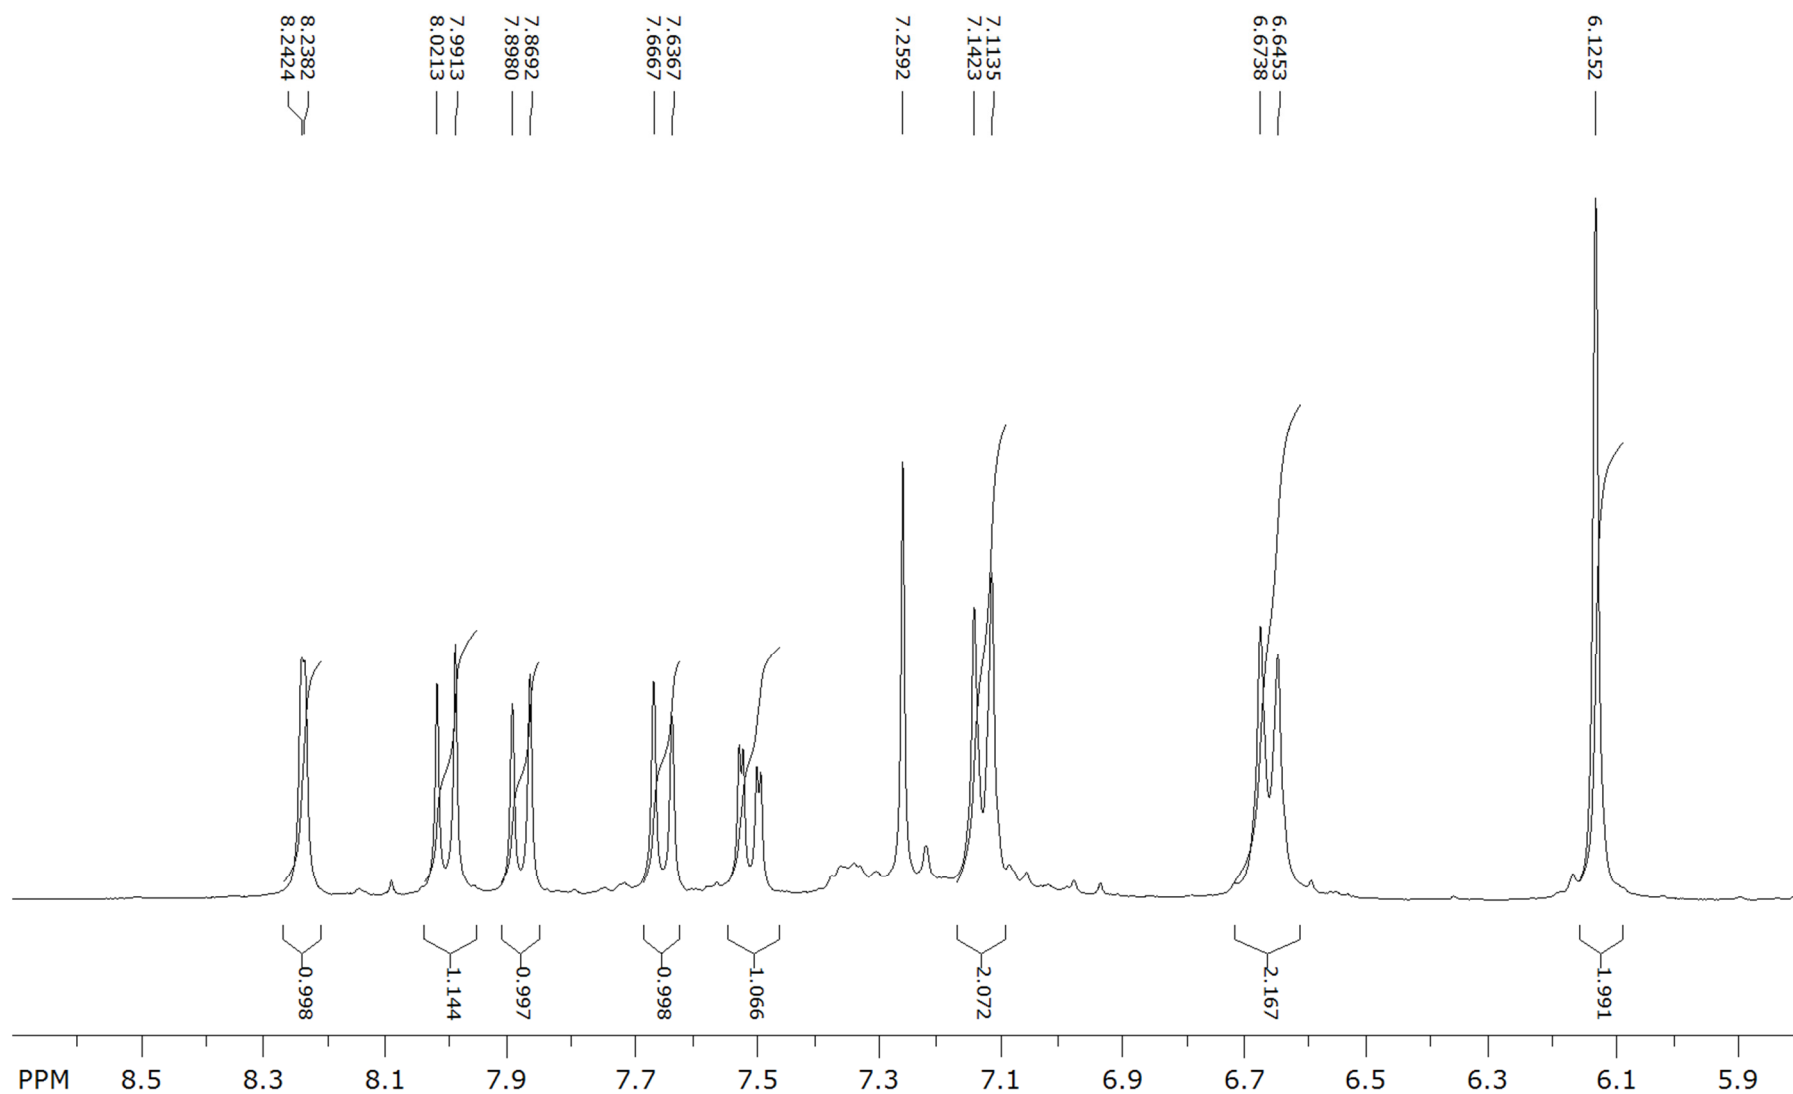

Figure S39.  $^1\text{H}$  NMR ( $\text{CDCl}_3$ ) spectrum of aromatic part of **34**.

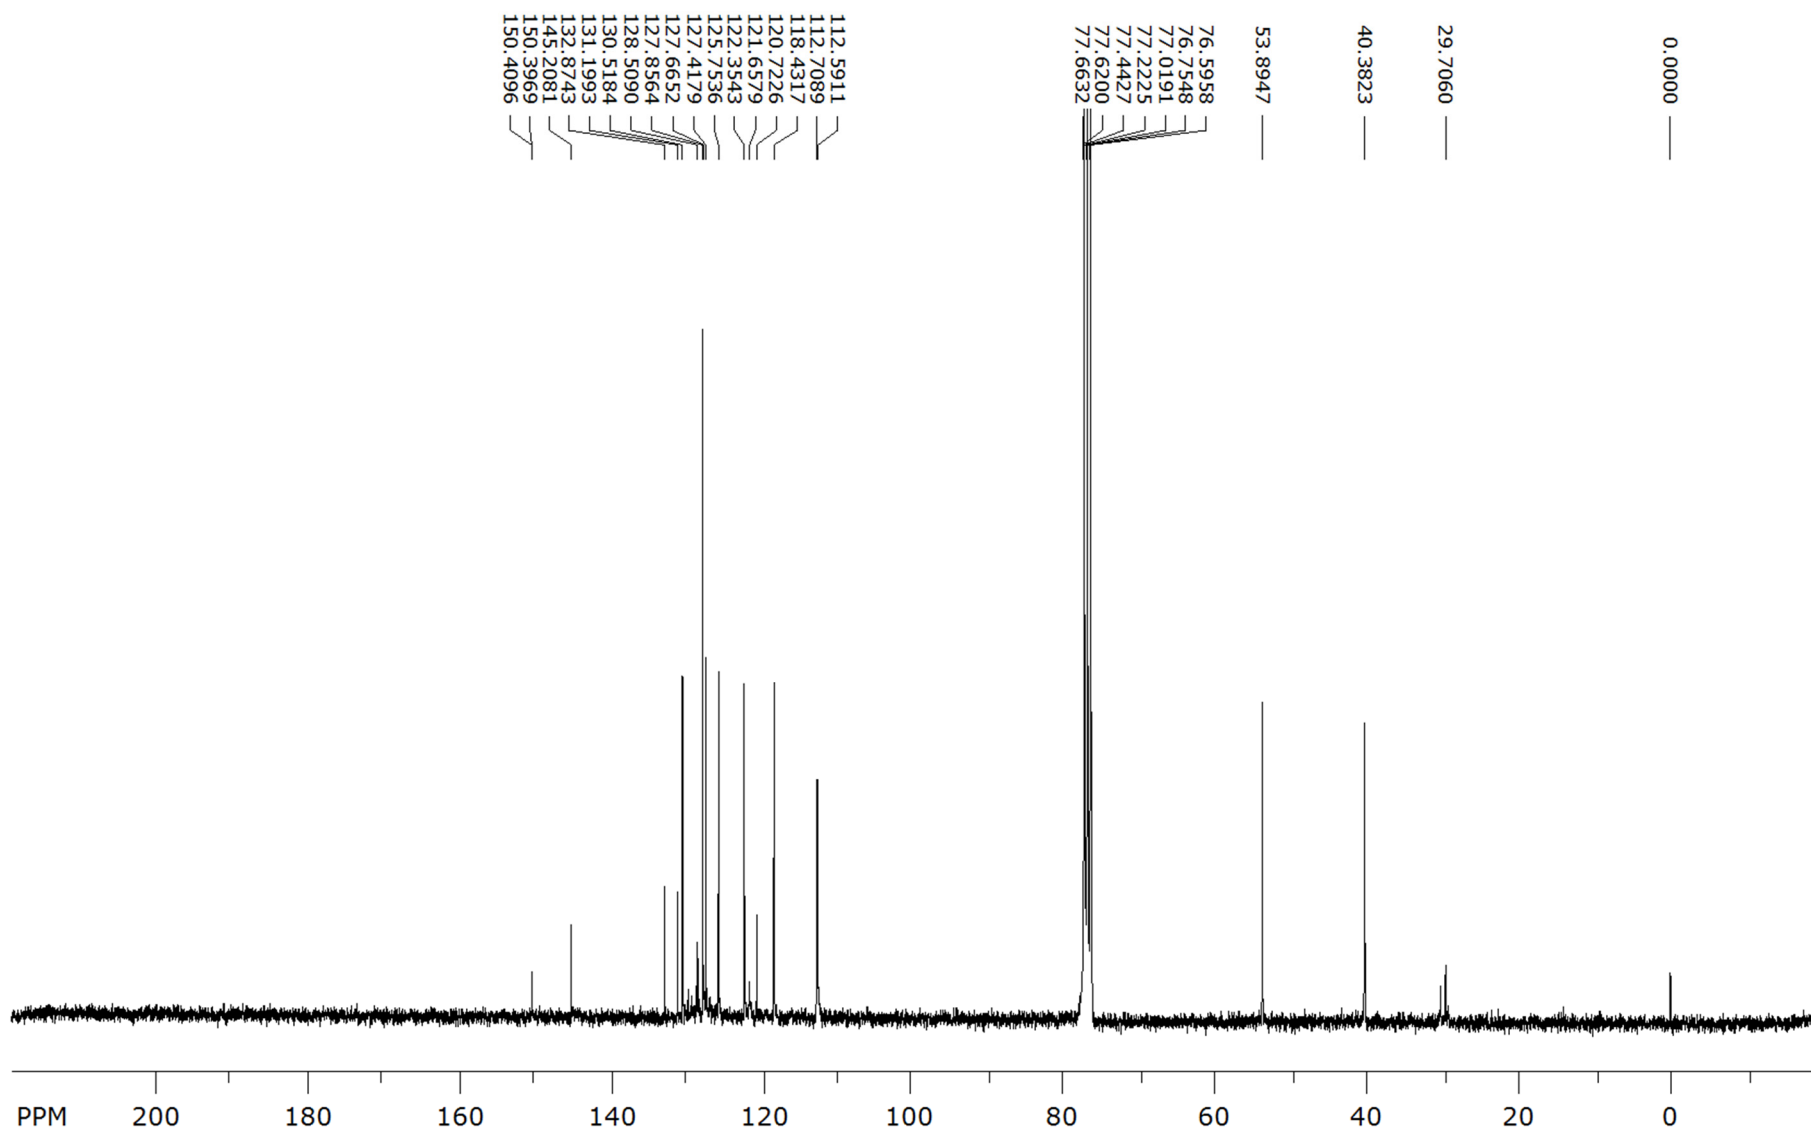

Figure S40. <sup>13</sup>C NMR (CDCl<sub>3</sub>) spectrum of **34**.

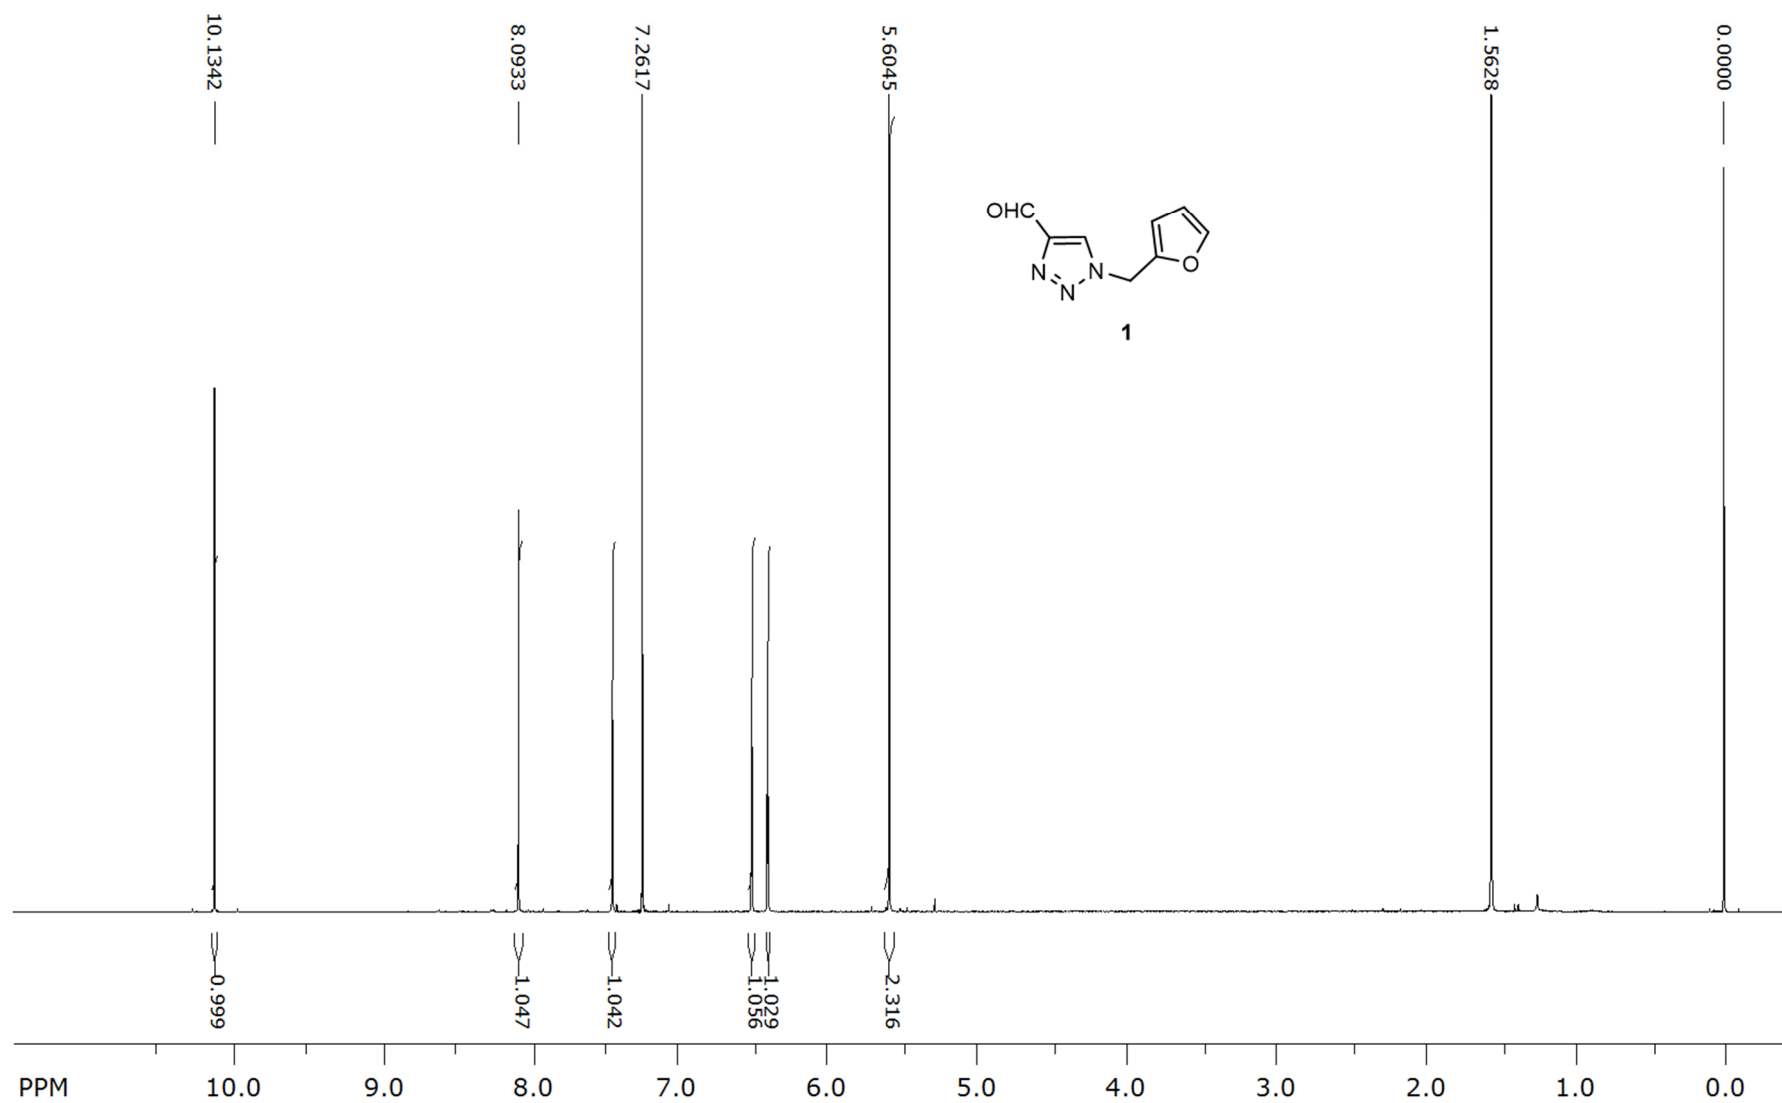

Figure S41.  $^1\text{H}$  NMR ( $\text{CDCl}_3$ ) spectrum of **1**.

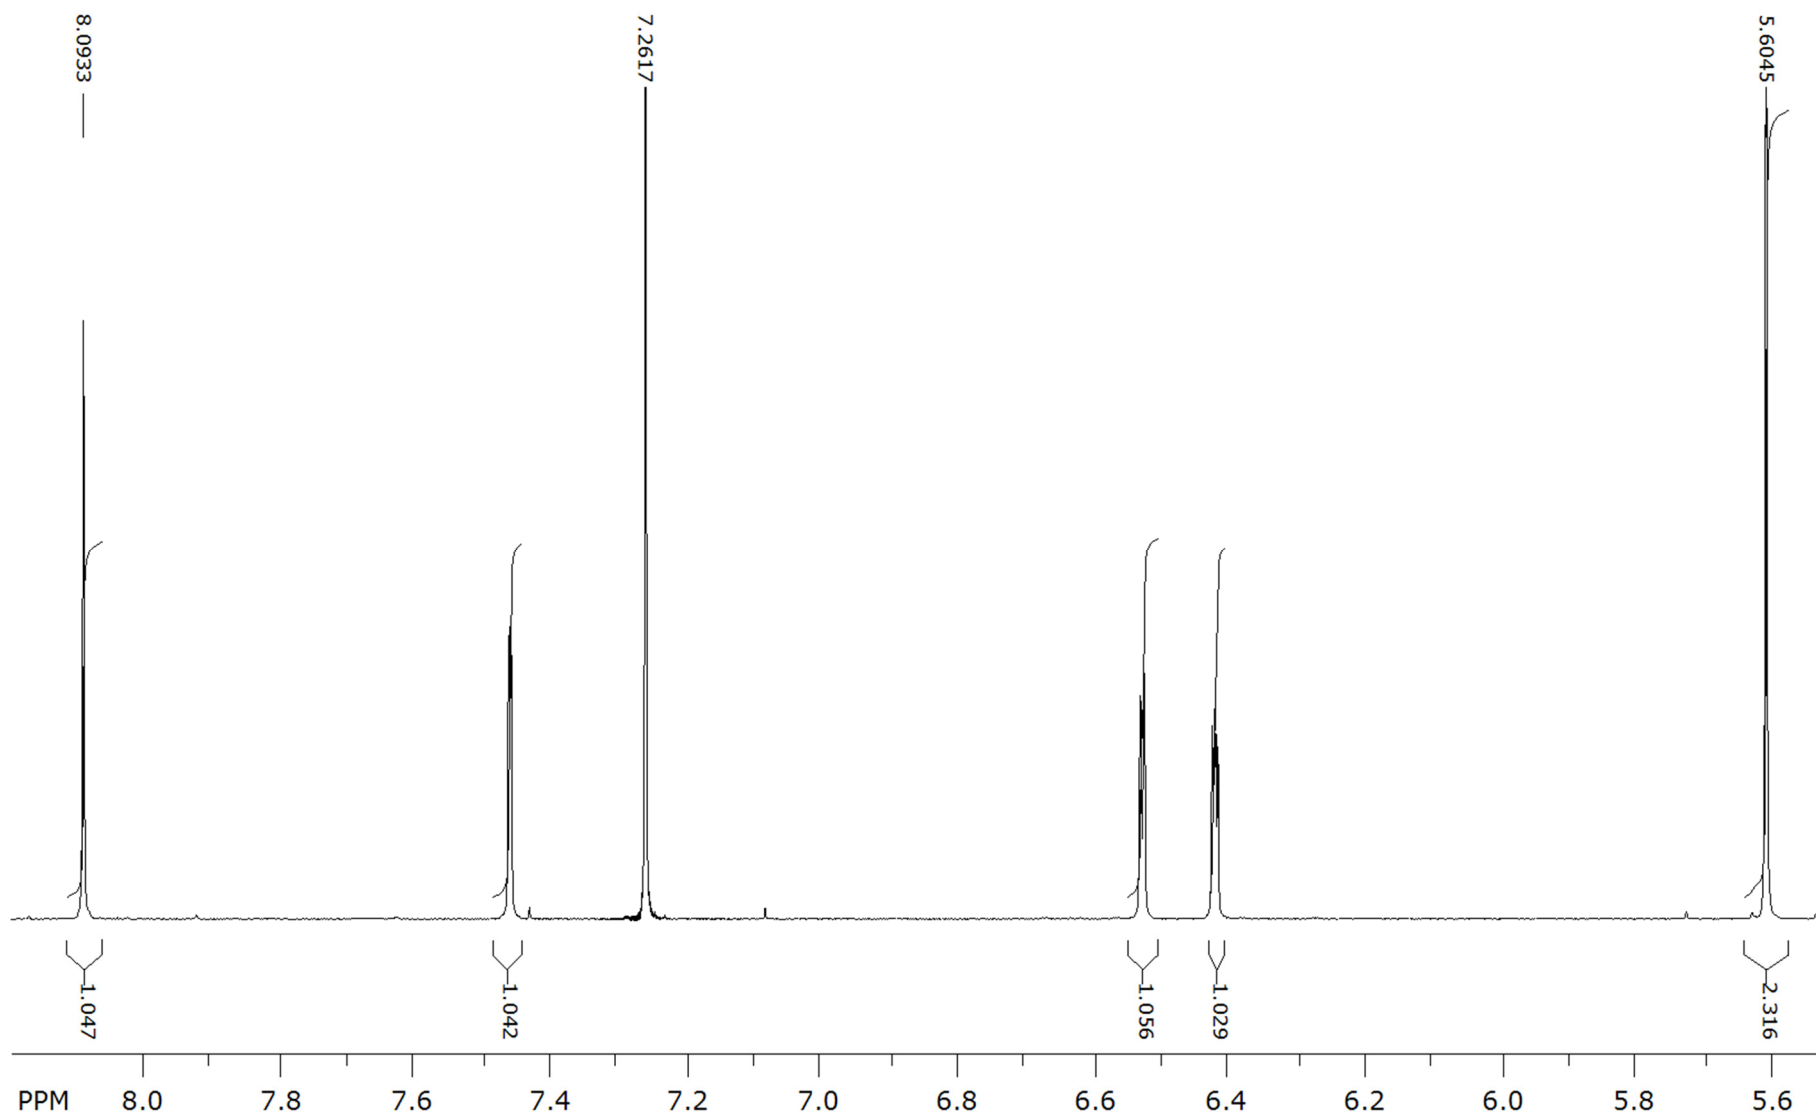

Figure S42.  $^1\text{H}$  NMR ( $\text{CDCl}_3$ ) spectrum of aromatic part of **1**.

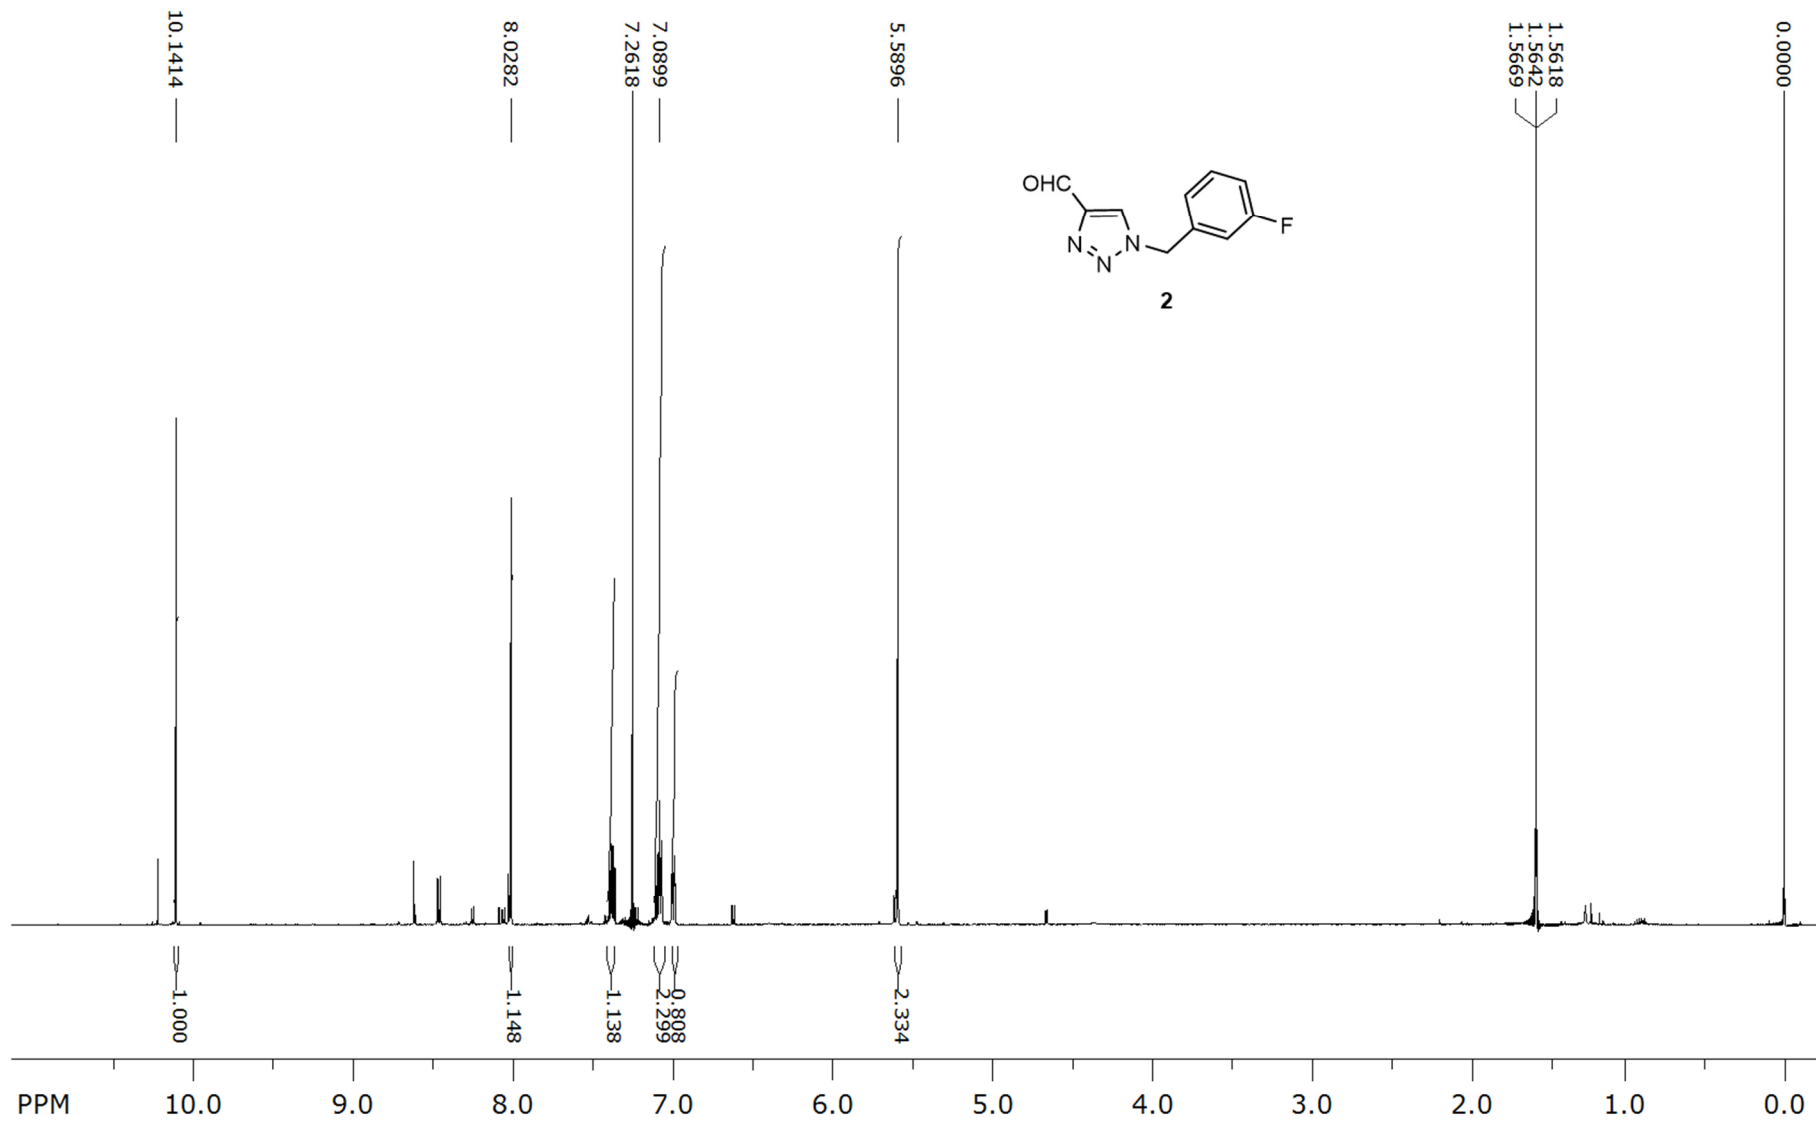

Figure S43. <sup>1</sup>H NMR (CDCl<sub>3</sub>) spectrum of **2**.



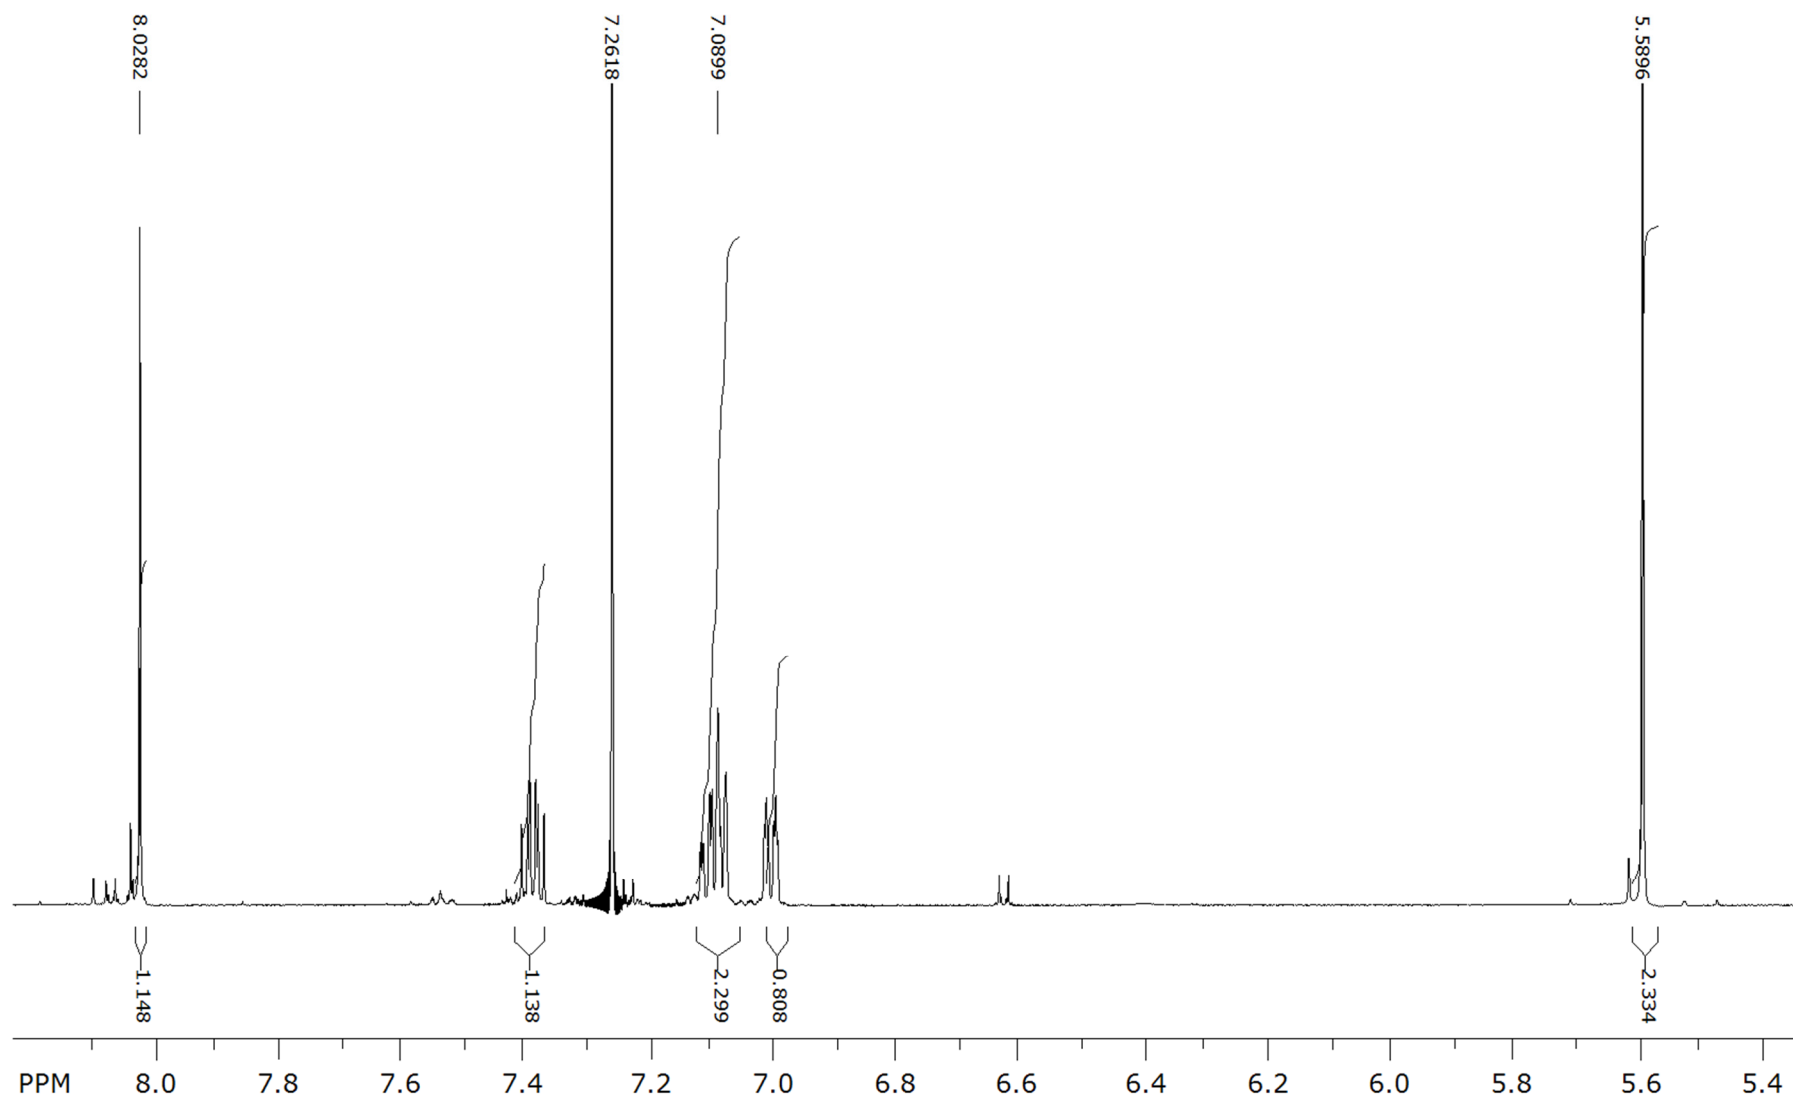

Figure S44.  $^1\text{H}$  NMR ( $\text{CDCl}_3$ ) spectrum of aromatic part of **2**.

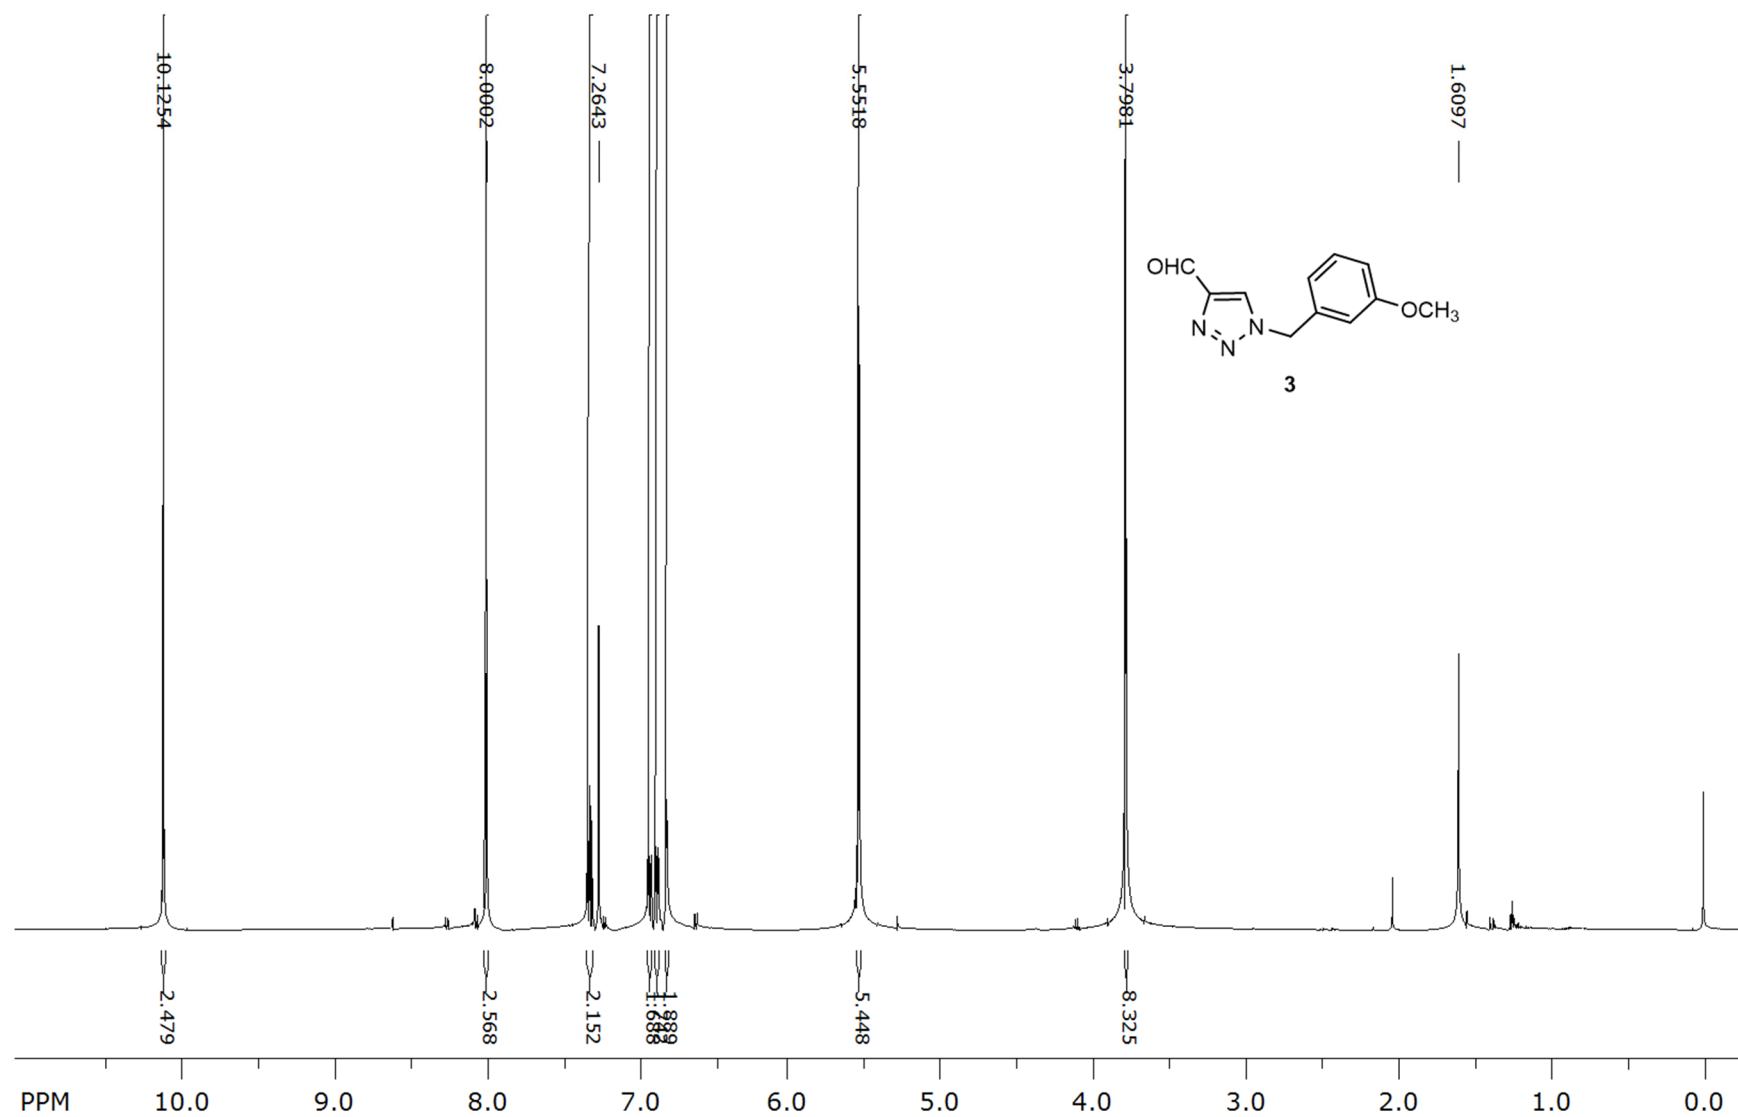

Figure S45.  $^1\text{H}$  NMR ( $\text{CDCl}_3$ ) spectrum of **3**.

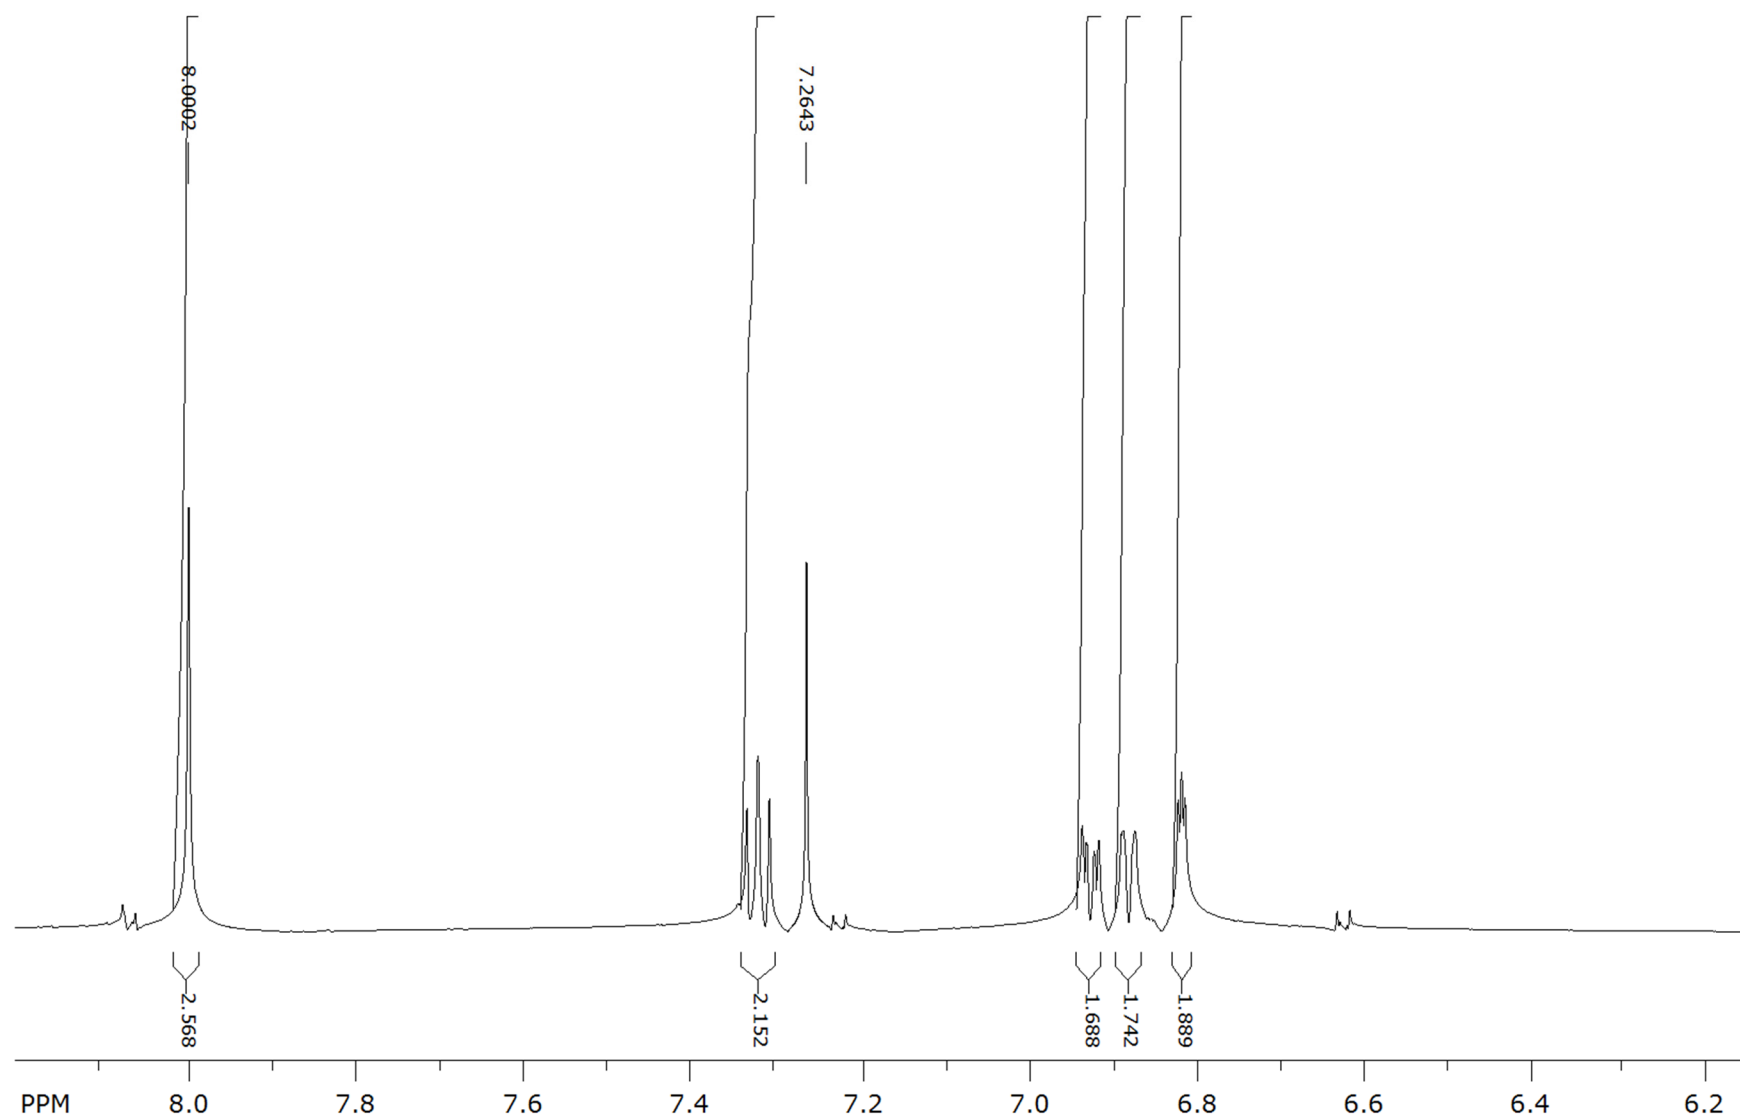

Figure S46.  $^1\text{H}$  NMR ( $\text{CDCl}_3$ ) spectrum of aromatic part of **3**.

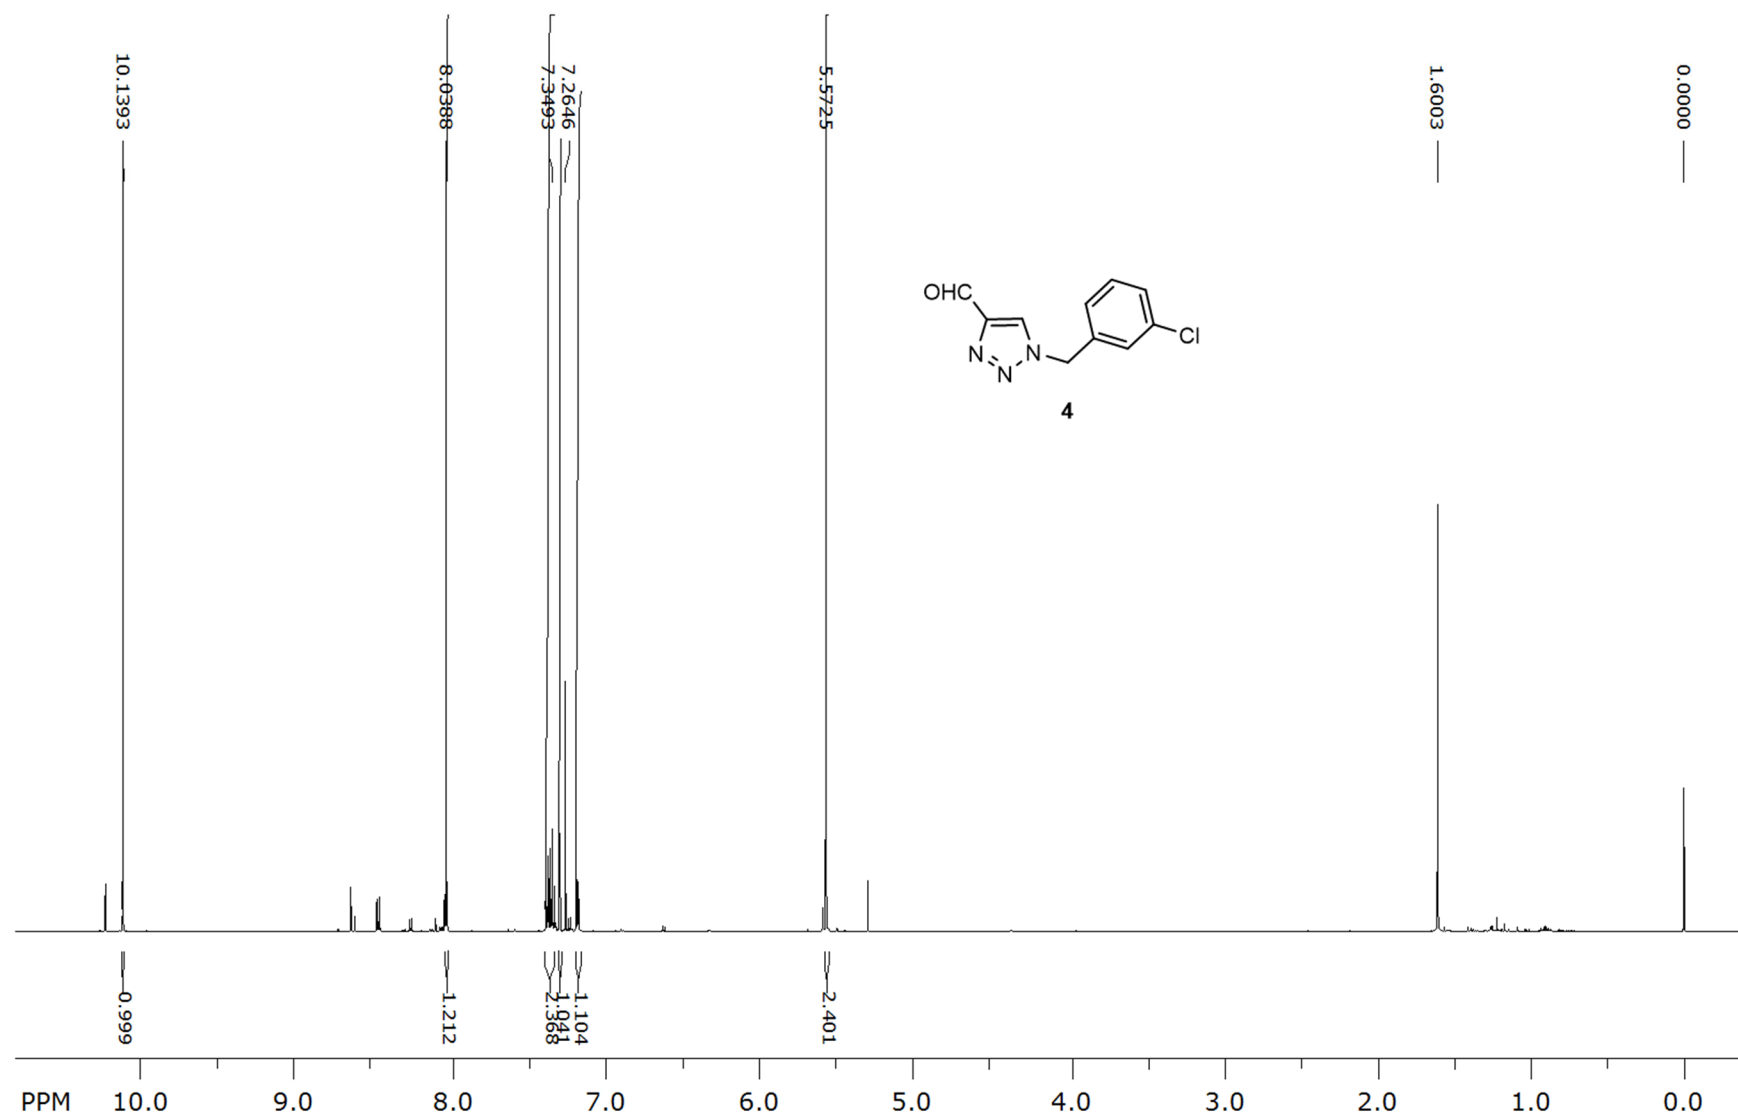

Figure S47.  $^1\text{H}$  NMR ( $\text{CDCl}_3$ ) spectrum of **4**.

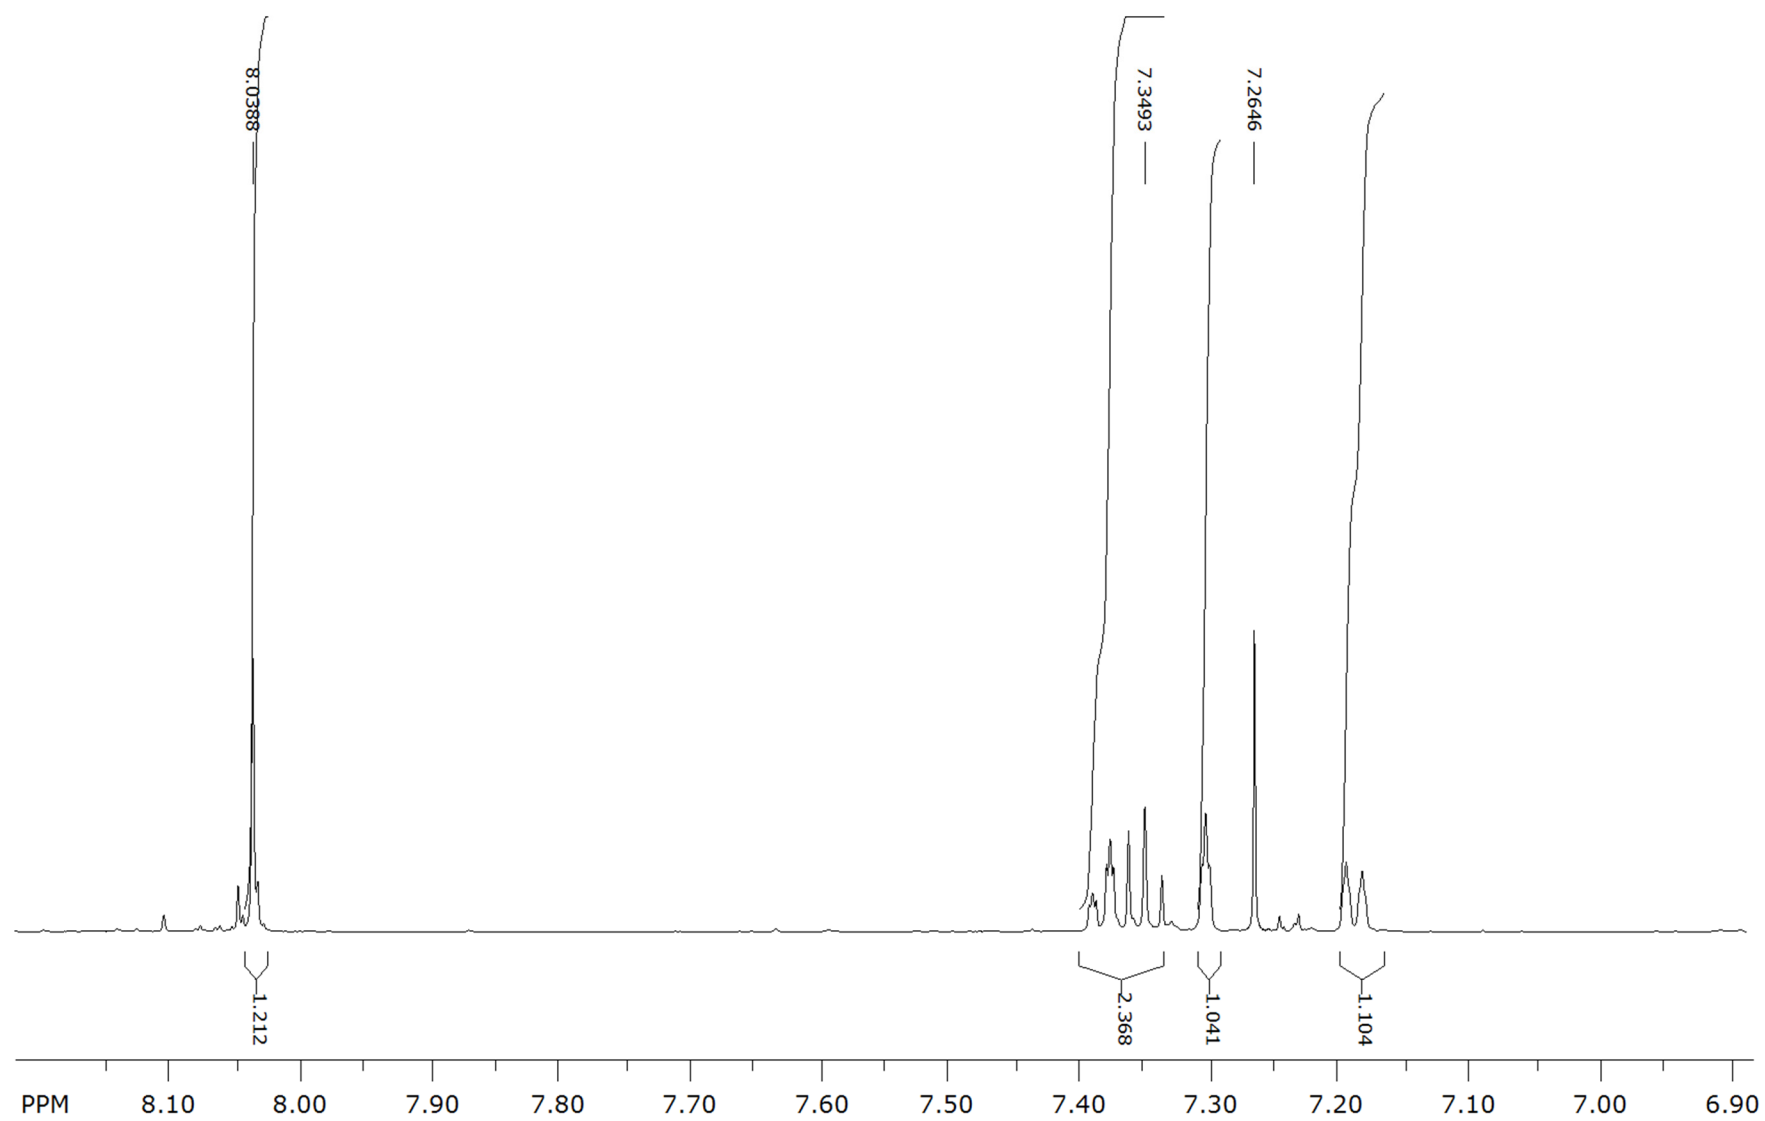

Figure S48.  $^1\text{H}$  NMR ( $\text{CDCl}_3$ ) spectrum of aromatic part of **4**.

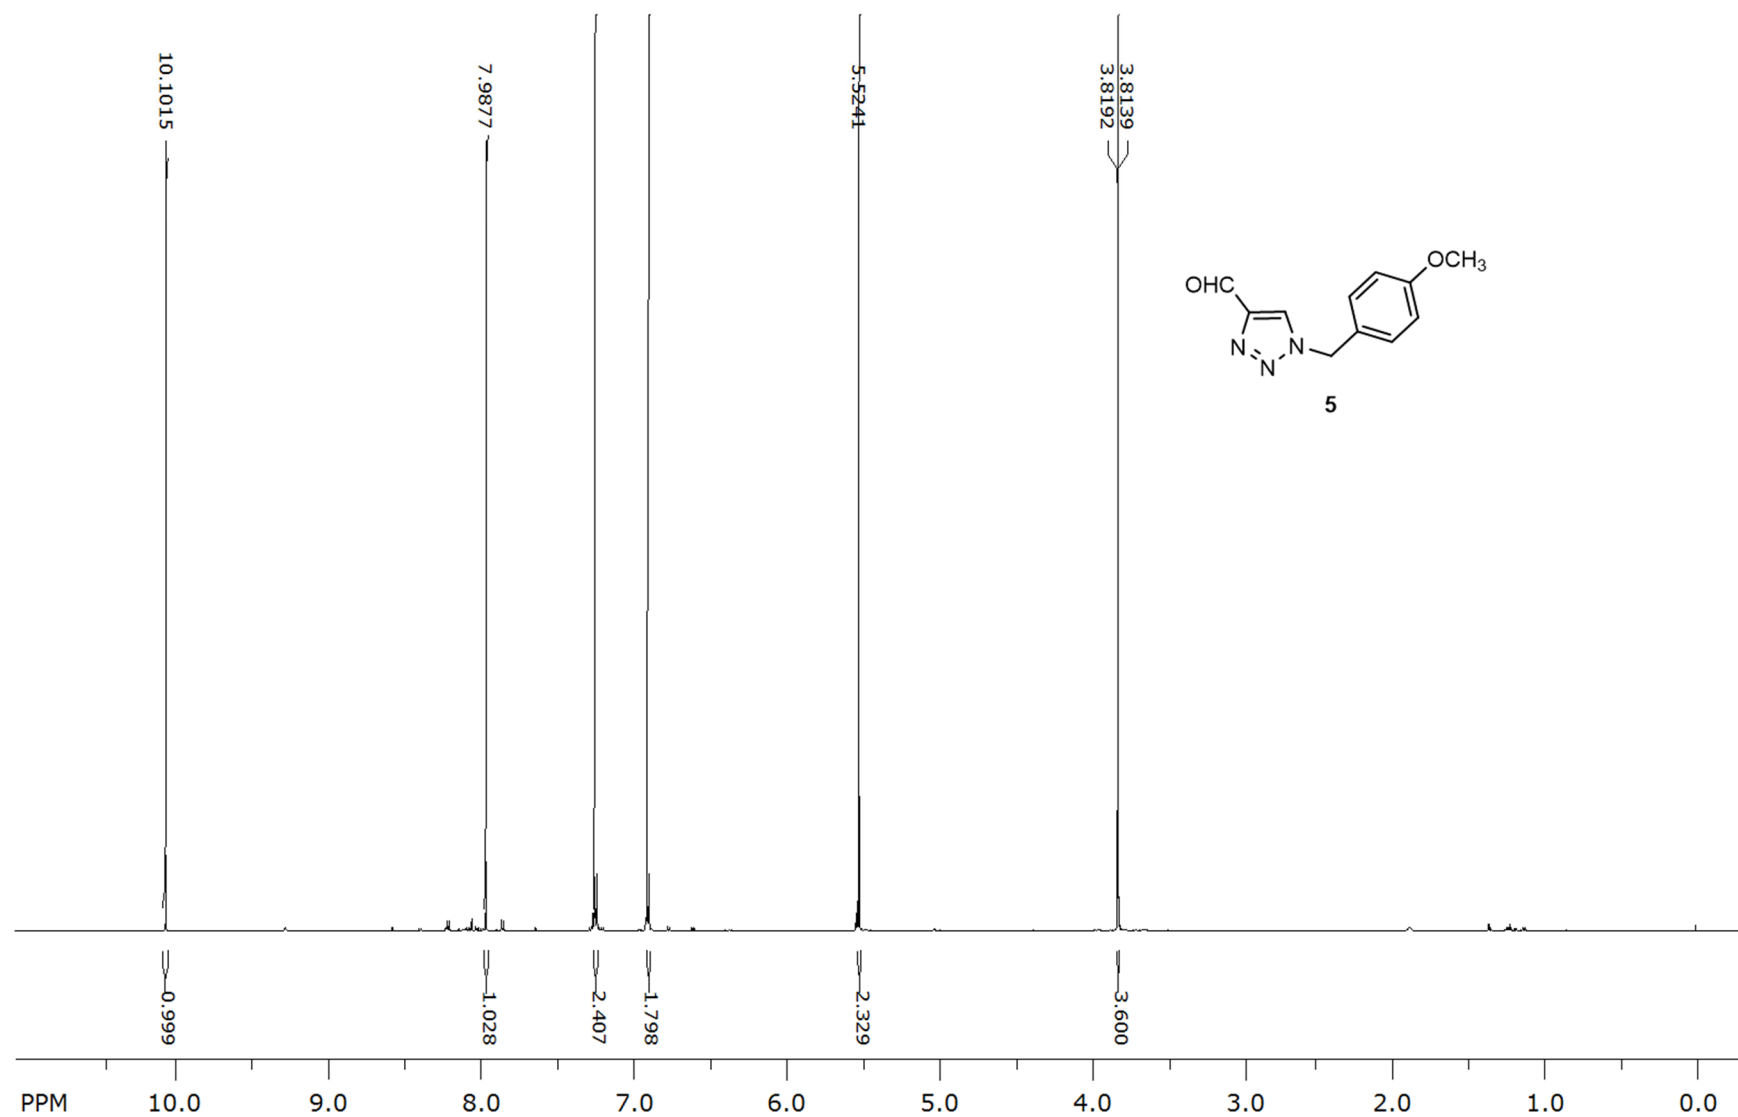

Figure S49.  $^1\text{H}$  NMR ( $\text{CDCl}_3$ ) spectrum of **5**.

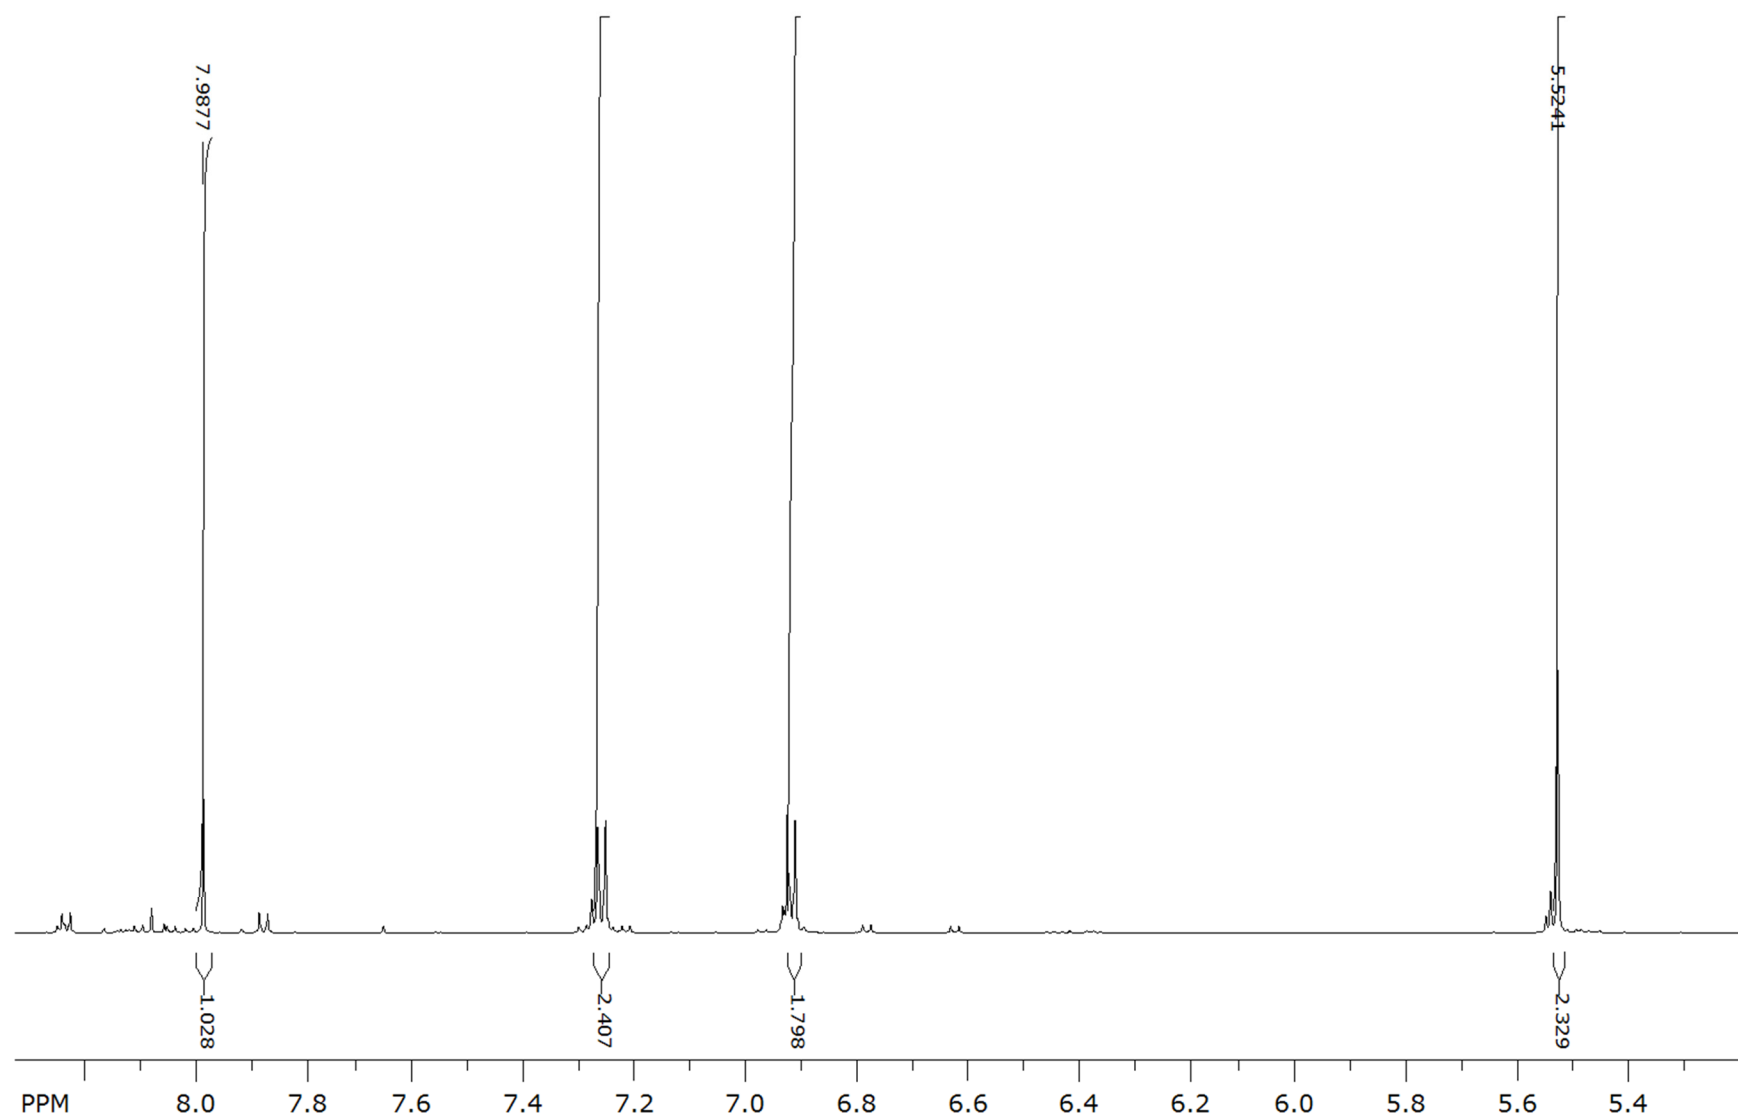

Figure S50.  $^1\text{H}$  NMR ( $\text{CDCl}_3$ ) spectrum of aromatic part of **5**.

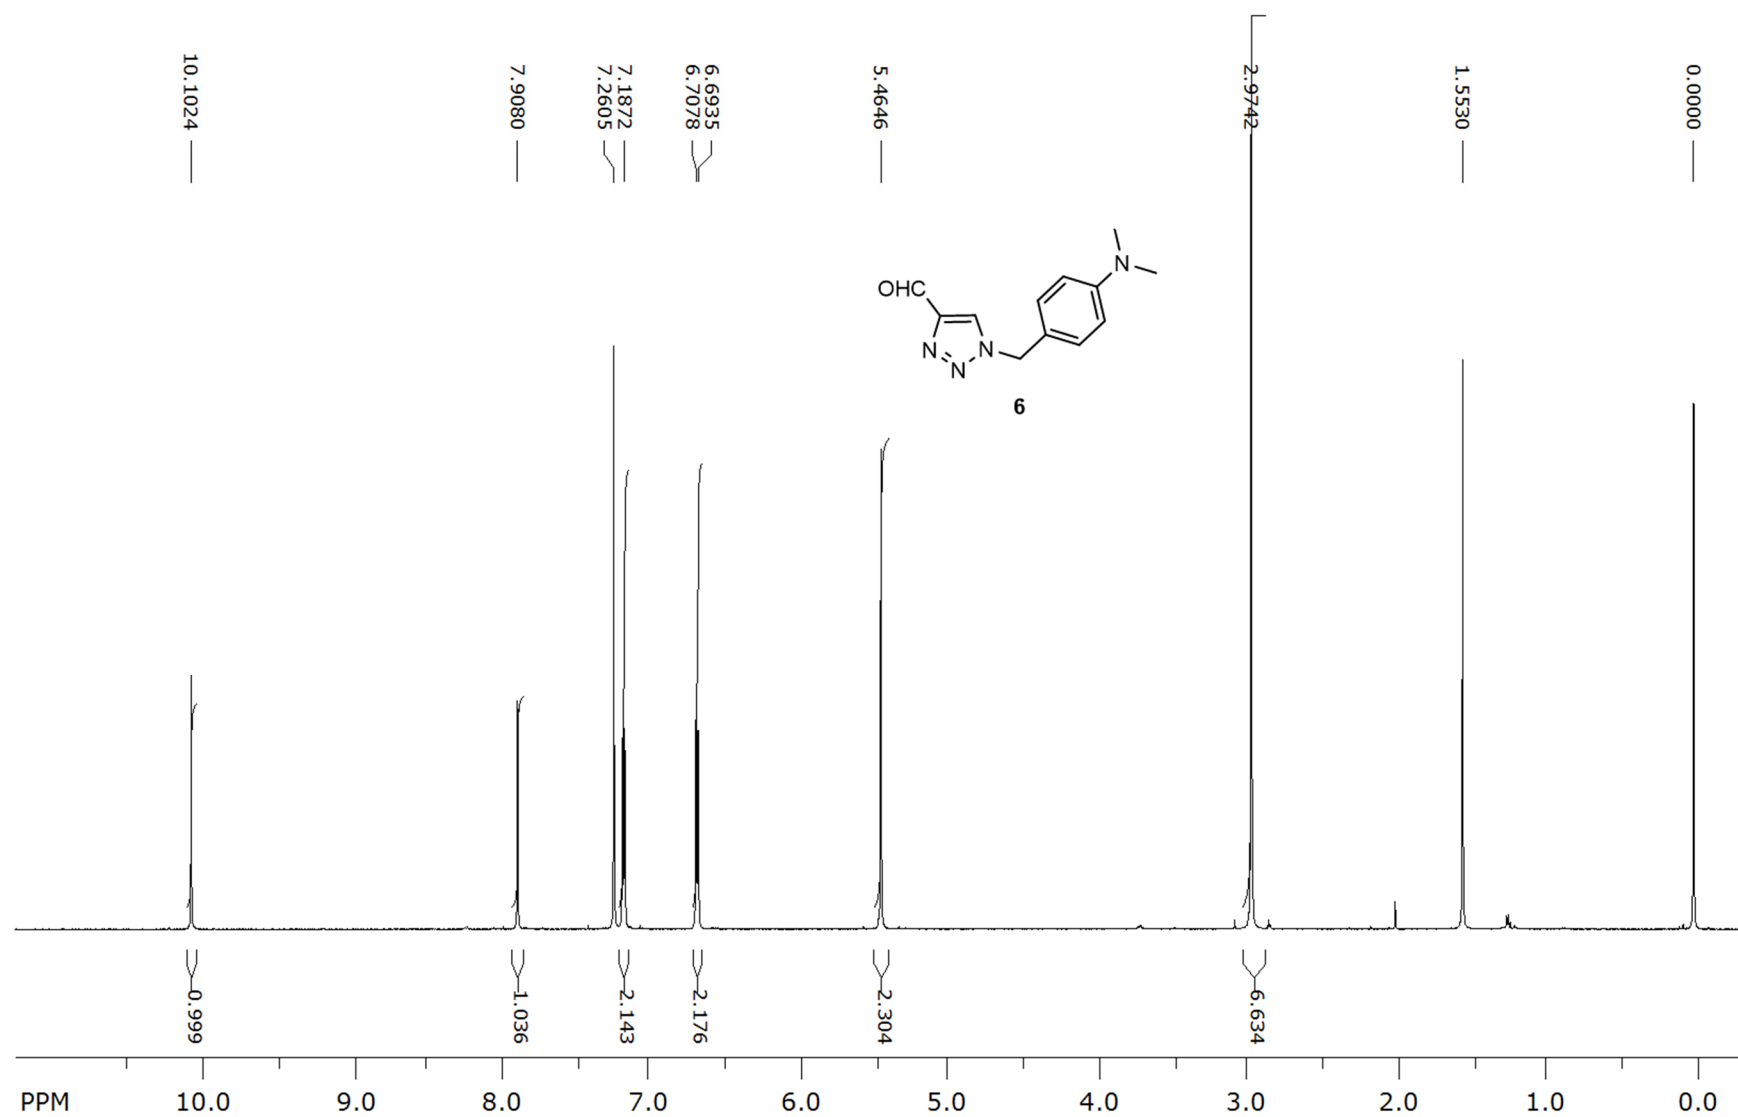

Figure S51.  $^1\text{H}$  NMR ( $\text{CDCl}_3$ ) spectrum of **6**.



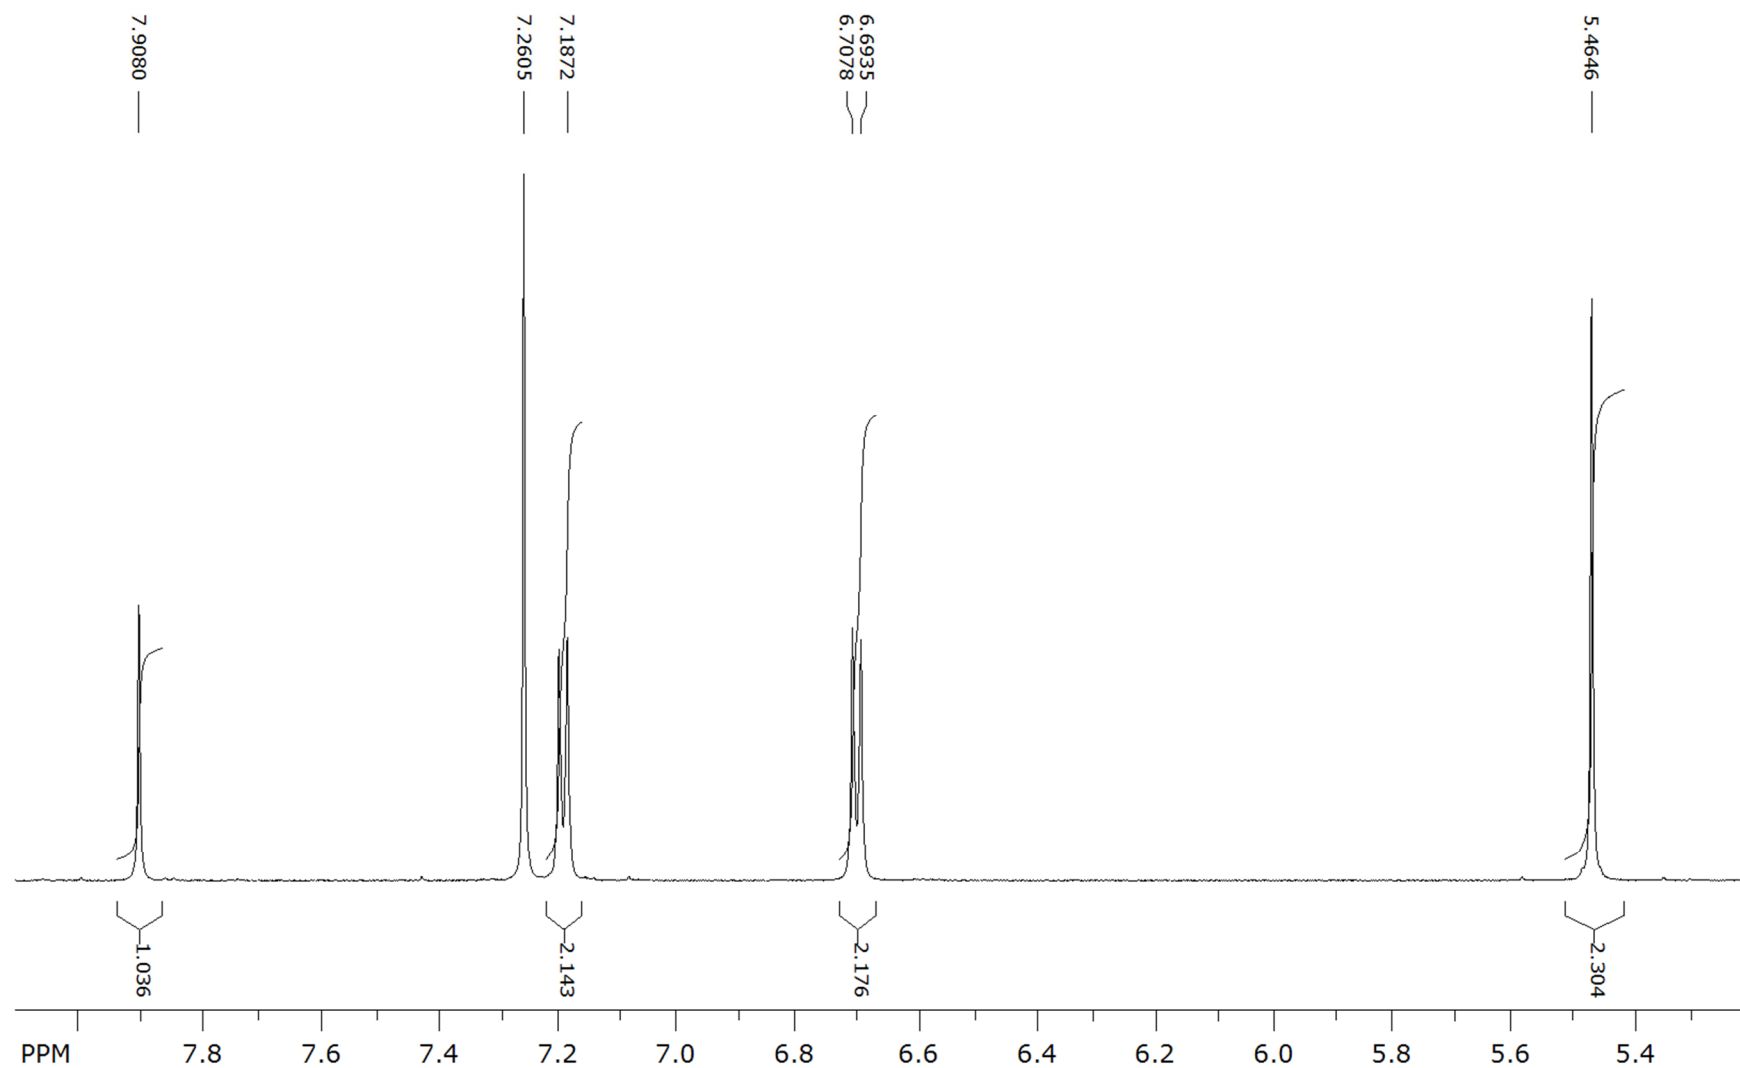

Figure S52.  $^1\text{H}$  NMR ( $\text{CDCl}_3$ ) spectrum of aromatic part of **6**.

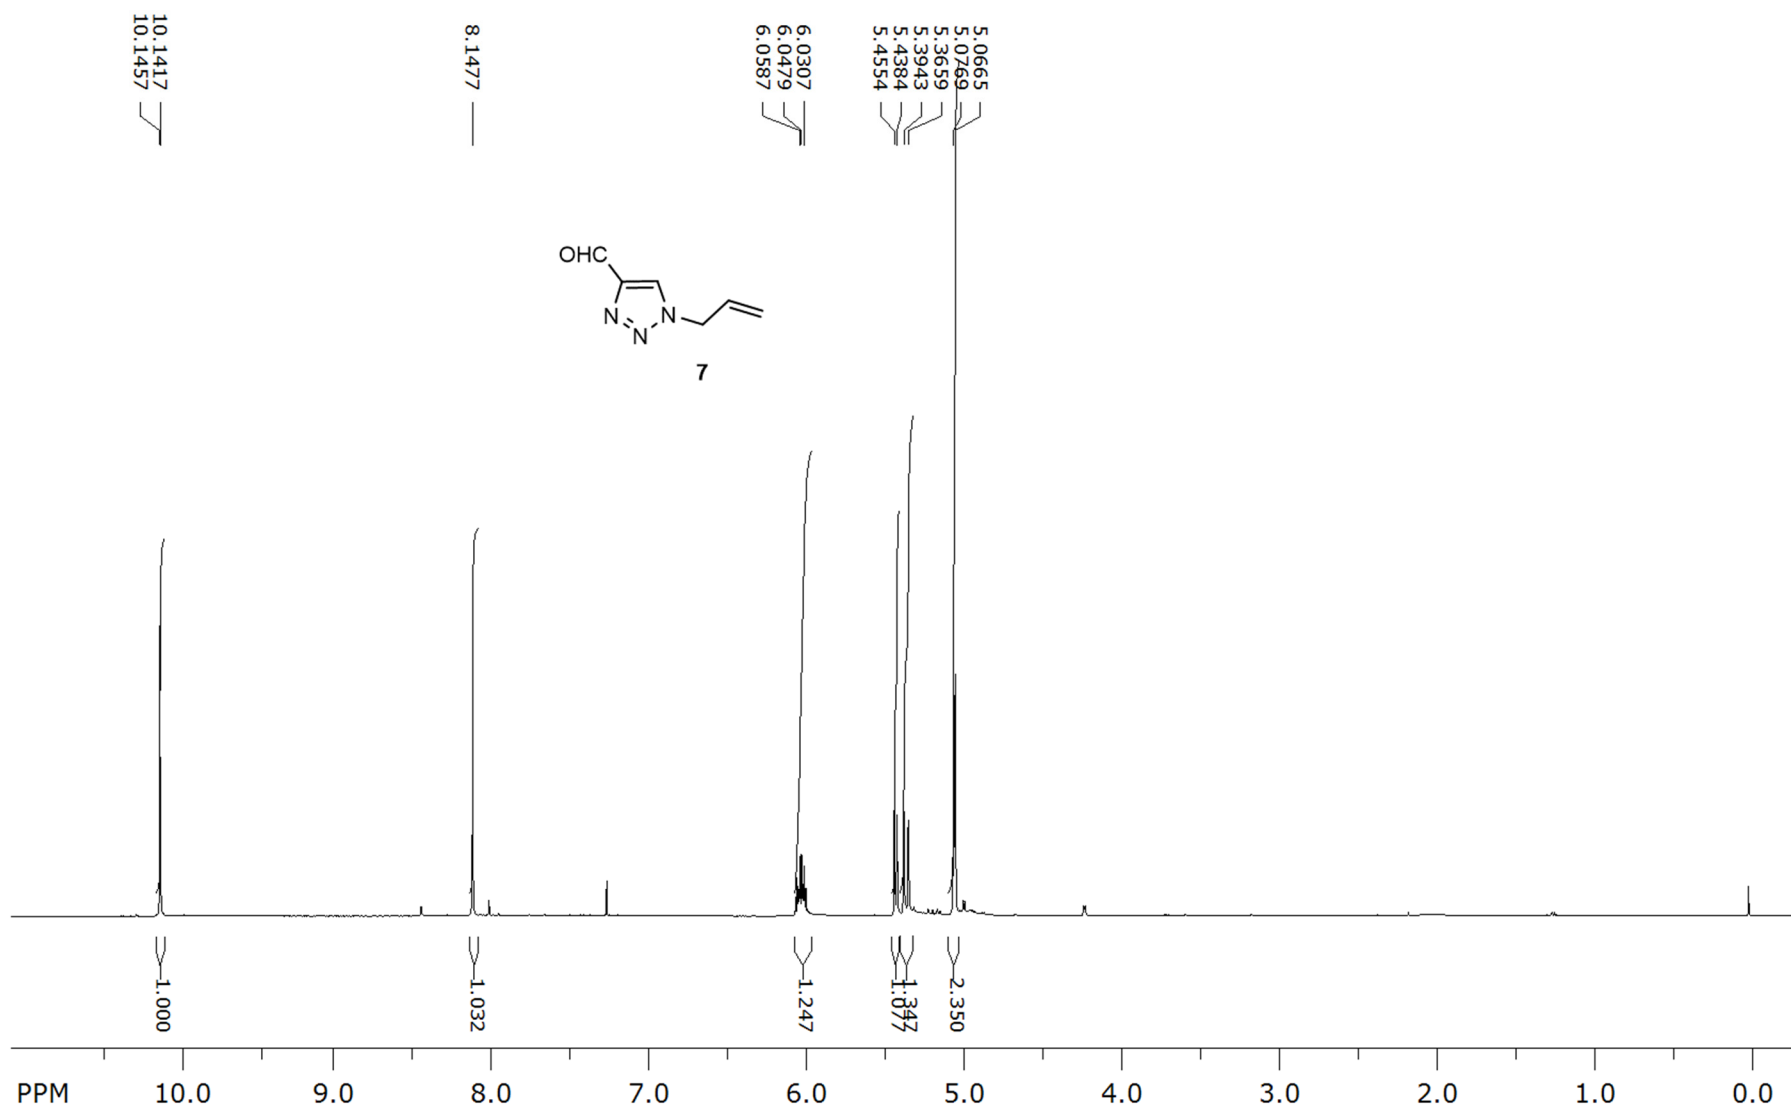

Figure S53. <sup>1</sup>H NMR (CDCl<sub>3</sub>) spectrum of 7.

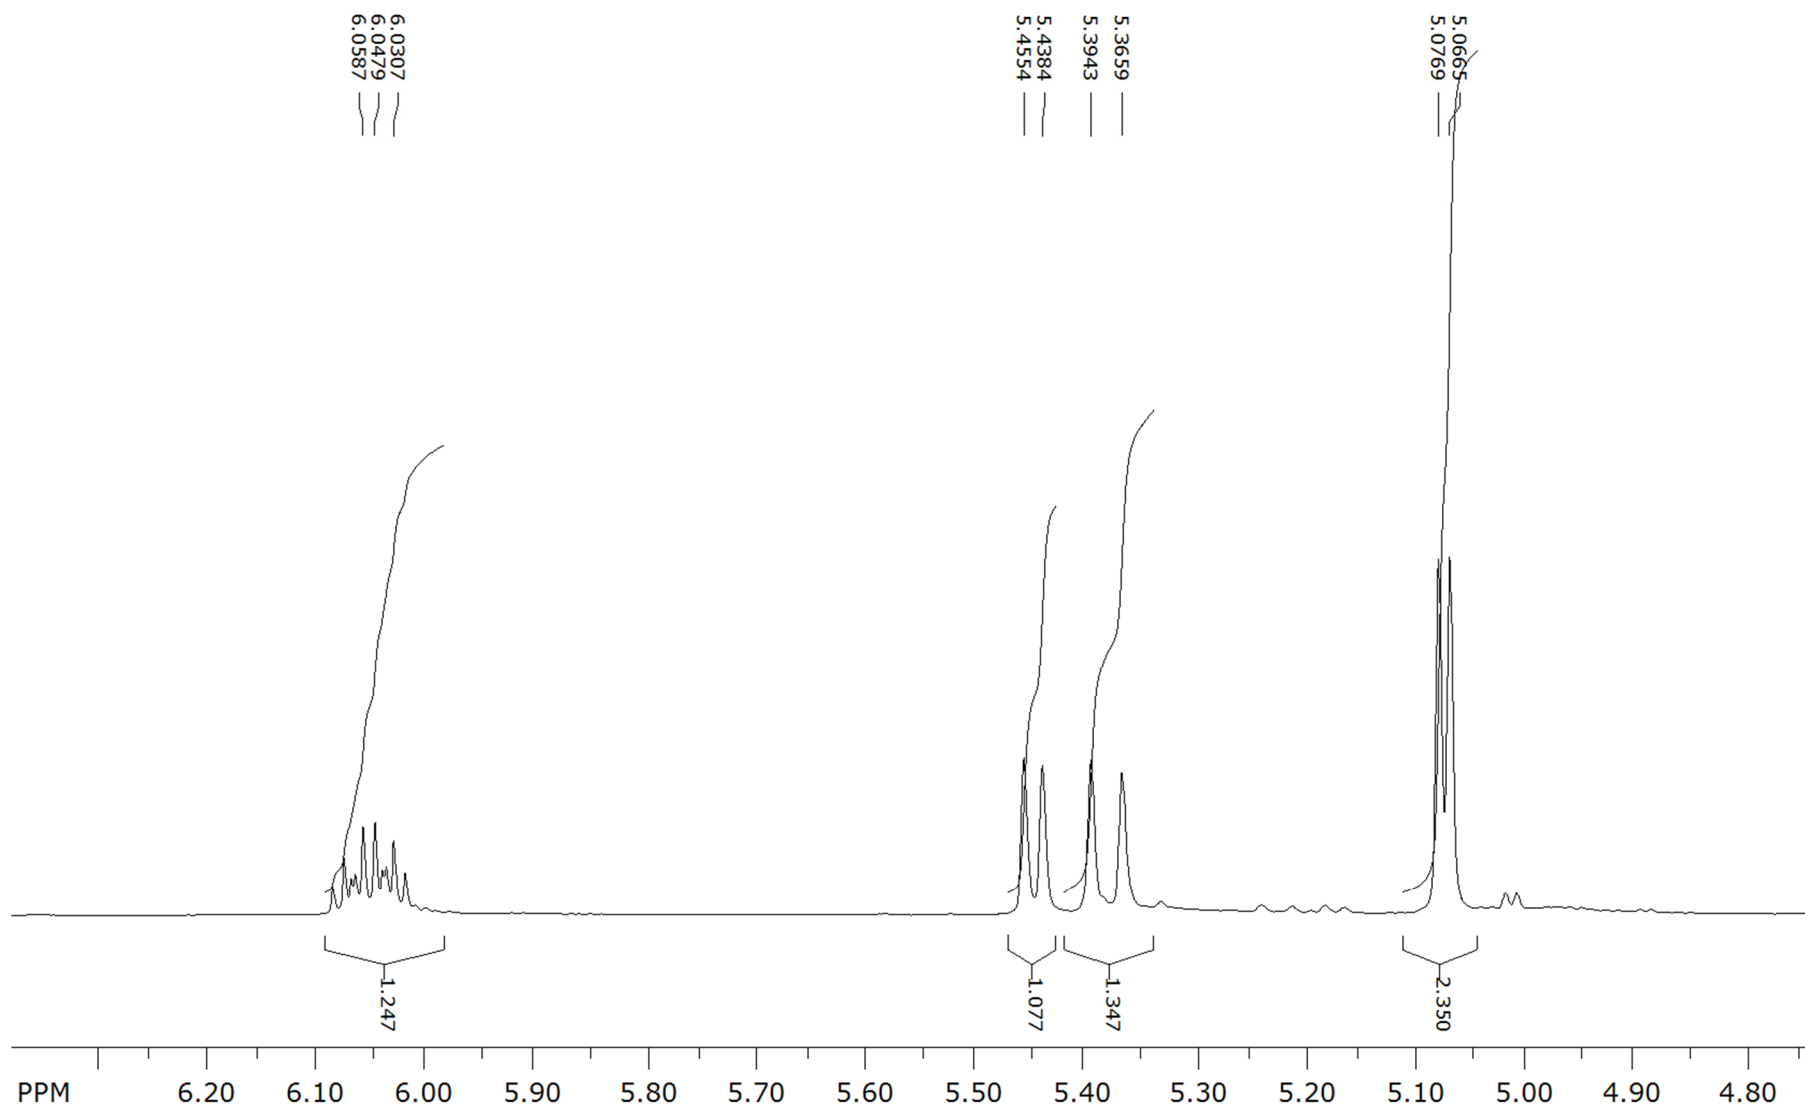

Figure S54. <sup>1</sup>H NMR (CDCl<sub>3</sub>) spectrum of aliphatic part of 7.

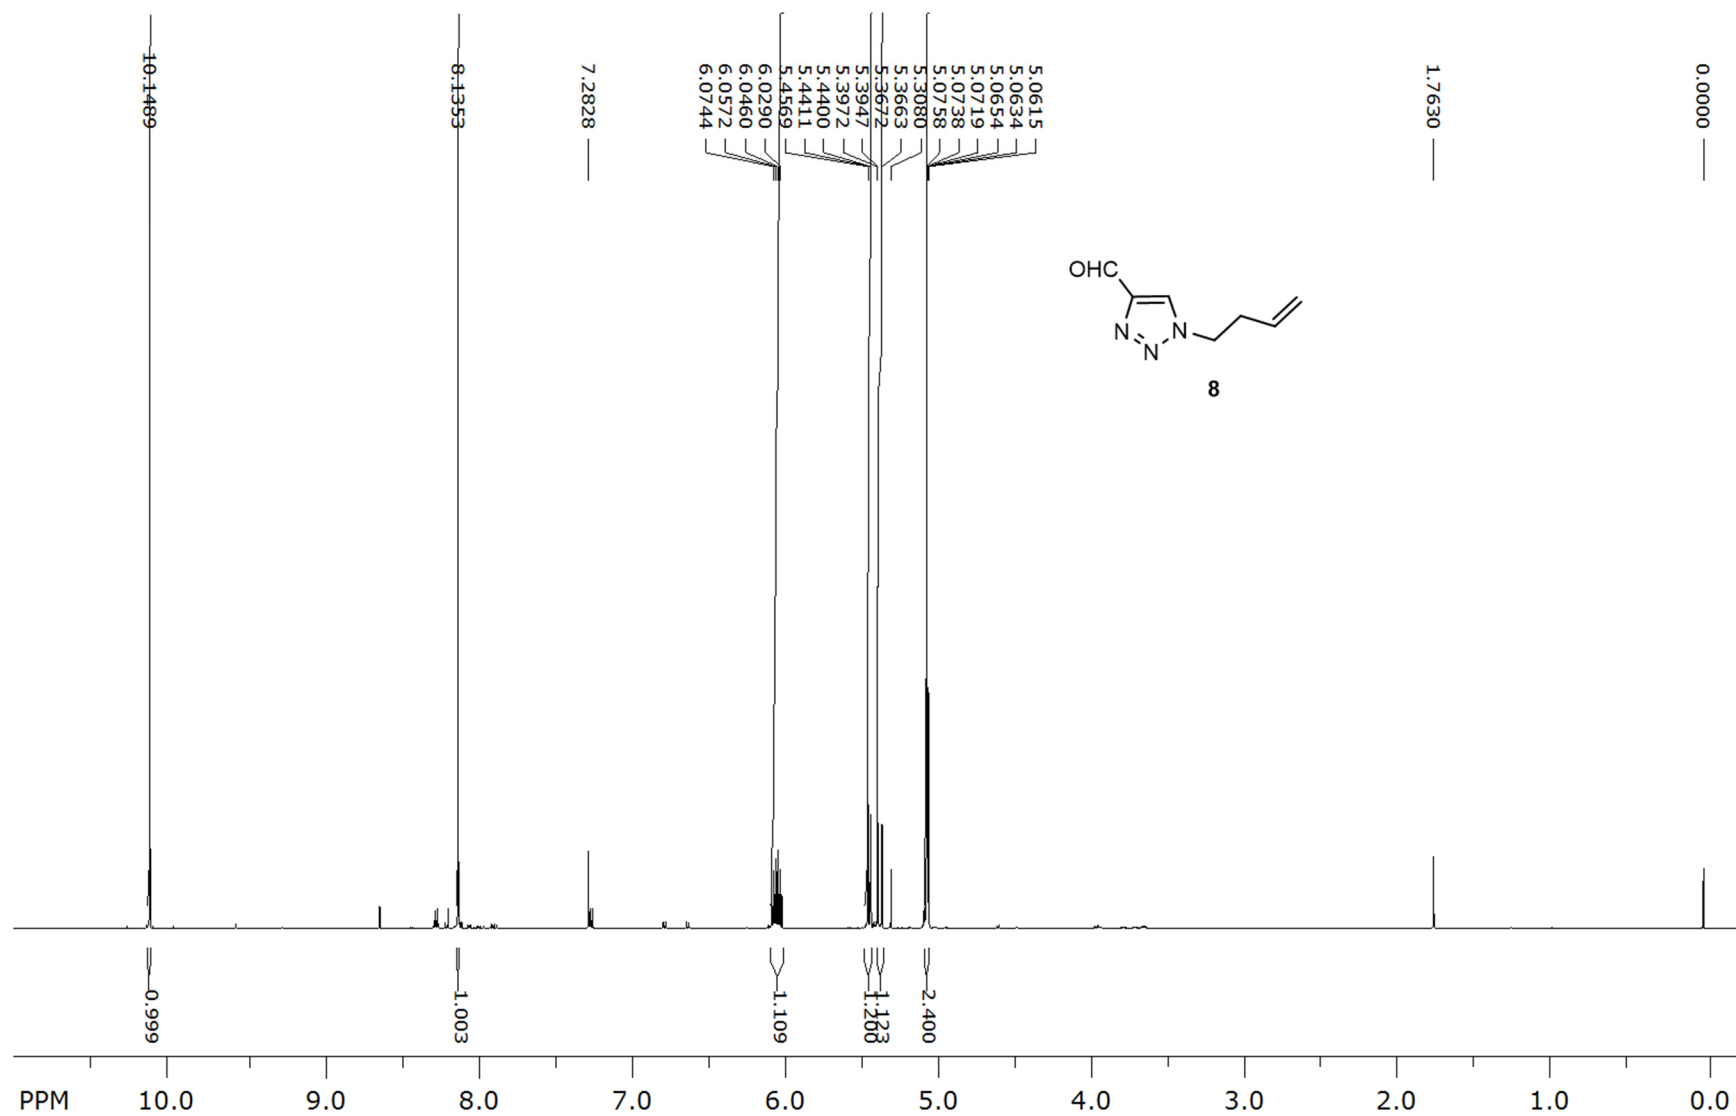

Figure S55.  $^1\text{H}$  NMR ( $\text{CDCl}_3$ ) spectrum of **8**.

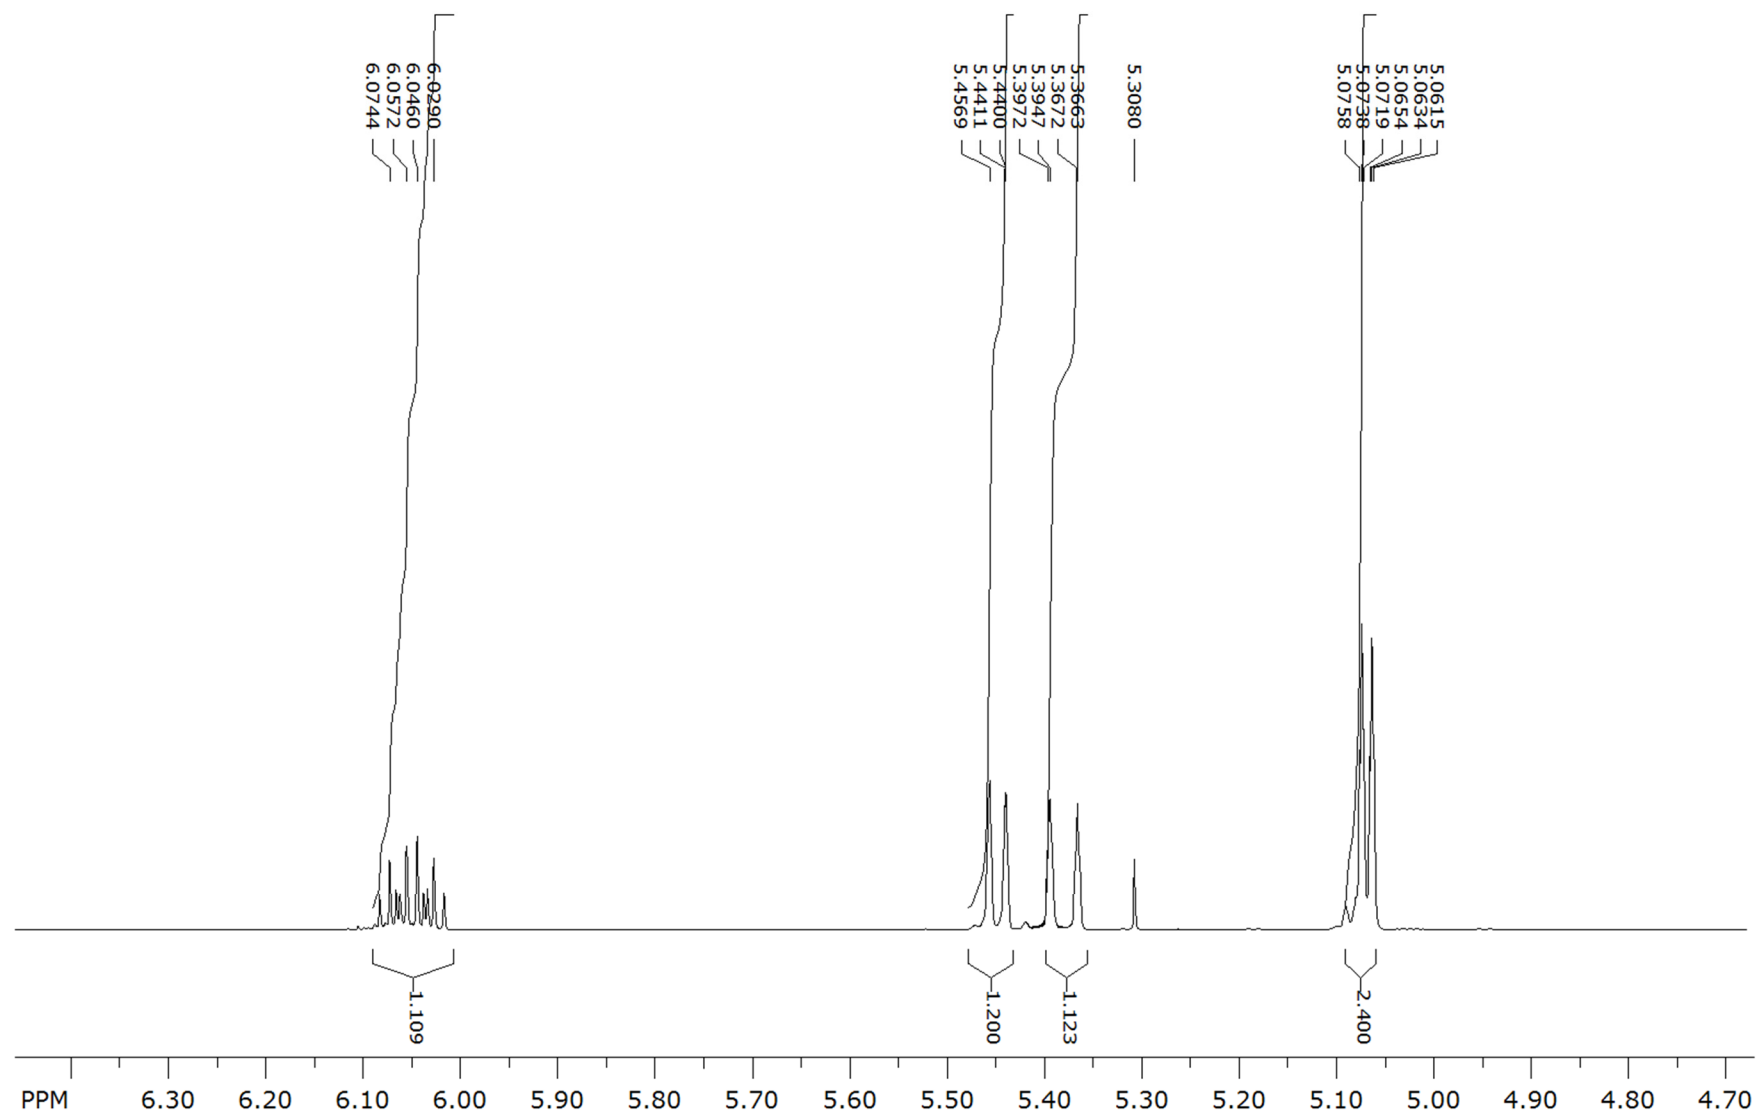

Figure S56. <sup>1</sup>H NMR (CDCl<sub>3</sub>) spectrum of aliphatic part of **8**.

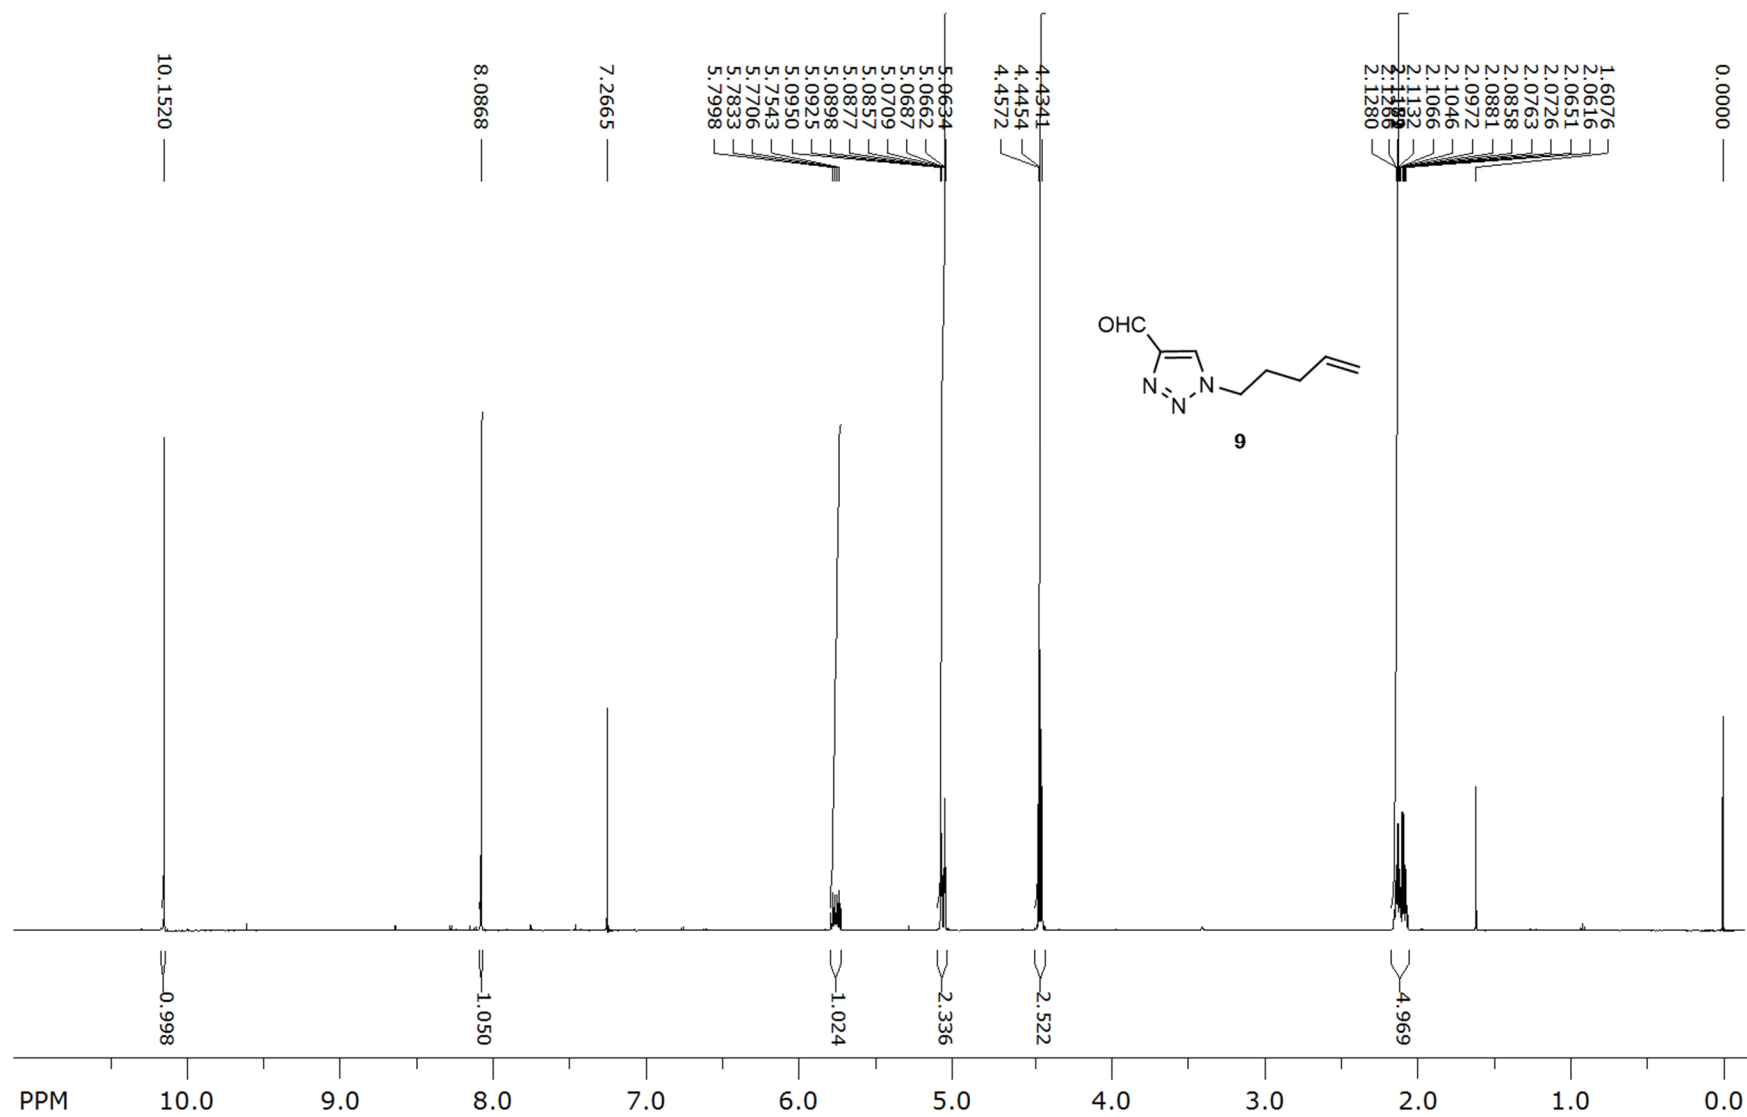

Figure S57.  $^1\text{H}$  NMR ( $\text{CDCl}_3$ ) spectrum of **9**.

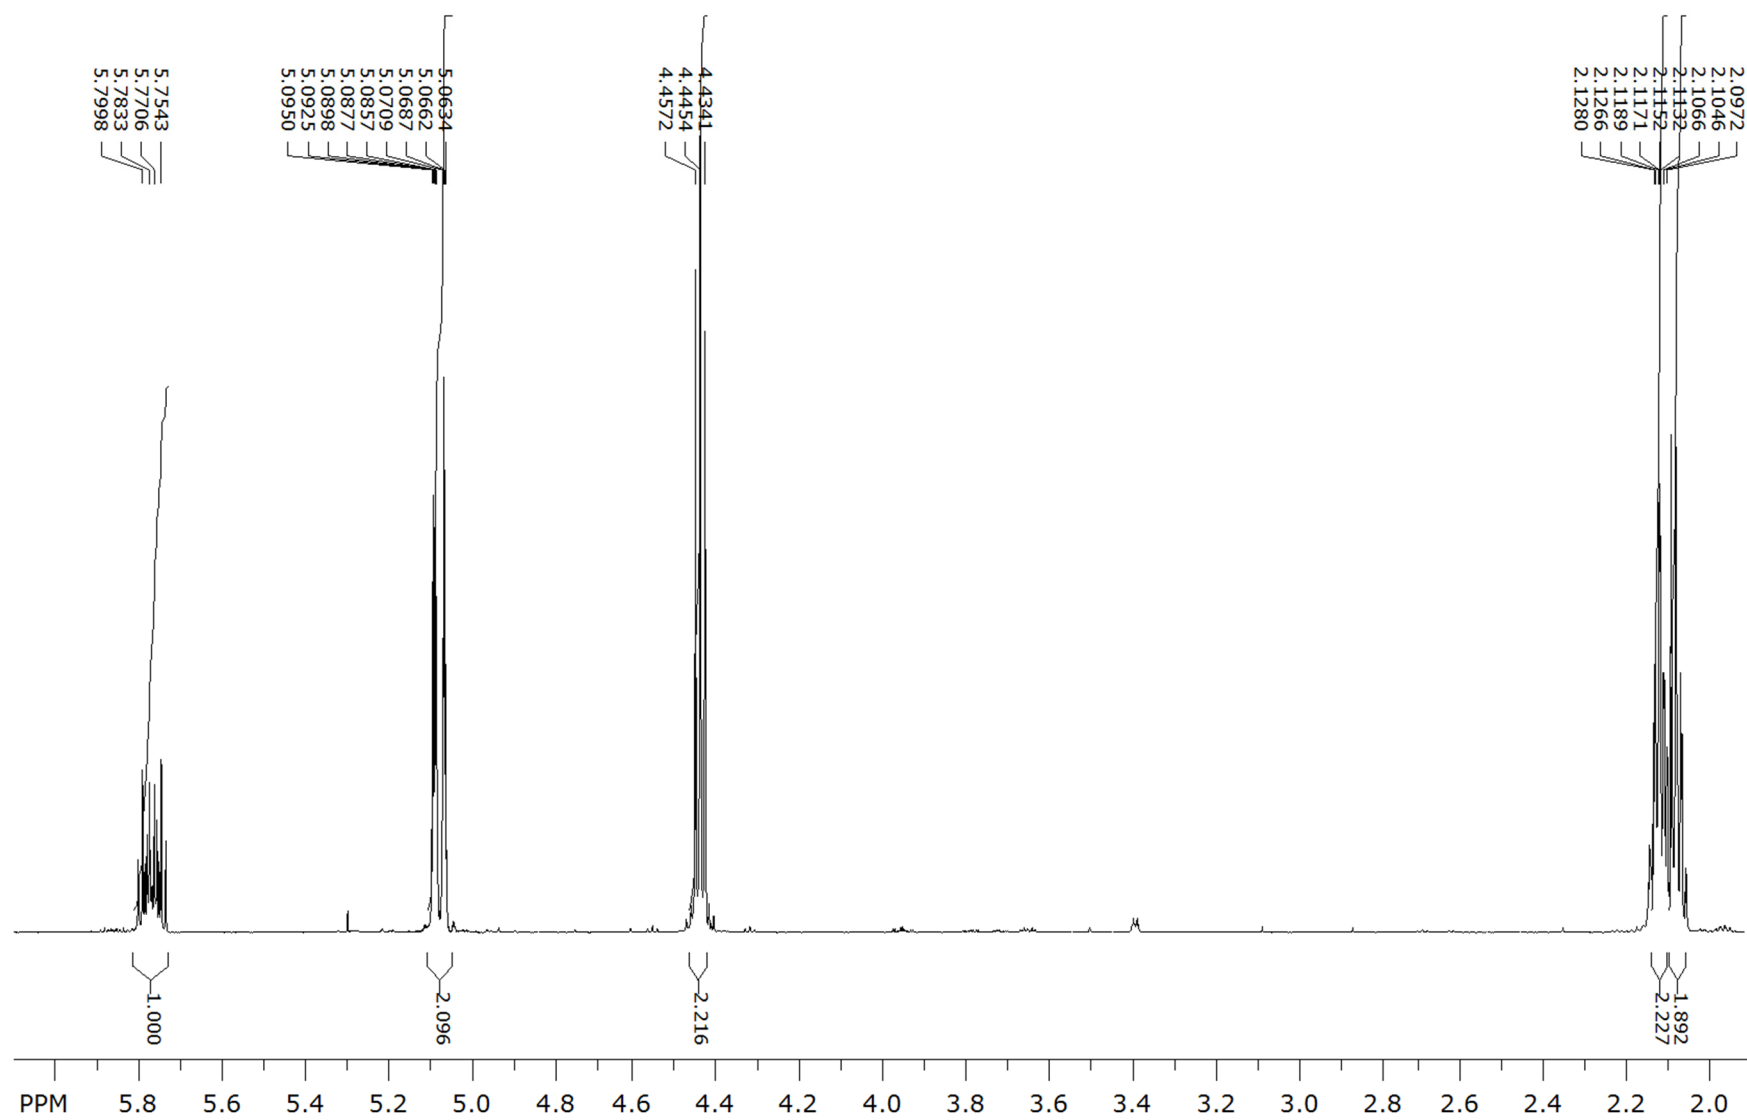

Figure S58.  $^1\text{H}$  NMR ( $\text{CDCl}_3$ ) spectrum of aliphatic part of **9**.

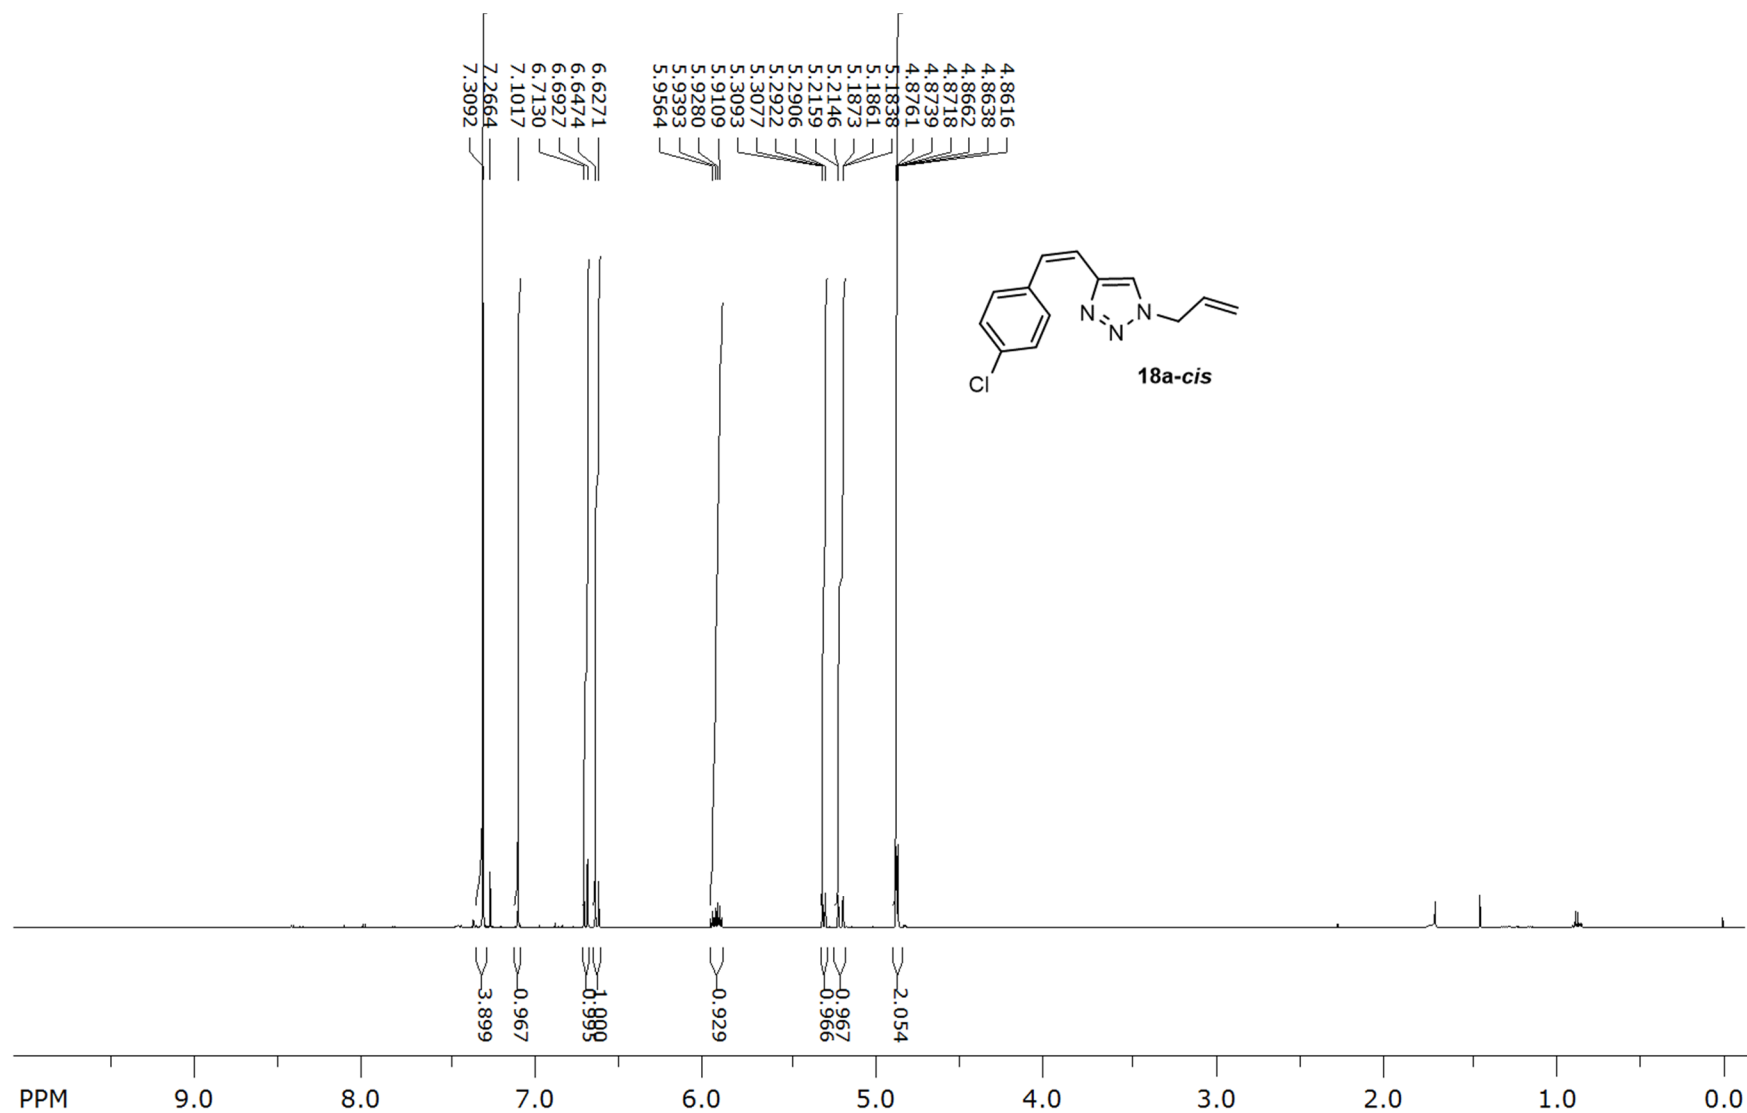

Figure S59.  $^1\text{H}$  NMR ( $\text{CDCl}_3$ ) spectrum of *cis*-18.



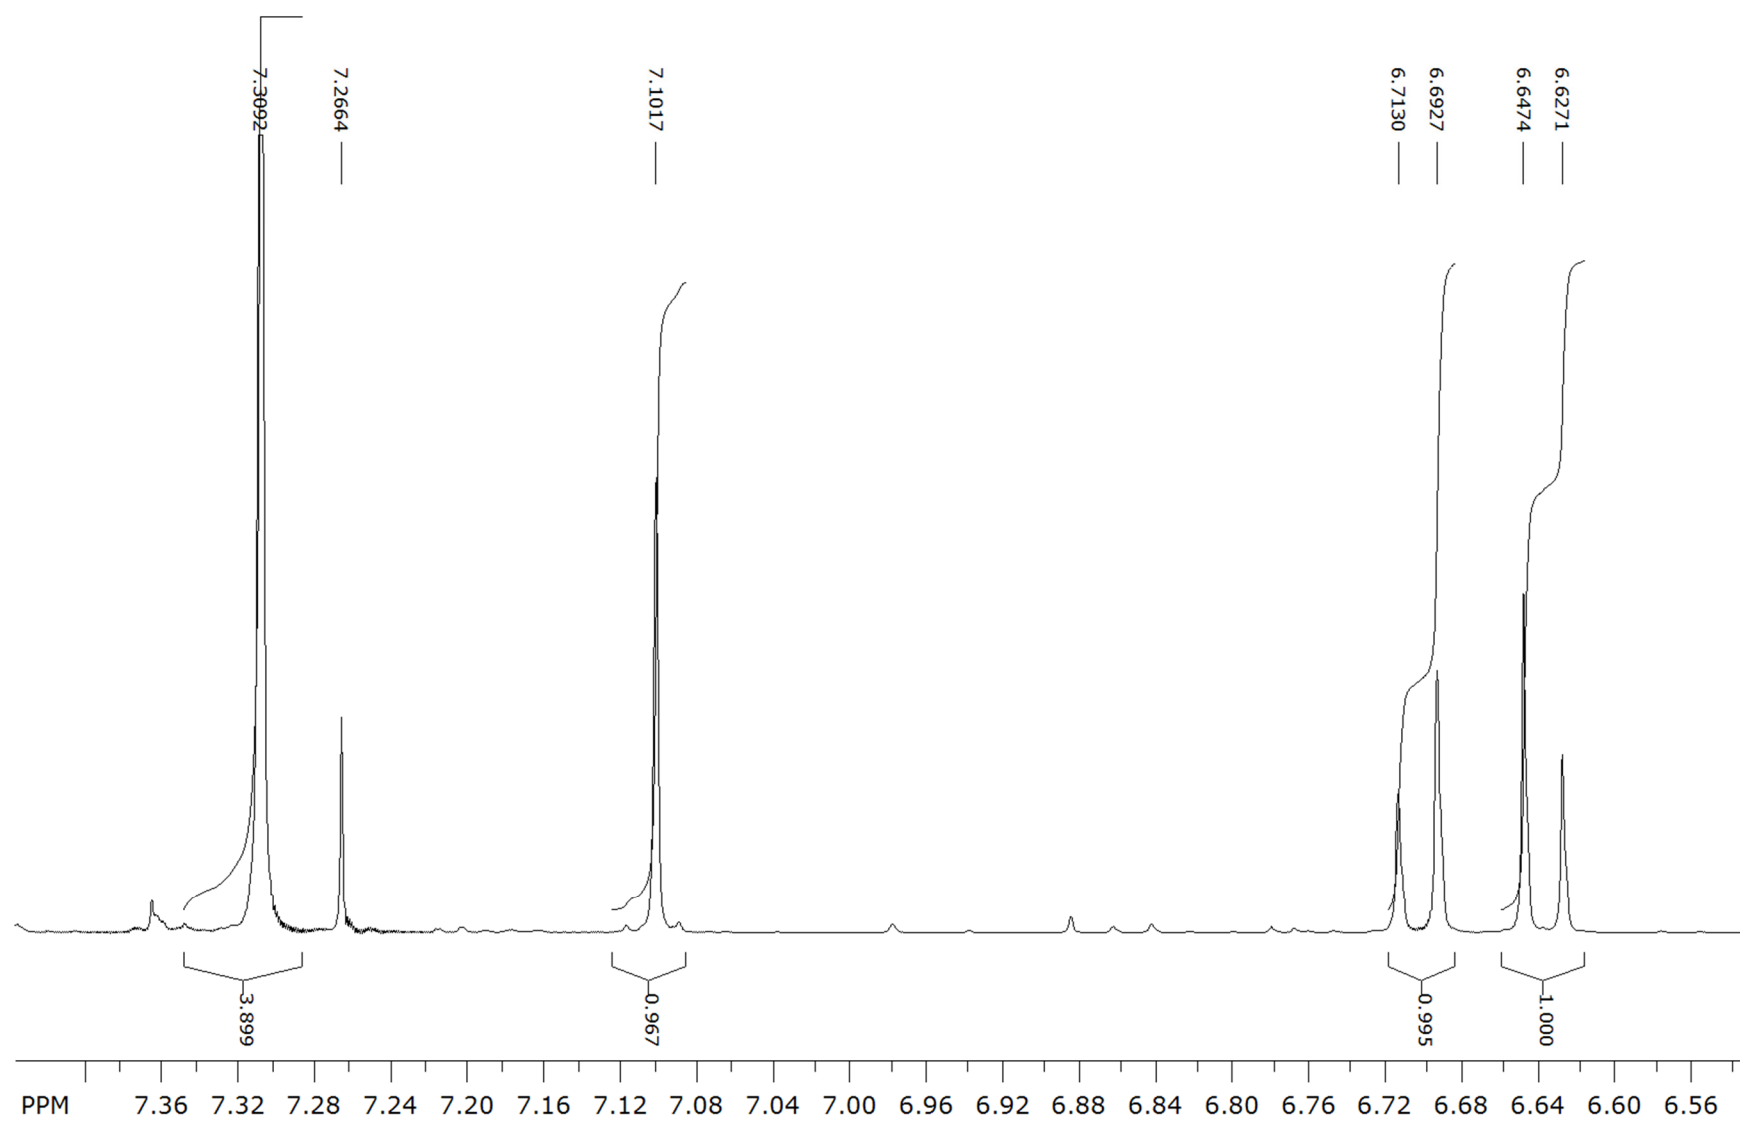

Figure S60.  $^1\text{H}$  NMR ( $\text{CDCl}_3$ ) spectrum of aromatic part of *cis*-18.

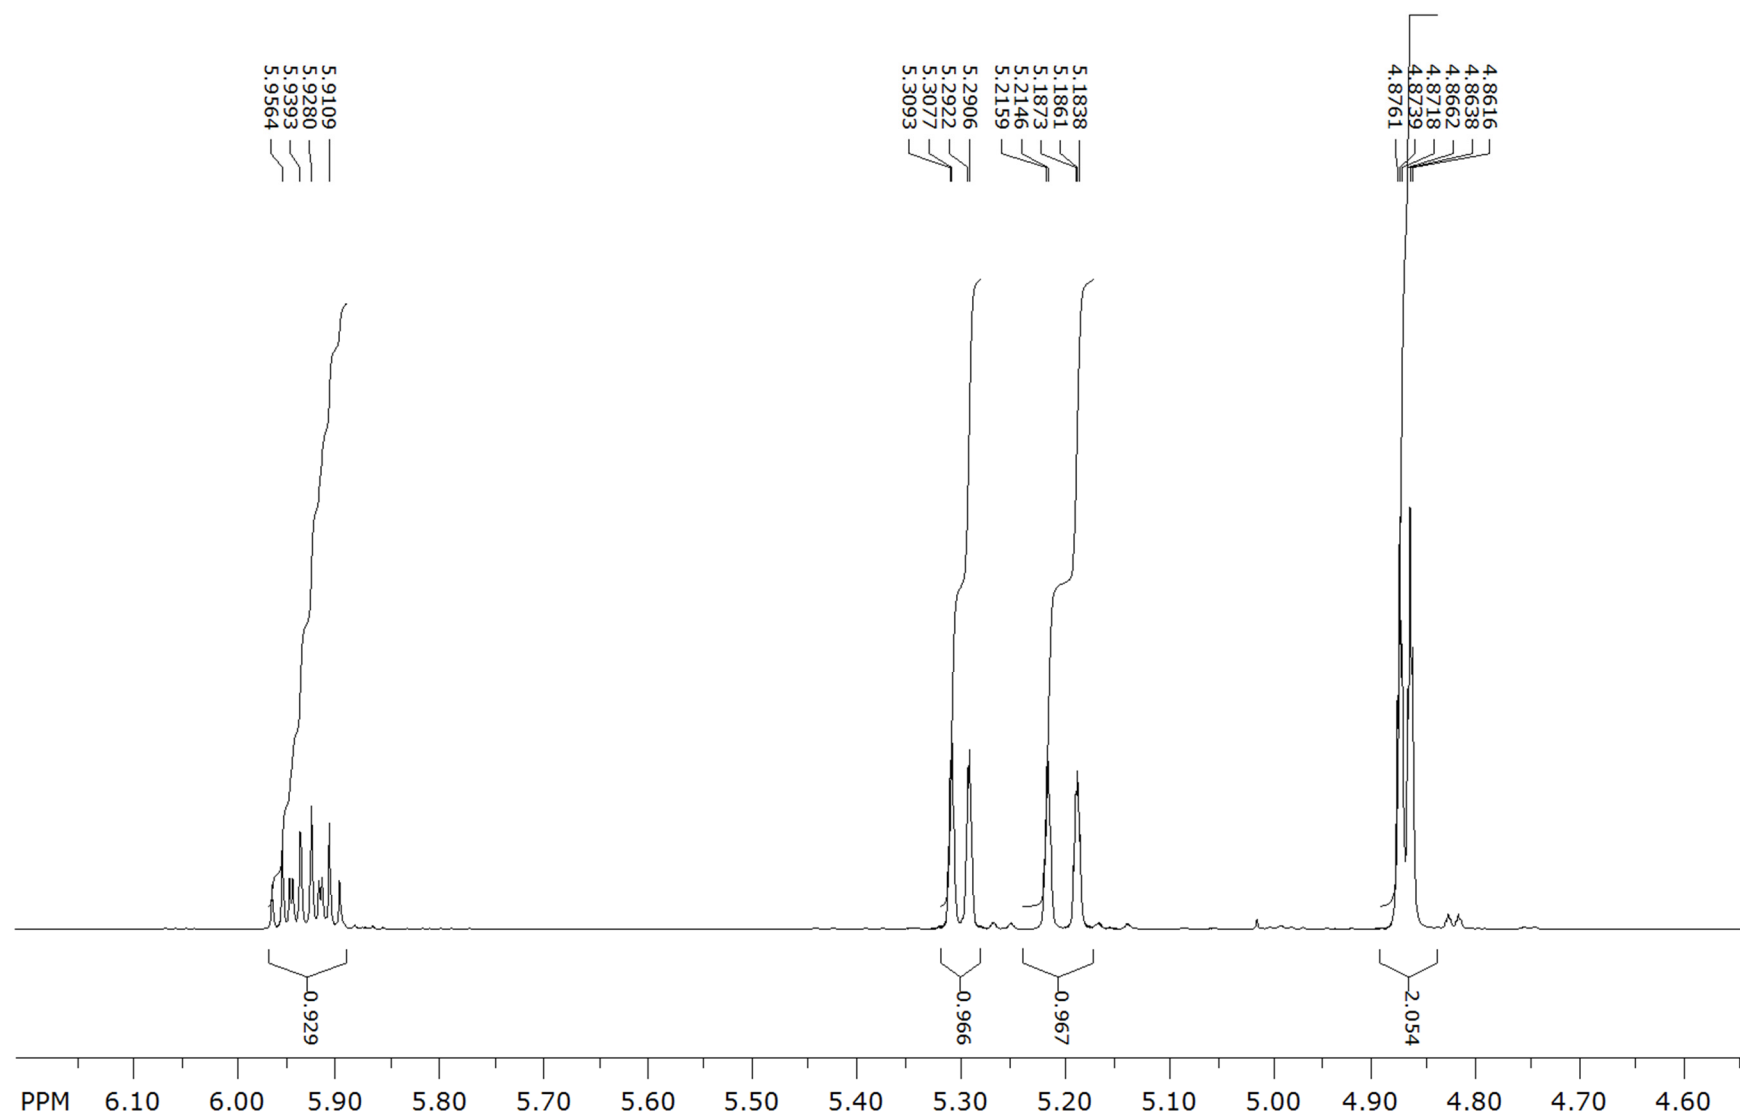

Figure S61.  $^1\text{H}$  NMR ( $\text{CDCl}_3$ ) spectrum of aliphatic part of *cis*-18.

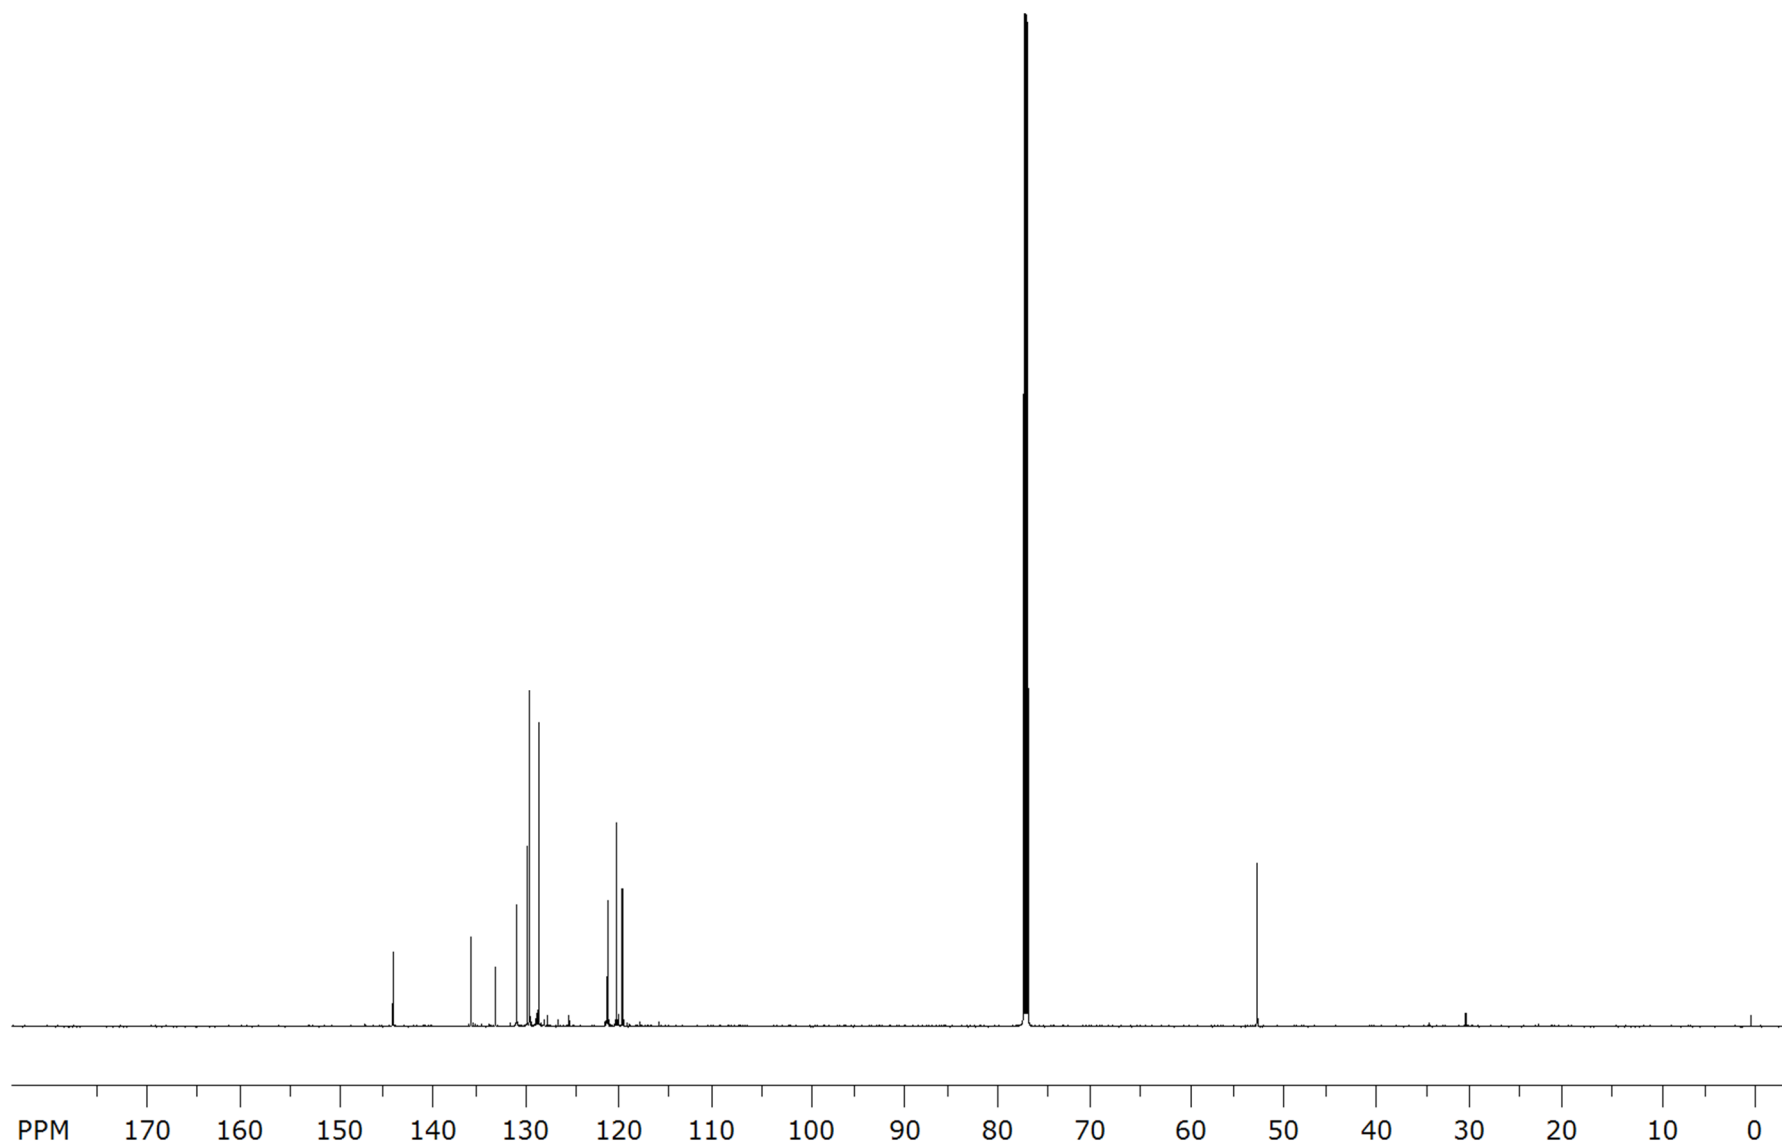

Figure S62.  $^{13}\text{C}$  NMR ( $\text{CDCl}_3$ ) spectrum of *cis*-18 (*Spin Works 3.0*).

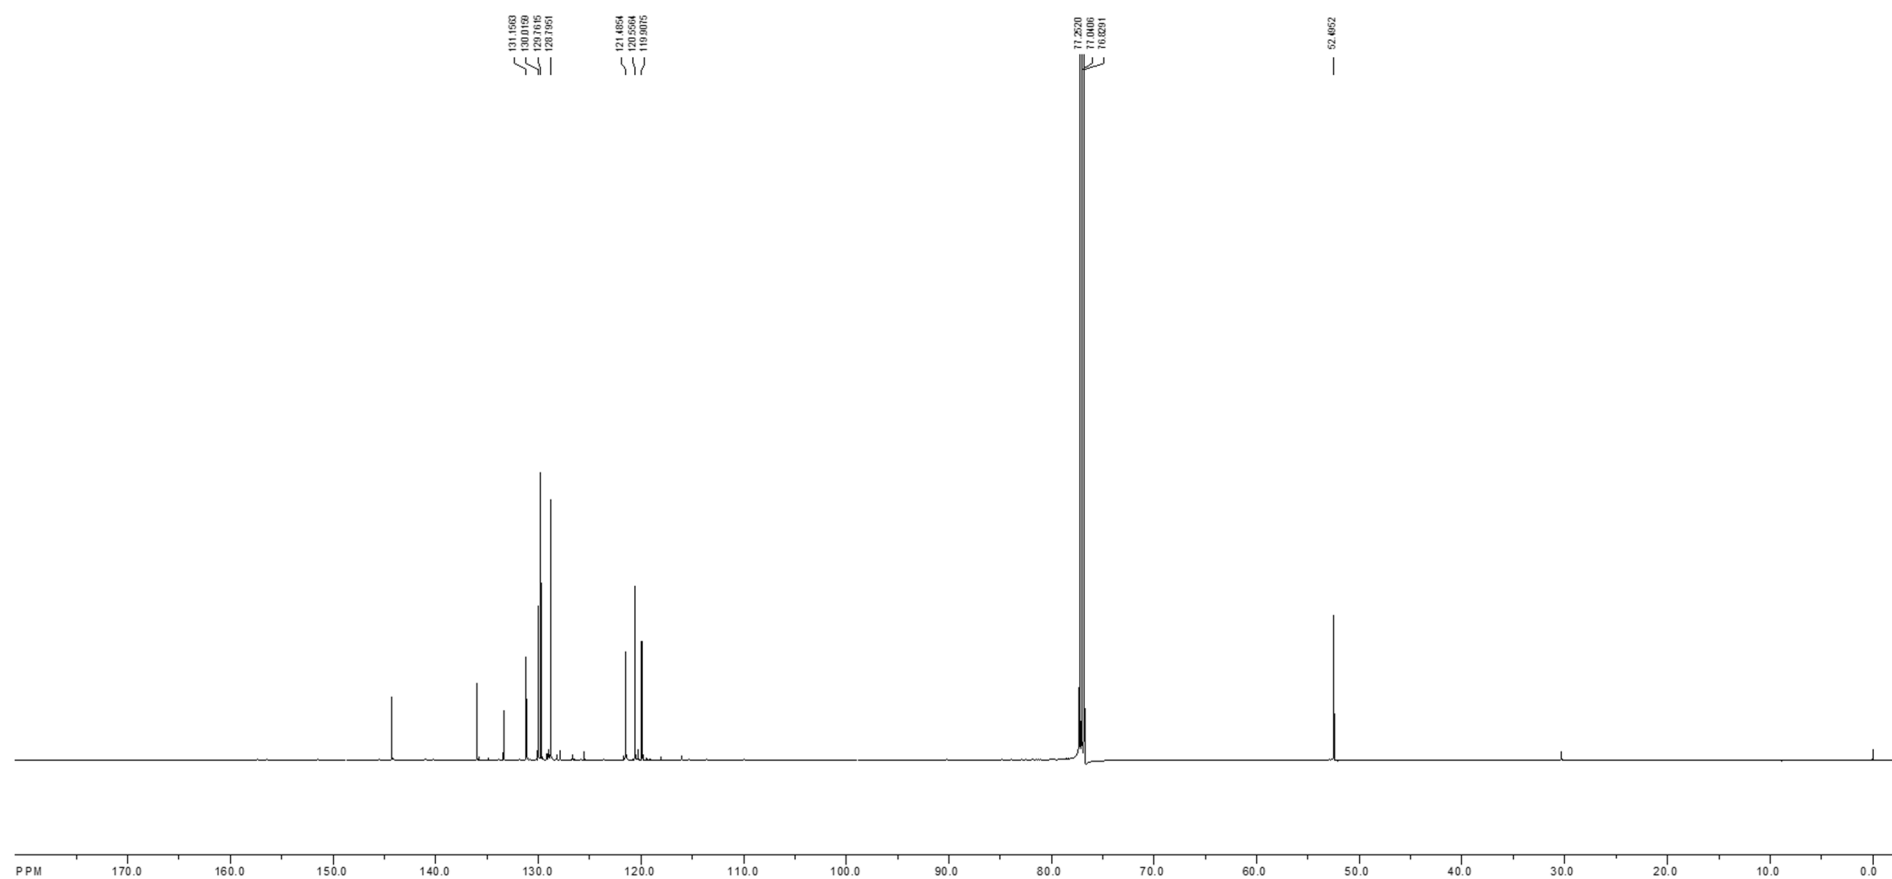

Figure S63.  $^{13}\text{C}$  NMR ( $\text{CDCl}_3$ ) spectrum of *cis*-18 (*Spin Works 2.5.5.*).

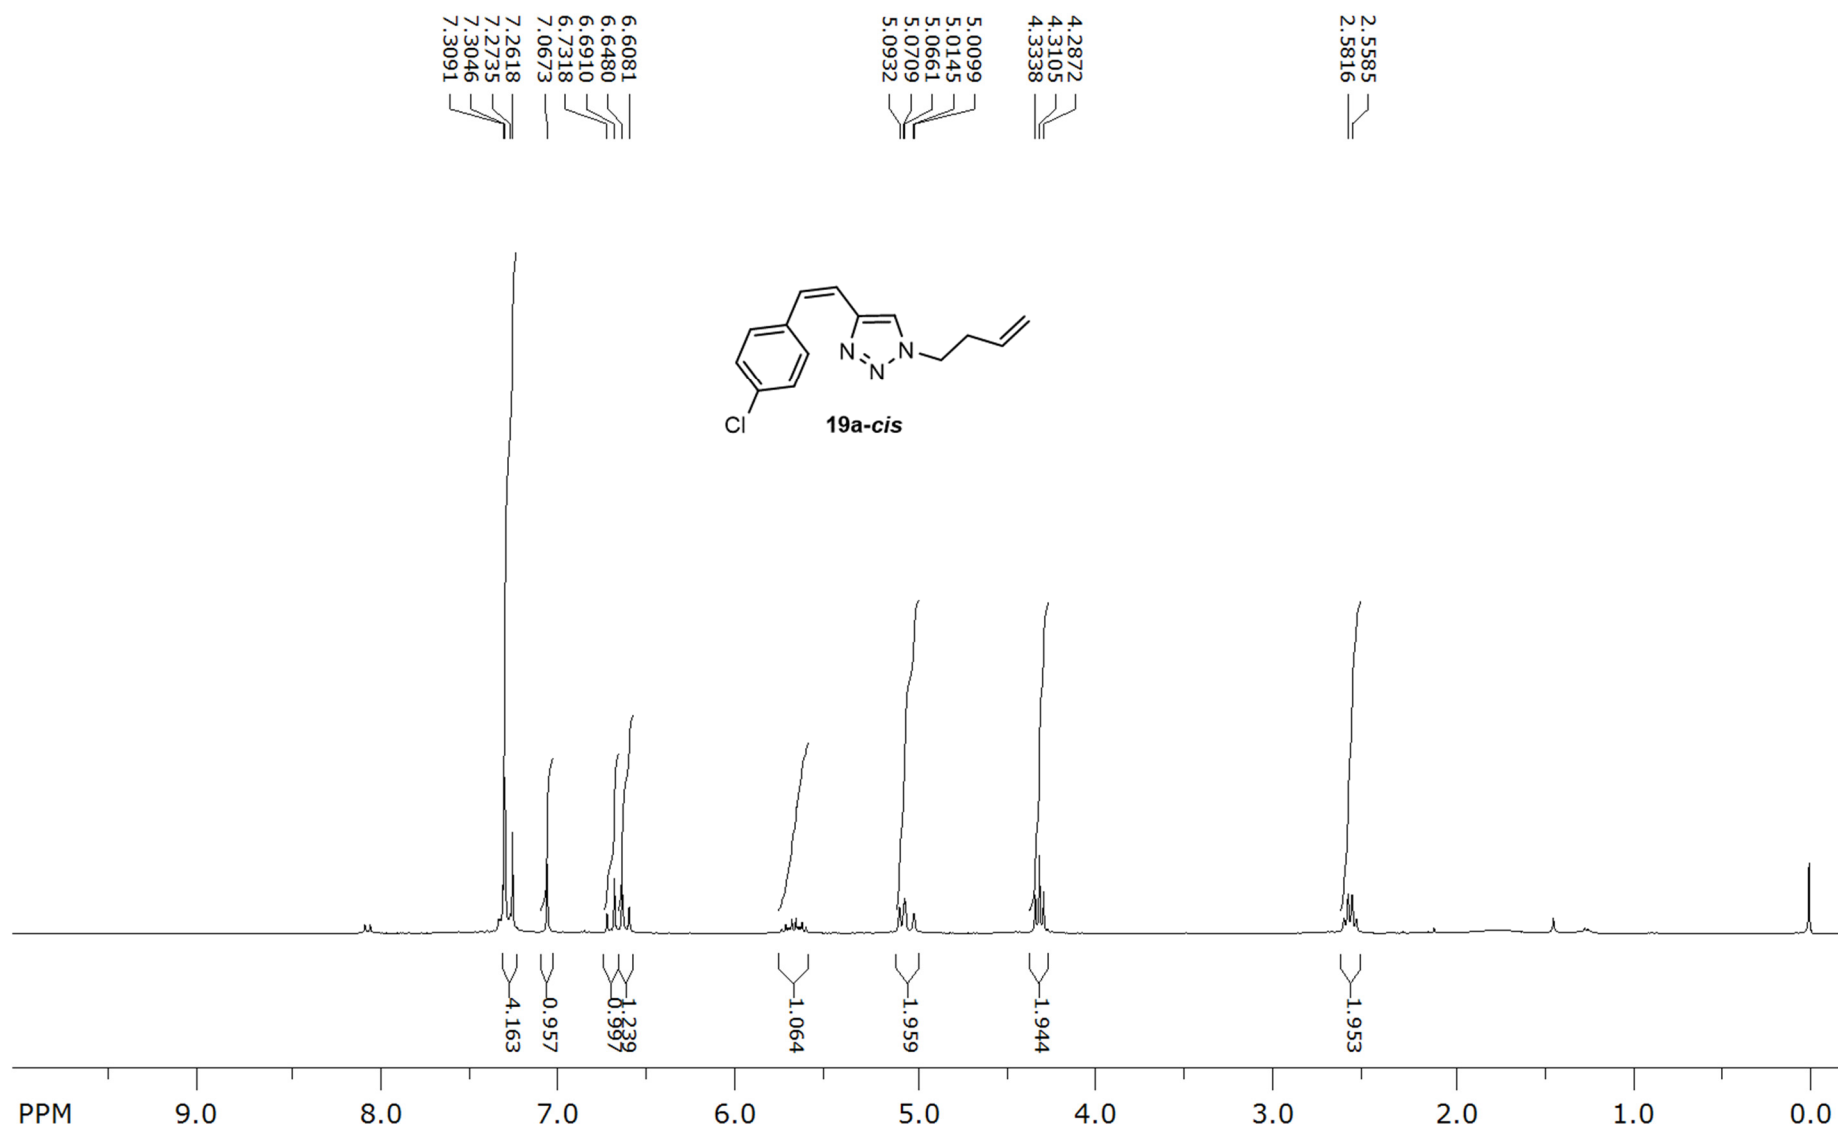

Figure S64.  $^1\text{H}$  NMR (CDCl<sub>3</sub>) spectrum of *cis*-**19**.

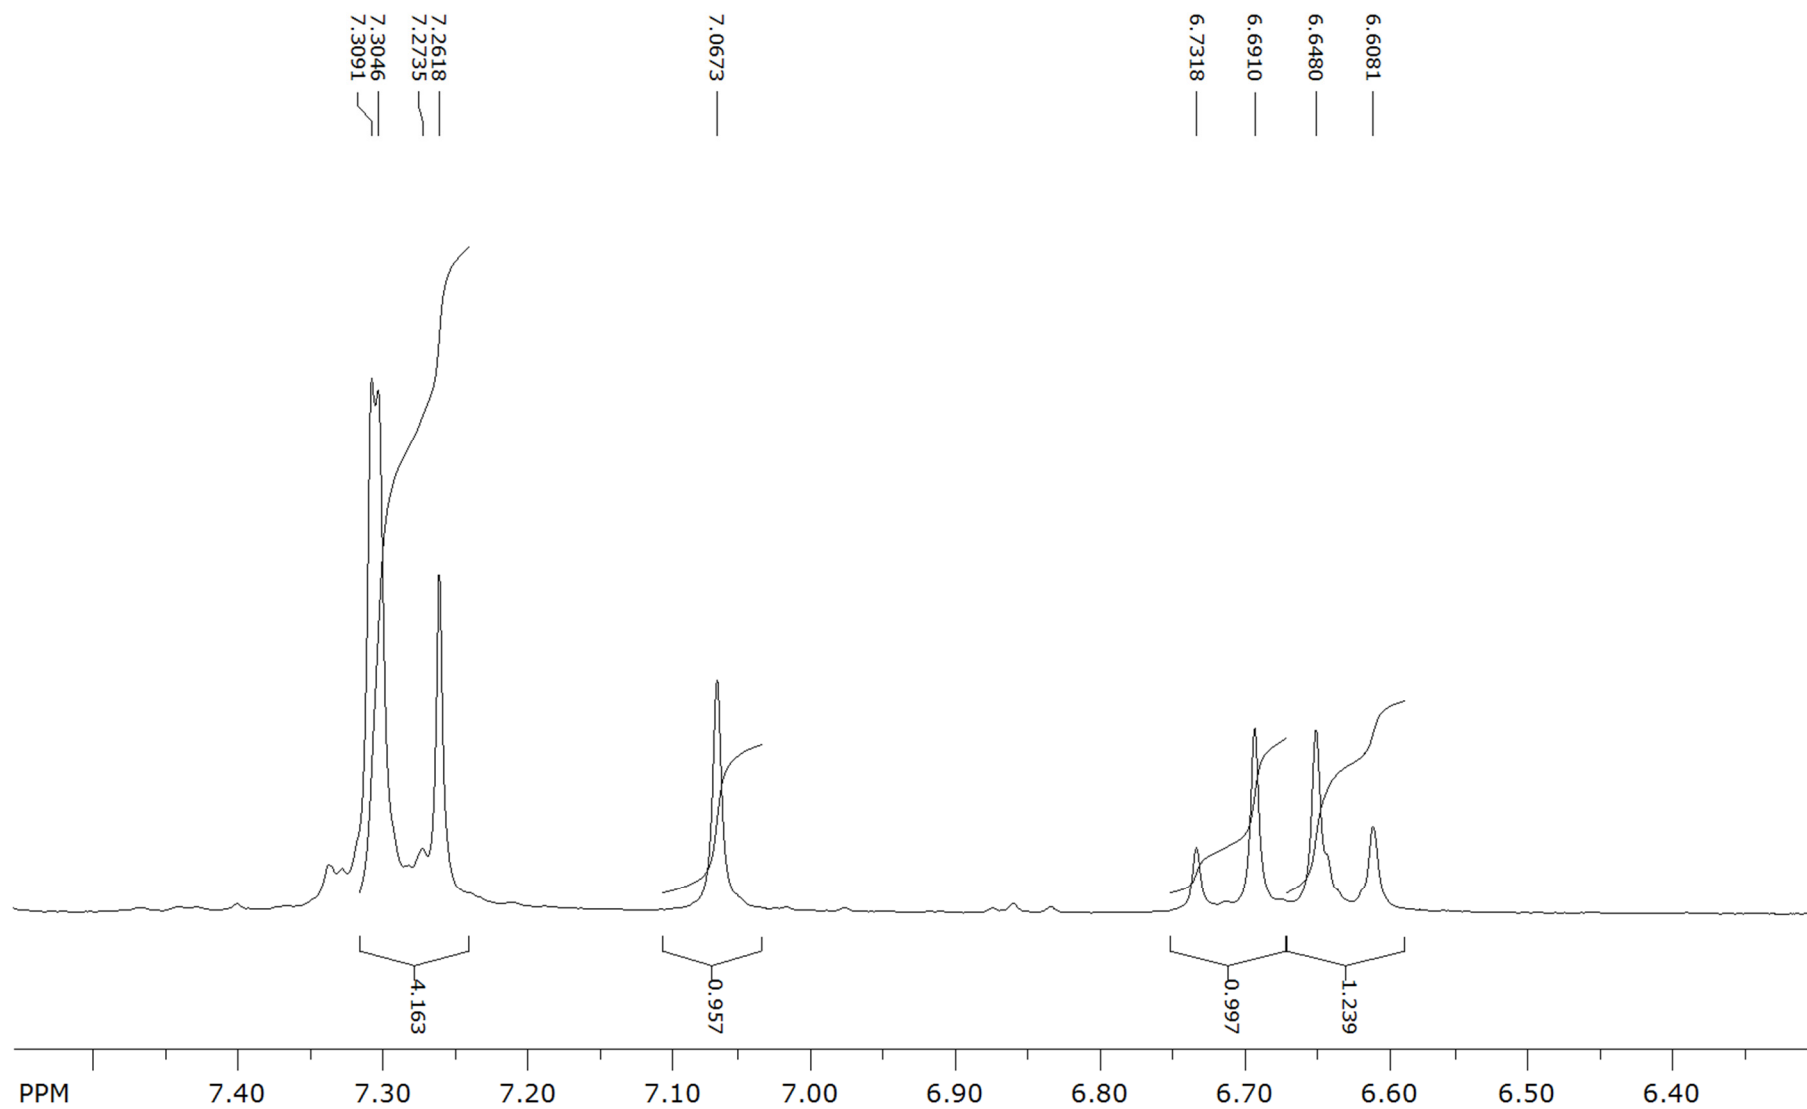

Figure S65. <sup>1</sup>H NMR (CDCl<sub>3</sub>) spectrum of aromatic part of *cis*-**19**.

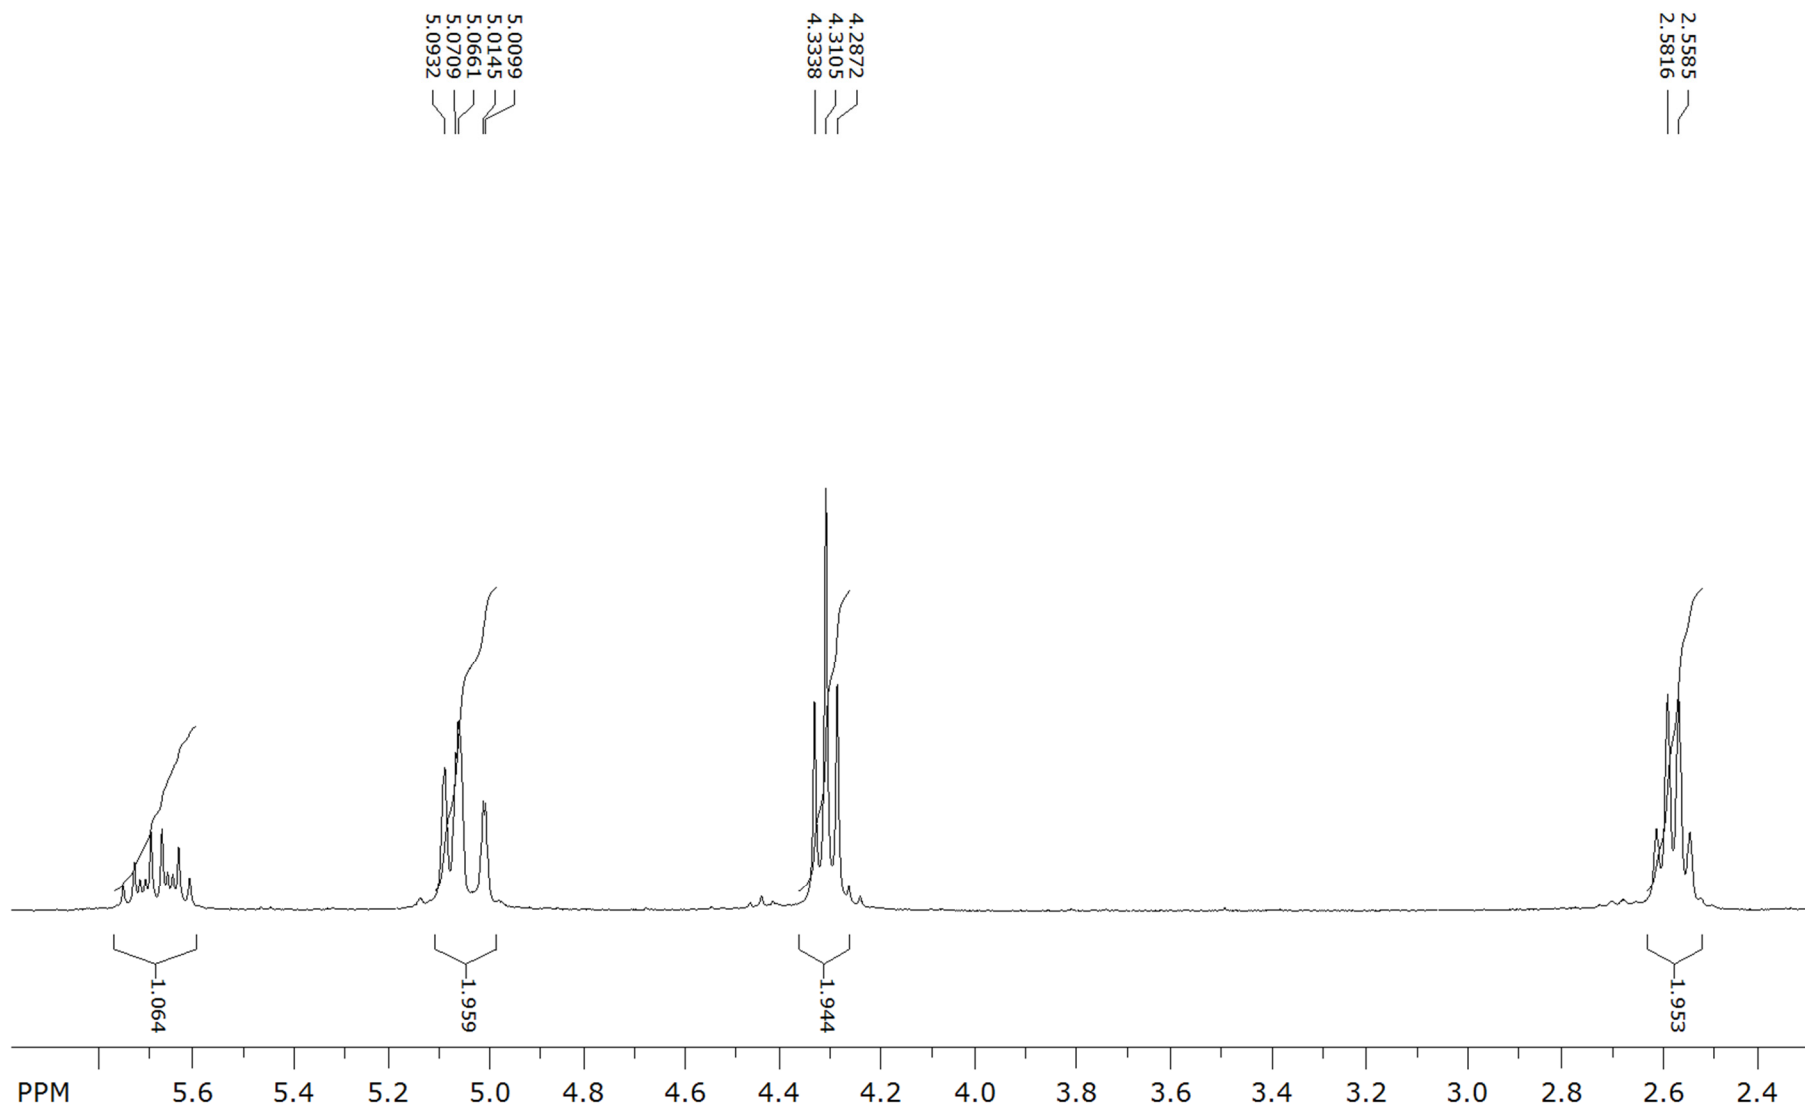

Figure S66.  $^1\text{H}$  NMR ( $\text{CDCl}_3$ ) spectrum of aliphatic part of *cis*-19.

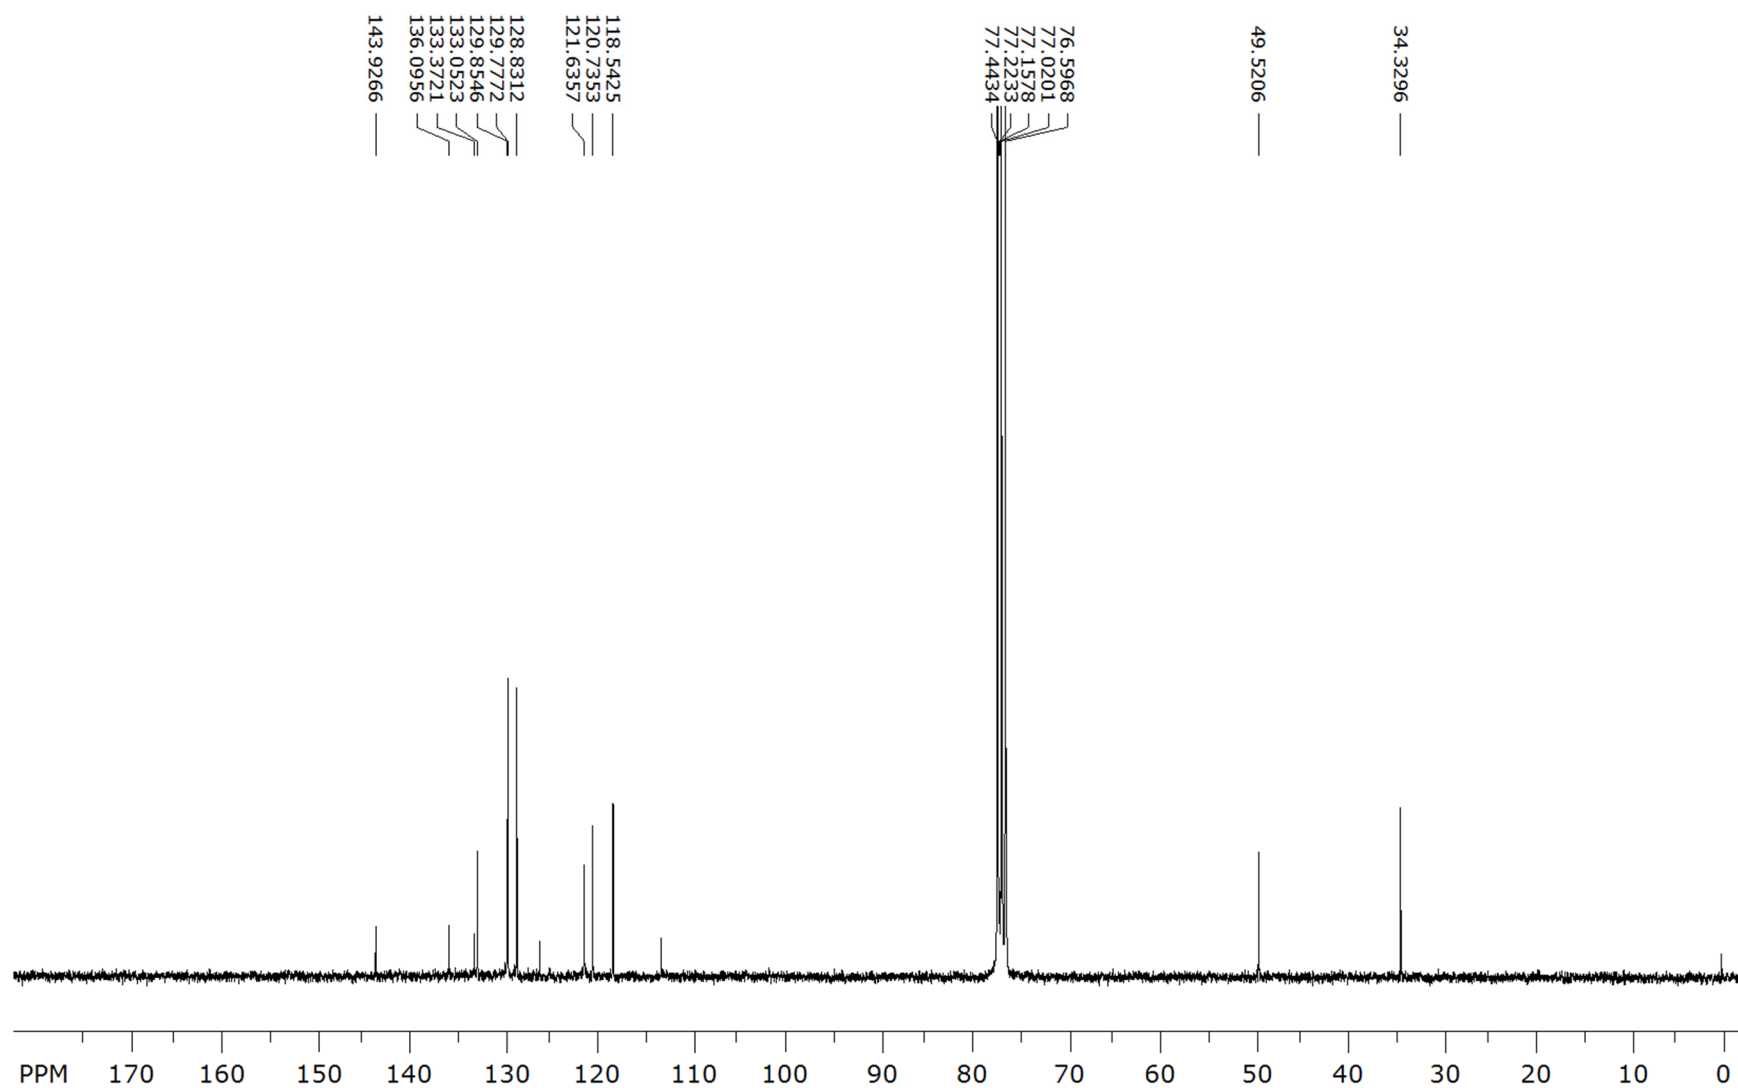

Figure S67. <sup>13</sup>C NMR (CDCl<sub>3</sub>) spectrum of *cis*-**19**.



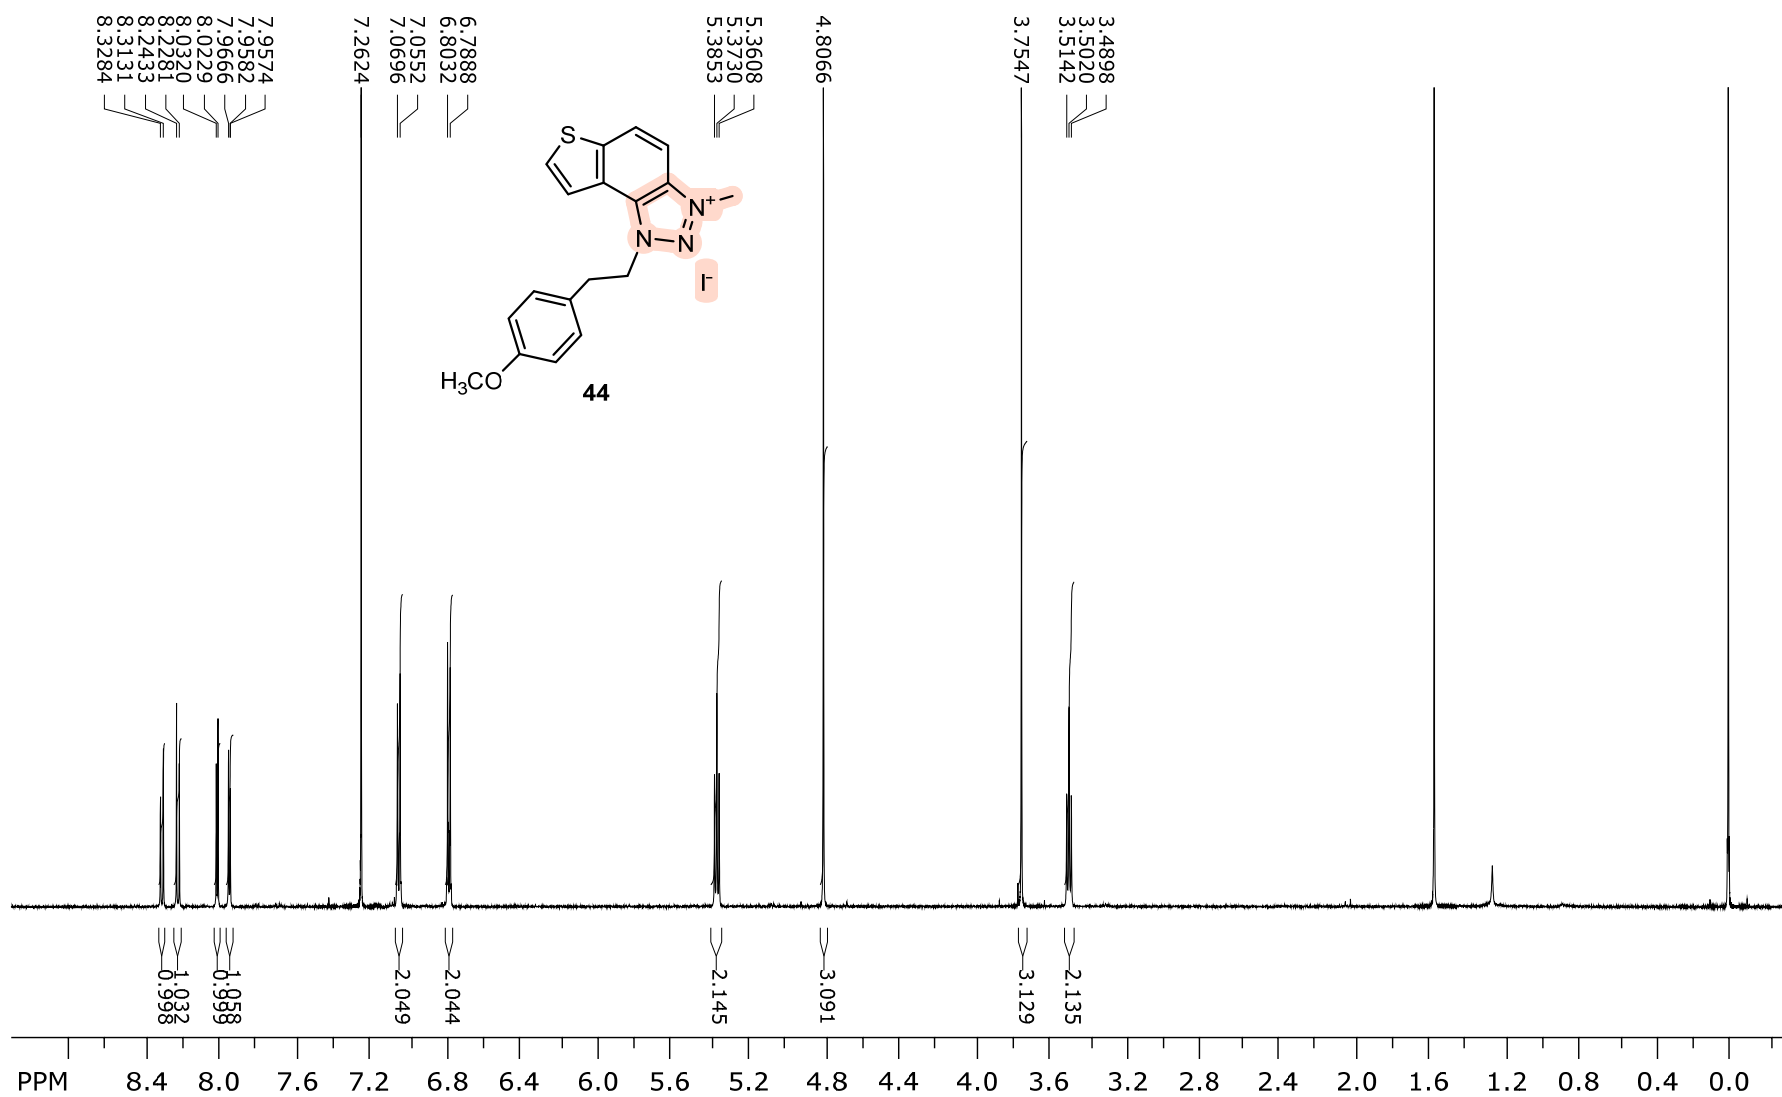

Figure S68. <sup>1</sup>H NMR (CDCl<sub>3</sub>) spectrum of **44**.

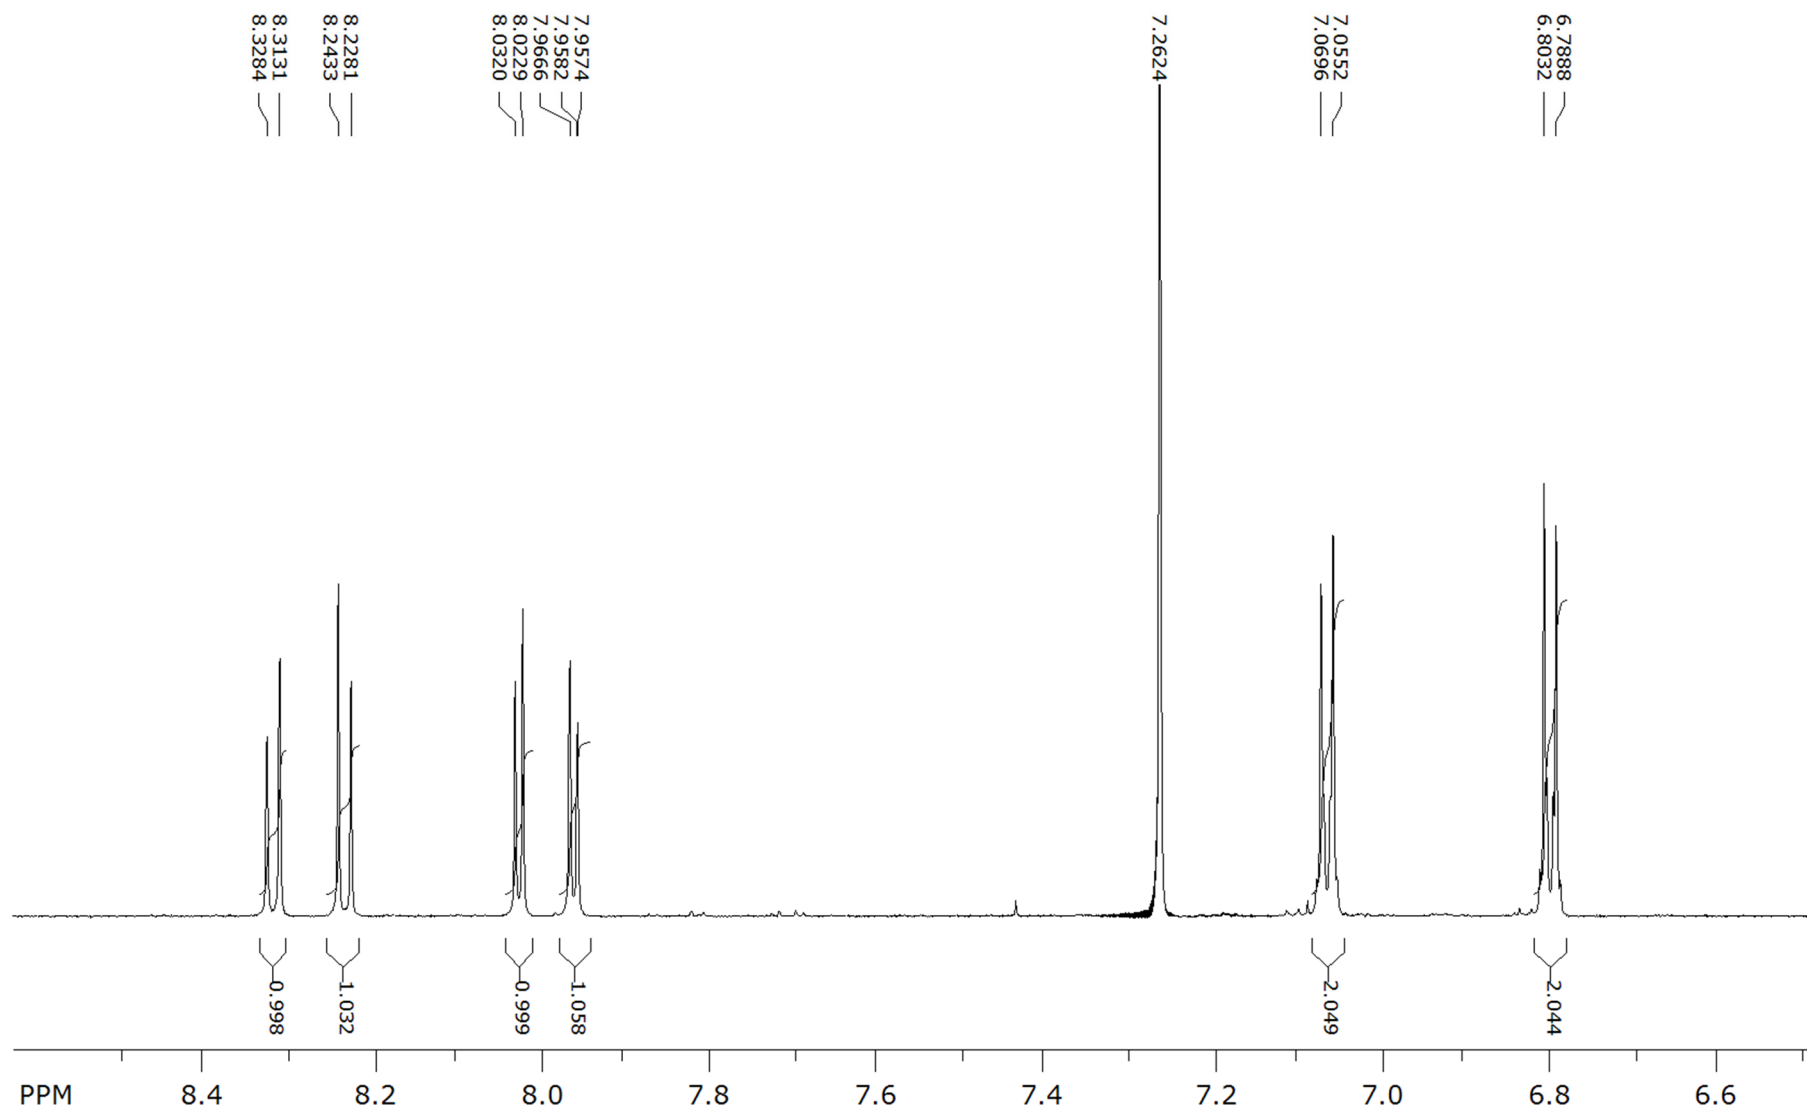

Figure S69. <sup>1</sup>H NMR (CDCl<sub>3</sub>) spectrum of aromatic part of **44**.

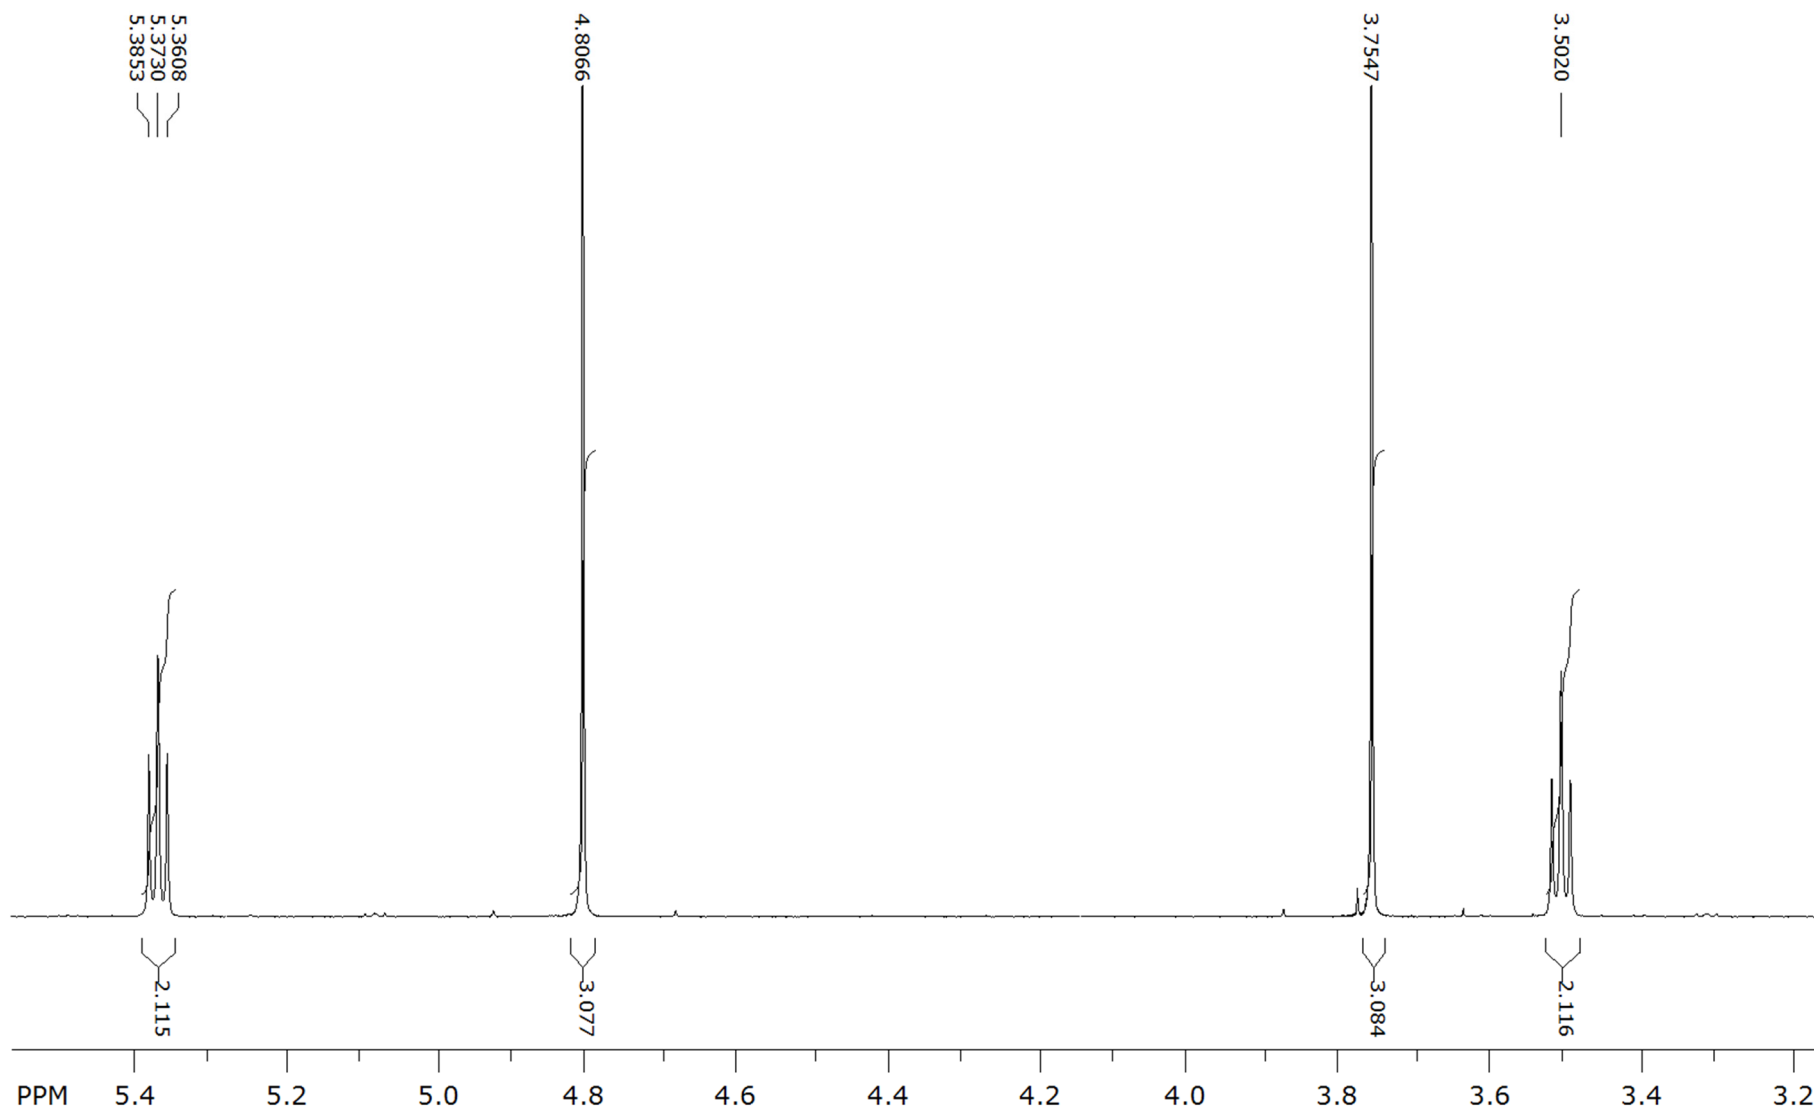

Figure S70. <sup>1</sup>H NMR (CDCl<sub>3</sub>) spectrum of aliphatic part of **44**.

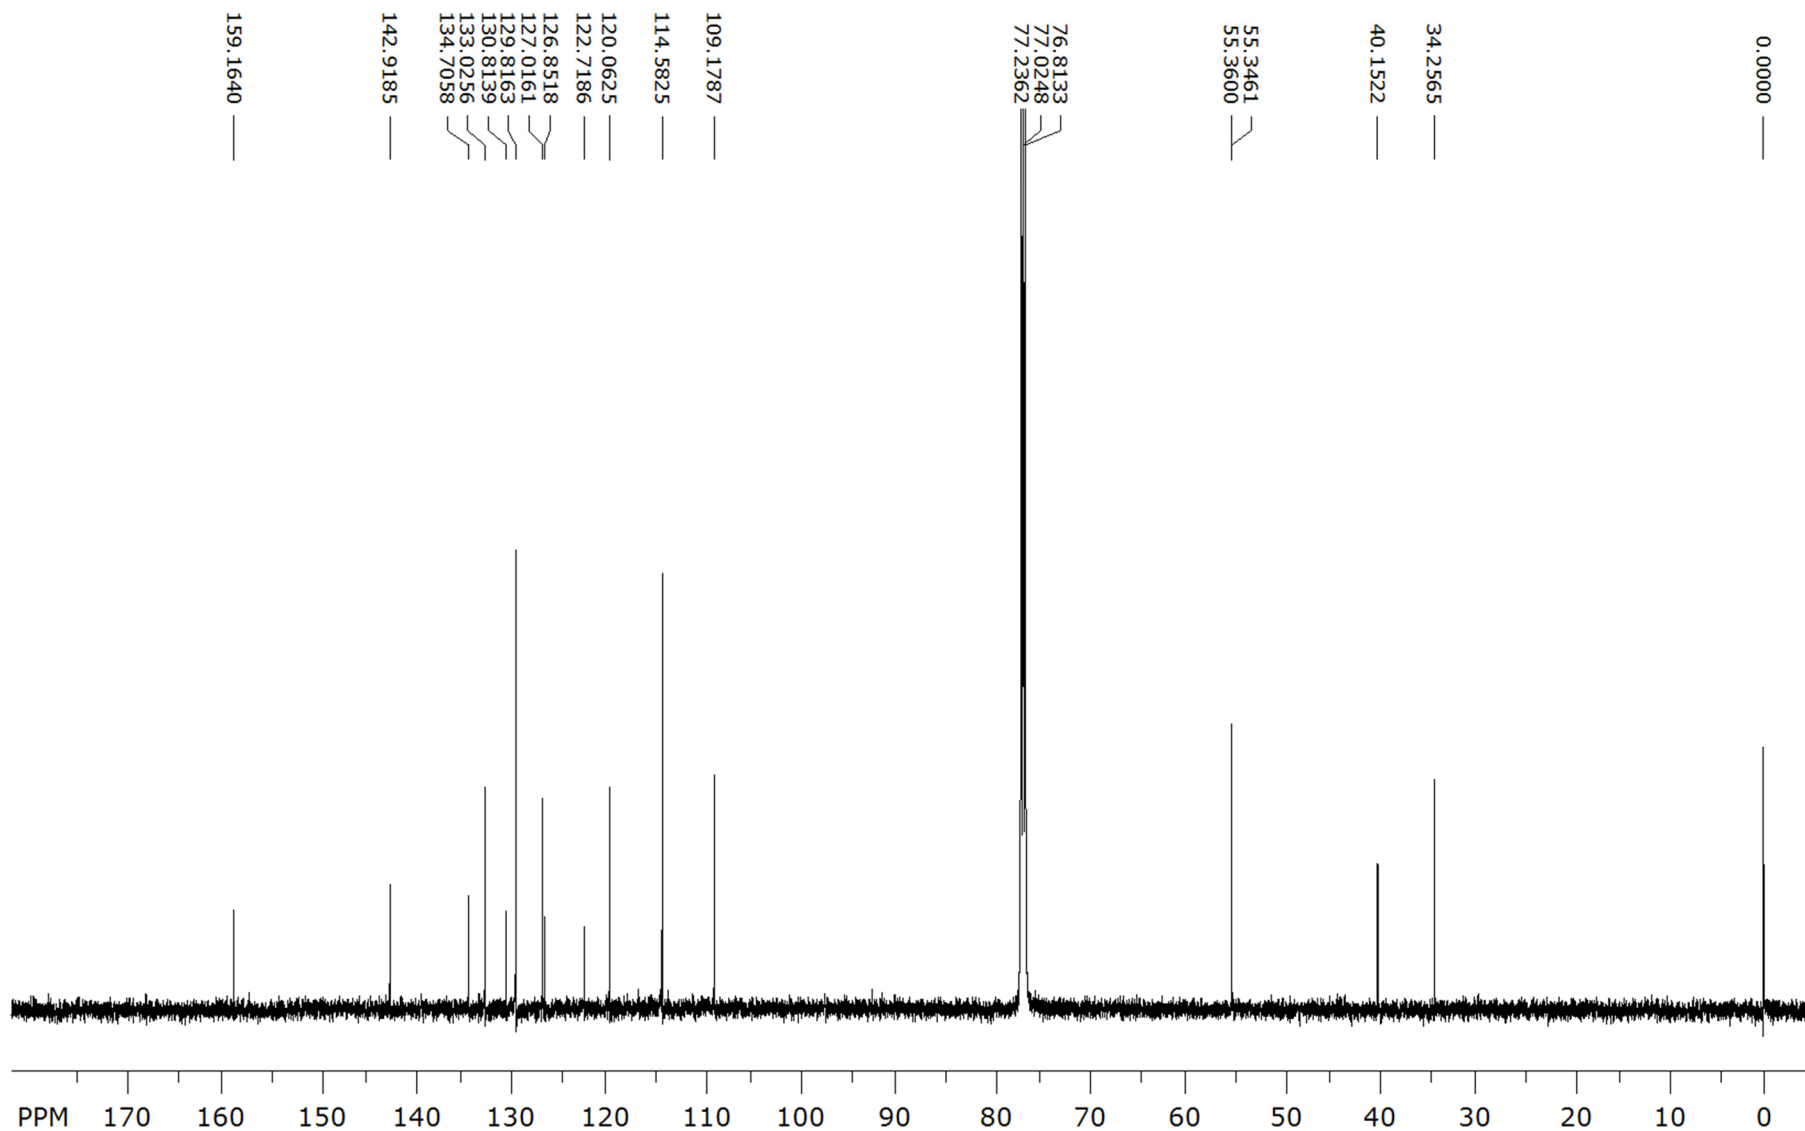

Figure S71. <sup>13</sup>C NMR (CDCl<sub>3</sub>) spectrum of **44**.

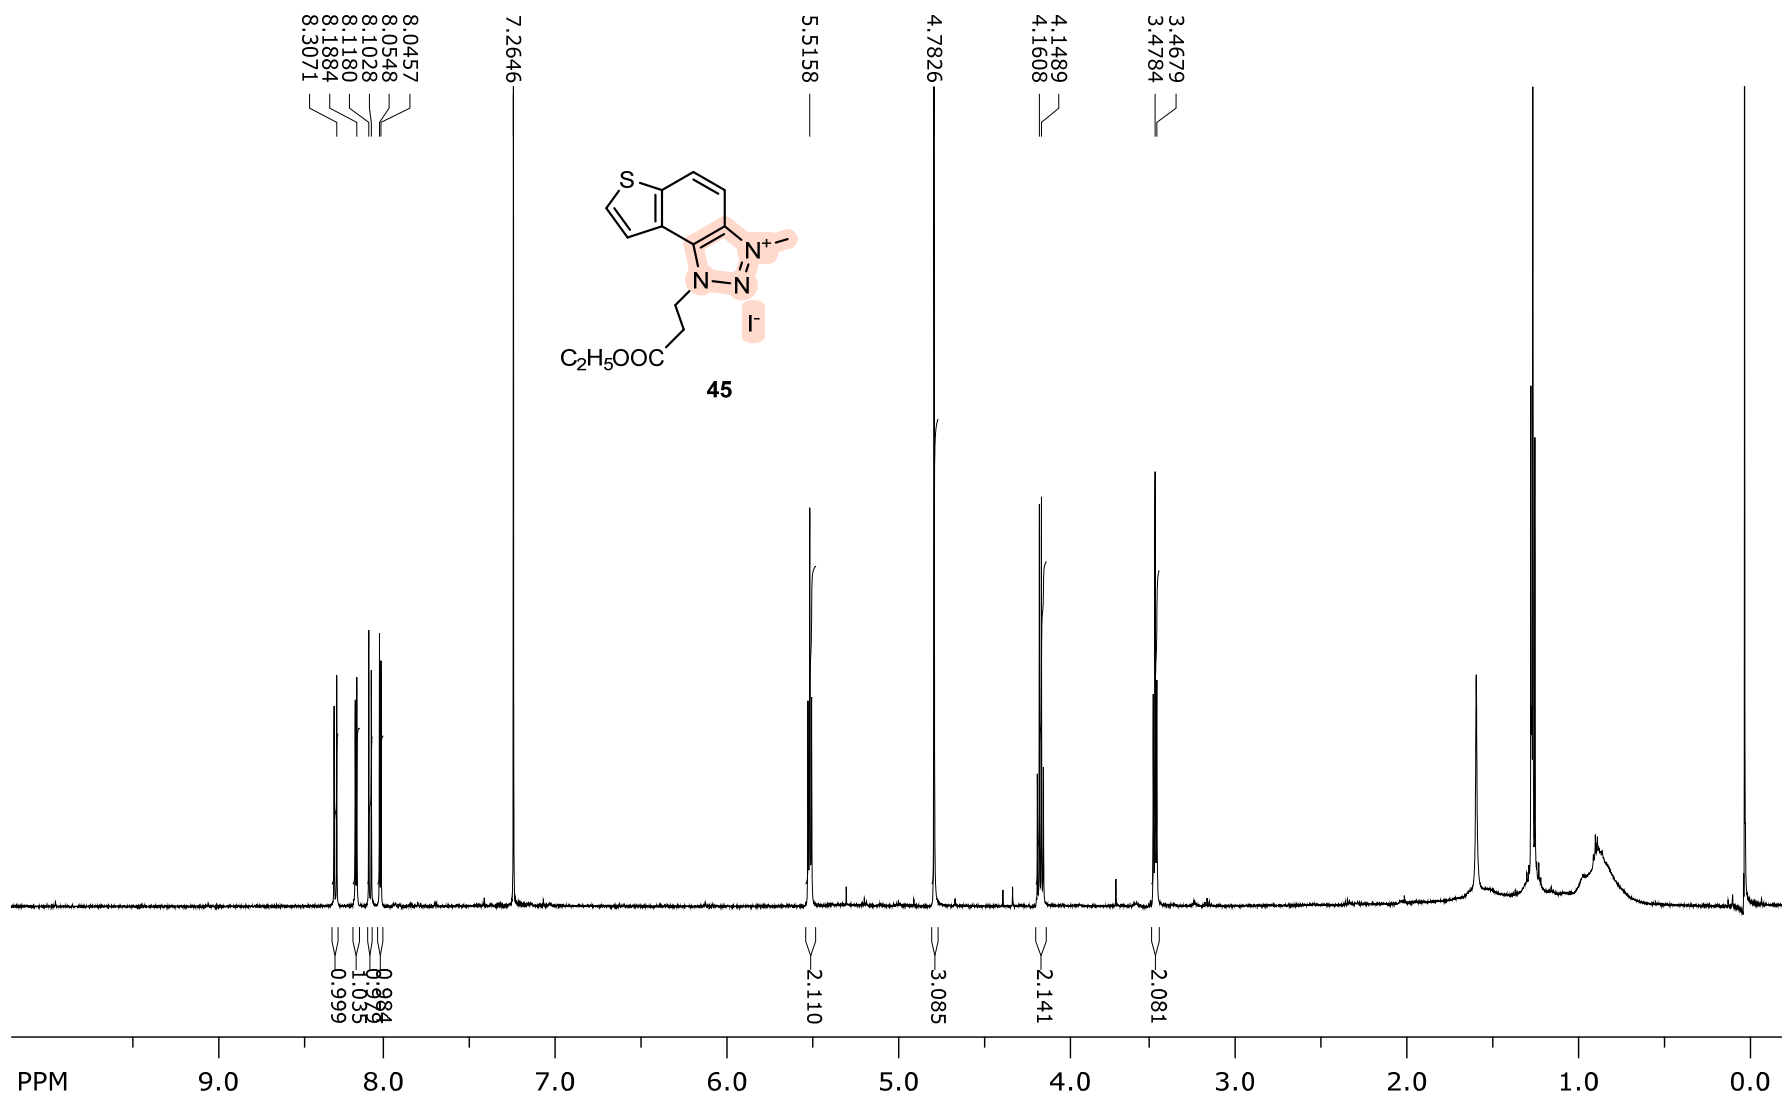

Figure S72. <sup>1</sup>H NMR (CDCl<sub>3</sub>) spectrum of **45**.

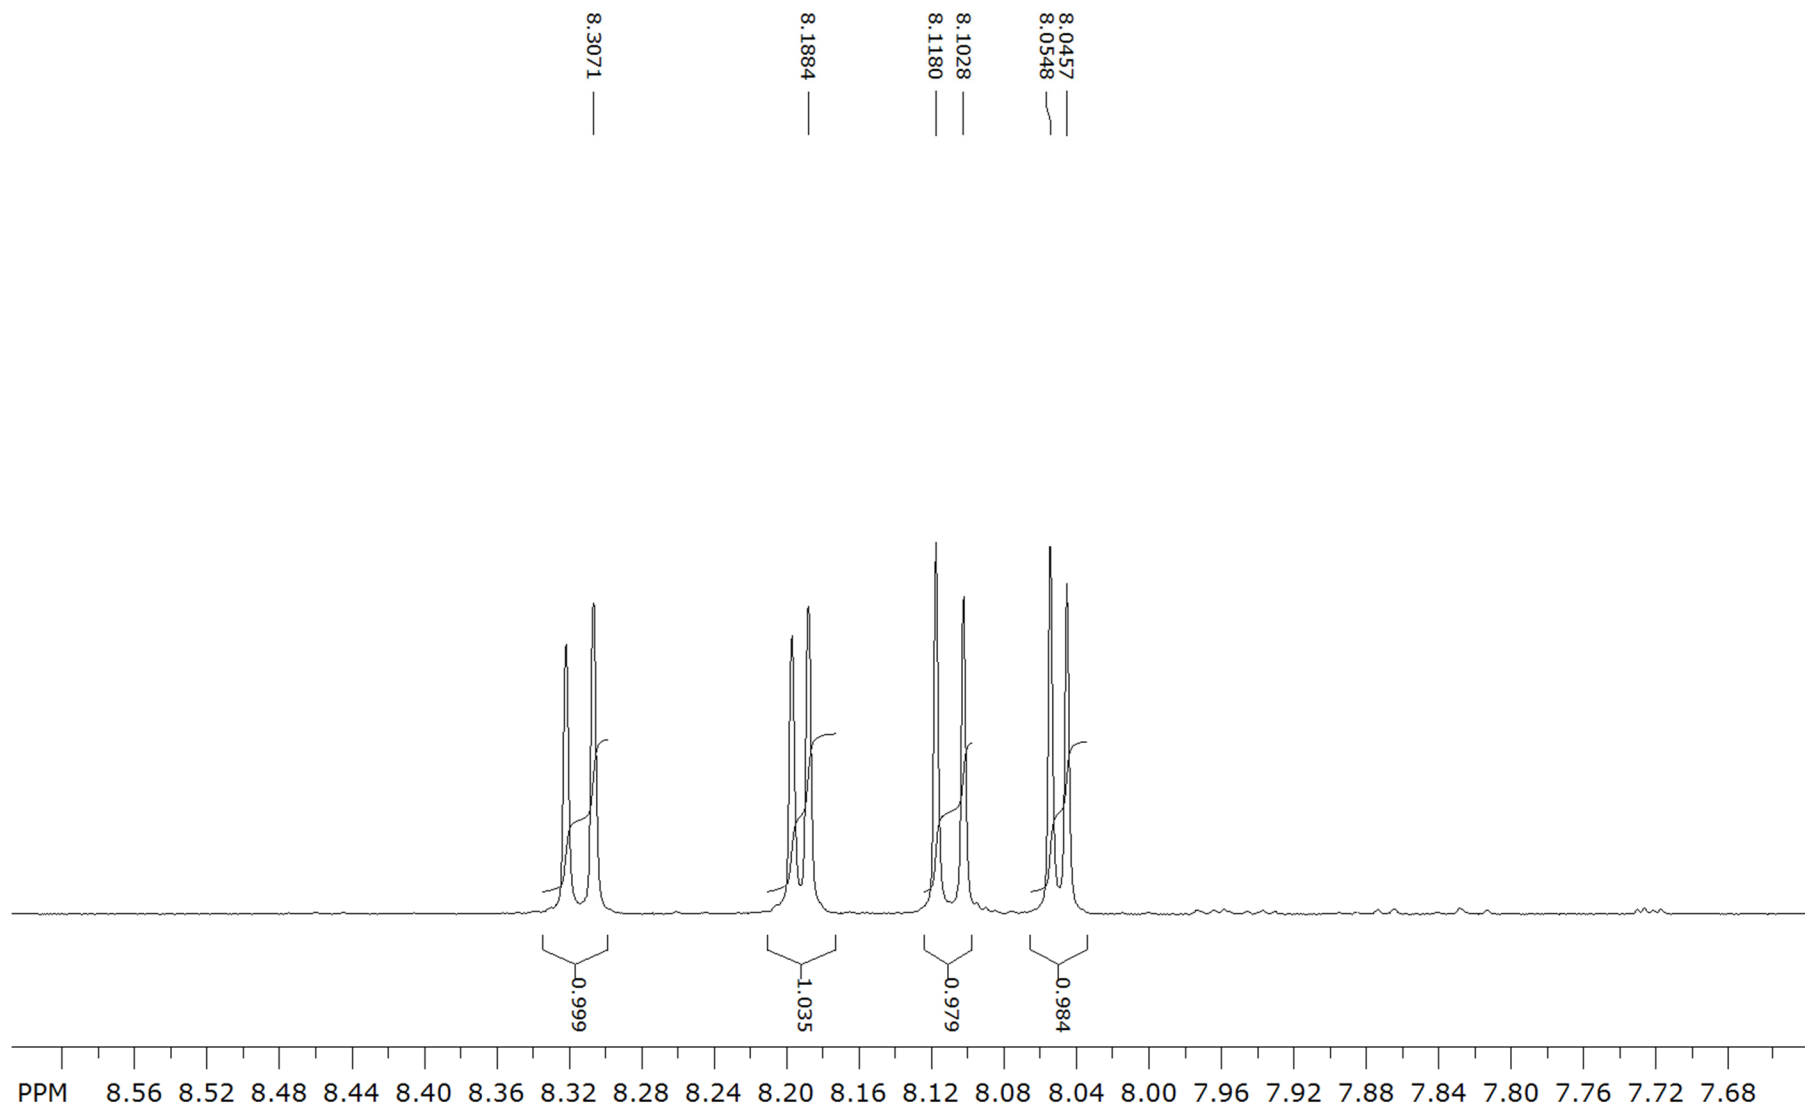

Figure S73.  $^1\text{H}$  NMR ( $\text{CDCl}_3$ ) spectrum of aromatic part of **45**.

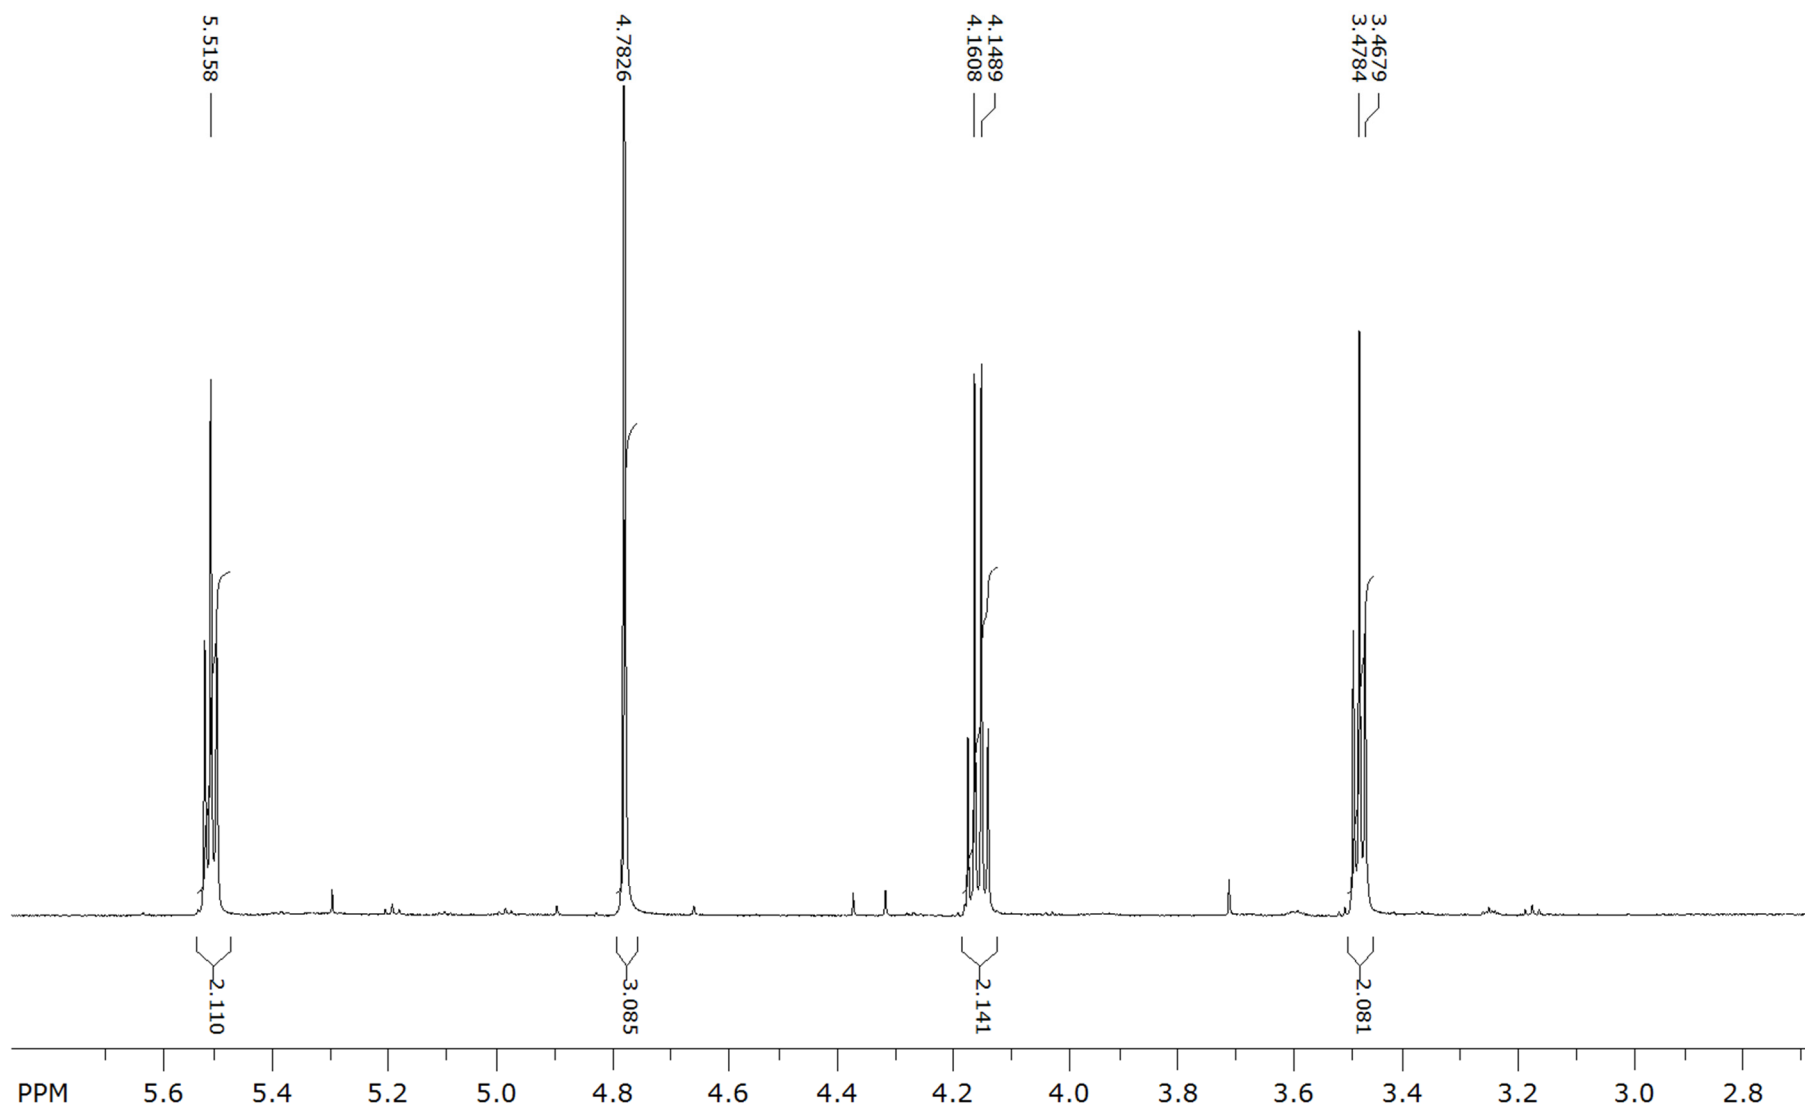

Figure S74.  $^1\text{H}$  NMR ( $\text{CDCl}_3$ ) spectrum of aliphatic part of **45**.

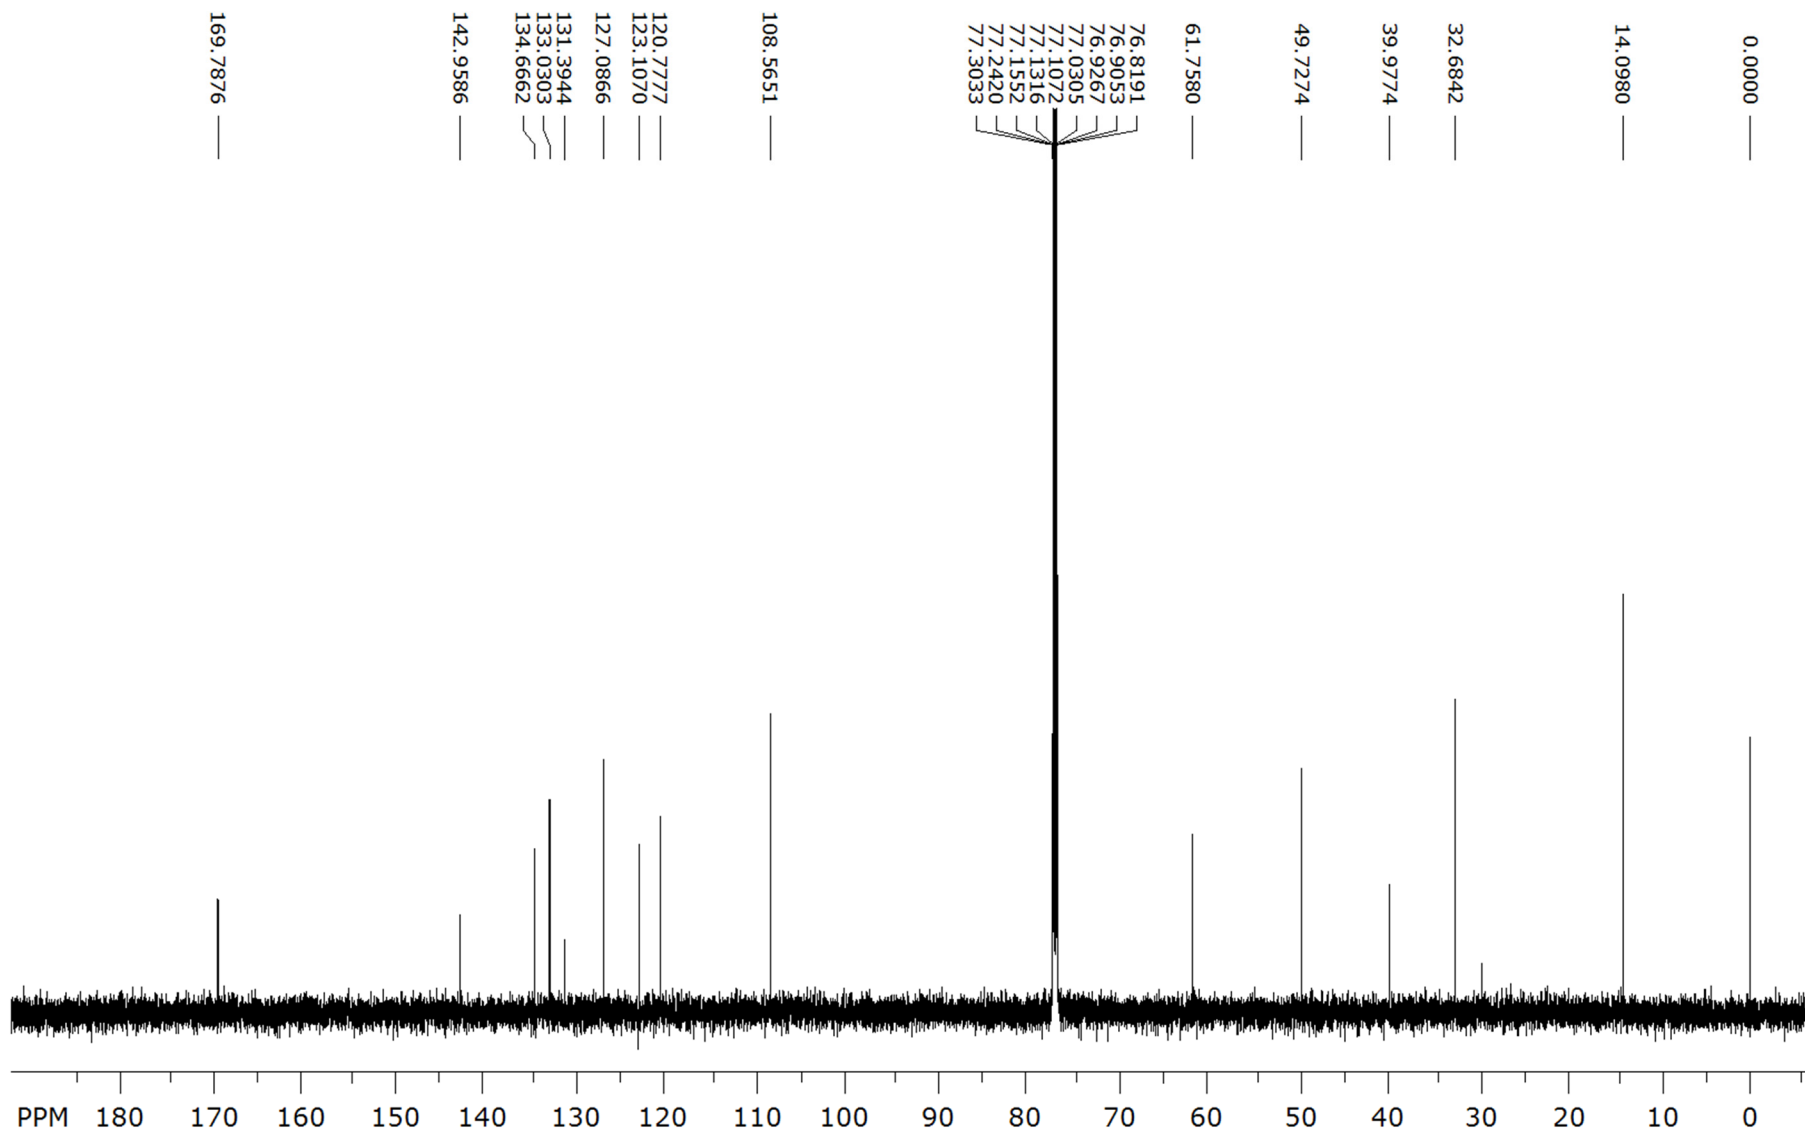

Figure S75. <sup>13</sup>C NMR (CDCl<sub>3</sub>) spectrum of **45**.



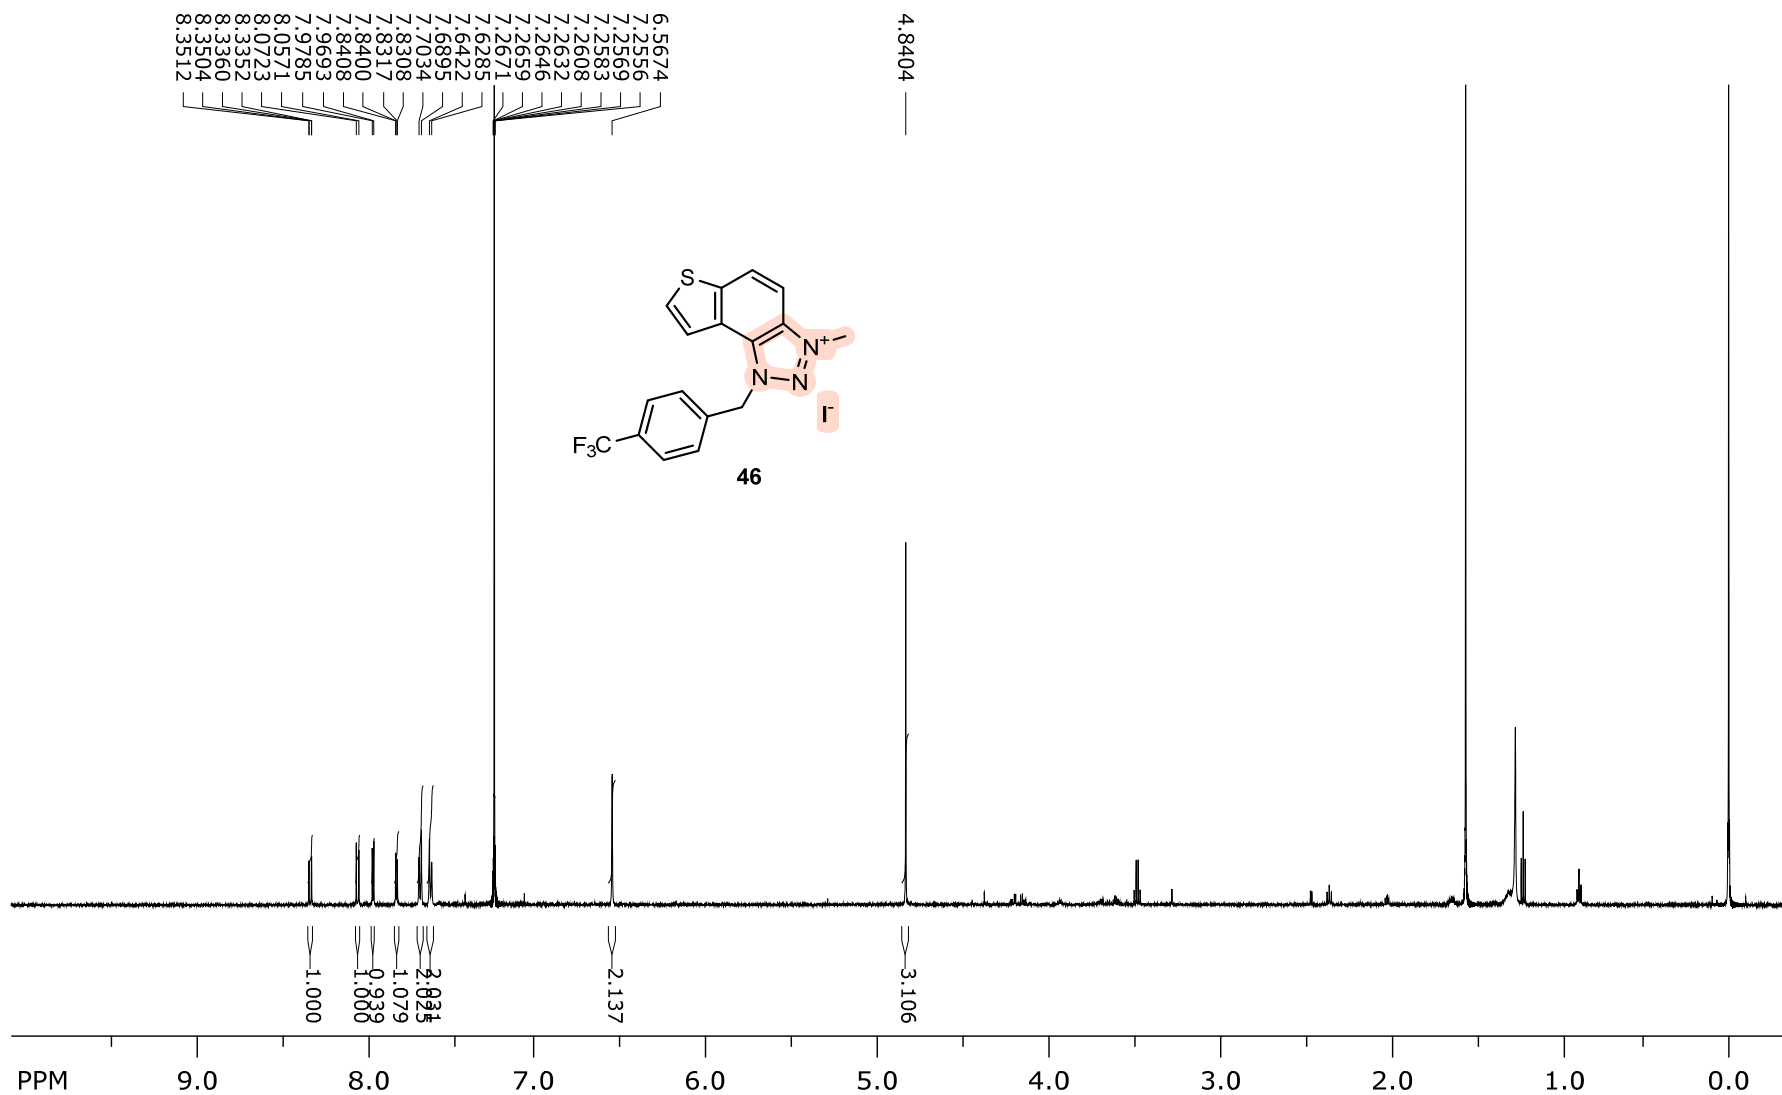

Figure S76. <sup>1</sup>H NMR (CDCl<sub>3</sub>) spectrum of **46**.

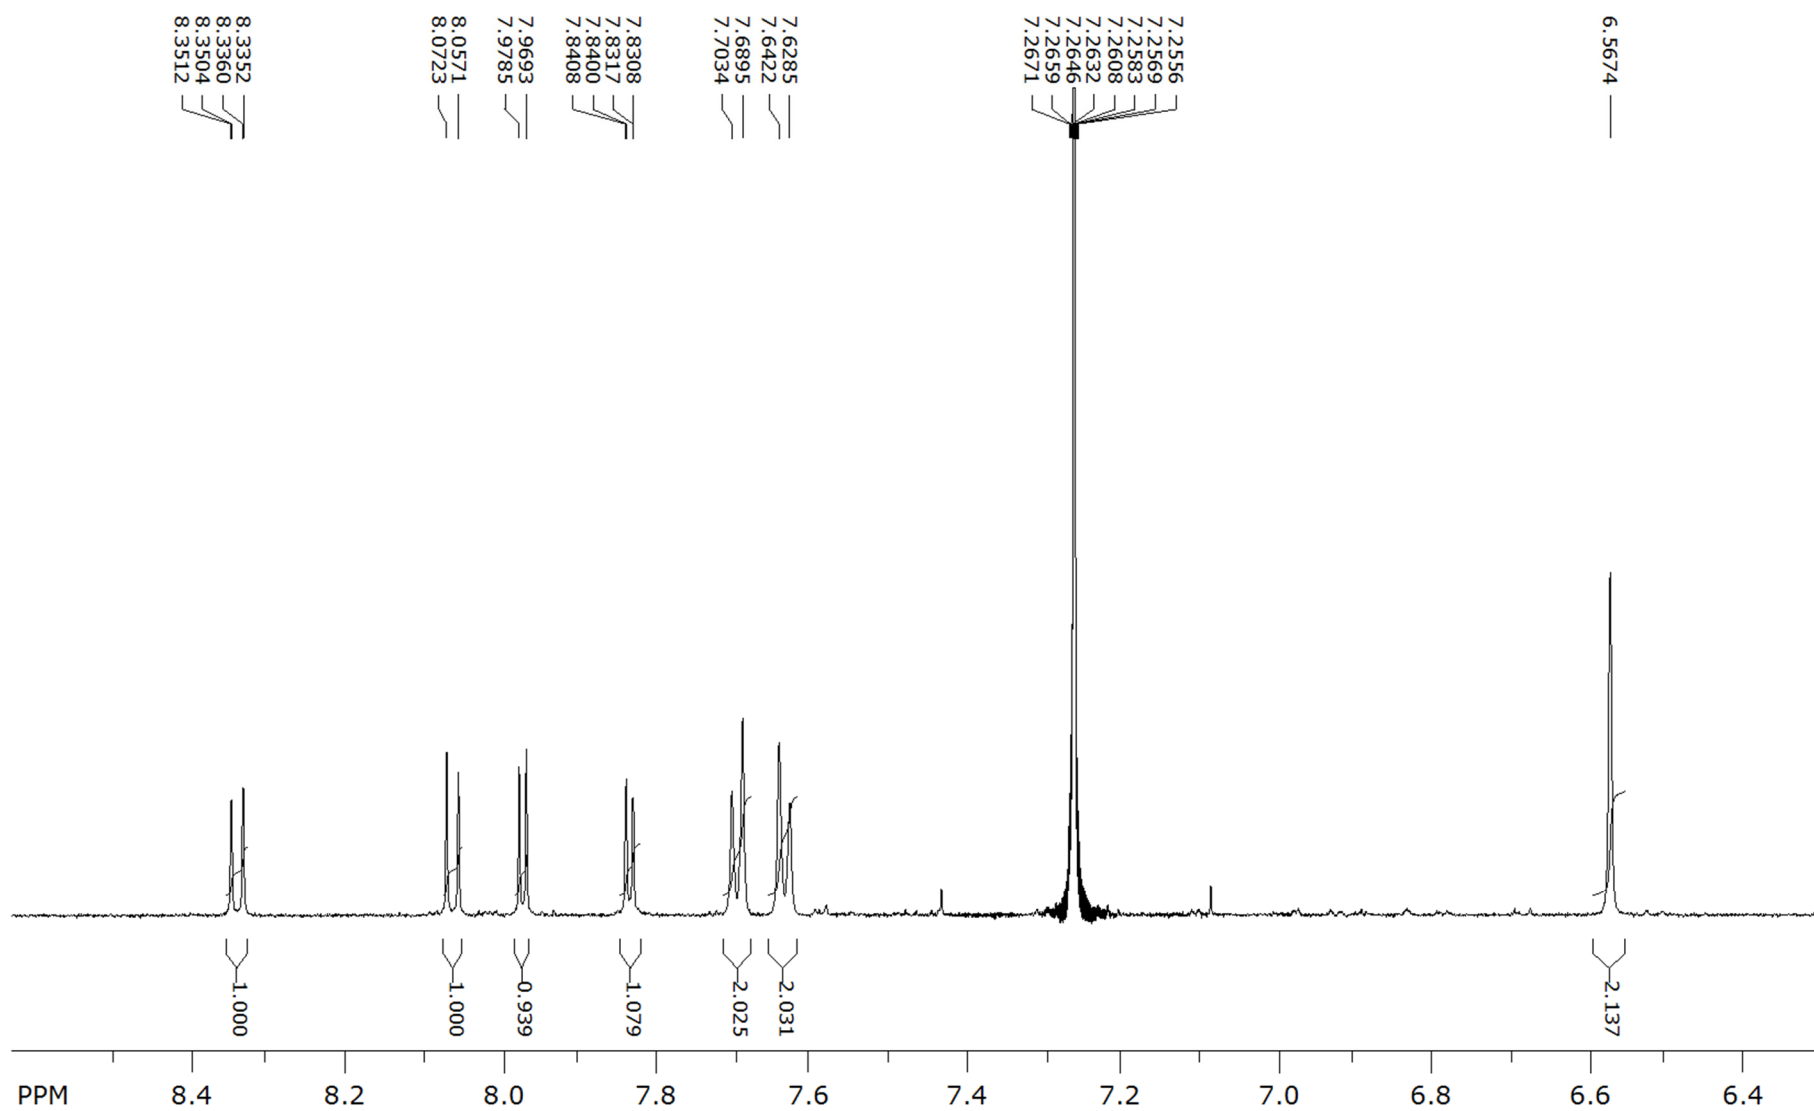

Figure S77. <sup>1</sup>H NMR (CDCl<sub>3</sub>) spectrum of aromatic part of **46**.

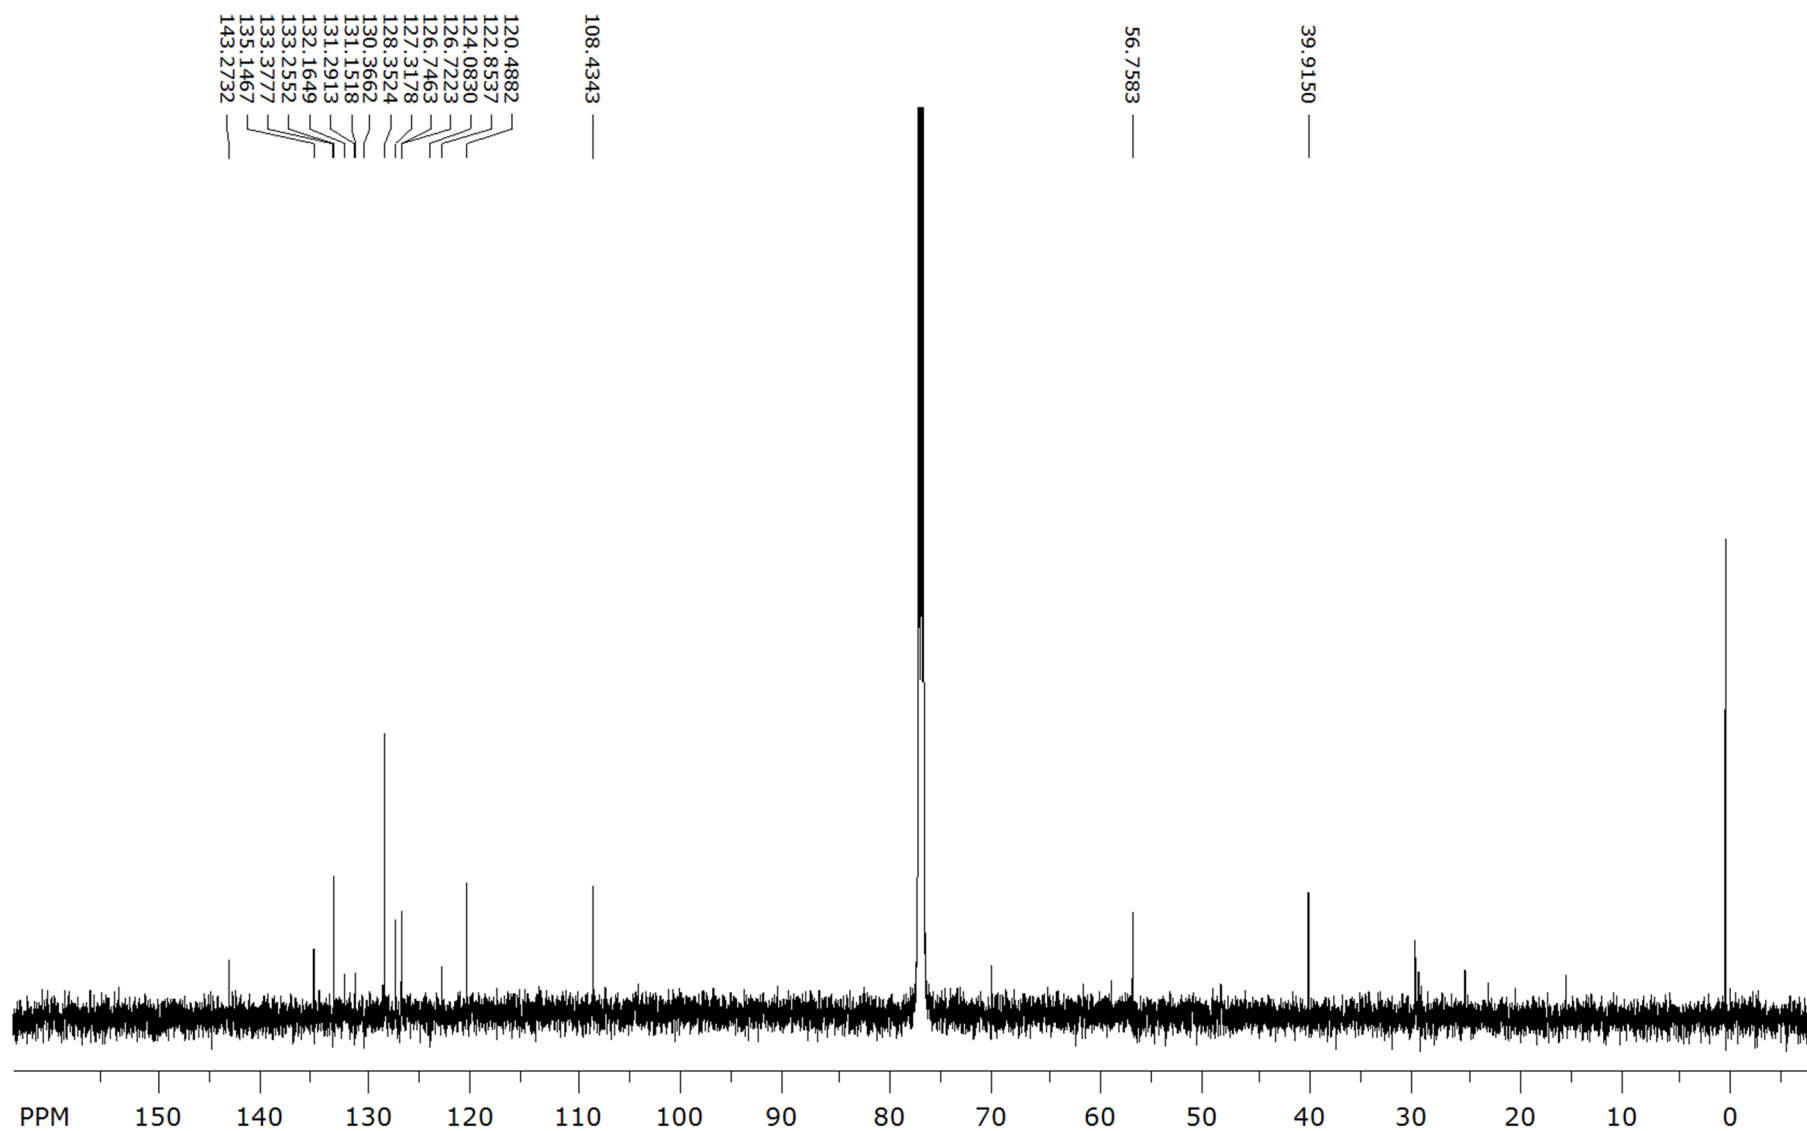

Figure S78.  $^{13}\text{C}$  NMR ( $\text{CDCl}_3$ ) spectrum of **46**.

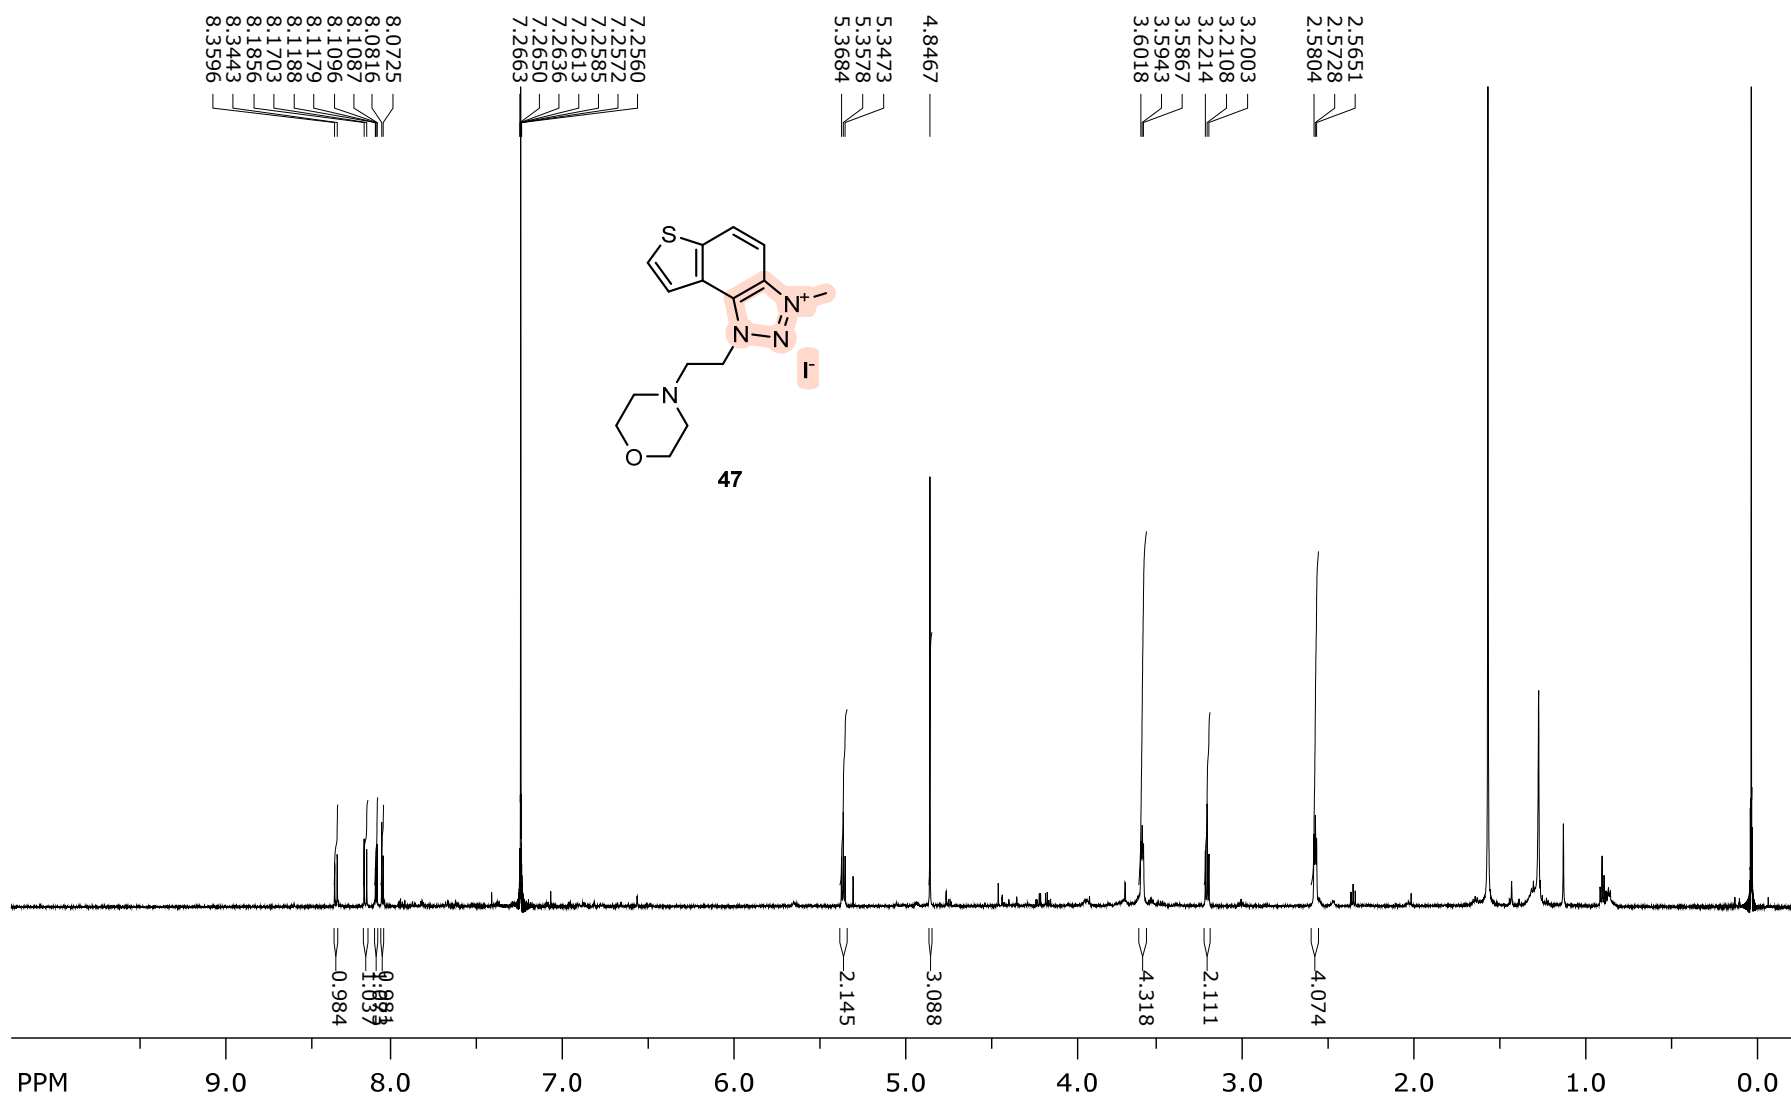

Figure S79. <sup>1</sup>H NMR (CDCl<sub>3</sub>) spectrum of **47**.

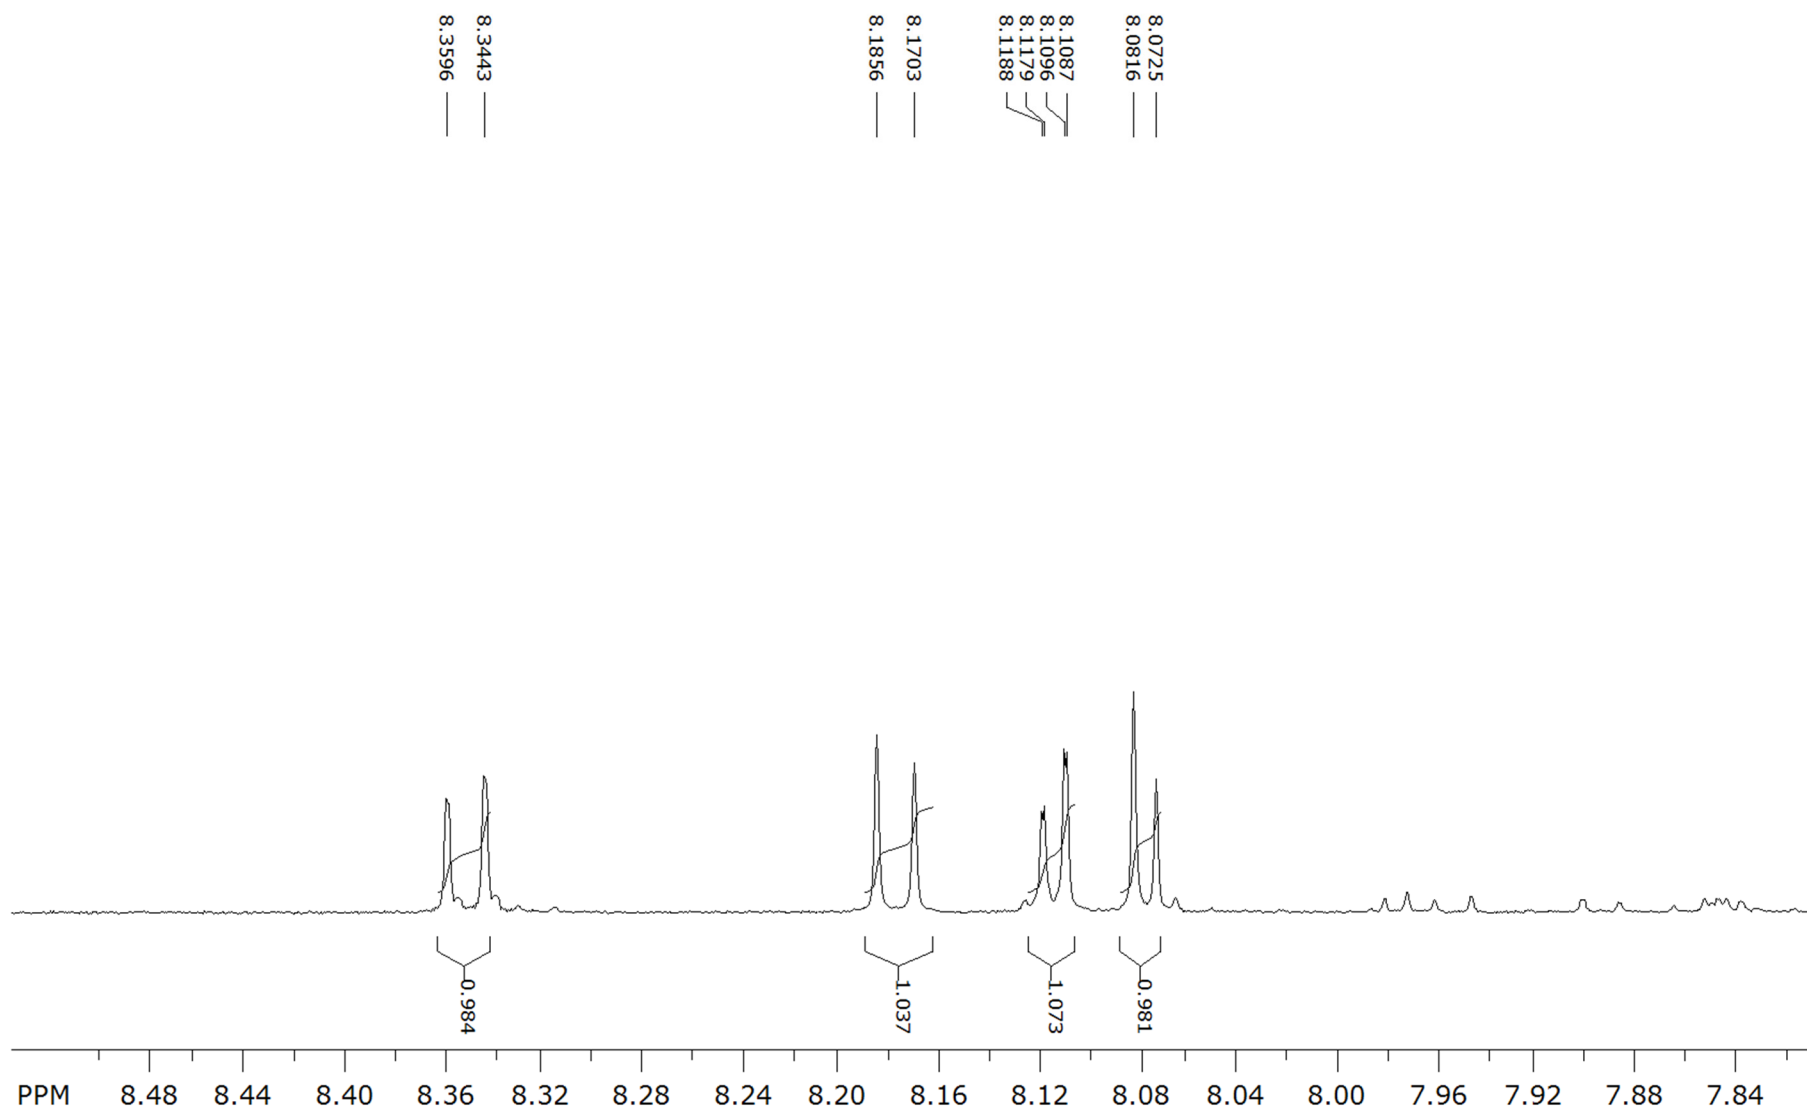

Figure S80.  $^1\text{H}$  NMR ( $\text{CDCl}_3$ ) spectrum of aromatic part of **47**.

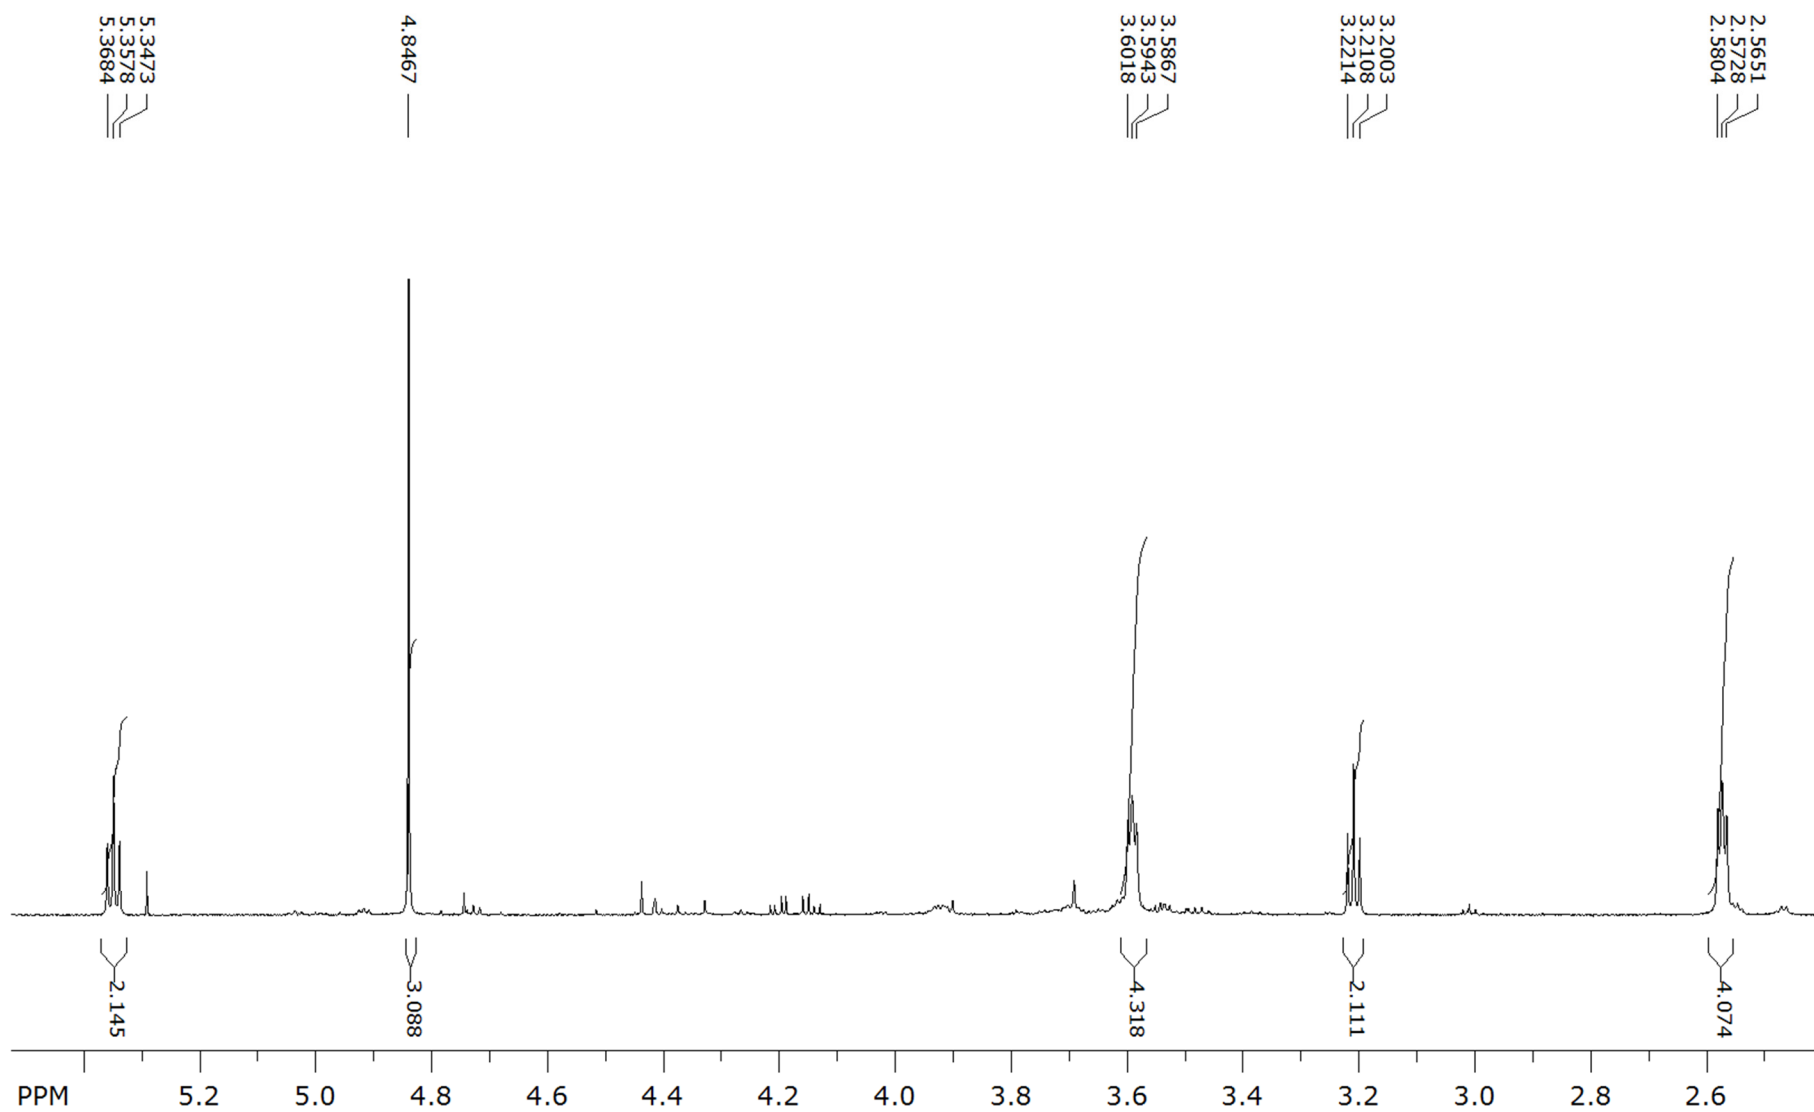

Figure S81.  $^1\text{H}$  NMR ( $\text{CDCl}_3$ ) spectrum of aliphatic part of **47**.

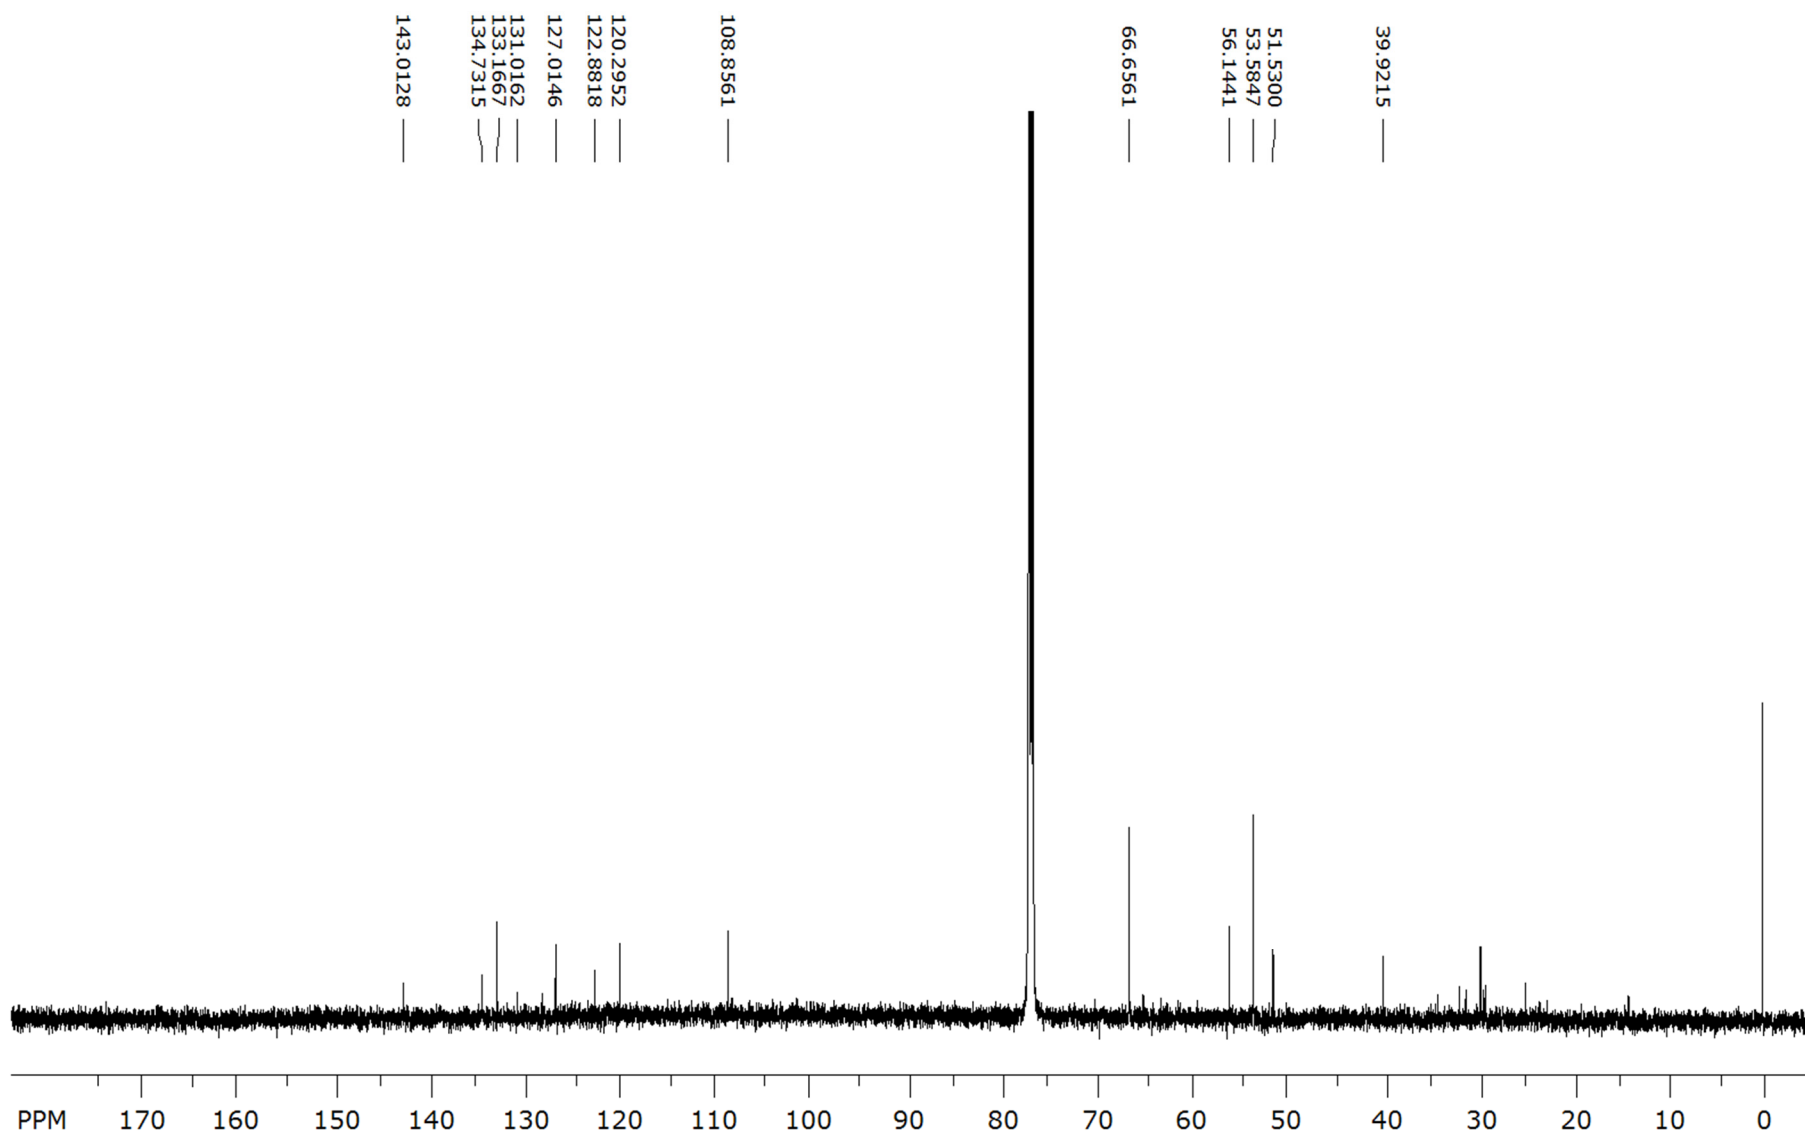

Figure S82. <sup>13</sup>C NMR (CDCl<sub>3</sub>) spectrum of **47**.

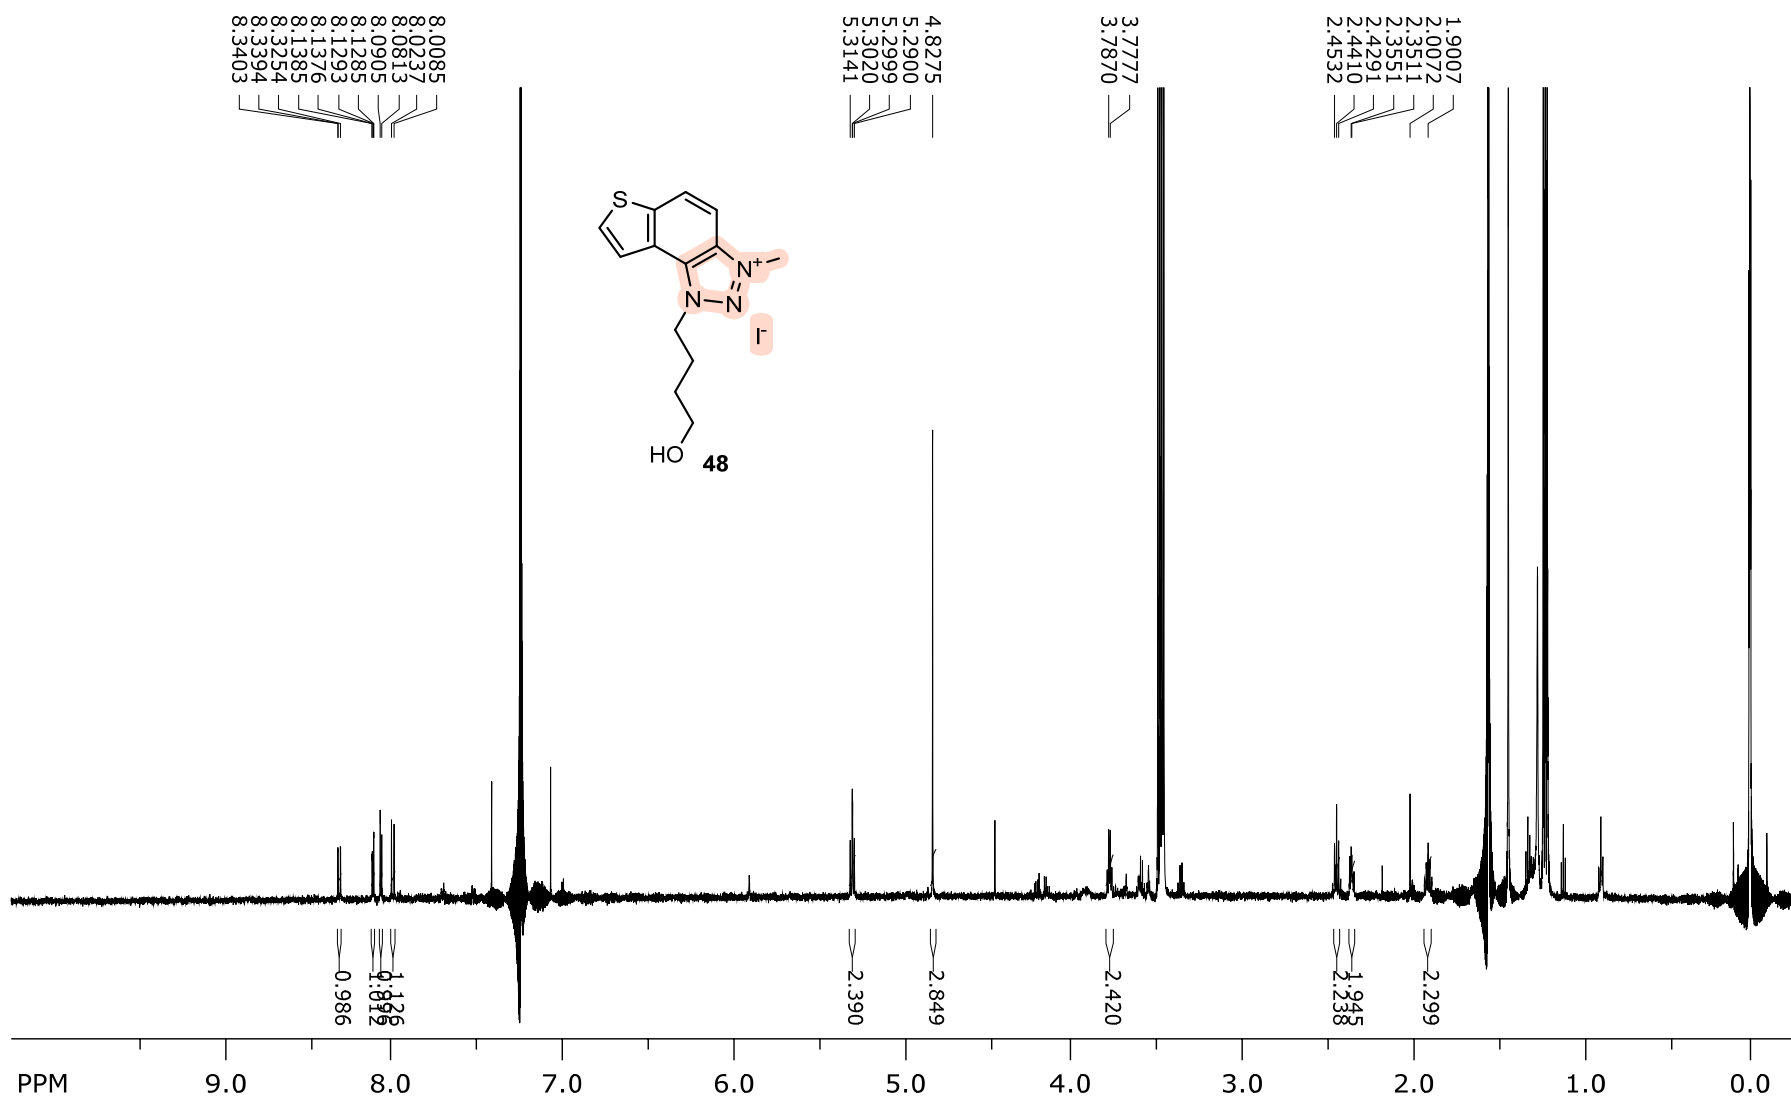

Figure S83.  $^1\text{H}$  NMR (CDCl<sub>3</sub>) spectrum of **48**.



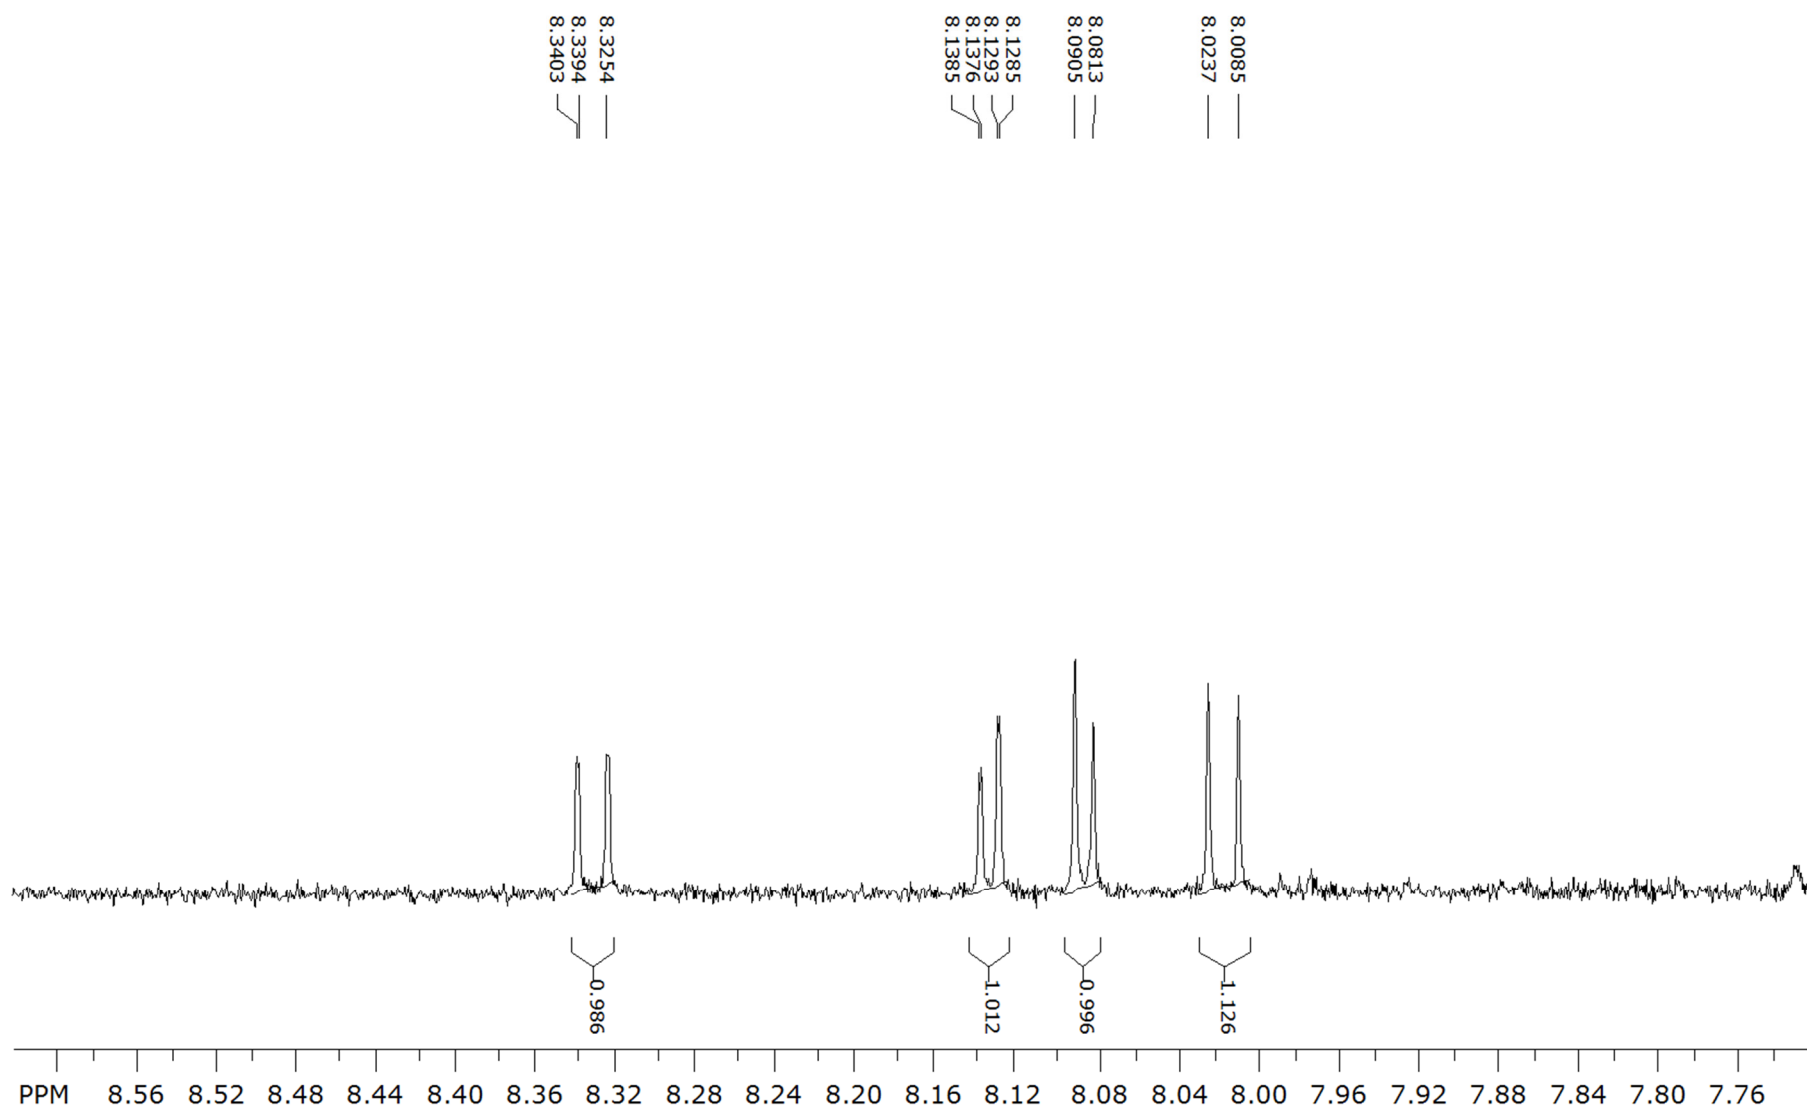

Figure S84.  $^1\text{H}$  NMR ( $\text{CDCl}_3$ ) spectrum of aromatic part of **48**.

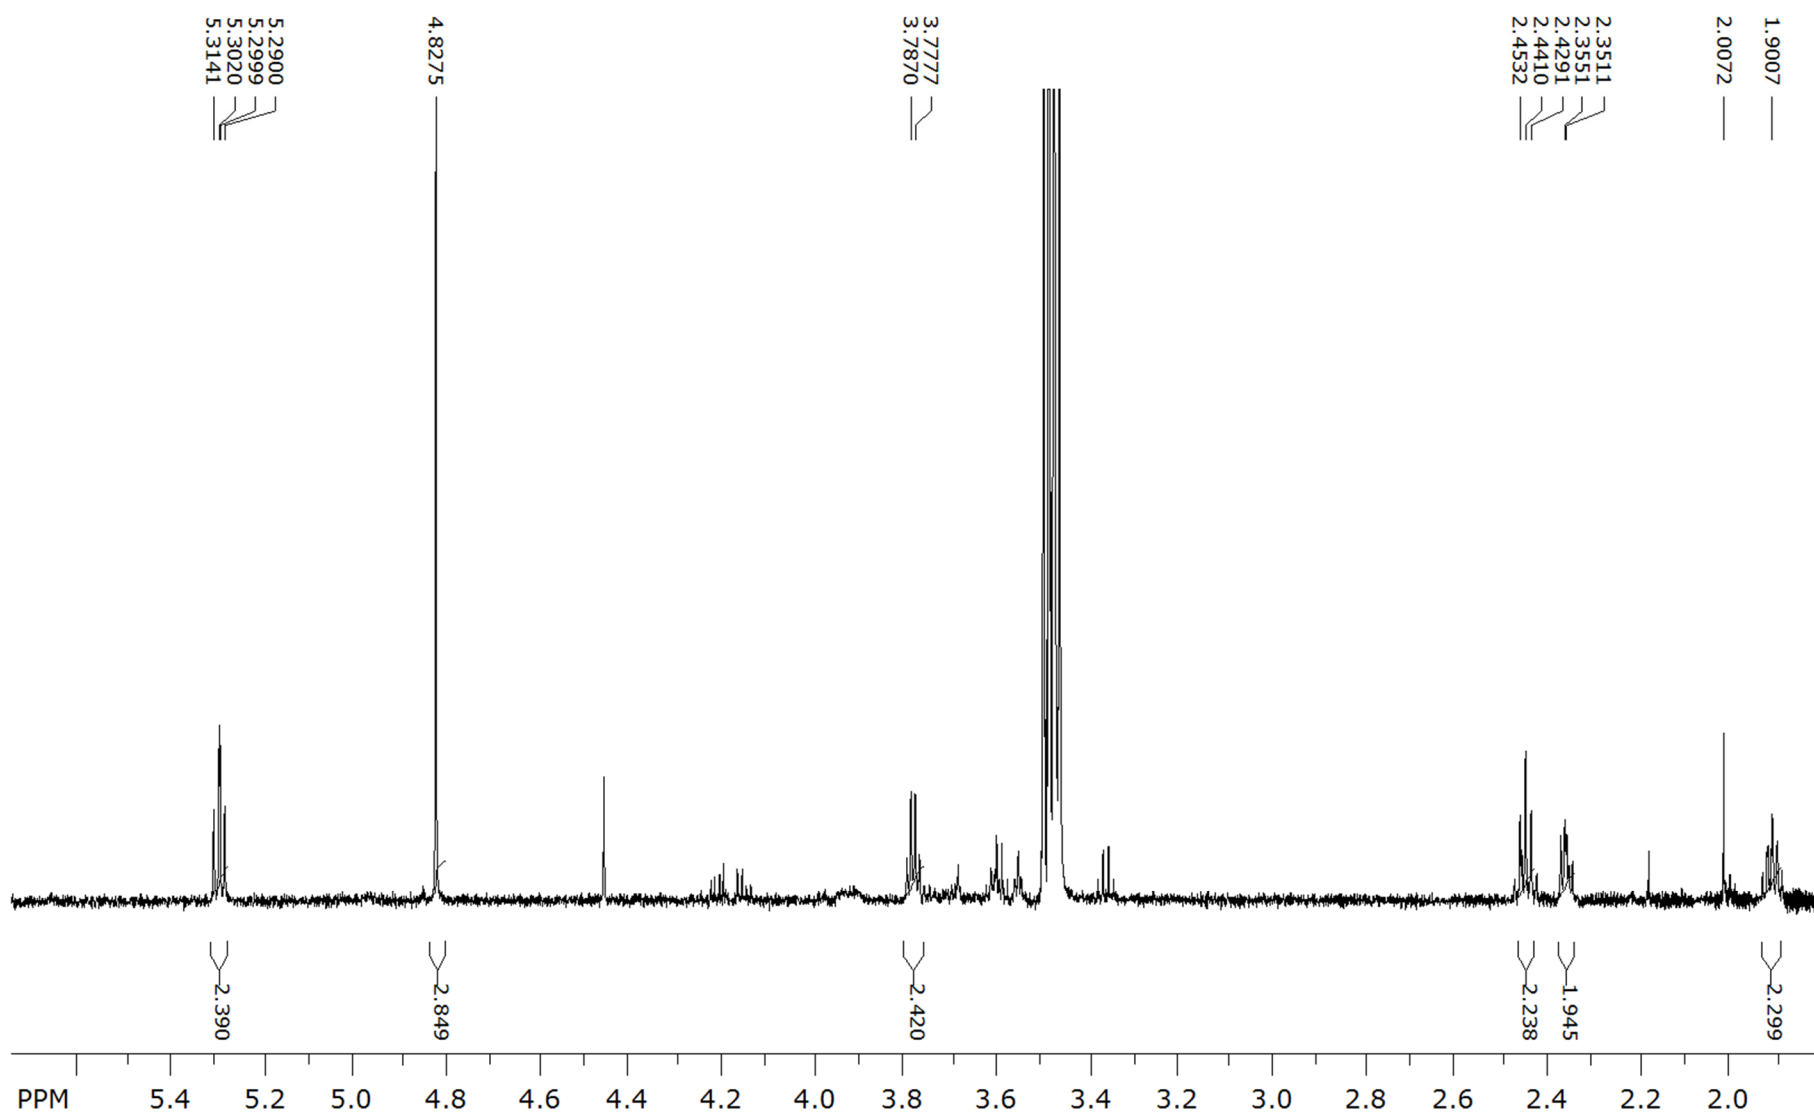

Figure S85. <sup>1</sup>H NMR (CDCl<sub>3</sub>) spectrum of aliphatic part of **48**.

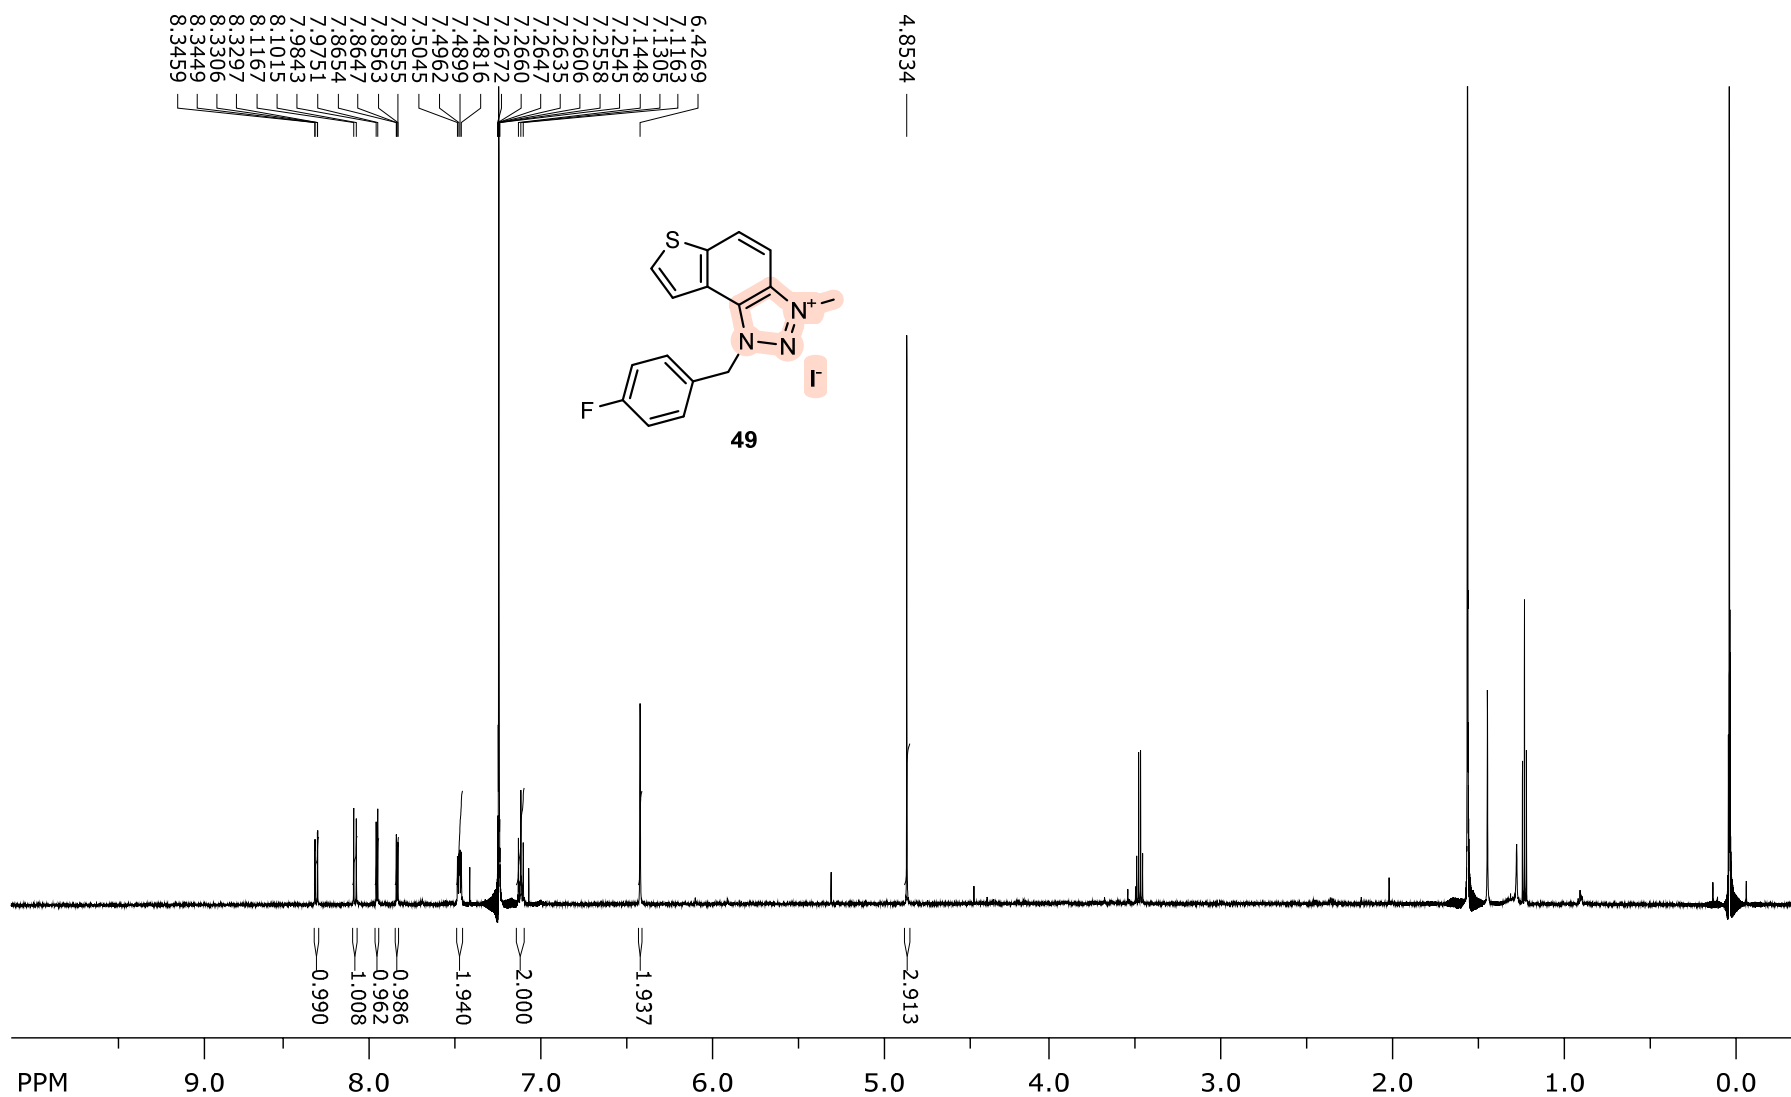

Figure S86.  $^1\text{H}$  NMR ( $\text{CDCl}_3$ ) spectrum of **49**.

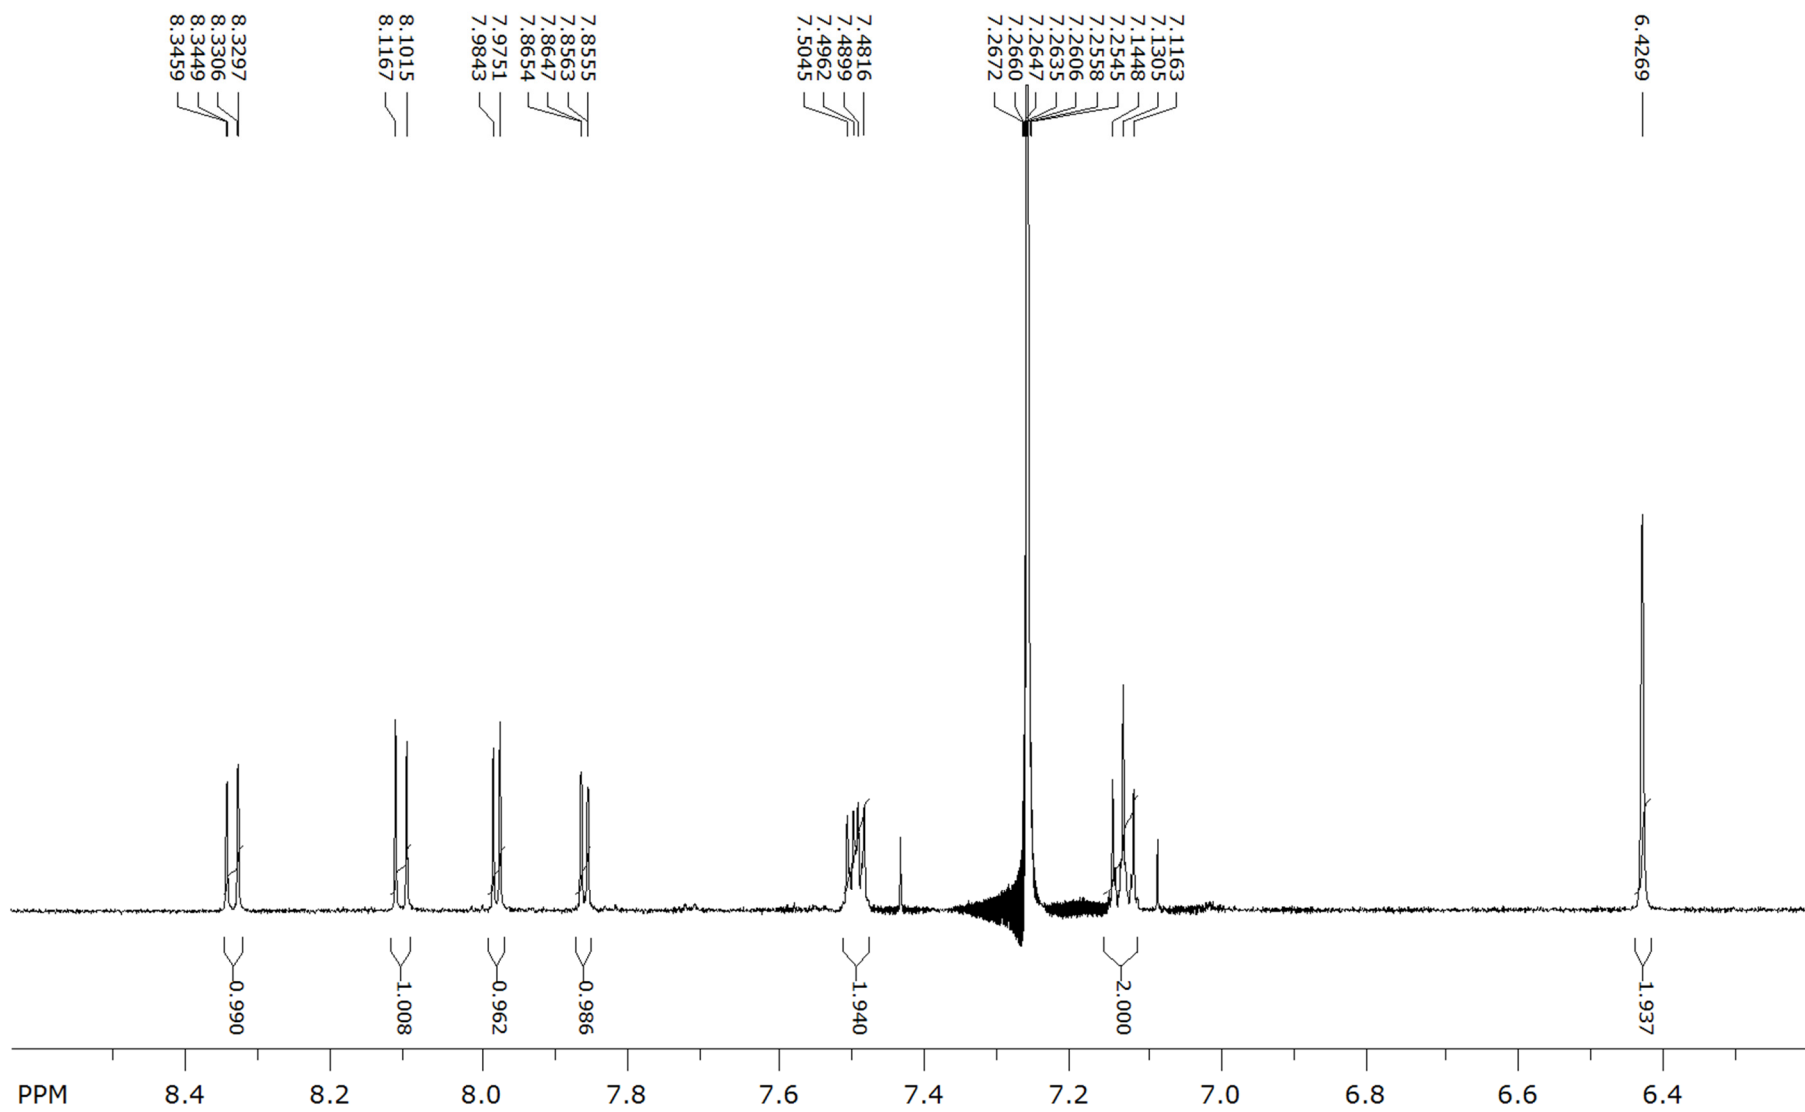

Figure S87. <sup>1</sup>H NMR (CDCl<sub>3</sub>) spectrum of aromatic part of **49**.

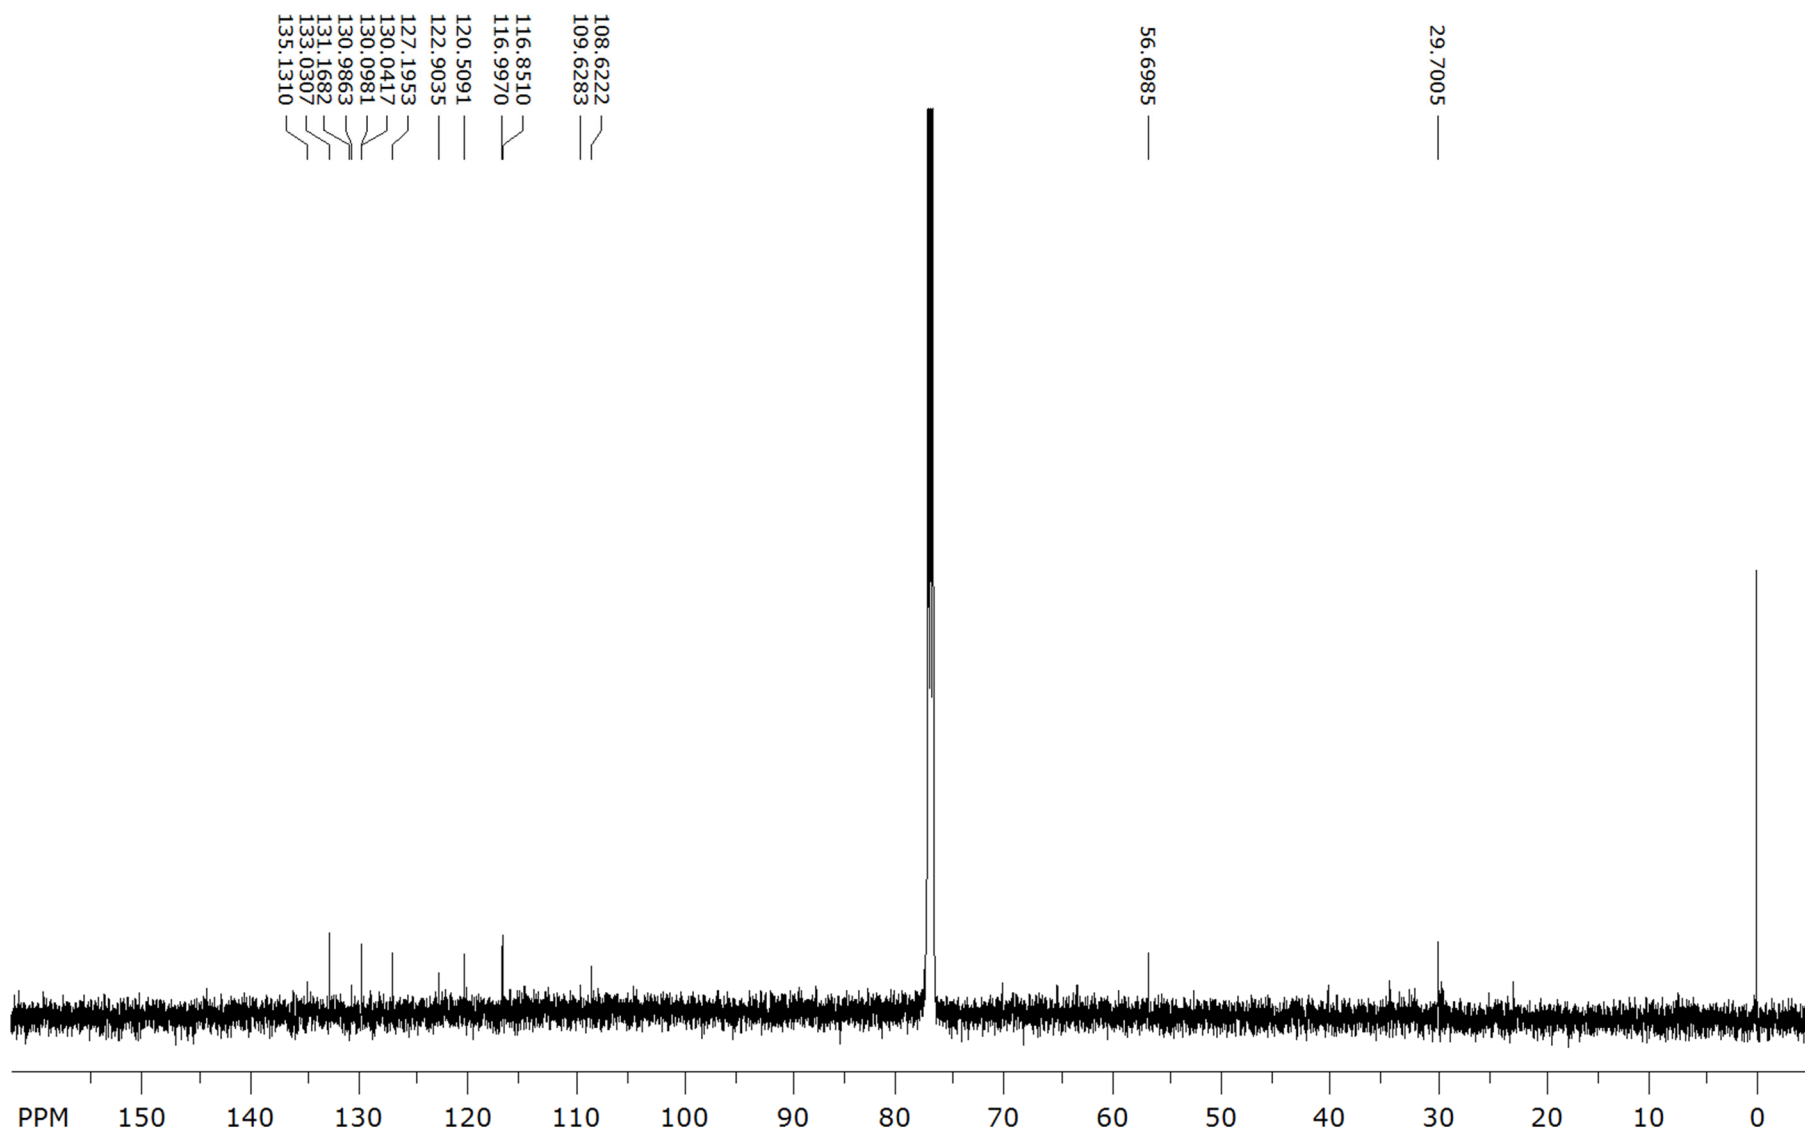

Figure S88. <sup>13</sup>C NMR (CDCl<sub>3</sub>) spectrum of **49**.

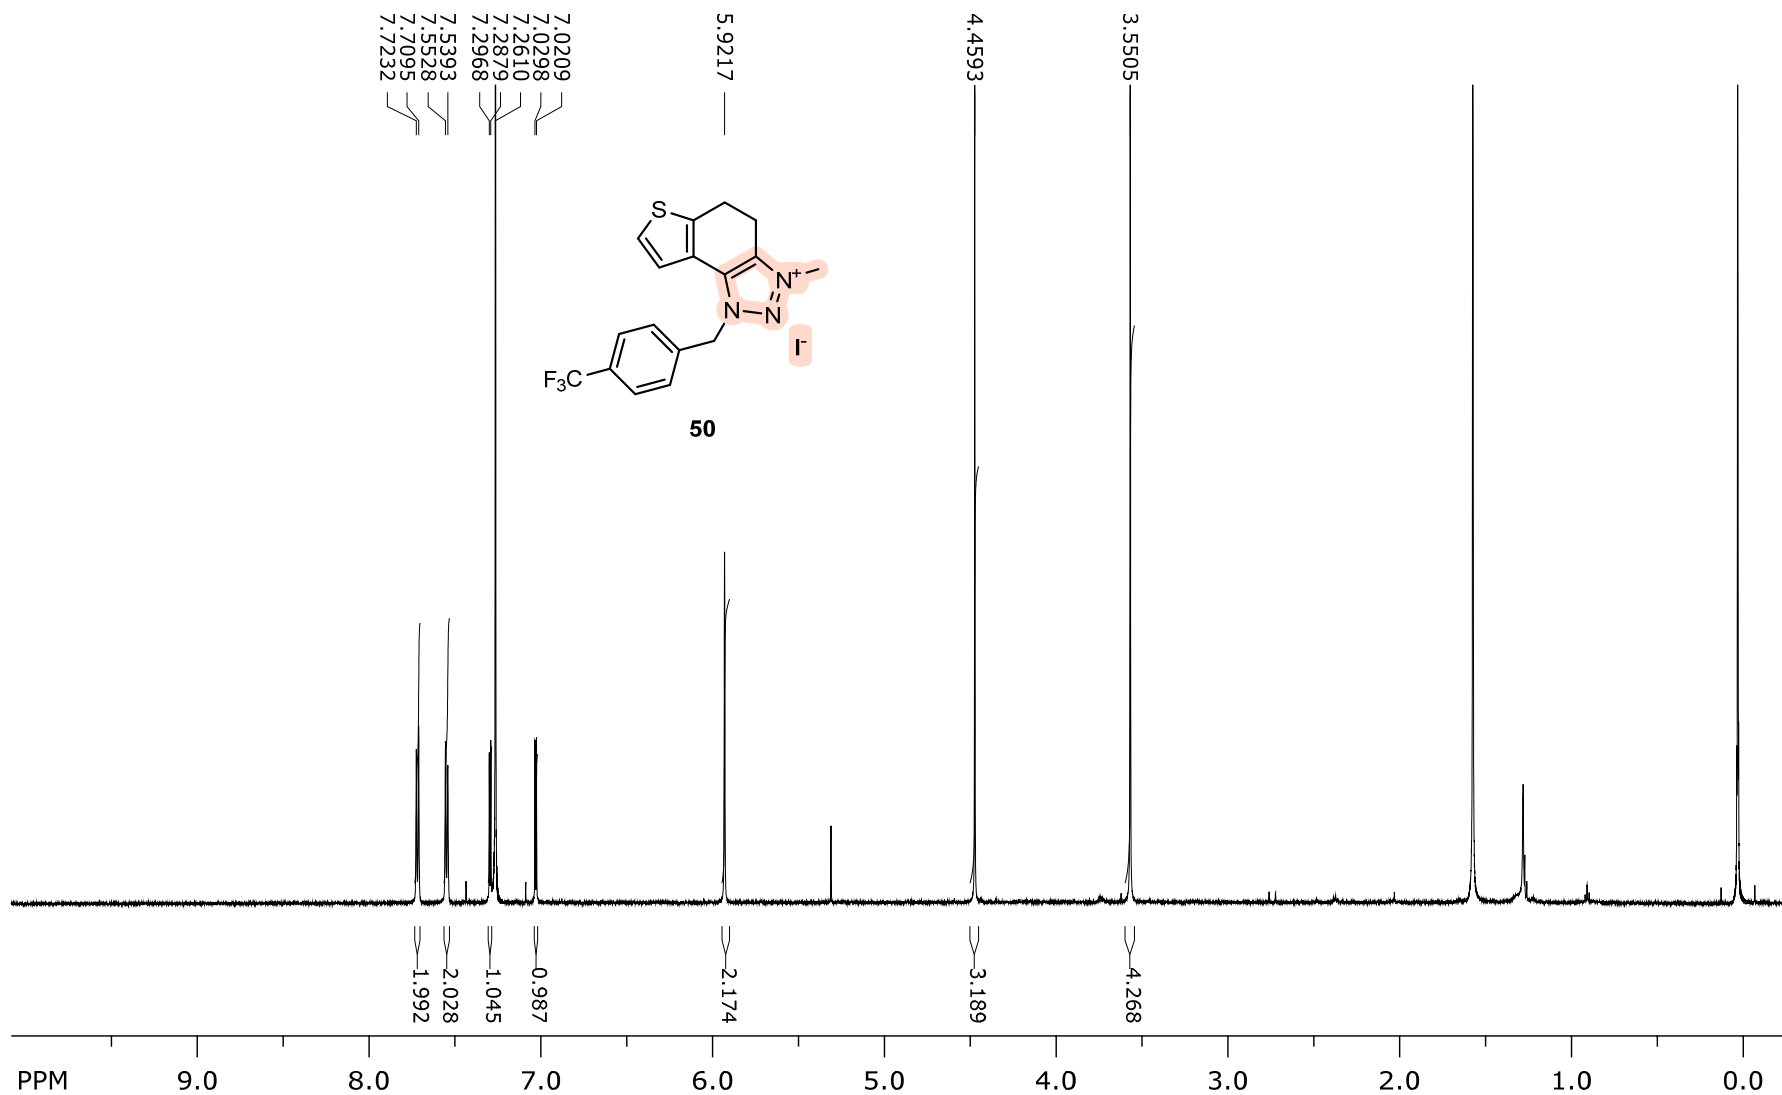

Figure S89.  $^1\text{H}$  NMR ( $\text{CDCl}_3$ ) spectrum of **50**.

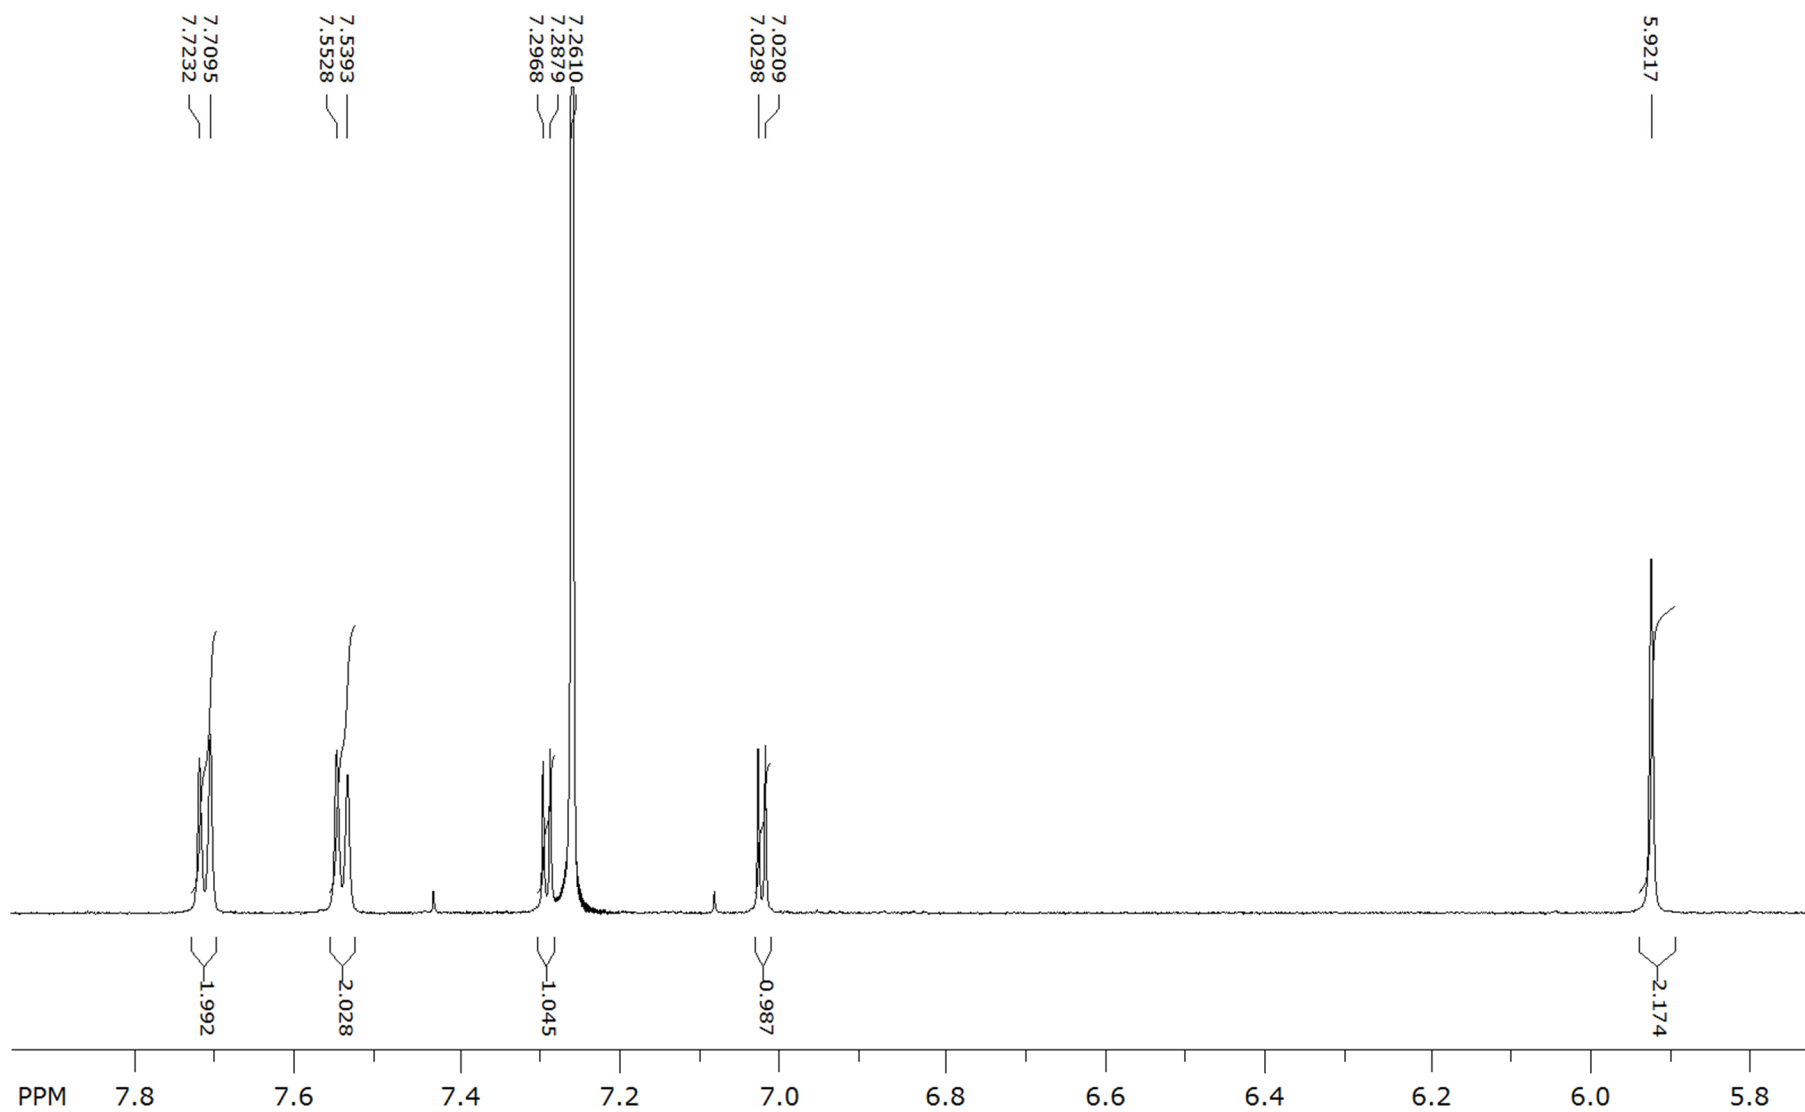

Figure S90.  $^1\text{H}$  NMR ( $\text{CDCl}_3$ ) spectrum of aromatic part of **50**.

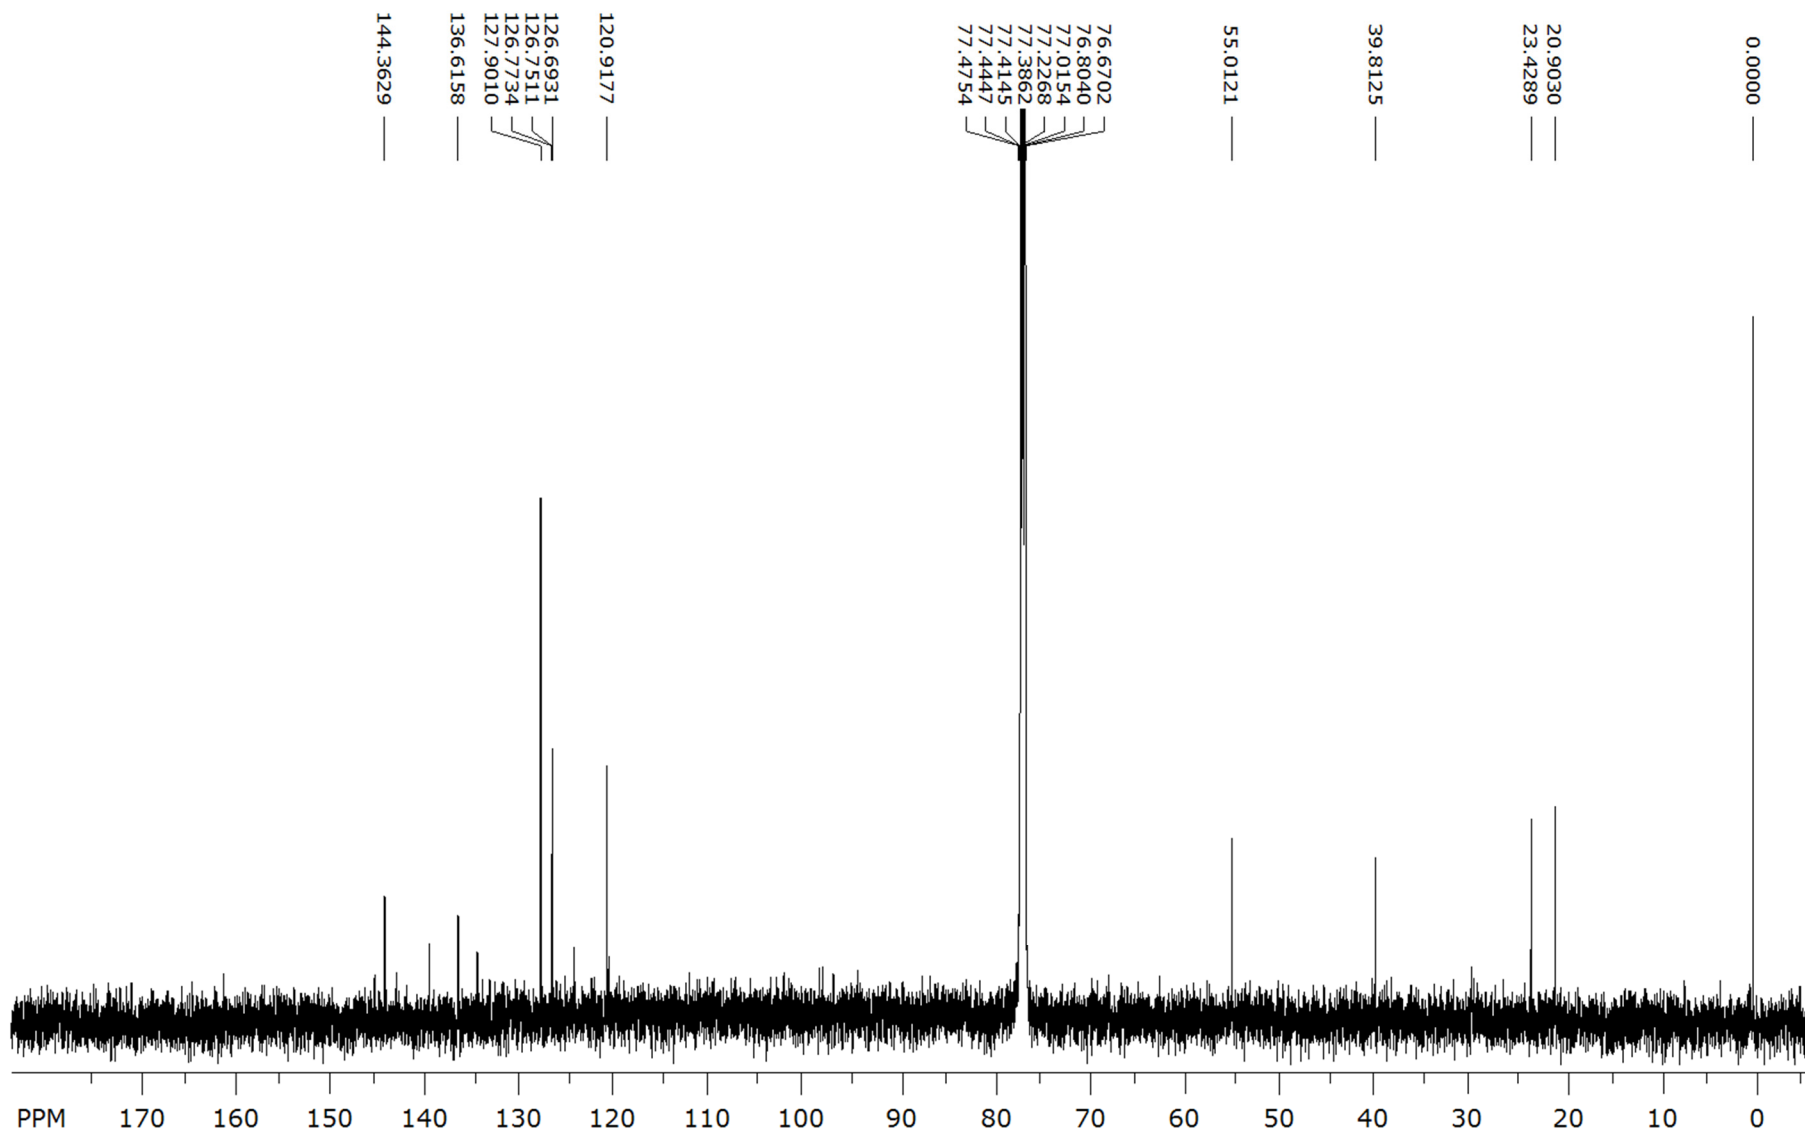

Figure S91. <sup>13</sup>C NMR (CDCl<sub>3</sub>) spectrum of **50**.



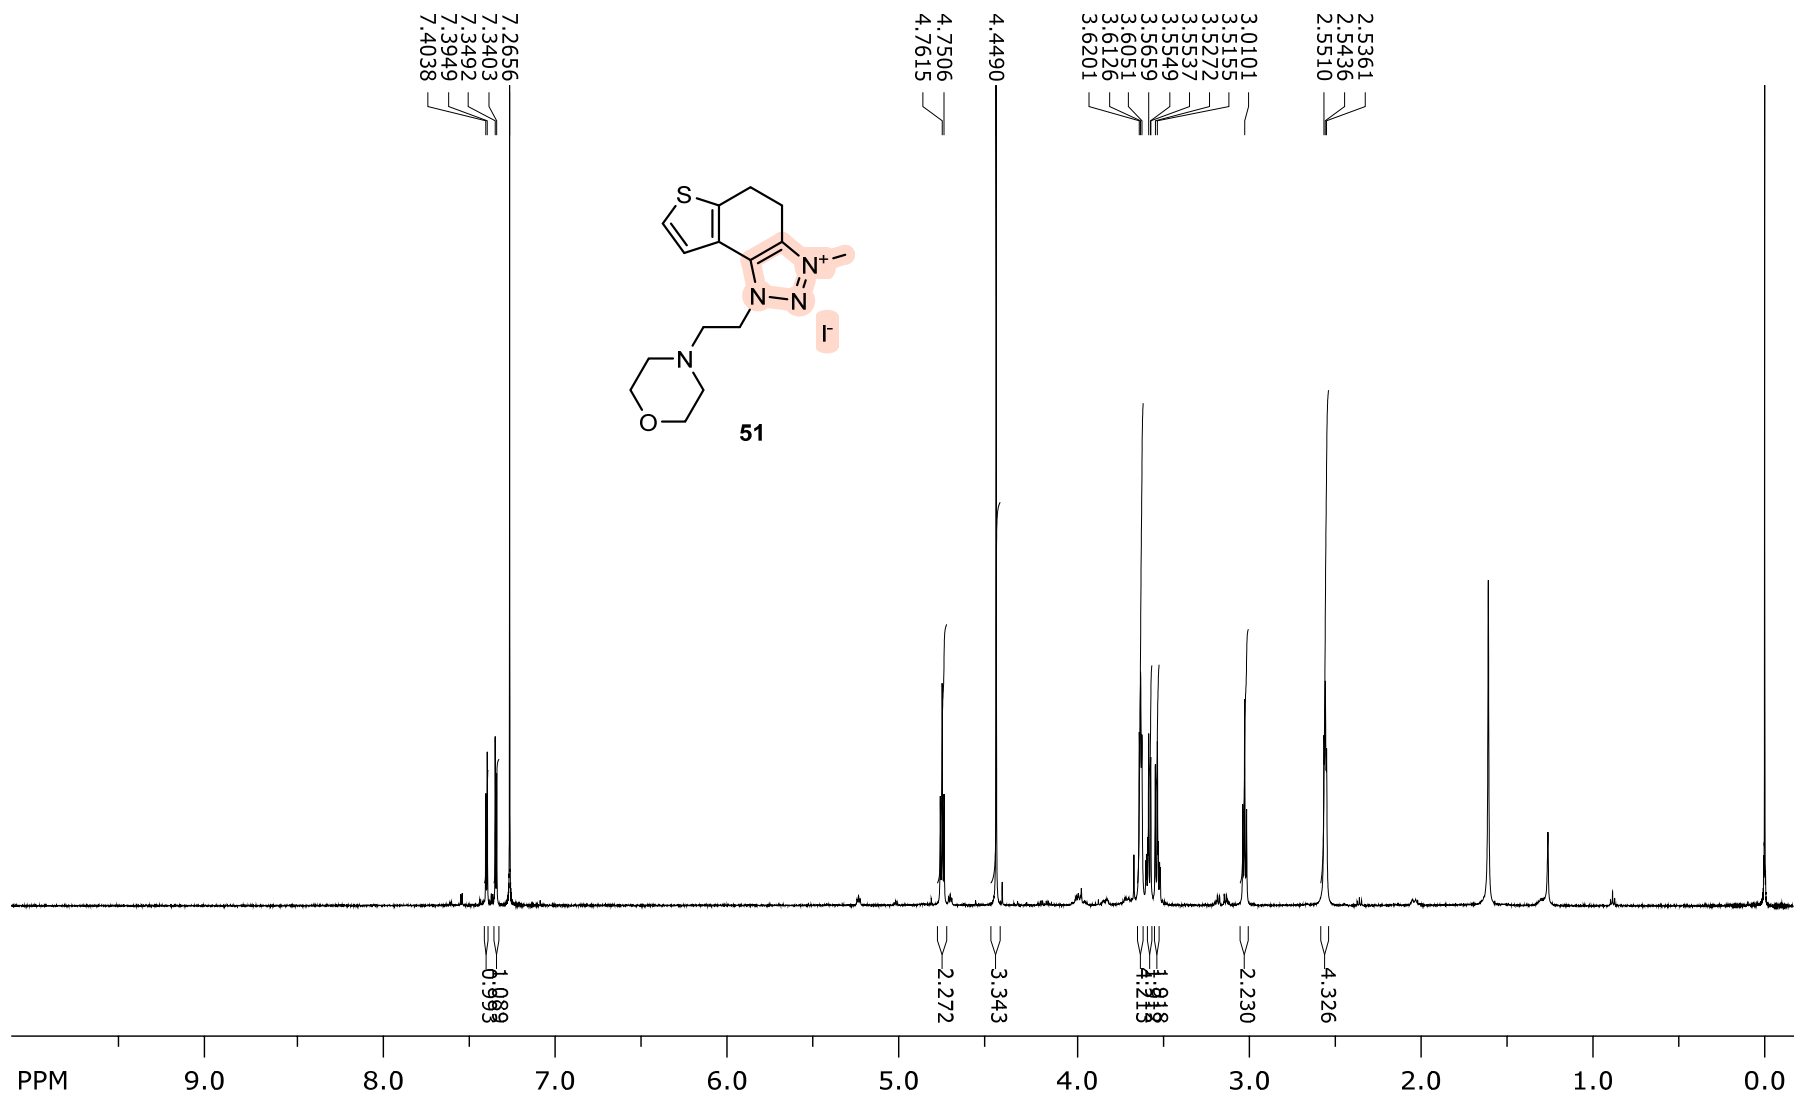

Figure S92. <sup>1</sup>H NMR (CDCl<sub>3</sub>) spectrum of **51**.

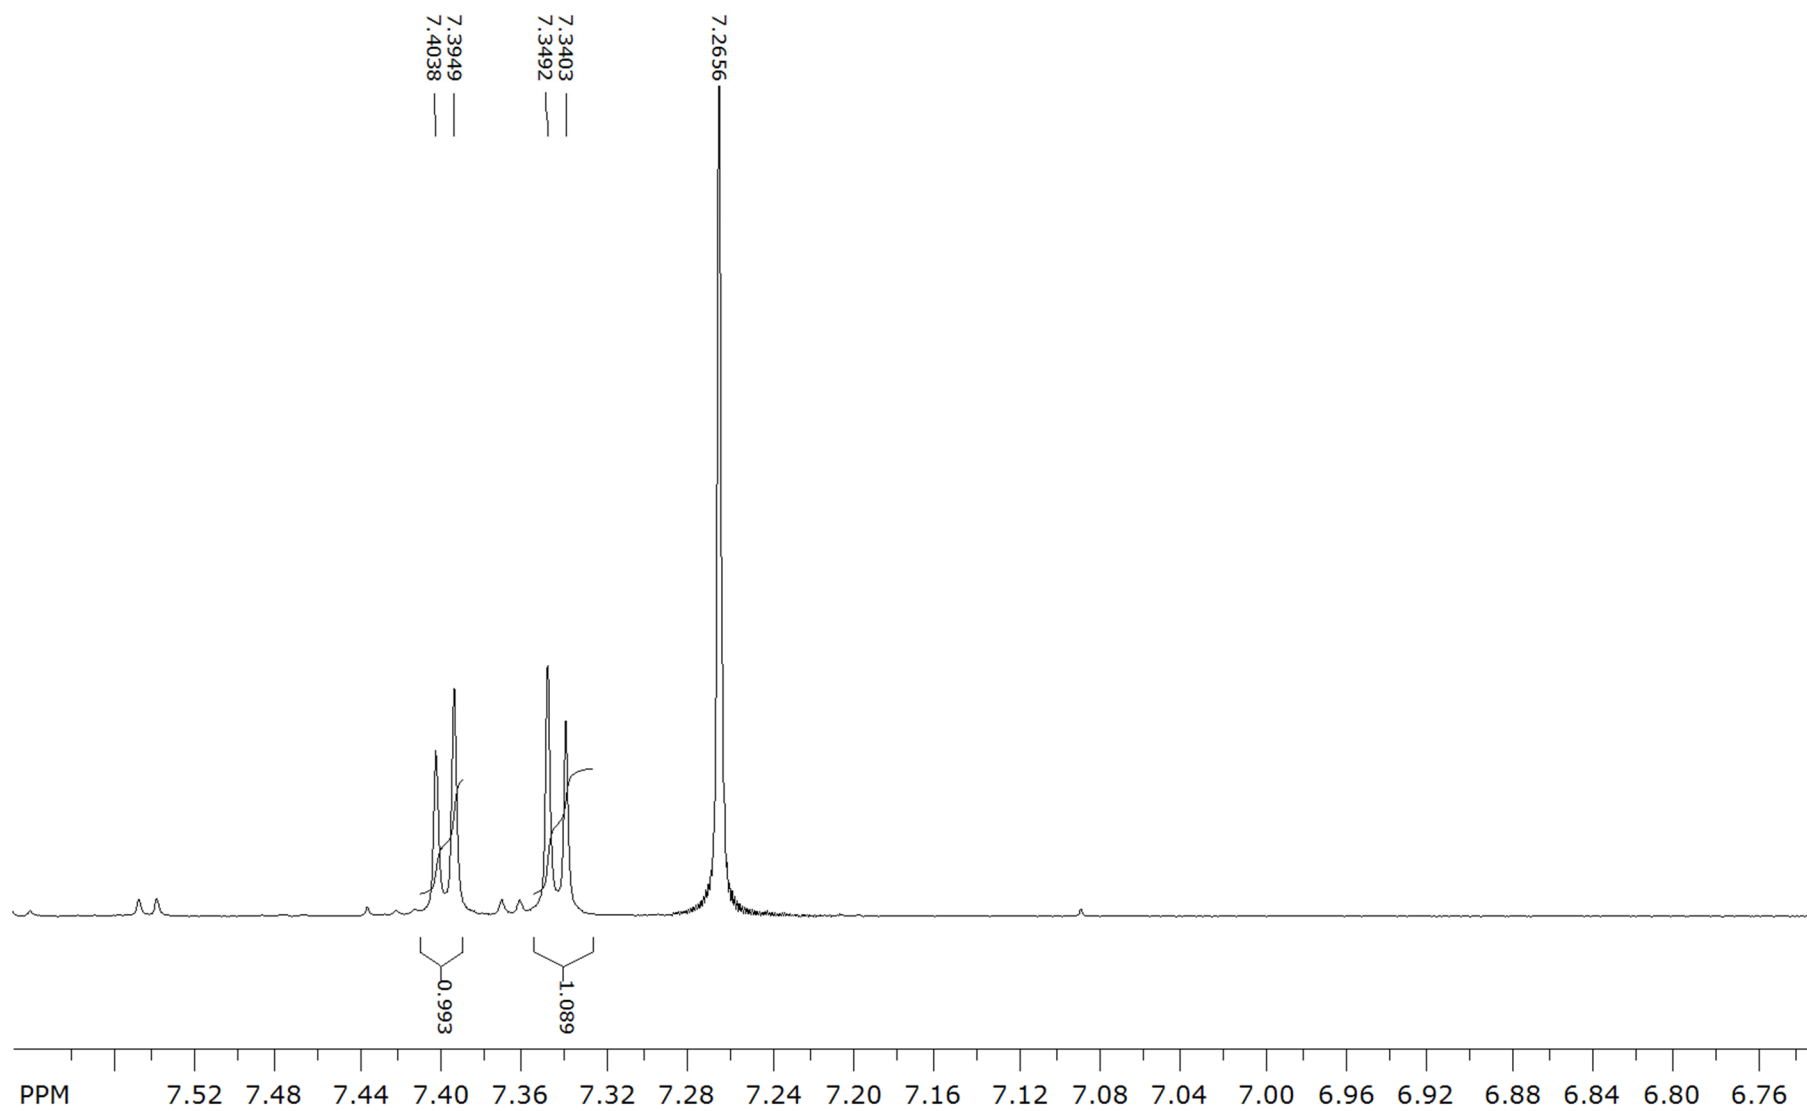

Figure S93.  $^1\text{H}$  NMR ( $\text{CDCl}_3$ ) spectrum of aromatic part of **51**.

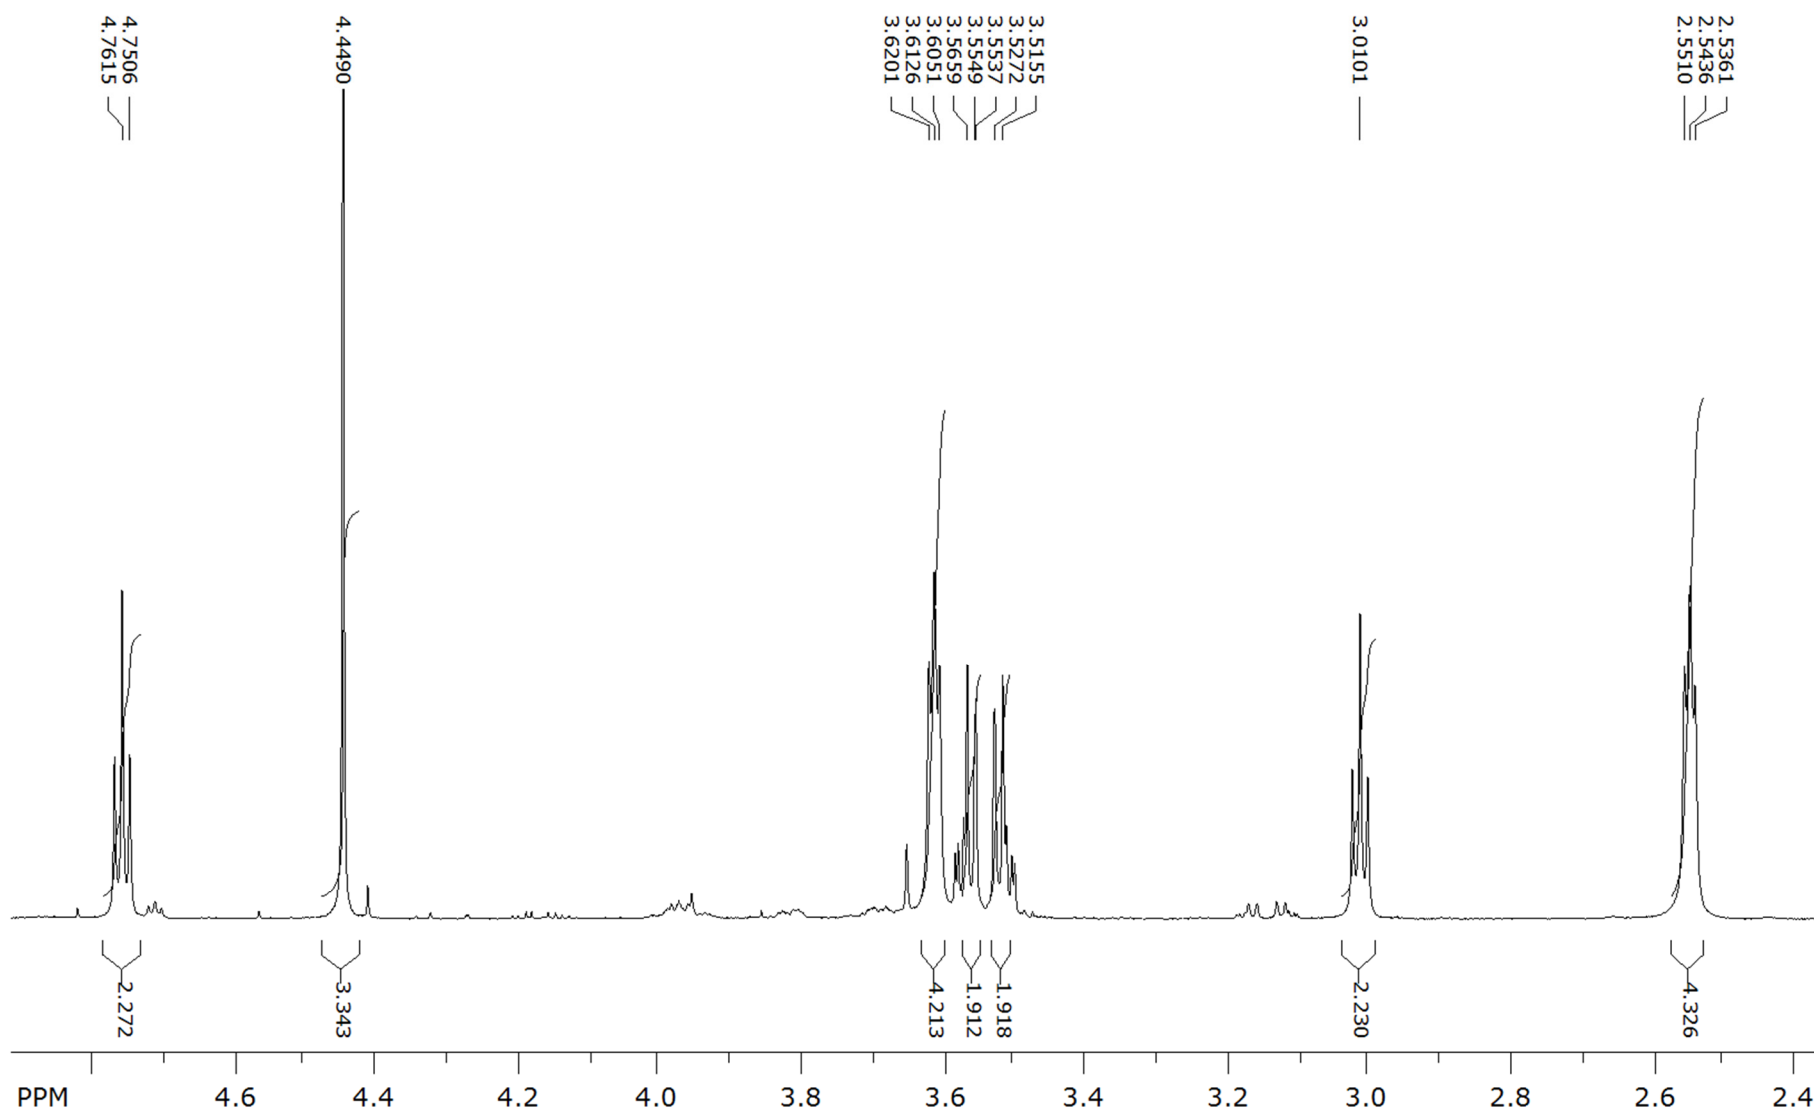

Figure S94. <sup>1</sup>H NMR (CDCl<sub>3</sub>) spectrum of aliphatic part of **51**.

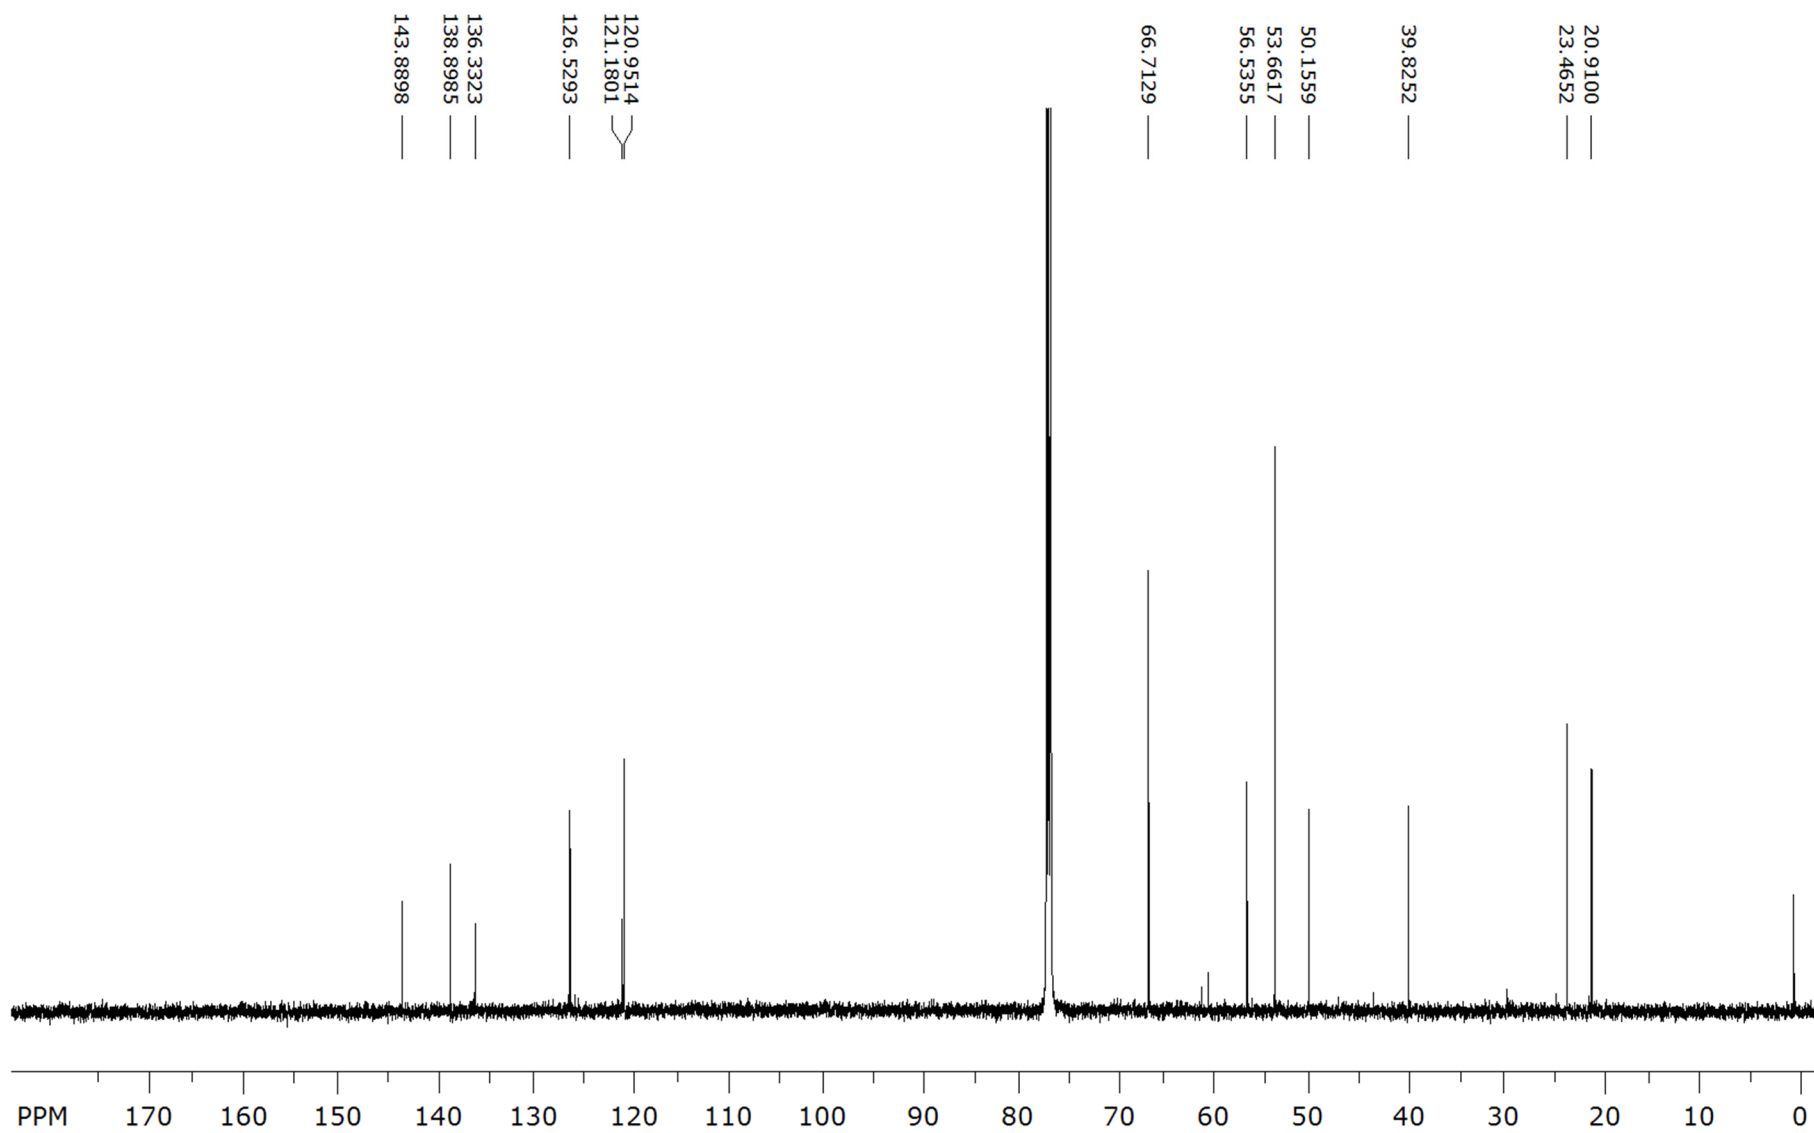

Figure S95. <sup>13</sup>C NMR (CDCl<sub>3</sub>) spectrum of **51**.

## 2. Mass spectra and HRMS analyses

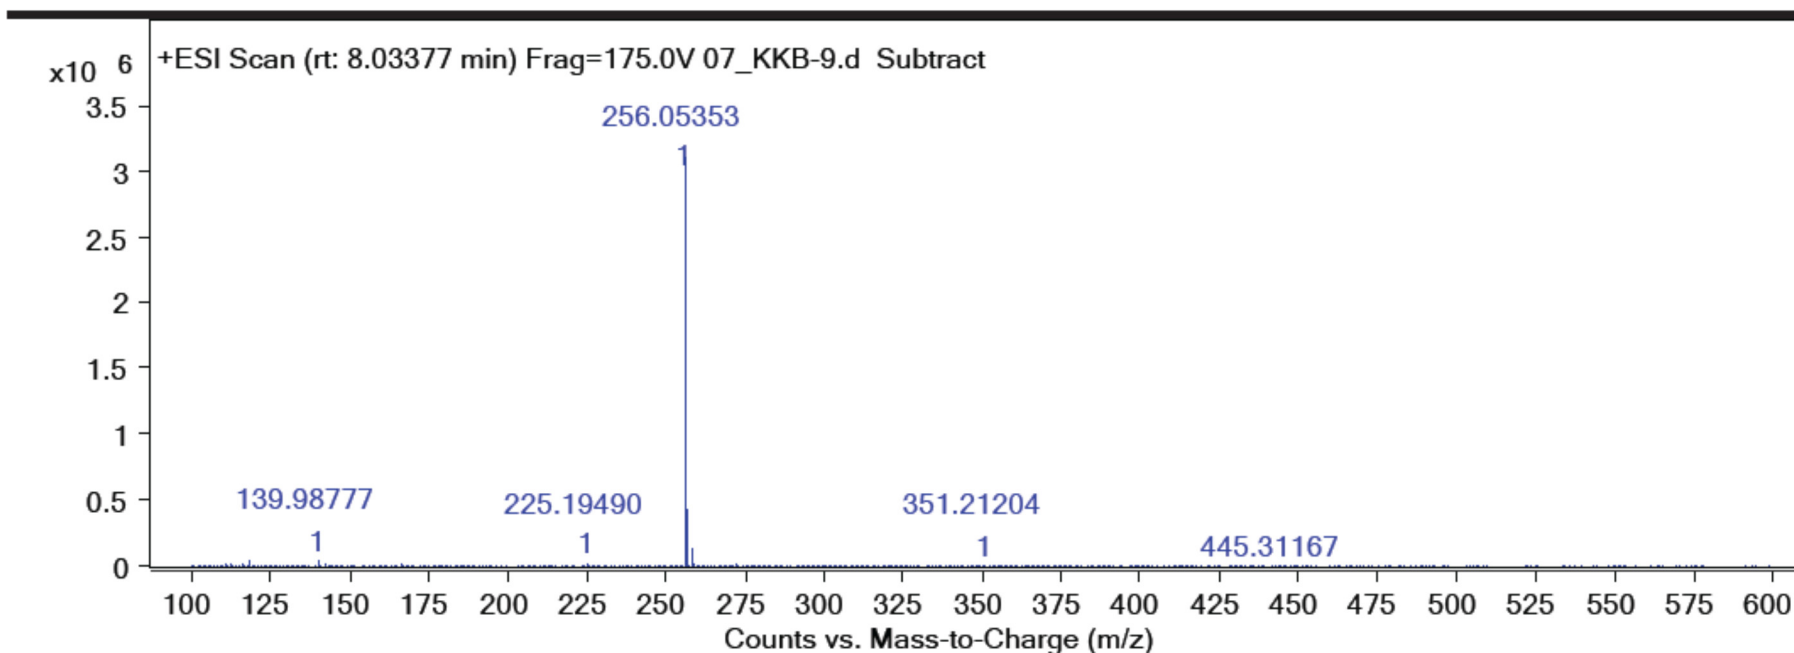

### Formula Calculator Results

| Formula       | Best | Mass      | Tgt Mass  | Diff (ppm) | Ion Species    | Score |
|---------------|------|-----------|-----------|------------|----------------|-------|
| C13 H9 N3 O S | True | 255.04633 | 255.04663 | 1.2        | C13 H10 N3 O S | 96.98 |

Figure S96. Mass spectrum and HRMS analysis of compound **23**.

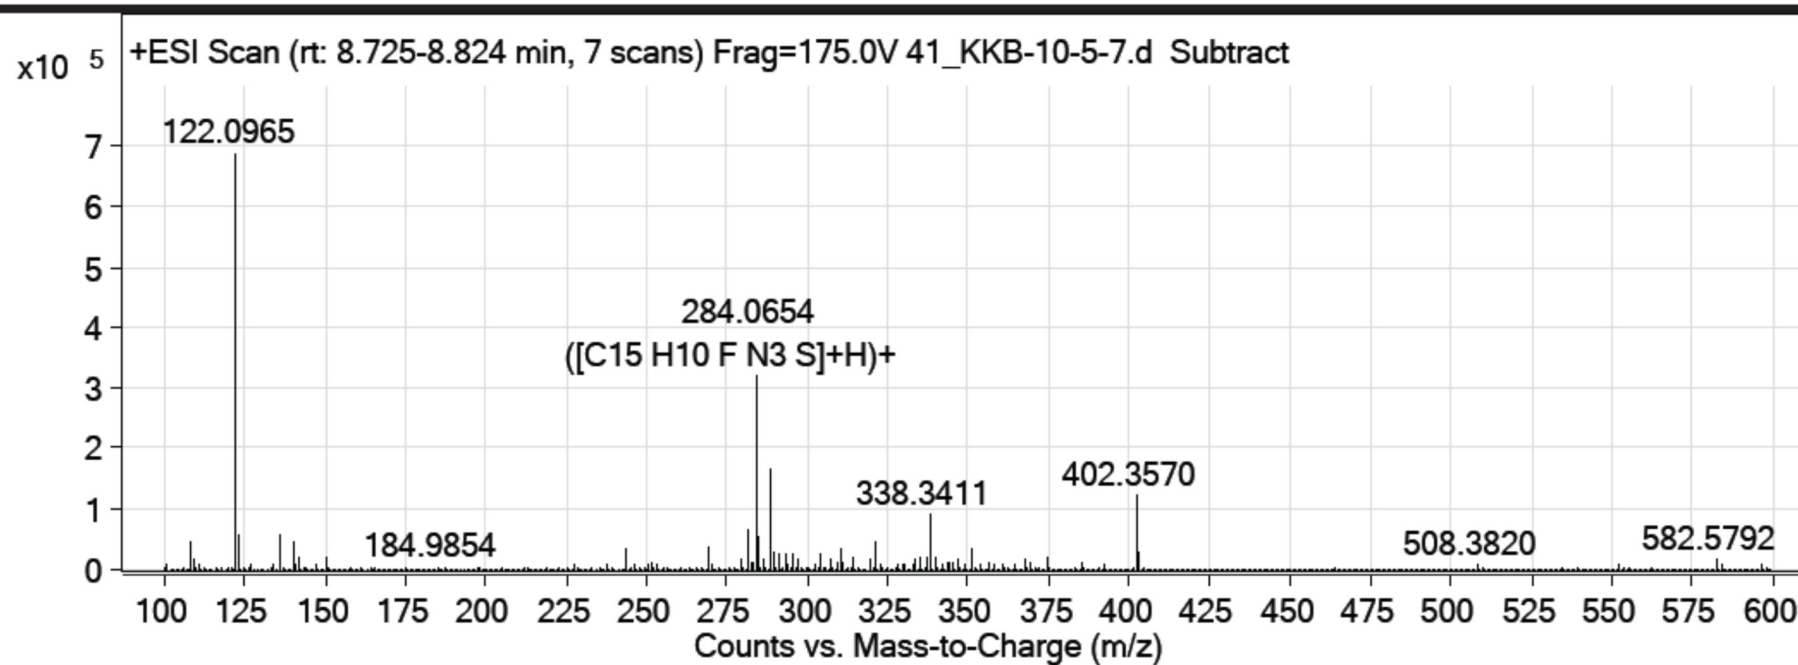

#### Formula Calculator Results

| Formula        | Best | Mass     | Tgt Mass | Diff (ppm) | Ion Species    | Score |
|----------------|------|----------|----------|------------|----------------|-------|
| C15 H10 F N3 S | True | 283.0581 | 283.0579 | -0.53      | C15 H11 F N3 S | 98.47 |

Figure S97. Mass spectrum and HRMS analysis of compound **24**.

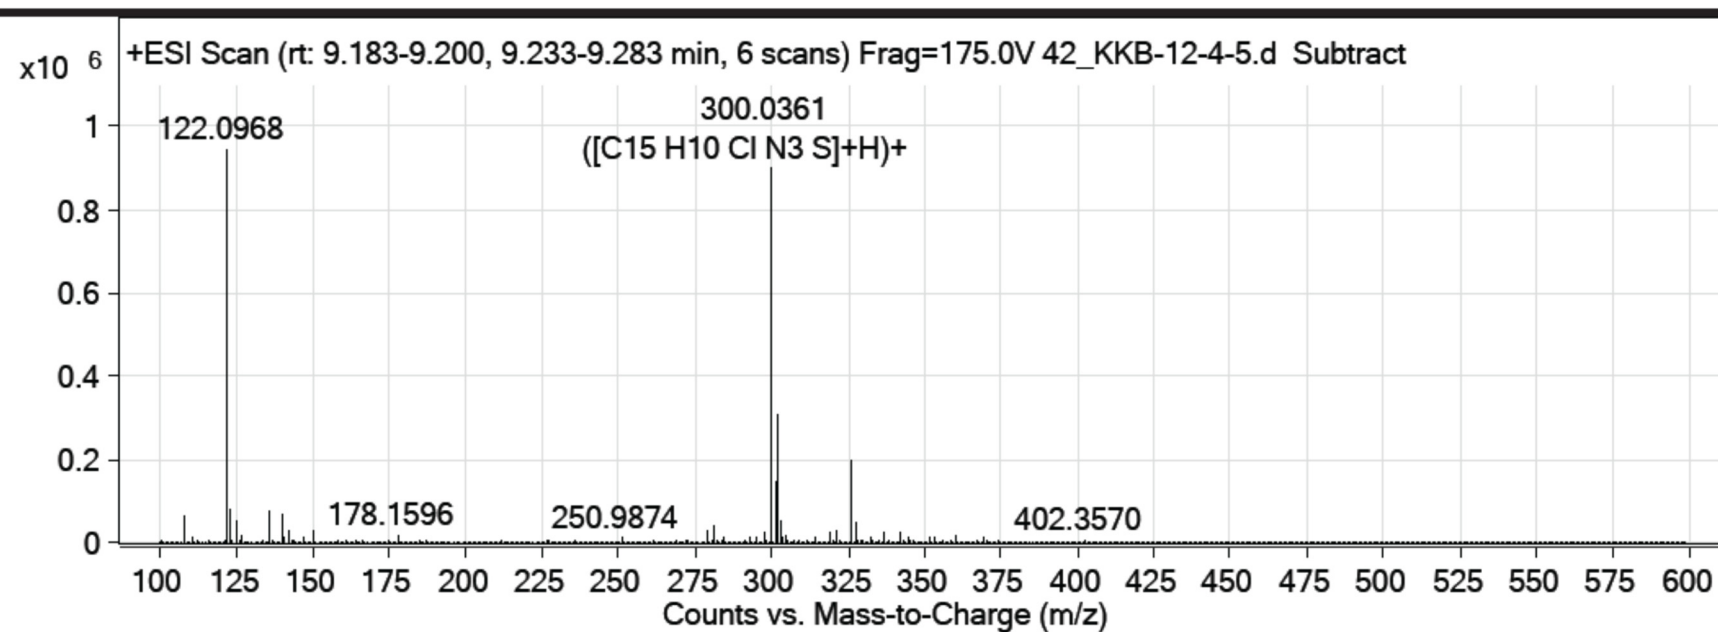

#### Formula Calculator Results

| Formula                                             | Best | Mass     | Tgt Mass | Diff (ppm) | Ion Species                                         | Score |
|-----------------------------------------------------|------|----------|----------|------------|-----------------------------------------------------|-------|
| C <sub>15</sub> H <sub>10</sub> Cl N <sub>3</sub> S | True | 299.0288 | 299.0284 | -1.5       | C <sub>15</sub> H <sub>11</sub> Cl N <sub>3</sub> S | 97.66 |

Figure S98. Mass spectrum and HRMS analysis of compound **26**.

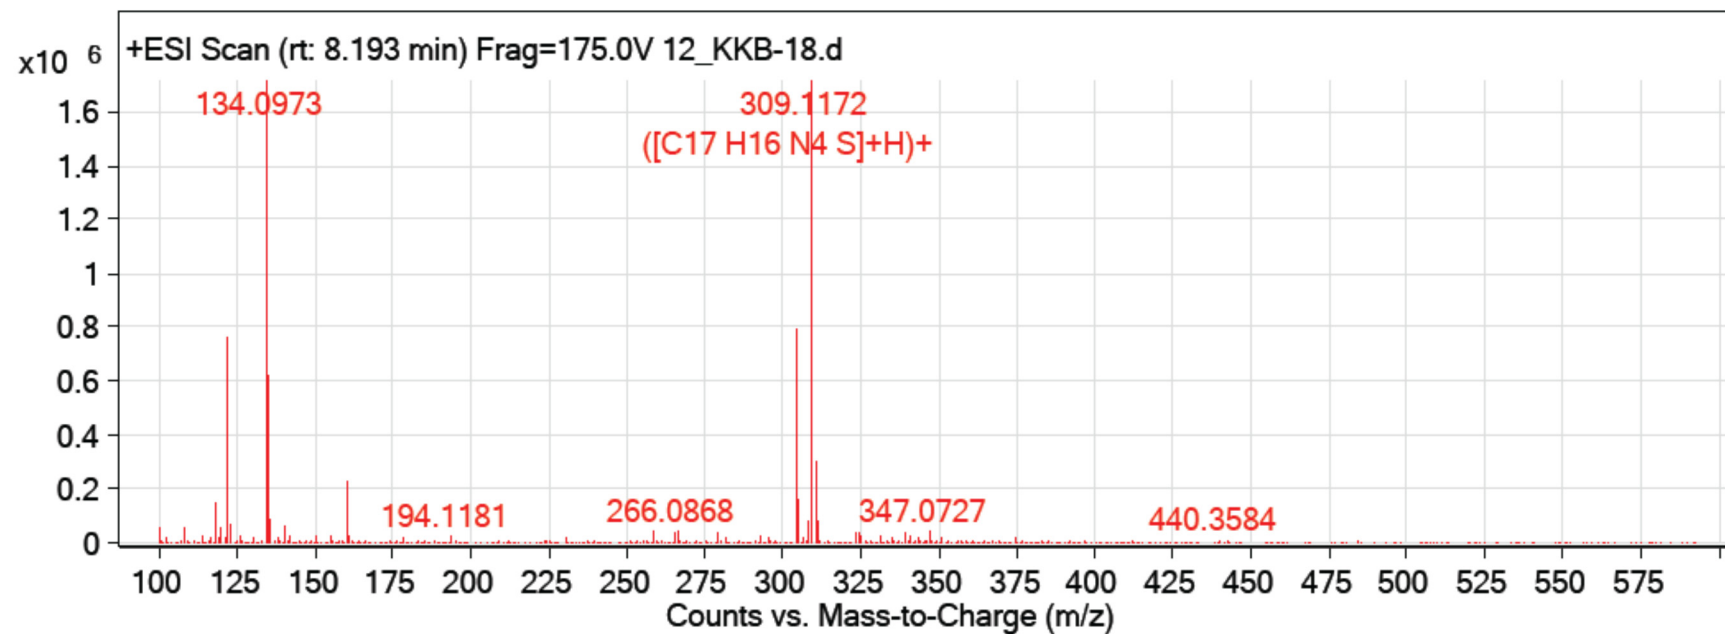

#### Formula Calculator Results

| Formula      | Best | Mass   | Tgt Mass | Diff (ppm) | Ion Species  | Score |
|--------------|------|--------|----------|------------|--------------|-------|
| C17 H16 N4 S | True | 308.11 | 308.1096 | -1.44      | C17 H17 N4 S | 96.35 |

Figure S99. Mass spectrum and HRMS analysis of compound **27**.



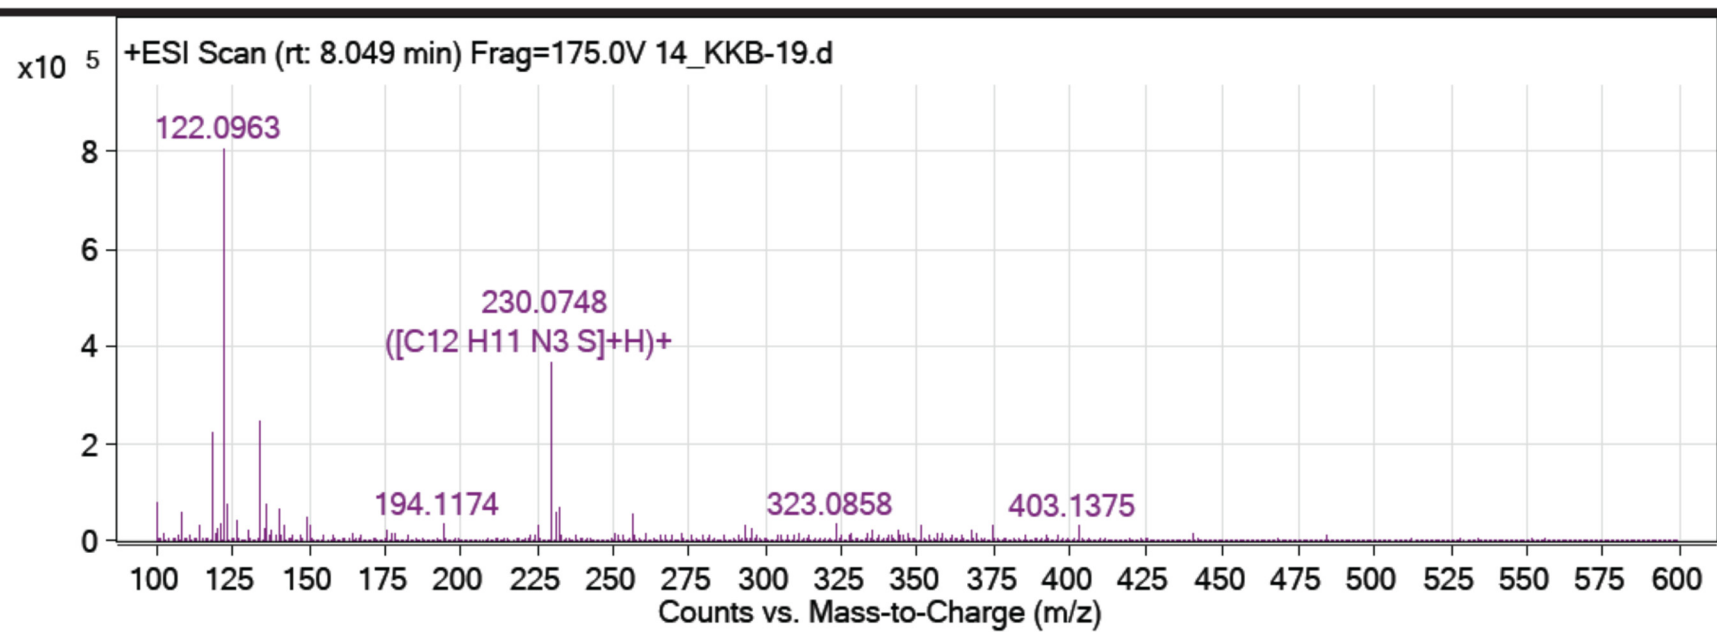

#### Formula Calculator Results

| Formula      | Best | Mass     | Tgt Mass | Diff (ppm) | Ion Species  | Score |
|--------------|------|----------|----------|------------|--------------|-------|
| C12 H11 N3 S | True | 229.0676 | 229.0674 | -0.87      | C12 H12 N3 S | 47.44 |

Figure S100. Mass spectrum and HRMS analysis of compound **28**.

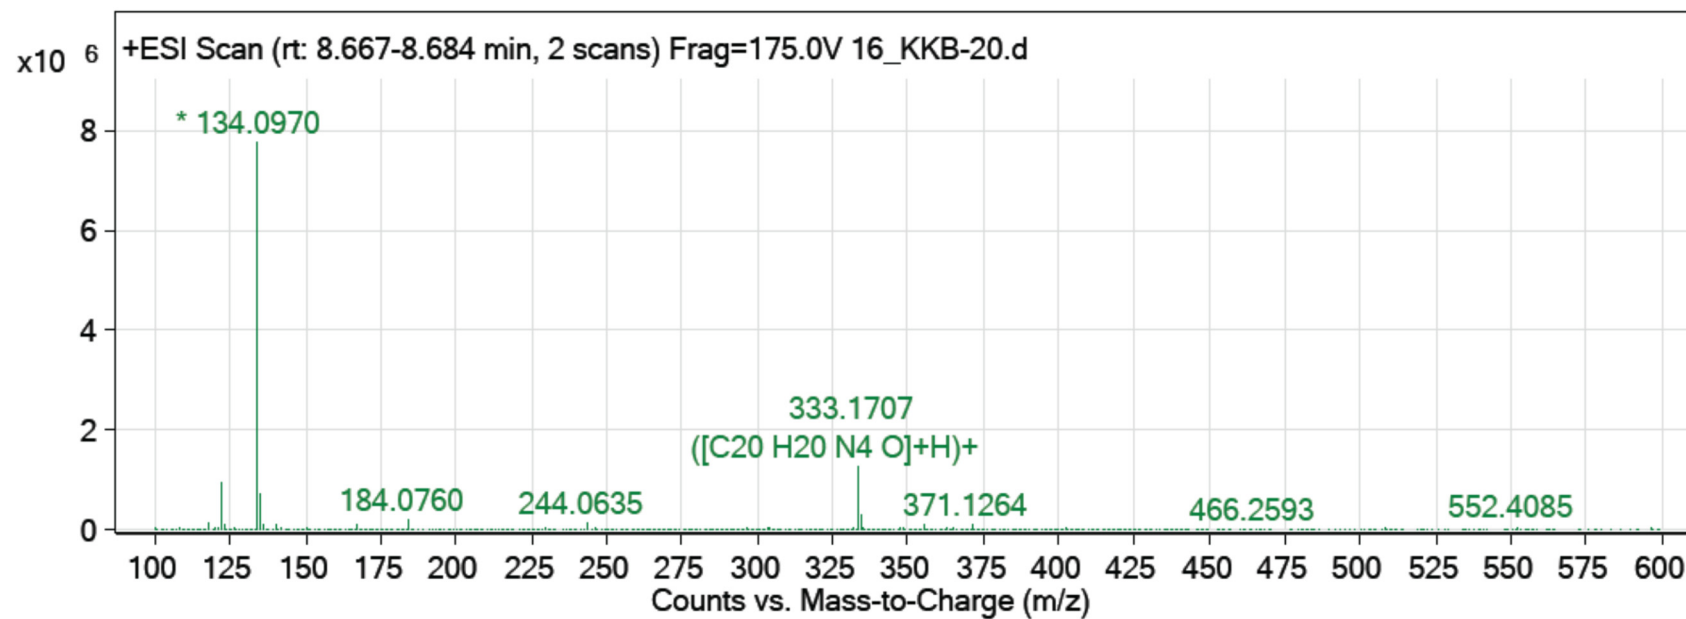

#### Formula Calculator Results

| Formula                                          | Best | Mass     | Tgt Mass | Diff (ppm) | Ion Species                                      | Score |
|--------------------------------------------------|------|----------|----------|------------|--------------------------------------------------|-------|
| C <sub>20</sub> H <sub>20</sub> N <sub>4</sub> O | True | 332.1635 | 332.1637 | 0.64       | C <sub>20</sub> H <sub>21</sub> N <sub>4</sub> O | 98.1  |

Figure S101. Mass spectrum and HRMS analysis of compound **30**.

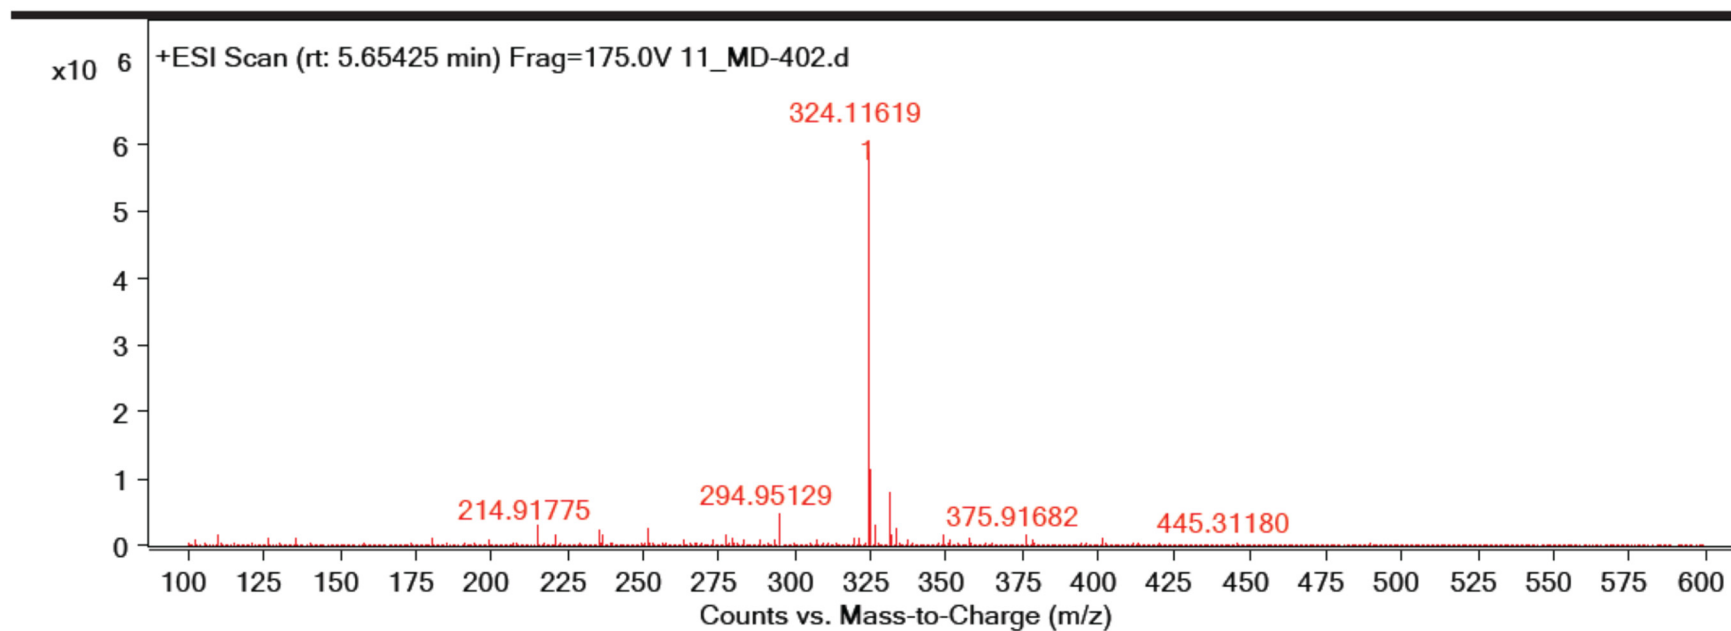

#### Formula Calculator Results

| Formula        | Best | Mass      | Tgt Mass  | Diff (ppm) | Ion Species    | Score |
|----------------|------|-----------|-----------|------------|----------------|-------|
| C18 H17 N3 O S | True | 323.10892 | 323.10923 | 0.97       | C18 H18 N3 O S | 97.78 |

Figure S102. Mass spectrum and HRMS analysis of compound **44**.

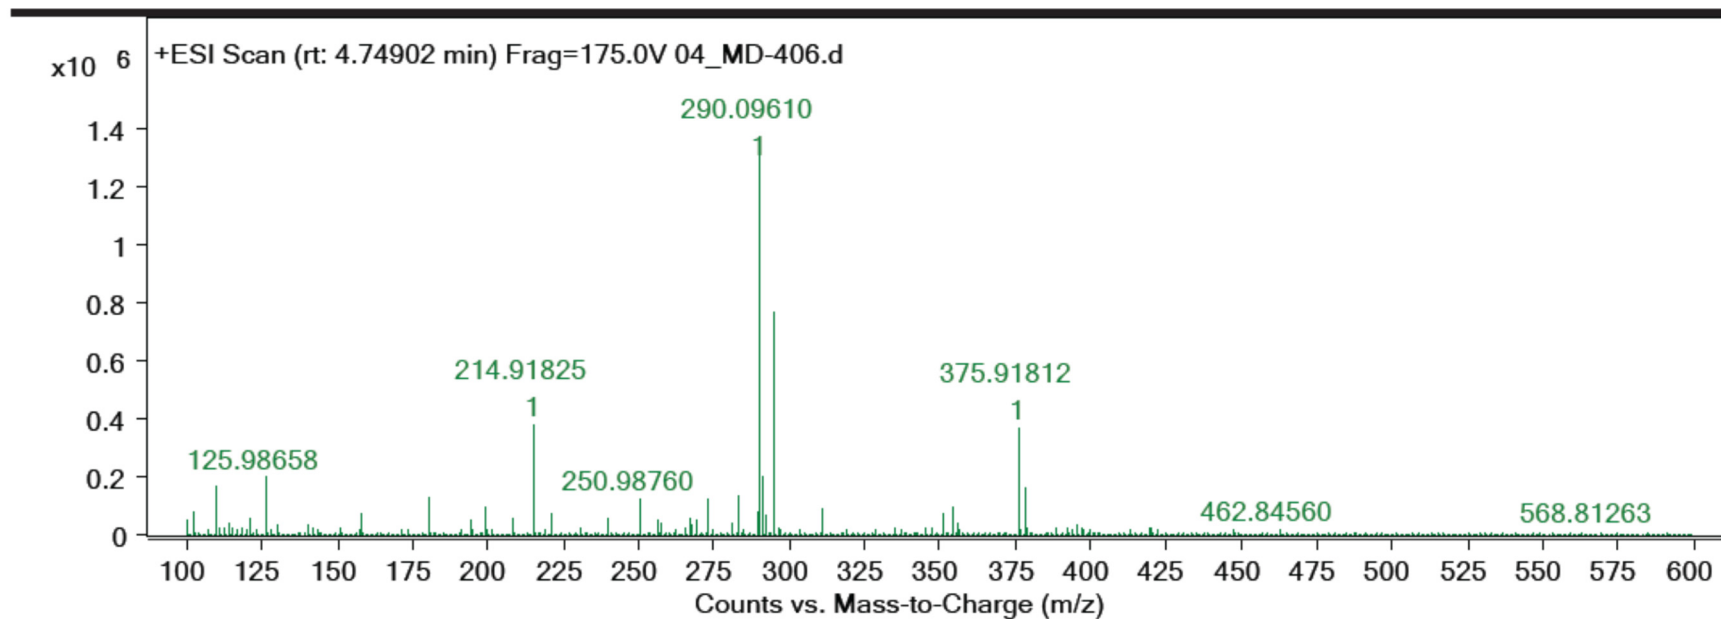

#### Formula Calculator Results

| Formula         | Best | Mass      | Tgt Mass | Diff (ppm) | Ion Species     | Score |
|-----------------|------|-----------|----------|------------|-----------------|-------|
| C14 H15 N3 O2 S | True | 289.08892 | 289.0885 | -1.46      | C14 H16 N3 O2 S | 96.73 |

Figure S103. Mass spectrum and HRMS analysis of compound **45**.

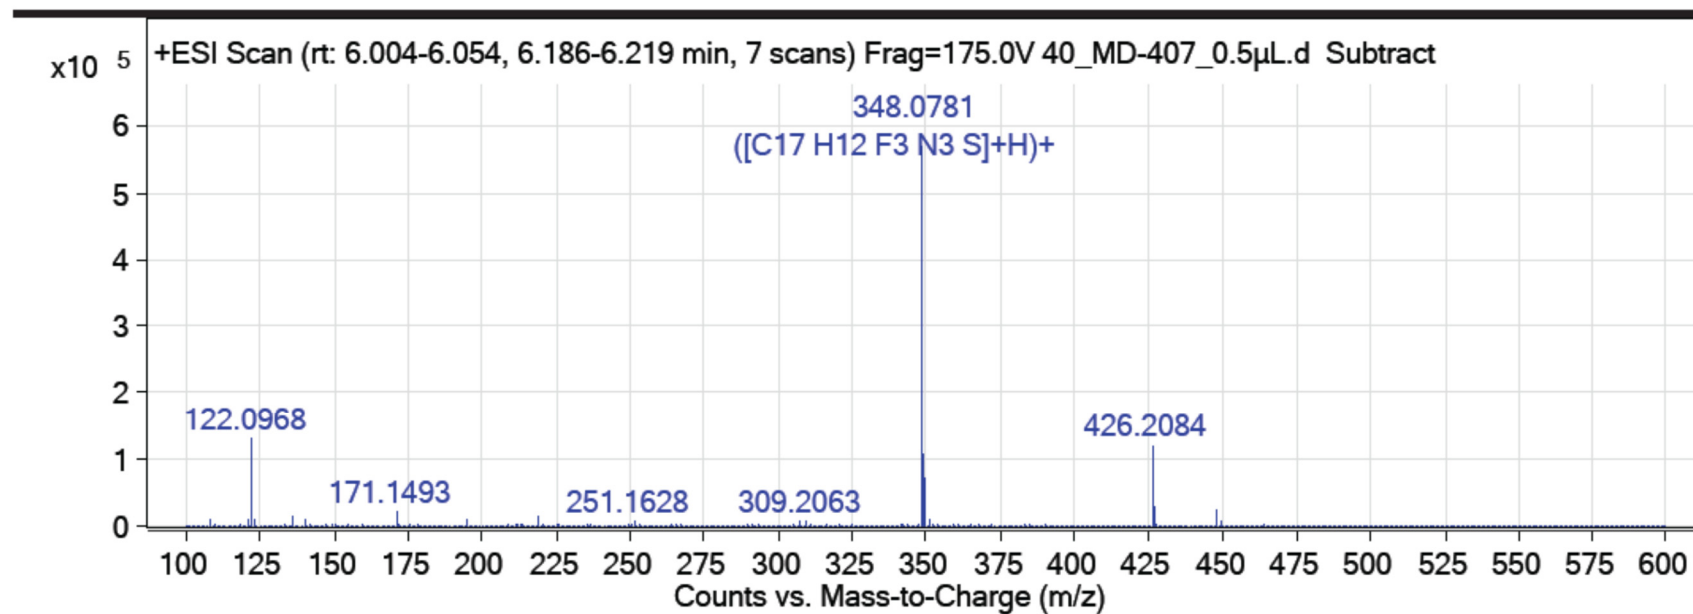

#### Formula Calculator Results

| Formula         | Best | Mass     | Tgt Mass | Diff (ppm) | Ion Species     | Score |
|-----------------|------|----------|----------|------------|-----------------|-------|
| C17 H12 F3 N3 S | True | 347.0708 | 347.0704 | -1.08      | C17 H13 F3 N3 S | 47.19 |

Figure S104. Mass spectrum and HRMS analysis of compound **46**.

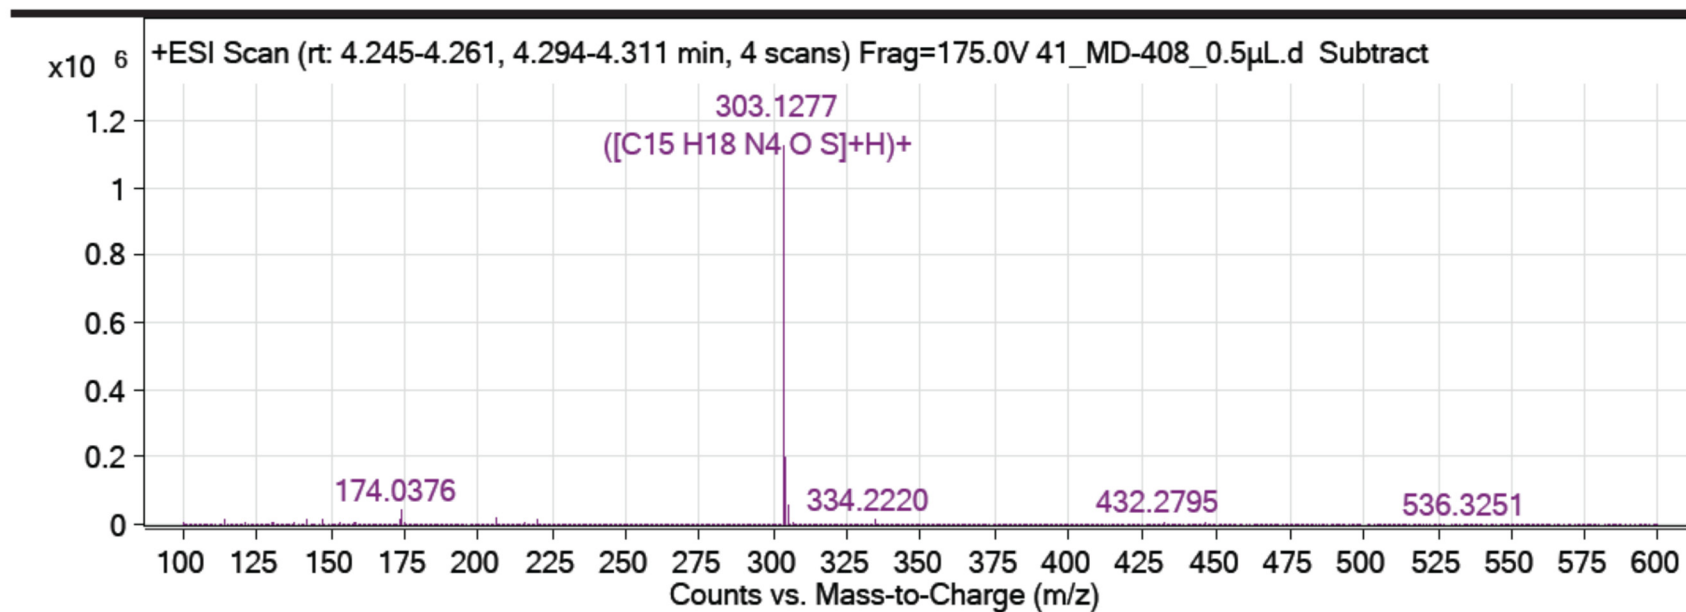

**Formula Calculator Results**

| Formula        | Best | Mass     | Tgt Mass | Diff (ppm) | Ion Species    | Score |
|----------------|------|----------|----------|------------|----------------|-------|
| C15 H18 N4 O S | True | 302.1205 | 302.1201 | -1.16      | C15 H19 N4 O S | 98    |

Figure S105. Mass spectrum and HRMS analysis of compound **47**.

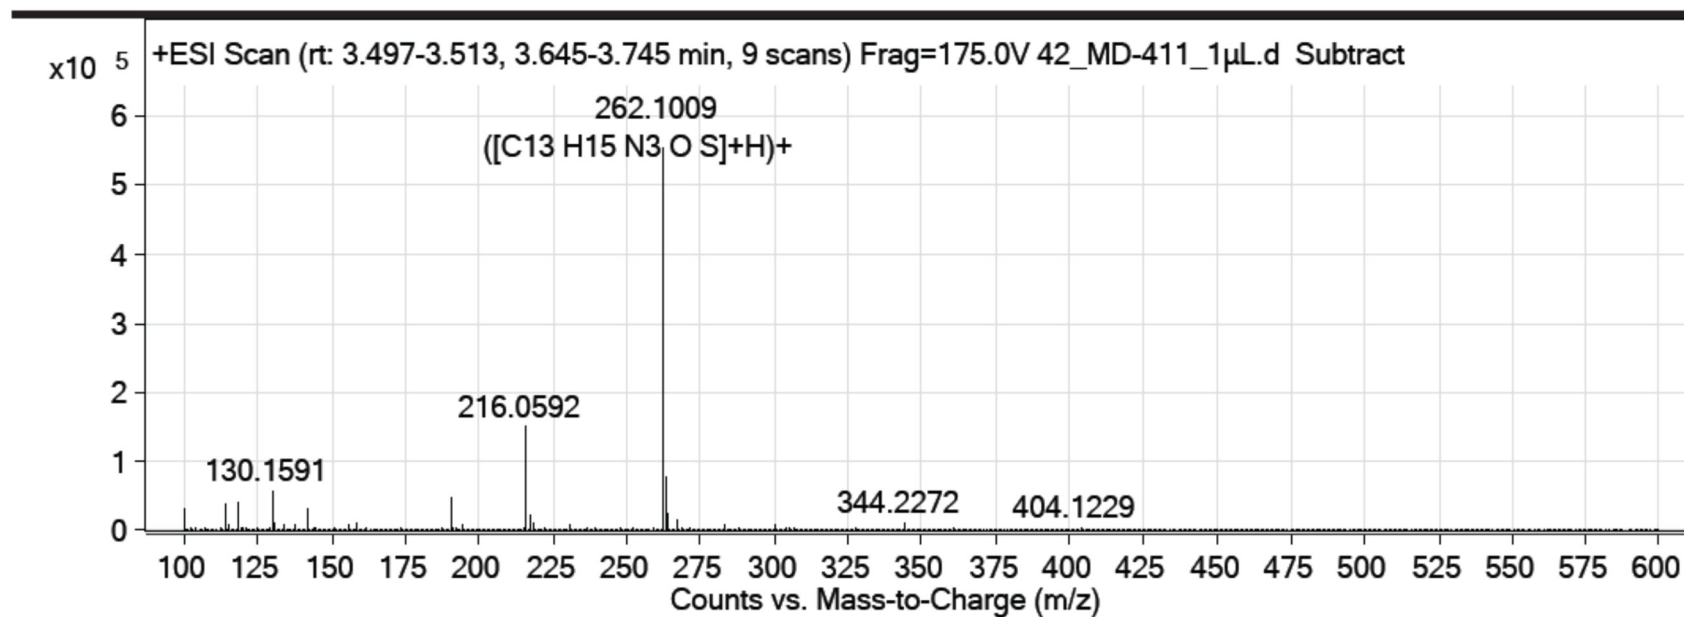

#### Formula Calculator Results

| Formula        | Best | Mass     | Tgt Mass | Diff (ppm) | Ion Species    | Score |
|----------------|------|----------|----------|------------|----------------|-------|
| C13 H15 N3 O S | True | 261.0937 | 261.0936 | -0.47      | C13 H16 N3 O S | 98.04 |

Figure S106. Mass spectrum and HRMS analysis of compound **48**.

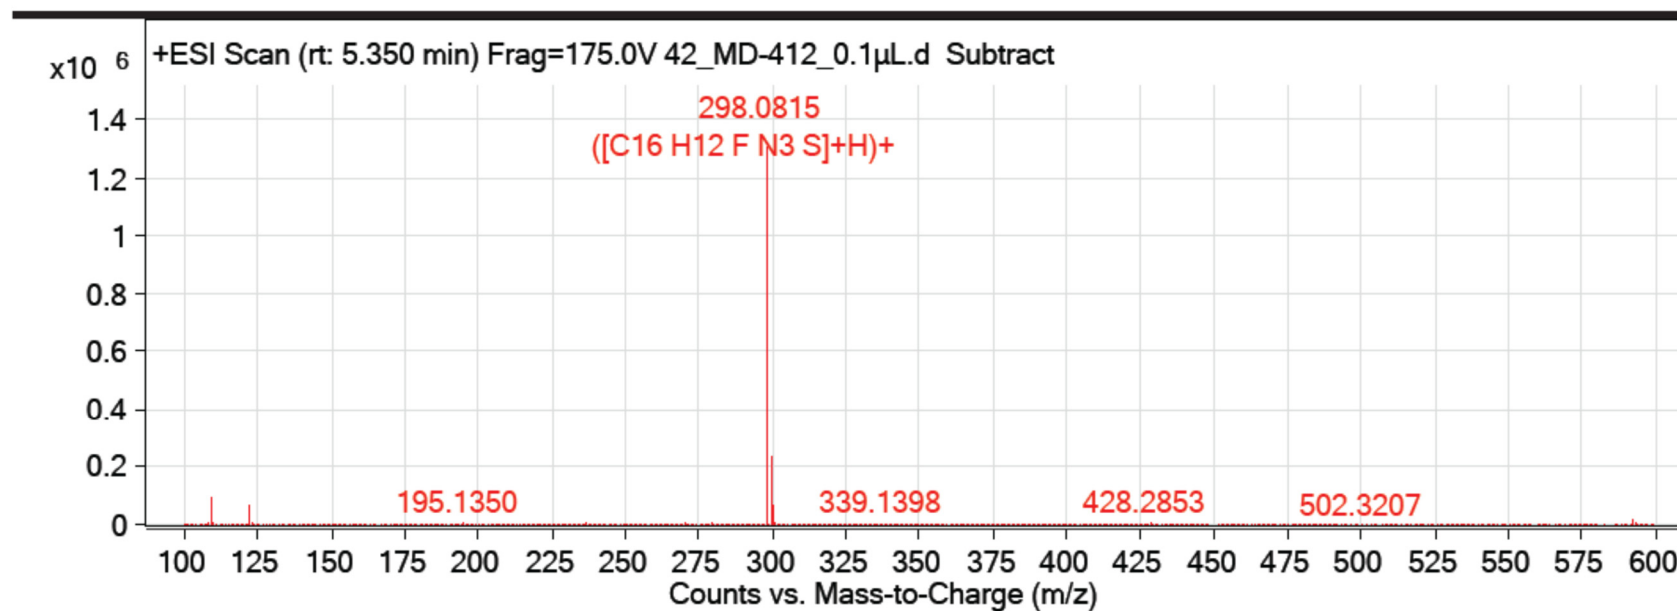

#### Formula Calculator Results

| Formula        | Best | Mass     | Tgt Mass | Diff (ppm) | Ion Species    | Score |
|----------------|------|----------|----------|------------|----------------|-------|
| C16 H12 F N3 S | True | 297.0742 | 297.0736 | -2.14      | C16 H13 F N3 S | 97.4  |

Figure S107. Mass spectrum and HRMS analysis of compound **49**.



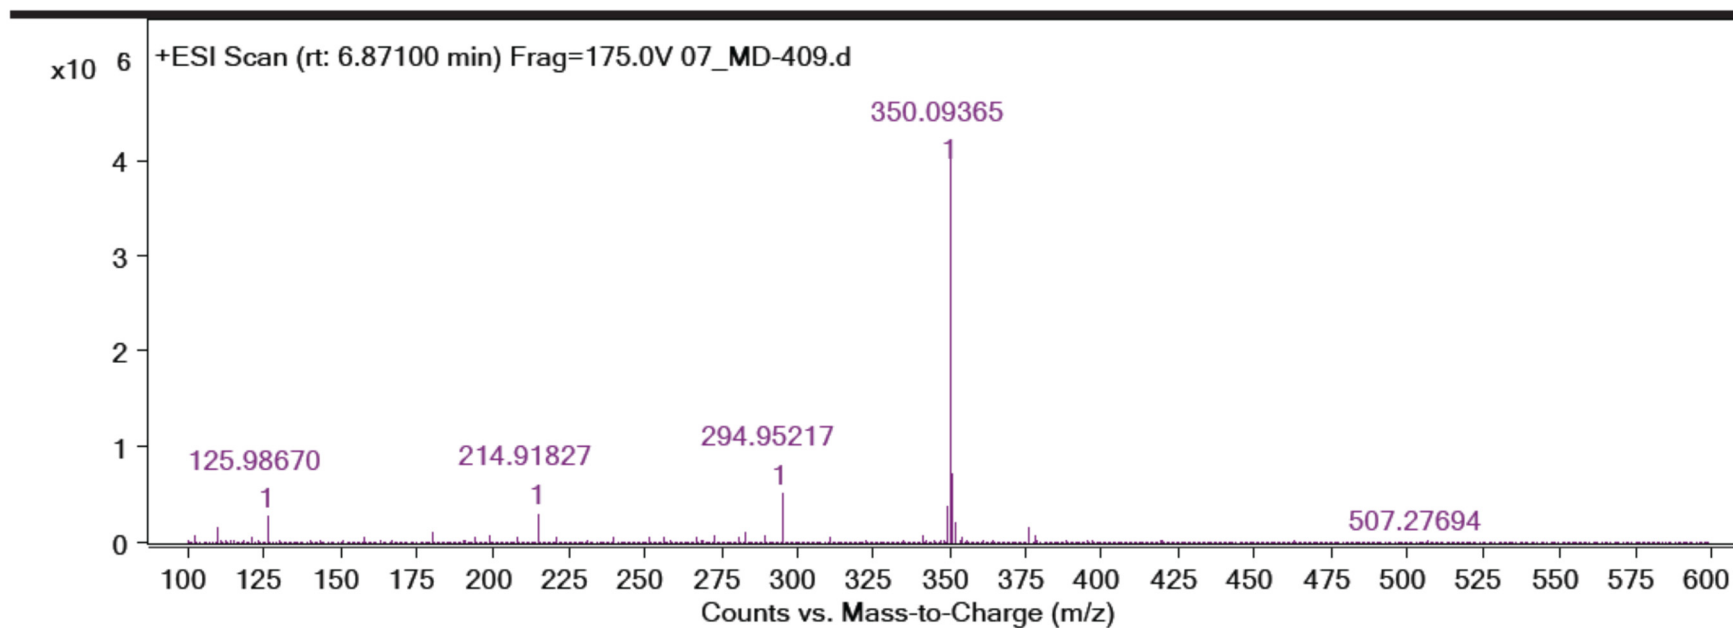

#### Formula Calculator Results

| Formula         | Best | Mass      | Tgt Mass  | Diff (ppm) | Ion Species     | Score |
|-----------------|------|-----------|-----------|------------|-----------------|-------|
| C17 H14 F3 N3 S | True | 349.08642 | 349.08605 | -1.07      | C17 H15 F3 N3 S | 97.2  |

Figure S108. Mass spectrum and HRMS analysis of compound **50**.

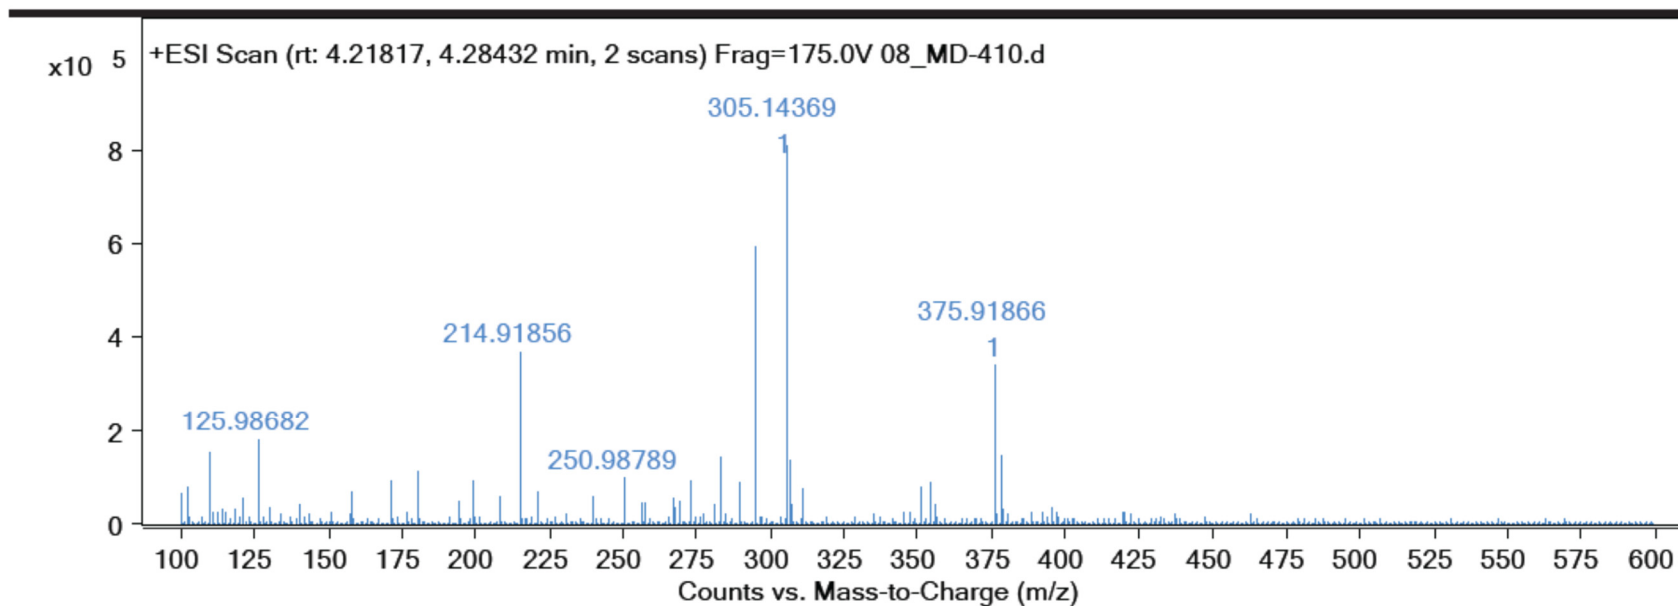

#### Formula Calculator Results

| Formula        | Best | Mass      | Tgt Mass  | Diff (ppm) | Ion Species    | Score |
|----------------|------|-----------|-----------|------------|----------------|-------|
| C15 H20 N4 O S | True | 304.13644 | 304.13578 | -2.16      | C15 H21 N4 O S | 96.94 |

Figure S109. Mass spectrum and HRMS analysis of compound **51**.

### 3. Spectrophotometric data and DNA binding

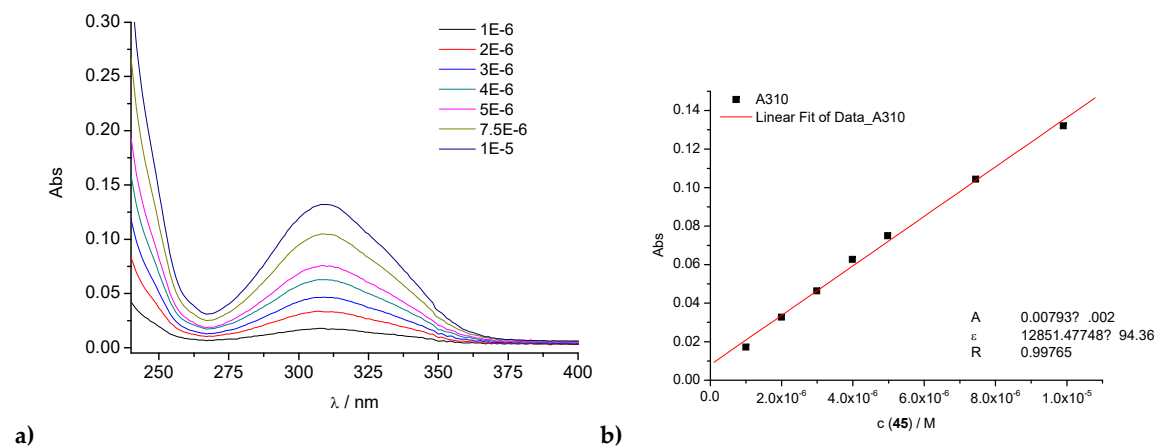

**Figure S110.** a) The UV/vis spectra dependence of **3** on concentration, b) dependence of absorbance at 310 nm on  $c(45)$  at 310 nm. Molar extinction coefficient ( $\epsilon$  at 310 nm) is  $12851.5 \text{ M}^{-1} \text{ cm}^{-1}$ .

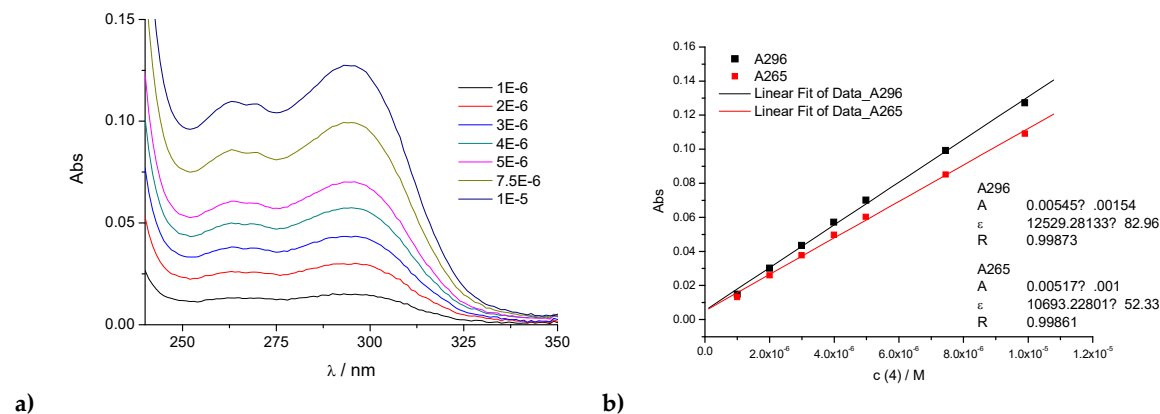

**Figure S111.** a) The UV/vis spectra dependence of **4** on concentration. The sample shows two absorbance peaks, at 296 nm and at 265 nm, b) dependence of absorbance at 296 nm on  $c(50)$  (black) and 265 nm (red). Molar extinction coefficient ( $\epsilon$ ) is  $12529.3 \text{ M}^{-1} \text{ cm}^{-1}$  at 296 nm and  $10693.2 \text{ M}^{-1} \text{ cm}^{-1}$  at 265 nm.

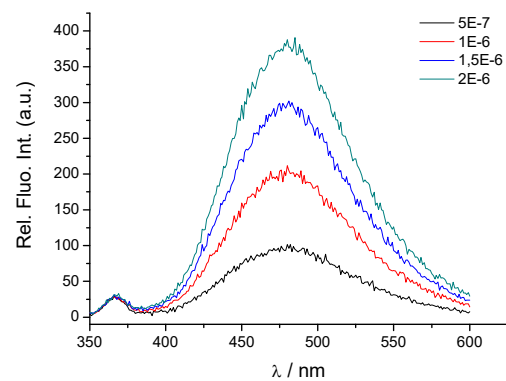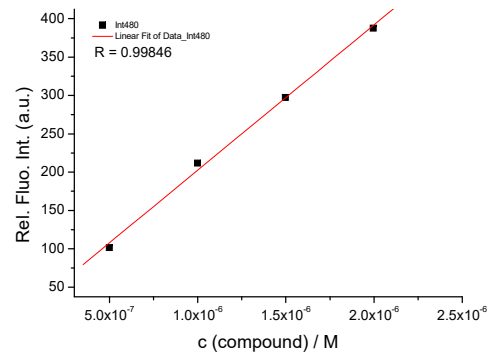

a) b)  
**Figure S112.** a) fluorescence intensity dependence of **45** on concentration. The sample shows a fluorescence maximum at 480 nm, b) dependence of emission at 480 nm on  $c(\mathbf{45})$ .

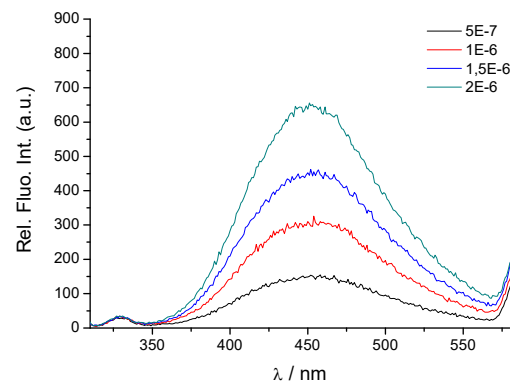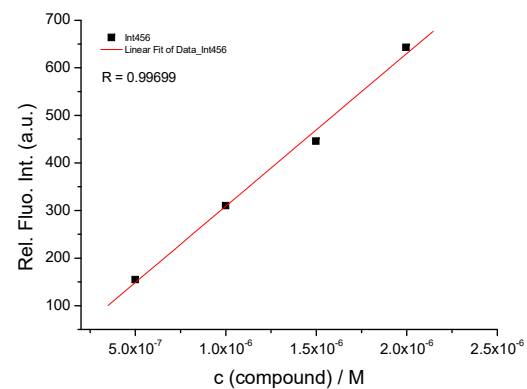

a) b)  
**Figure S113.** a) fluorescence intensity dependence of **50** on concentration. The sample shows a fluorescence maximum at 456 nm, b) dependence of emission at 456 nm on  $c(\mathbf{50})$ .

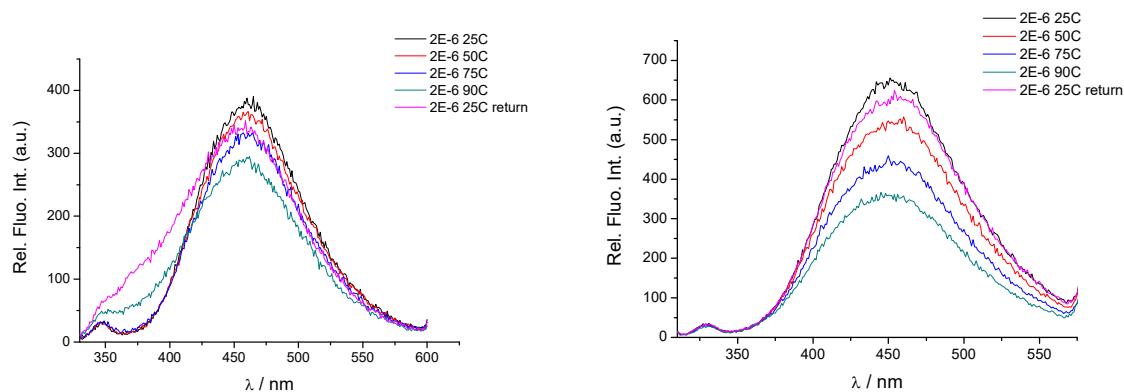

a) b)  
**Figure 114.** a) temperature stability of **3** at  $2 \times 10^{-6}$  M. Decrease of fluorescence intensity upon heating and cooling is visible, along with broadening of the peak, b) temperature stability of **4** at  $2 \times 10^{-6}$  M. The sample shows a slight decrease in fluorescence intensity after heating.

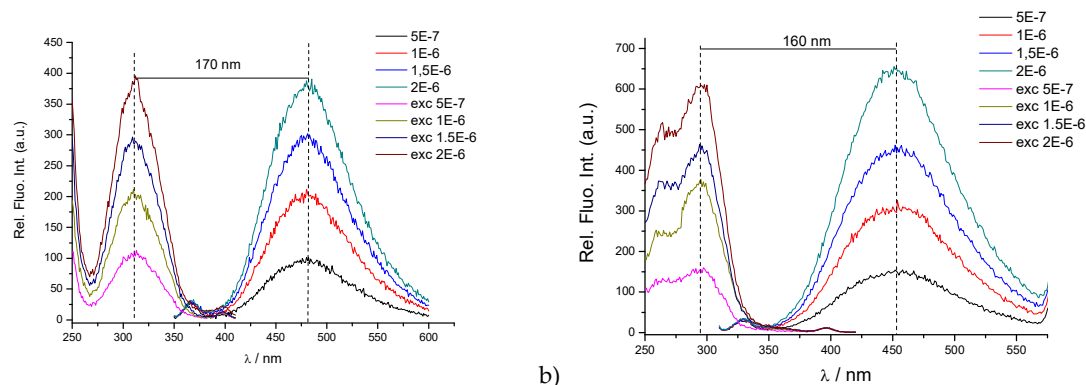

a) b)  
**Figure S115.** a) emission and excitation (exc) spectra of **45** at increasing concentrations displaying Stokes shift of 170 nm, b) emission and excitation (exc) spectra of **50** at increasing concentrations displaying Stokes shift of 160 nm.

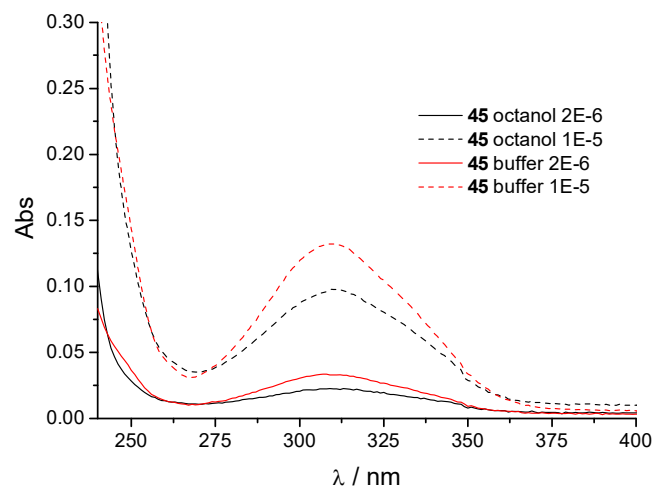

**Figure S116.** Comparison of UV/vis spectra of **45** at two concentrations (solid lines –  $c = 2 \times 10^{-6}$  M, dashed lines –  $c = 1 \times 10^{-5}$  M) in 1-octanol (black) and aqueous solution (red).

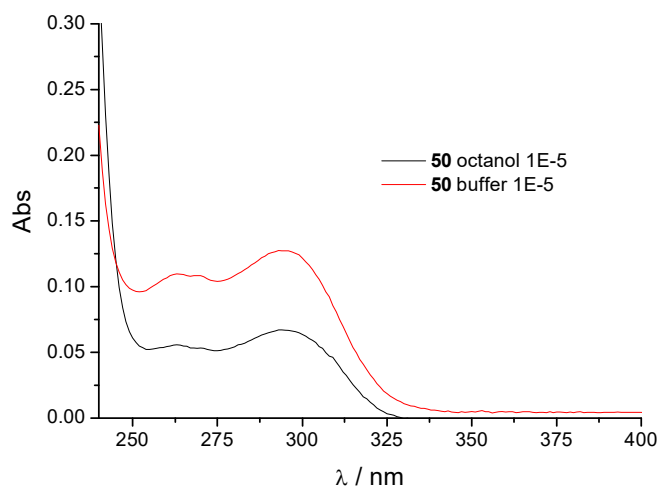

**Figure S117.** Comparison of UV/vis spectra of **50** at concentration  $c = 10 \mu\text{M}$  in 1-octanol (black) and aqueous solution (red).

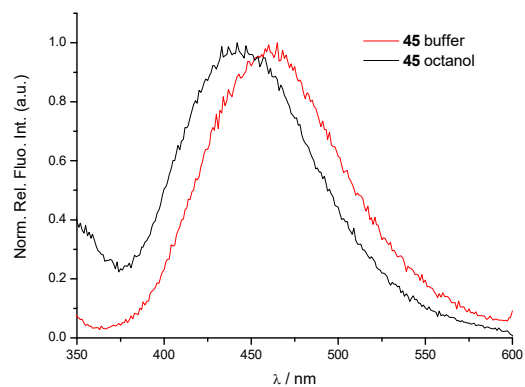

b)

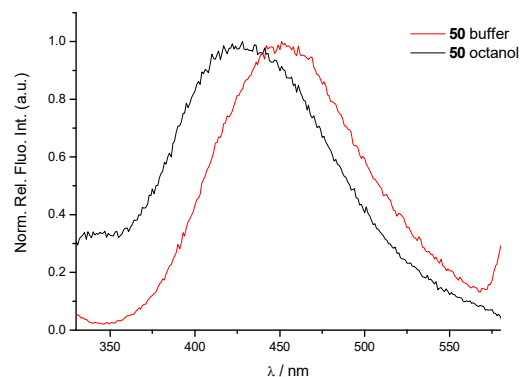

**Figure S118.** a) Comparison of normalised fluorescence spectra of **45** **50** in 1-octanol (black) and aqueous solution (red), b) comparison of normalised fluorescence spectra of **50** in 1-octanol (black) and aqueous solution (red).

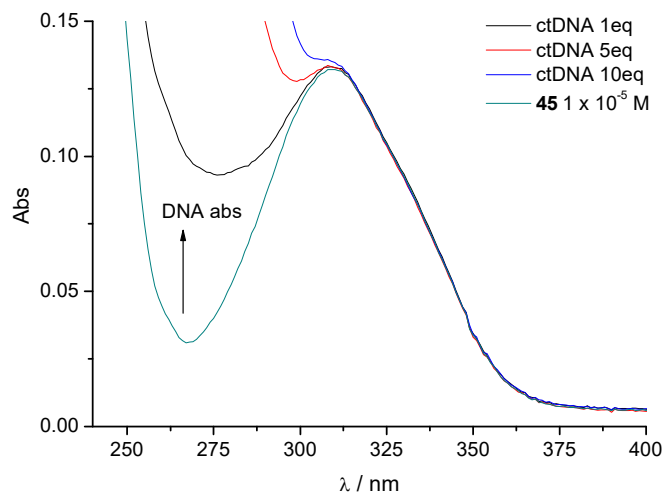

**Figure S119.** Difference in absorption for **45** ( $c = 1 \times 10^{-5}$  M) before and after the addition of ctDNA (1eq =  $1 \times 10^{-5}$  M; 5eq =  $5 \times 10^{-5}$  M; 10eq =  $1 \times 10^{-4}$  M).

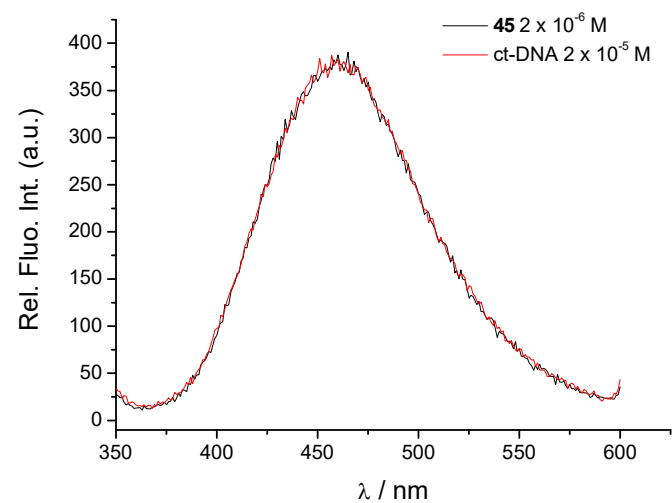

**Figure S120.** Impact of 10-fold *ct*-DNA addition on the fluorescence spectra for **45** ( $c = 2 \times 10^{-6}$  M,  $\lambda_{\text{exc}} = 310$  nm).

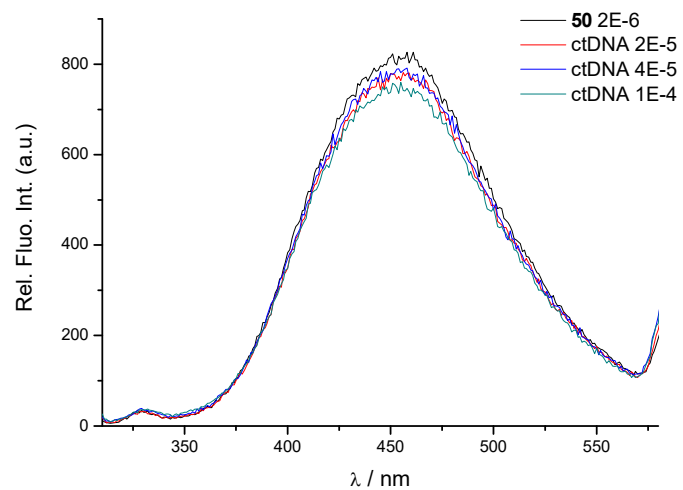

**Figure S121.** Impact of 10-, 20- and 50-fold *ct*-DNA addition on the fluorescence spectra for **50** ( $c = 2 \times 10^{-6}$  M,  $\lambda_{\text{exc}} = 296$  nm).



#### 4. Cartesian coordinates of ligands docked into AChE and BChE

**Table S1.**

Ligand **44** docked into AChE

|   |         |         |        |
|---|---------|---------|--------|
| C | -10.331 | -42.895 | 27.272 |
| H | -10.996 | -42.937 | 26.393 |
| C | -10.570 | -43.603 | 28.493 |
| C | -9.562  | -43.376 | 29.463 |
| S | -8.345  | -42.294 | 28.842 |
| C | -9.182  | -42.162 | 27.326 |
| H | -8.819  | -41.545 | 26.487 |
| C | -9.562  | -43.957 | 30.756 |
| H | -8.740  | -43.730 | 31.456 |
| C | -10.578 | -44.803 | 31.149 |
| H | -10.595 | -45.265 | 32.150 |
| C | -11.594 | -45.045 | 30.202 |
| C | -11.603 | -44.474 | 28.917 |
| N | -12.730 | -45.815 | 30.248 |
| N | -13.415 | -45.761 | 29.122 |
| N | -12.743 | -44.960 | 28.321 |
| C | -13.224 | -46.639 | 31.353 |
| H | -12.645 | -46.685 | 32.305 |
| H | -13.379 | -47.678 | 30.980 |
| H | -14.270 | -46.331 | 31.587 |
| C | -13.245 | -44.675 | 26.952 |
| H | -12.525 | -44.028 | 26.398 |
| H | -13.199 | -45.592 | 26.320 |
| C | -14.653 | -44.067 | 26.917 |
| H | -15.445 | -44.825 | 27.119 |
| H | -14.846 | -43.399 | 27.789 |
| C | -14.862 | -43.358 | 25.595 |
| C | -14.490 | -42.013 | 25.433 |
| H | -14.019 | -41.476 | 26.273 |
| C | -14.705 | -41.348 | 24.234 |
| H | -14.405 | -40.292 | 24.129 |
| C | -15.304 | -42.017 | 23.153 |

|   |         |         |        |
|---|---------|---------|--------|
| C | -15.679 | -43.359 | 23.296 |
| H | -16.146 | -43.898 | 22.454 |
| C | -15.457 | -44.011 | 24.512 |
| H | -15.759 | -45.066 | 24.620 |
| O | -15.466 | -41.281 | 22.026 |
| C | -16.719 | -40.643 | 21.801 |
| H | -16.852 | -40.038 | 20.874 |
| H | -16.965 | -40.009 | 22.685 |
| H | -17.528 | -41.408 | 21.852 |

Ligand **45** docked into AChE

|   |         |         |        |
|---|---------|---------|--------|
| N | -12.903 | -44.401 | 27.744 |
| C | -11.701 | -44.215 | 28.385 |
| C | -11.759 | -45.054 | 29.512 |
| N | -12.988 | -45.660 | 29.432 |
| N | -13.671 | -45.267 | 28.374 |
| C | -10.565 | -43.413 | 28.121 |
| C | -9.526  | -43.540 | 29.078 |
| C | -9.593  | -44.390 | 30.211 |
| H | -8.741  | -44.433 | 30.911 |
| C | -10.710 | -45.163 | 30.449 |
| H | -10.779 | -45.830 | 31.324 |
| S | -8.180  | -42.516 | 28.661 |
| C | -9.004  | -41.943 | 27.245 |
| H | -8.568  | -41.207 | 26.549 |
| C | -10.244 | -42.490 | 27.075 |
| H | -10.916 | -42.250 | 26.234 |
| C | -13.580 | -46.636 | 30.350 |
| H | -13.003 | -46.968 | 31.244 |
| H | -13.881 | -47.537 | 29.766 |
| H | -14.570 | -46.251 | 30.688 |
| C | -13.355 | -43.750 | 26.498 |
| H | -12.484 | -43.397 | 25.898 |
| H | -13.838 | -42.769 | 26.717 |
| C | -14.272 | -44.627 | 25.654 |
| H | -13.955 | -45.696 | 25.643 |

|   |         |         |        |
|---|---------|---------|--------|
| H | -15.275 | -44.772 | 26.118 |
| C | -14.353 | -44.023 | 24.255 |
| O | -14.701 | -44.654 | 23.278 |
| O | -13.996 | -42.740 | 24.268 |
| C | -15.081 | -41.762 | 24.279 |
| H | -15.949 | -42.082 | 24.901 |
| H | -14.827 | -40.838 | 24.848 |
| C | -15.457 | -41.484 | 22.838 |
| H | -16.285 | -40.737 | 22.846 |
| H | -15.711 | -42.408 | 22.269 |
| H | -14.589 | -41.164 | 22.216 |

Ligand **44** docked into BChE

|   |        |         |         |
|---|--------|---------|---------|
| C | 3.806  | -8.577  | -9.248  |
| H | 4.682  | -8.527  | -8.579  |
| C | 2.805  | -7.558  | -9.334  |
| C | 1.787  | -7.869  | -10.271 |
| S | 2.094  | -9.412  | -11.021 |
| C | 3.547  | -9.617  | -10.092 |
| H | 4.198  | -10.503 | -10.176 |
| C | 0.680  | -7.029  | -10.545 |
| H | -0.071 | -7.343  | -11.290 |
| C | 0.530  | -5.824  | -9.892  |
| H | -0.325 | -5.157  | -10.092 |
| C | 1.529  | -5.490  | -8.954  |
| C | 2.632  | -6.316  | -8.676  |
| N | 1.700  | -4.397  | -8.141  |
| N | 2.792  | -4.488  | -7.406  |
| N | 3.354  | -5.635  | -7.723  |
| C | 0.845  | -3.215  | -8.018  |
| H | 0.984  | -2.327  | -7.358  |
| H | -0.174 | -3.604  | -7.788  |
| H | 0.745  | -2.808  | -9.051  |
| C | 4.620  | -6.057  | -7.070  |
| H | 5.134  | -6.837  | -7.679  |

|   |        |        |        |
|---|--------|--------|--------|
| H | 4.408  | -6.648 | -6.149 |
| C | 5.577  | -4.898 | -6.759 |
| H | 5.301  | -4.363 | -5.821 |
| H | 5.454  | -4.047 | -7.469 |
| C | 7.000  | -5.416 | -6.726 |
| C | 8.066  | -4.571 | -6.372 |
| H | 7.858  | -3.524 | -6.094 |
| C | 9.375  | -5.030 | -6.366 |
| H | 10.196 | -4.349 | -6.085 |
| C | 9.658  | -6.361 | -6.717 |
| C | 8.608  | -7.218 | -7.071 |
| H | 8.815  | -8.266 | -7.346 |
| C | 7.296  | -6.737 | -7.073 |
| H | 6.474  | -7.416 | -7.355 |
| O | 10.967 | -6.712 | -6.677 |
| C | 11.879 | -5.870 | -5.980 |
| H | 12.955 | -6.159 | -5.947 |
| H | 11.512 | -5.725 | -4.937 |
| H | 11.795 | -4.834 | -6.384 |

Ligand **45** docked into BChE

|   |       |        |        |
|---|-------|--------|--------|
| N | 2.259 | -7.245 | -8.798 |
| C | 2.765 | -6.082 | -8.266 |
| C | 4.083 | -6.399 | -7.894 |
| N | 4.235 | -7.719 | -8.241 |
| N | 3.142 | -8.222 | -8.781 |
| C | 2.232 | -4.787 | -8.062 |
| C | 3.136 | -3.873 | -7.463 |
| C | 4.465 | -4.201 | -7.092 |
| H | 5.108 | -3.432 | -6.632 |
| C | 4.963 | -5.470 | -7.300 |
| H | 5.993 | -5.744 | -7.017 |
| S | 2.385 | -2.314 | -7.257 |
| C | 0.905 | -2.892 | -7.956 |
| H | 0.009 | -2.261 | -8.081 |
| C | 0.955 | -4.202 | -8.336 |

|   |        |         |         |
|---|--------|---------|---------|
| H | 0.113  | -4.744  | -8.798  |
| C | 5.417  | -8.569  | -8.080  |
| H | 6.341  | -8.144  | -7.623  |
| H | 5.679  | -9.006  | -9.072  |
| H | 5.125  | -9.480  | -7.508  |
| C | 0.902  | -7.456  | -9.342  |
| H | 0.154  | -6.842  | -8.788  |
| H | 0.529  | -8.475  | -9.088  |
| C | 0.804  | -7.203  | -10.842 |
| H | 1.387  | -6.310  | -11.167 |
| H | -0.205 | -6.845  | -11.153 |
| C | 1.226  | -8.477  | -11.567 |
| O | 2.030  | -8.490  | -12.478 |
| O | 0.599  | -9.541  | -11.067 |
| C | 1.417  | -10.728 | -10.830 |
| H | 0.973  | -11.656 | -11.261 |
| H | 2.362  | -10.730 | -11.422 |
| C | 1.654  | -10.825 | -9.336  |
| H | 2.278  | -11.731 | -9.155  |
| H | 0.709  | -10.823 | -8.744  |
| H | 2.098  | -9.897  | -8.905  |

**Table S2.** Free energies of binding,  $\Delta G_{\text{bind}}$  obtained by molecular docking of ligands **44** and **45** into the active site of AChE (4EY7.pdb), along with the number of conformational clusters and distribution of conformations.

| Ligand      | $\Delta G_{\text{bind}}/\text{kcal mol}^{-1}$ |         | Number of distinctive conformational clusters | Distribution of conformations within clusters with $n > 1$ ( $n$ = cluster population) |
|-------------|-----------------------------------------------|---------|-----------------------------------------------|----------------------------------------------------------------------------------------|
|             | lowest                                        | highest |                                               |                                                                                        |
| <b>44</b>   | -9.47                                         | -8.41   | 9                                             | 8, 2, 7, 3                                                                             |
| <b>45</b>   | -8.23                                         | -7.11   | 11                                            | 3, 2, 2, 6, 2, 4, 2,                                                                   |
| Galantamine | -10.10                                        | -10.10  | 1                                             | 25                                                                                     |

**Table S3.** Free energies of binding,  $\Delta G_{\text{bind}}$  obtained by molecular docking of ligands **44** and **45** into the active site of BChE (3DJY.pdb), along with the number of conformational clusters and distribution of conformations.

| Ligand      | $\Delta G_{\text{bind}}/\text{kcal mol}^{-1}$ |         | Number of distinctive conformational clusters | Distribution of conformations within clusters with $n > 1$ ( $n$ = cluster population) |
|-------------|-----------------------------------------------|---------|-----------------------------------------------|----------------------------------------------------------------------------------------|
|             | lowest                                        | highest |                                               |                                                                                        |
| <b>44</b>   | −8.57                                         | −8.38   | 3                                             | 15, 6, 4                                                                               |
| <b>45</b>   | −6.89                                         | −6.06   | 10                                            | 10, 2, 6                                                                               |
| Galantamine | −7.31                                         | −7.28   | 1                                             | 25                                                                                     |
